# Supplementary material for: Examining environmental matrix effects on quantitative non-targeted analysis estimates of per- and polyfluoroalkyl substances
Source: Springer Nature journal article supplement (doi:10.1007/s00216-025-05796-1), 2025-02-27
Supplement: MOESM2 [file 216_2025_5796_MOESM2_ESM.xlsx]

## Sheet: Author Information
Title: Examining Environmental Matrix Effects on Quantitative Non-Targeted Analysis Estimates of Per- and Polyfluoroalkyl Substances
Shirley Pu1,2*, James P. McCord3*, Rebecca A. Dickman4, Nickolas A. Sayresmith1,2, Helen Sepman5,6, Anneli Kruve5,6, Diana S. Aga4, Jon R. Sobus2*
1Oak Ridge Institute for Science and Education (ORISE) Participant, 109 T.W Alexander Drive, Research Triangle Park, NC 27711, USA
2U.S Environmental Protection Agency, Office of Research and Development, Center for Computational Toxicology and Exposure, 109 TW Alexander Dr., Research Triangle Park, NC 27711, USA
3U.S Environmental Protection Agency, Office of Research and Development, Center for Environmental Measurement and Modeling, 109 TW Alexander Dr., Research Triangle Park, NC 27711, USA
4Department of Chemistry, The University at Buffalo, State University of New York, 359 Natural Sciences Complex, Buffalo, New York 14260, USA
5Department of Environmental Science and Analytical Chemistry, Stockholm University, Svante Arrhenius väg 8, 114 18, Stockholm, Sweden
6Department of Materials and Environmental Chemistry, Stockholm University, Svante Arrhenius Väg 16, 114 18 Stockholm, Sweden
*Authors to whom correspondence should be addressed:
Shirley Pu (pu.shirley@epa.gov); ORCID: 0000-0002-0122-3797
James McCord (mccord.james@epa.gov); ORCID: 0000-0002-1780-4916
Jon Sobus (sobus.jon@epa.gov); ORCID: 0000-0003-0740-6604

## Sheet: Data Dictionary
Acryonyms and Abbreviations:
AAQ: Absolute Accuracy Quotient
AQ: Accuracy Quotient
BRFexpert: Bounded response factor bootstrap with expert-selected surrogates
BRFglobal: Bounded response factor bootstrap with global surrogates
CC: Calibration curve
CL: Confidence limit
CLFR: Confidence limit fold range
DW: Drinking water
IE: Ionization efficiency
IEreg: Ionization efficiency regression
ORP: Overall reliability percentage
RT: Retention time
Definitions:
Abun: Ion abundance
Conc: Concentration
LCL: Lower Confidence Limit
RF: Response factor
UCL: Upper Confidence Limit
Equations:

## Sheet: Table S1
Table S1. Mass-labeled chemicals (n=19) used for quantitative approach comparison; common names and short names of the corresponding native chemicals are used in the text and provided here.
Short name	Common name	Ionizing group	Mass-Labeled Common Name	Mass-Labeled Formula	Mass-Labeled DTXSID	Mass-labeled Monoisotopic Mass	# of fluorinated carbons	Chain length
PFBA	Perfluorobutanoic acid	Carboxylic acid	MPFBA	[13C]4HF7O2	DTXSID201028085	218	3	4
PFPeA	Perfluoropentanoic acid	Carboxylic acid	M5PFPeA	[13C]5HF9O2	DTXSID401337529	269	4	5
PFHxA	Perfluorohexanoic acid	Carboxylic acid	M5PFHxA	[13C]5CHF11O2	DTXSID801028083	318.997	5	6
PFHpA	Perfluoroheptanoic acid	Carboxylic acid	M4PFHpA	[13C]4C3HF13O2	DTXSID801337533	367.99	6	7
PFOA	Perfluorooctanoic acid	Carboxylic acid	M8PFOA	[13C]8HF15O2	DTXSID501337534	422	7	8
PFNA	Perfluorononanoic acid	Carboxylic acid	M9PFNA	[13C]9HF17O2	DTXSID201337535	473.001	8	9
PFDA	Perfluorodecanoic acid	Carboxylic acid	M6PFDA	[13C]6C4HF19O2	DTXSID50925719	519.987	9	10
PFUdA	Perfluoroundecanoic acid	Carboxylic acid	M7PFUdA	[13C]7C4HF21O2	DTXSID101028082	570.988	10	11
PFDoA	Perfluorododecanoic acid	Carboxylic acid	MPFDoA	[13C]2C10HF23O2	DTXSID001028089	615.968	11	12
PFTeDA	Perfluorotetradecanoic acid	Carboxylic acid	M2PFTeDA	[13C2]C12HF27O2	DTXSID301028088	715.961	13	14
FOSA	Perfluorooctanesulfonamide	Sulfonamide	M8FOSA	[13C]8H2F17NO2S	DTXSID001337591	506.98	8	9
NMeFOSAA	2-(N-Methylperfluorooctanesulfonamido)acetic acid	Carboxylic acid	d3-N-MeFOSAA	C11[2H]3H3F17NO4S	DTXSID701337609	573.993	8	12
NEtFOSAA	2-(N-Ethylperfluorooctanesulfonamido)acetic acid	Carboxylic acid	d5-N-EtFOSAA	C12[2H]5H3F17NO4S	DTXSID001337610	590.022	8	12
PFBS	Perfluorobutanesulfonic acid	Sulfonic acid	M3PFBS	[13C]3CHF9O3S	DTXSID201337561	302.96	4	5
PFHxS	Perfluorohexanesulfonic acid	Sulfonic acid	M3PFHxS	[13C]3C3HF13O3S	DTXSID901337562	402.954	6	7
PFOS	Perfluorooctanesulfonic acid	Sulfonic acid	M8PFOS	[13C]8HF17O3S	DTXSID601337563	507.964	8	9
4:2 FTS	4:2 Fluorotelomer sulfonic acid	Sulfonic acid	M2-4:2FTS	[13C2]C4H5F9O3S	DTXSID801337614	329.988	4	7
6:2 FTS	6:2 Fluorotelomer sulfonic acid	Sulfonic acid	M2-6:2FTS	[13C]2C6H5F13O3S	DTXSID501337615	429.982	6	9
8:2 FTS	8:2 Fluorotelomer sulfonic acid	Sulfonic acid	M2-8:2FTS	[13C]2C8H5F17O3S	DTXSID201337616	529.976	8	11

## Sheet: Table S2
Table S2. Surrogate selections for the bounded response factor bootstrap qNTA approach with expert-selected surrogates (BRFexpert)
Compound	Surrogate_1	Surrogate_2	Surrogate_3
PFBS	PFHxS	PFOS	4:2 FTS
PFHxS	PFBS	4:2 FTS	PFOS
PFOS	PFHxS	8:2 FTS	PFBS
PFBA	PFPeA	PFHxA	PFHpA
PFPeA	PFBA	PFHxA	PFHpA
PFHxA	PFPeA	PFHpA	PFOA
PFHpA	PFHxA	PFOA	PFNA
PFOA	PFNA	PFHxA	PFHpA
PFNA	PFOA	PFDA	PFHpA
PFDA	PFNA	PFOA	PFUdA
PFUdA	PFDA	PFDoA	PFTeDA
PFDoA	PFDA	PFUdA	PFTeDA
PFTeDA	PFDoA	PFUdA	PFDA
4:2 FTS	6:2 FTS	8:2 FTS	PFBS
6:2 FTS	4:2 FTS	8:2 FTS	PFHxS
8:2 FTS	6:2 FTS	4:2 FTS	PFOS
NEtFOSAA	NMeFOSAA	FOSA	PFOS
NMeFOSAA	NEtFOSAA	FOSA	PFOS
FOSA	NMeFOSAA	NEtFOSAA	PFOS

## Sheet: Table S3
Table S3. Data related to the ionization efficiency (IE) regression (IEreg) qNTA approach, including SMILES string and retention time (RT, minutes) for each chemical. The native chemicals corresponding to the mass-labeled chemicals were used for IE prediction as mass-labeled chemicals were not part of the training data; they are expected to have the same IE. The predicted IE using all available t…
ID	SMILES	Solvent_RT	DW_RT	Sludge_RT	logIE_Predicted	Used_in_Model	logIE_Predicted_LOO
PFBA	OC(=O)C(F)(F)C(F)(F)C(F)(F)F	8.92	9.08	9.07	0.282237	0	NA
PFPeA	OC(=O)C(F)(F)C(F)(F)C(F)(F)C(F)(F)F	11.77	11.93	11.89	1.79616	1	1.22644
4:2 FTS	OS(=O)(=O)CCC(F)(F)C(F)(F)C(F)(F)C(F)(F)F	13.15	13.3	13.25	1.89728	1	1.79624
PFHxA	OC(=O)C(F)(F)C(F)(F)C(F)(F)C(F)(F)C(F)(F)F	13.81	14	13.93	1.56594	1	1.59329
PFBS	OS(=O)(=O)C(F)(F)C(F)(F)C(F)(F)C(F)(F)F	14.31	14.53	14.43	2.37882	1	2.14144
PFHpA	OC(=O)C(F)(F)C(F)(F)C(F)(F)C(F)(F)C(F)(F)C(F)(F)F	15.51	15.72	15.66	1.702	1	1.79816
6:2 FTS	OS(=O)(=O)CCC(F)(F)C(F)(F)C(F)(F)C(F)(F)C(F)(F)C(F)(F)F	16.33	16.55	16.5	1.84011	1	1.98041
PFOA	OC(=O)C(F)(F)C(F)(F)C(F)(F)C(F)(F)C(F)(F)C(F)(F)C(F)(F)F	17.03	17.26	17.21	2.01605	1	2.04265
PFHxS	OS(=O)(=O)C(F)(F)C(F)(F)C(F)(F)C(F)(F)C(F)(F)C(F)(F)F	17.83	18.09	18.02	2.47111	1	2.39536
PFNA	OC(=O)C(F)(F)C(F)(F)C(F)(F)C(F)(F)C(F)(F)C(F)(F)C(F)(F)C(F)(F)F	18.47	18.72	18.67	2.01605	1	2.04878
8:2 FTS	OS(=O)(=O)CCC(F)(F)C(F)(F)C(F)(F)C(F)(F)C(F)(F)C(F)(F)C(F)(F)C(F)(F)F	19.13	19.37	19.34	1.79935	1	1.78056
PFDA	OC(=O)C(F)(F)C(F)(F)C(F)(F)C(F)(F)C(F)(F)C(F)(F)C(F)(F)C(F)(F)C(F)(F)F	19.88	20.14	20.09	2.1696	1	2.29362
PFOS	OS(=O)(=O)C(F)(F)C(F)(F)C(F)(F)C(F)(F)C(F)(F)C(F)(F)C(F)(F)C(F)(F)F	20.78	21.04	21	2.68435	1	2.47938
PFUdA	C(=O)(C(C(C(C(C(C(C(C(C(C(F)(F)F)(F)F)(F)F)(F)F)(F)F)(F)F)(F)F)(F)F)(F)F)(F)F)O	21.28	21.54	21.47	1.90966	1	1.84528
NMeFOSAA	CN(CC(O)=O)S(=O)(=O)C(F)(F)C(F)(F)C(F)(F)C(F)(F)C(F)(F)C(F)(F)C(F)(F)C(F)(F)F	22.21	22.53	22.35	2.13959	1	2.25662
PFDoA	OC(=O)C(F)(F)C(F)(F)C(F)(F)C(F)(F)C(F)(F)C(F)(F)C(F)(F)C(F)(F)C(F)(F)C(F)(F)C(F)(F)F	22.69	22.96	22.92	2.23589	1	2.22012
NEtFOSAA	CCN(CC(O)=O)S(=O)(=O)C(F)(F)C(F)(F)C(F)(F)C(F)(F)C(F)(F)C(F)(F)C(F)(F)C(F)(F)F	23.42	23.77	23.58	1.89017	1	2.2061
FOSA	C(C(C(C(C(F)(F)S(=O)(=O)N)(F)F)(F)F)(F)F)(C(C(C(F)(F)F)(F)F)(F)F)(F)F	25.06	25.07	25.21	2.47543	1	2.6443
PFTeDA	OC(=O)C(F)(F)C(F)(F)C(F)(F)C(F)(F)C(F)(F)C(F)(F)C(F)(F)C(F)(F)C(F)(F)C(F)(F)C(F)(F)C(F)(F)C(F)(F)F	25.45	25.8	25.77	2.23589	1	2.41018

## Sheet: Table S4
Table S4. Full results table of all data points with associated concentration estimates and performance metrics from each quantitation approach.
									Calibration Curve Approach (CC)								Bounded Response Factor Bootstrap with Expert-Selected Surrogates (BRFexpert)											Bounded Response Factor Bootstrap with Global Surrogates (BRFglobal)											Ionization Efficiency Regression (IEreg)
Matrix	Chemical	Molar Mass	Concentration (ng/g)	Concentration (µM)	Replicate Number	Ion Abundance	Response Factor (µM-1)	log10(Predicted Ionization Efficiency)	Lower CL Estimate (ng/g)	Best Estimate (ng/g)	Upper CL Estimate (ng/g)	Accuracy Quotient (AQ)	Absolute Accuracy Quotient (AAQ)	Confidence Limit Fold Range (CLFR)	Lower CL Exceedance (TRUE/FALSE)	Upper CL Exceedance (TRUE/FALSE)	RF0.975 Estimate	RF0.5 Estimate	RF0.025 Estimate	Lower CL Estimate (ng/g)	Best Estimate (ng/g)	Upper CL Estimate (ng/g)	Accuracy Quotient (AQ)	Absolute Accuracy Quotient (AAQ)	Confidence Limit Fold Range (CLFR)	Lower CL Exceedance (TRUE/FALSE)	Upper CL Exceedance (TRUE/FALSE)	RF0.975 Estimate	RF0.5 Estimate	RF0.025 Estimate	Lower CL Estimate (ng/g)	Best Estimate (ng/g)	Upper CL Estimate (ng/g)	Accuracy Quotient (AQ)	Absolute Accuracy Quotient (AAQ)	Confidence Limit Fold Range (CLFR)	Lower CL Exceedance (TRUE/FALSE)	Upper CL Exceedance (TRUE/FALSE)	log10(RF0.975) Estimate	log10(RF0.5) Estimate	log10(RF0.025) Estimate	Lower CL Estimate (ng/g)	Best Estimate (ng/g)	Upper CL Estimate (ng/g)	Accuracy Quotient (AQ)	Absolute Accuracy Quotient (AAQ)	Confidence Limit Fold Range (CLFR)	Lower CL Exceedance (TRUE/FALSE)	Upper CL Exceedance (TRUE/FALSE)
Solvent	MPFBA	218	0.5	0.00229358	1	2.66805e+06	1.16327e+09		0.364852	0.413098	0.467238	0.826196	1.21037	1.28062	FALSE	TRUE	4.48881e+09	3.7349e+09	2.11449e+09	0.129574	0.15573	0.275072	0.31146	3.21069	2.12289	FALSE	TRUE	7.65321e+09	4.1196e+09	1.17126e+09	0.0759988	0.141187	0.496588	0.282374	3.5414	6.53416	FALSE	TRUE
Solvent	MPFBA	218	0.5	0.00229358	2	2.93551e+06	1.27988e+09		0.398216	0.46096	0.53284	0.921919	1.08469	1.33807	FALSE	FALSE	4.48881e+09	3.7349e+09	2.11449e+09	0.142564	0.171341	0.302647	0.342683	2.91815	2.12289	FALSE	TRUE	7.65321e+09	4.1196e+09	1.17126e+09	0.0836174	0.155341	0.54637	0.310681	3.21873	6.53416	FALSE	FALSE
Solvent	MPFBA	218	0.5	0.00229358	3	2.95094e+06	1.28661e+09		0.400364	0.46373	0.536365	0.927459	1.07821	1.33969	FALSE	FALSE	4.48881e+09	3.7349e+09	2.11449e+09	0.143313	0.172242	0.304237	0.344483	2.9029	2.12289	FALSE	TRUE	7.65321e+09	4.1196e+09	1.17126e+09	0.0840568	0.156157	0.54924	0.312314	3.20191	6.53416	FALSE	FALSE
Solvent	MPFBA	218	1	0.00458716	1	6.69787e+06	1.46013e+09		0.90219	1.04296	1.20442	1.04296	1.04296	1.335	FALSE	FALSE	4.48881e+09	3.7349e+09	2.11449e+09	0.325283	0.390944	0.690539	0.390944	2.55791	2.12289	FALSE	TRUE	7.65321e+09	4.1196e+09	1.17126e+09	0.190787	0.354436	1.24663	0.354436	2.82139	6.53416	FALSE	FALSE
Solvent	MPFBA	218	1	0.00458716	2	6.68731e+06	1.45783e+09		0.900546	1.04118	1.2025	1.04118	1.04118	1.3353	FALSE	FALSE	4.48881e+09	3.7349e+09	2.11449e+09	0.32477	0.390328	0.689451	0.390328	2.56195	2.12289	FALSE	TRUE	7.65321e+09	4.1196e+09	1.17126e+09	0.190486	0.353877	1.24467	0.353877	2.82584	6.53416	FALSE	FALSE
Solvent	MPFBA	218	1	0.00458716	3	6.85962e+06	1.4954e+09		0.927894	1.07026	1.23323	1.07026	1.07026	1.32906	FALSE	FALSE	4.48881e+09	3.7349e+09	2.11449e+09	0.333139	0.400385	0.707216	0.400385	2.49759	2.12289	FALSE	TRUE	7.65321e+09	4.1196e+09	1.17126e+09	0.195395	0.362996	1.27674	0.362996	2.75485	6.53416	FALSE	FALSE
Solvent	MPFBA	218	5	0.0229358	1	3.59952e+07	1.56939e+09		4.62935	5.31873	6.10868	1.06375	1.06375	1.31956	FALSE	FALSE	4.48881e+09	3.7349e+09	2.11449e+09	1.74811	2.10098	3.71104	0.420196	2.37984	2.12289	FALSE	TRUE	7.65321e+09	4.1196e+09	1.17126e+09	1.02531	1.90478	6.69956	0.380956	2.62497	6.53416	FALSE	FALSE
Solvent	MPFBA	218	5	0.0229358	2	3.6102e+07	1.57405e+09		4.64473	5.33484	6.1254	1.06697	1.06697	1.31878	FALSE	FALSE	4.48881e+09	3.7349e+09	2.11449e+09	1.7533	2.10722	3.72206	0.421443	2.3728	2.12289	FALSE	TRUE	7.65321e+09	4.1196e+09	1.17126e+09	1.02836	1.91044	6.71945	0.382087	2.6172	6.53416	FALSE	FALSE
Solvent	MPFBA	218	5	0.0229358	3	3.69574e+07	1.61134e+09		4.77047	5.46379	6.25589	1.09276	1.09276	1.31138	FALSE	FALSE	4.48881e+09	3.7349e+09	2.11449e+09	1.79484	2.15715	3.81025	0.431429	2.31788	2.12289	FALSE	TRUE	7.65321e+09	4.1196e+09	1.17126e+09	1.05272	1.9557	6.87866	0.391141	2.55663	6.53416	FALSE	FALSE
Solvent	MPFBA	218	10	0.0458716	1	6.97582e+07	1.52073e+09		8.74964	10.0746	11.5989	1.00746	1.00746	1.32565	FALSE	FALSE	4.48881e+09	3.7349e+09	2.11449e+09	3.38782	4.07167	7.19195	0.407167	2.45599	2.12289	FALSE	TRUE	7.65321e+09	4.1196e+09	1.17126e+09	1.98704	3.69144	12.9837	0.369144	2.70897	6.53416	FALSE	FALSE
Solvent	MPFBA	218	10	0.0458716	2	7.35475e+07	1.60333e+09		9.25637	10.6287	12.2037	1.06287	1.06287	1.31841	FALSE	FALSE	4.48881e+09	3.7349e+09	2.11449e+09	3.57185	4.29285	7.58262	0.429285	2.32945	2.12289	FALSE	TRUE	7.65321e+09	4.1196e+09	1.17126e+09	2.09498	3.89197	13.689	0.389197	2.5694	6.53416	FALSE	FALSE
Solvent	MPFBA	218	10	0.0458716	3	7.26279e+07	1.58329e+09		9.12969	10.4942	12.0617	1.04942	1.04942	1.32115	FALSE	FALSE	4.48881e+09	3.7349e+09	2.11449e+09	3.52718	4.23917	7.48781	0.423917	2.35895	2.12289	FALSE	TRUE	7.65321e+09	4.1196e+09	1.17126e+09	2.06879	3.8433	13.5178	0.38433	2.60193	6.53416	FALSE	FALSE
Solvent	MPFBA	218	25	0.114679	1	1.87081e+08	1.63134e+09		22.8544	26.2734	30.2122	1.05094	1.05094	1.32194	FALSE	FALSE	4.48881e+09	3.7349e+09	2.11449e+09	9.08561	10.9196	19.2877	0.436785	2.28946	2.12289	FALSE	TRUE	7.65321e+09	4.1196e+09	1.17126e+09	5.32895	9.89989	34.8202	0.395996	2.52528	6.53416	FALSE	FALSE
Solvent	MPFBA	218	25	0.114679	2	1.84912e+08	1.61243e+09		22.5681	25.9636	29.8781	1.03854	1.03854	1.32391	FALSE	FALSE	4.48881e+09	3.7349e+09	2.11449e+09	8.98026	10.793	19.0641	0.43172	2.31632	2.12289	FALSE	TRUE	7.65321e+09	4.1196e+09	1.17126e+09	5.26716	9.7851	34.4165	0.391404	2.5549	6.53416	FALSE	FALSE
Solvent	MPFBA	218	25	0.114679	3	1.82501e+08	1.59141e+09		22.256	25.6195	29.4993	1.02478	1.02478	1.32545	FALSE	FALSE	4.48881e+09	3.7349e+09	2.11449e+09	8.86318	10.6523	18.8155	0.426091	2.34691	2.12289	FALSE	TRUE	7.65321e+09	4.1196e+09	1.17126e+09	5.19849	9.65753	33.9678	0.386301	2.58865	6.53416	FALSE	FALSE
Solvent	MPFBA	218	50	0.229358	1	3.55666e+08	1.55071e+09		42.3611	48.8013	56.2506	0.976025	1.02456	1.32788	FALSE	FALSE	4.48881e+09	3.7349e+09	2.11449e+09	17.273	20.7597	36.6686	0.415194	2.40851	2.12289	FALSE	TRUE	7.65321e+09	4.1196e+09	1.17126e+09	10.1311	18.8211	66.1981	0.376421	2.6566	6.53416	FALSE	FALSE
Solvent	MPFBA	218	50	0.229358	2	3.55353e+08	1.54934e+09		42.3241	48.7569	56.1975	0.975139	1.02549	1.32779	FALSE	FALSE	4.48881e+09	3.7349e+09	2.11449e+09	17.2578	20.7414	36.6363	0.414828	2.41064	2.12289	FALSE	TRUE	7.65321e+09	4.1196e+09	1.17126e+09	10.1221	18.8045	66.1397	0.37609	2.65894	6.53416	FALSE	FALSE
Solvent	MPFBA	218	50	0.229358	3	3.55814e+08	1.55135e+09		42.3785	48.8221	56.2756	0.976442	1.02413	1.32793	FALSE	FALSE	4.48881e+09	3.7349e+09	2.11449e+09	17.2802	20.7683	36.6838	0.415366	2.40752	2.12289	FALSE	TRUE	7.65321e+09	4.1196e+09	1.17126e+09	10.1353	18.8289	66.2255	0.376577	2.6555	6.53416	FALSE	FALSE
Solvent	MPFBA	218	100	0.458716	1	6.37876e+08	1.39057e+09		75.1872	84.9899	96.1259	0.849899	1.17661	1.27849	FALSE	TRUE	4.48881e+09	3.7349e+09	2.11449e+09	30.9786	37.2318	65.764	0.372318	2.68588	2.12289	FALSE	TRUE	7.65321e+09	4.1196e+09	1.17126e+09	18.1697	33.7549	118.724	0.337549	2.96253	6.53416	FALSE	FALSE
Solvent	MPFBA	218	100	0.458716	2	7.19613e+08	1.56876e+09		83.6781	96.5035	111.387	0.965035	1.03623	1.33113	FALSE	FALSE	4.48881e+09	3.7349e+09	2.11449e+09	34.9481	42.0027	74.1909	0.420027	2.3808	2.12289	FALSE	TRUE	7.65321e+09	4.1196e+09	1.17126e+09	20.498	38.0803	133.937	0.380803	2.62603	6.53416	FALSE	FALSE
Solvent	MPFBA	218	100	0.458716	3	7.1382e+08	1.55613e+09		83.0112	95.6831	110.379	0.956831	1.04512	1.32969	FALSE	FALSE	4.48881e+09	3.7349e+09	2.11449e+09	34.6668	41.6645	73.5936	0.416645	2.40012	2.12289	FALSE	TRUE	7.65321e+09	4.1196e+09	1.17126e+09	20.333	37.7737	132.859	0.377737	2.64734	6.53416	FALSE	FALSE
Solvent	MPFBA	218	250	1.14679	1	1.93824e+09	1.69015e+09		218.723	253.416	293.994	1.01366	1.01366	1.34413	FALSE	FALSE	4.48881e+09	3.7349e+09	2.11449e+09	94.131	113.132	199.83	0.452529	2.20981	2.12289	FALSE	TRUE	7.65321e+09	4.1196e+09	1.17126e+09	55.2104	102.567	360.753	0.410269	2.43742	6.53416	FALSE	FALSE
Solvent	MPFBA	218	250	1.14679	2	1.9267e+09	1.68008e+09		217.264	251.735	292.054	1.00694	1.00694	1.34423	FALSE	FALSE	4.48881e+09	3.7349e+09	2.11449e+09	93.5705	112.458	198.64	0.449834	2.22304	2.12289	FALSE	TRUE	7.65321e+09	4.1196e+09	1.17126e+09	54.8816	101.957	358.605	0.407826	2.45202	6.53416	FALSE	FALSE
Solvent	MPFBA	218	250	1.14679	3	1.93705e+09	1.68911e+09		218.572	253.242	293.794	1.01297	1.01297	1.34415	FALSE	FALSE	4.48881e+09	3.7349e+09	2.11449e+09	94.0731	113.063	199.707	0.45225	2.21117	2.12289	FALSE	TRUE	7.65321e+09	4.1196e+09	1.17126e+09	55.1764	102.504	360.531	0.410017	2.43892	6.53416	FALSE	FALSE
Solvent	M5PFPeA	269	0.5	0.00185874	1	4.06017e+06	2.18437e+09	1.22644	0.441858	0.484251	0.530421	0.968502	1.03252	1.20043	FALSE	FALSE	4.48881e+09	3.70814e+09	1.39196e+09	0.243313	0.294537	0.784637	0.589074	1.69758	3.22481	FALSE	FALSE	7.64583e+09	4.1196e+09	1.15902e+09	0.142847	0.265119	0.942336	0.530238	1.88594	6.59682	FALSE	FALSE	9.41967	8.95121	8.46534	0.415552	1.22203	3.74074	2.44406	2.44406	9.00186	FALSE	FALSE
Solvent	M5PFPeA	269	0.5	0.00185874	2	4.19874e+06	2.25892e+09	1.22644	0.459397	0.503899	0.552407	1.0078	1.0078	1.20246	FALSE	FALSE	4.48881e+09	3.70814e+09	1.39196e+09	0.251617	0.304589	0.811417	0.609179	1.64155	3.22481	FALSE	FALSE	7.64583e+09	4.1196e+09	1.15902e+09	0.147722	0.274168	0.974498	0.548335	1.8237	6.59682	FALSE	FALSE	9.41967	8.95121	8.46534	0.429735	1.26374	3.86841	2.52747	2.52747	9.00186	FALSE	FALSE
Solvent	M5PFPeA	269	0.5	0.00185874	3	4.20544e+06	2.26253e+09	1.22644	0.460288	0.504852	0.553425	1.0097	1.0097	1.20234	FALSE	FALSE	4.48881e+09	3.70814e+09	1.39196e+09	0.252019	0.305076	0.812713	0.610152	1.63894	3.22481	FALSE	FALSE	7.64583e+09	4.1196e+09	1.15902e+09	0.147958	0.274605	0.976054	0.549211	1.82079	6.59682	FALSE	FALSE	9.41967	8.95121	8.46534	0.430421	1.26576	3.87459	2.53151	2.53151	9.00186	FALSE	FALSE
Solvent	M5PFPeA	269	1	0.00371747	1	8.22465e+06	2.21243e+09	1.22644	0.905673	0.991315	1.0846	0.991315	1.00876	1.19756	FALSE	FALSE	4.48881e+09	3.70814e+09	1.39196e+09	0.492877	0.596641	1.58943	0.596641	1.67605	3.22481	FALSE	FALSE	7.64583e+09	4.1196e+09	1.15902e+09	0.289364	0.53705	1.90888	0.53705	1.86202	6.59682	FALSE	FALSE	9.41967	8.95121	8.46534	0.84178	2.47546	7.57759	2.47546	2.47546	9.00186	FALSE	FALSE
Solvent	M5PFPeA	269	1	0.00371747	2	8.08983e+06	2.17616e+09	1.22644	0.889504	0.972944	1.06377	0.972944	1.02781	1.19591	FALSE	FALSE	4.48881e+09	3.70814e+09	1.39196e+09	0.484797	0.586861	1.56338	0.586861	1.70398	3.22481	FALSE	FALSE	7.64583e+09	4.1196e+09	1.15902e+09	0.284621	0.528246	1.87759	0.528246	1.89306	6.59682	FALSE	FALSE	9.41967	8.95121	8.46534	0.827982	2.43488	7.45337	2.43488	2.43488	9.00186	FALSE	FALSE
Solvent	M5PFPeA	269	1	0.00371747	3	8.02993e+06	2.16005e+09	1.22644	0.88256	0.964789	1.05425	0.964789	1.0365	1.19453	FALSE	FALSE	4.48881e+09	3.70814e+09	1.39196e+09	0.481208	0.582516	1.5518	0.582516	1.71669	3.22481	FALSE	FALSE	7.64583e+09	4.1196e+09	1.15902e+09	0.282513	0.524335	1.86369	0.524335	1.90718	6.59682	FALSE	FALSE	9.41967	8.95121	8.46534	0.821851	2.41685	7.39819	2.41685	2.41685	9.00186	FALSE	FALSE
Solvent	M5PFPeA	269	5	0.0185874	1	4.16212e+07	2.23922e+09	1.22644	4.67925	5.10456	5.56774	1.02091	1.02091	1.18988	FALSE	FALSE	4.48881e+09	3.70814e+09	1.39196e+09	2.49422	3.01933	8.0434	0.603866	1.656	3.22481	FALSE	FALSE	7.64583e+09	4.1196e+09	1.15902e+09	1.46434	2.71776	9.65999	0.543553	1.83975	6.59682	FALSE	FALSE	9.41967	8.95121	8.46534	4.25987	12.5272	38.3467	2.50543	2.50543	9.00186	FALSE	FALSE
Solvent	M5PFPeA	269	5	0.0185874	2	4.17826e+07	2.2479e+09	1.22644	4.69962	5.1256	5.58942	1.02512	1.02512	1.18933	FALSE	FALSE	4.48881e+09	3.70814e+09	1.39196e+09	2.5039	3.03104	8.07459	0.606208	1.6496	3.22481	FALSE	FALSE	7.64583e+09	4.1196e+09	1.15902e+09	1.47002	2.7283	9.69745	0.545661	1.83264	6.59682	FALSE	FALSE	9.41967	8.95121	8.46534	4.27639	12.5757	38.4954	2.51515	2.51515	9.00186	FALSE	FALSE
Solvent	M5PFPeA	269	5	0.0185874	3	4.2494e+07	2.28618e+09	1.22644	4.79181	5.2184	5.68221	1.04368	1.04368	1.18582	FALSE	FALSE	4.48881e+09	3.70814e+09	1.39196e+09	2.54653	3.08265	8.21207	0.616529	1.62198	3.22481	FALSE	FALSE	7.64583e+09	4.1196e+09	1.15902e+09	1.49505	2.77476	9.86256	0.554951	1.80196	6.59682	FALSE	FALSE	9.41967	8.95121	8.46534	4.3492	12.7898	39.1509	2.55797	2.55797	9.00186	FALSE	FALSE
Solvent	M5PFPeA	269	10	0.0371747	1	8.03087e+07	2.16031e+09	1.22644	9.07188	9.89627	10.7951	0.989627	1.01048	1.18996	FALSE	FALSE	4.48881e+09	3.70814e+09	1.39196e+09	4.81264	5.82584	15.5199	0.582584	1.71649	3.22481	FALSE	FALSE	7.64583e+09	4.1196e+09	1.15902e+09	2.82547	5.24397	18.6391	0.524397	1.90695	6.59682	FALSE	FALSE	9.41967	8.95121	8.46534	8.21948	24.1713	73.9906	2.41713	2.41713	9.00186	FALSE	FALSE
Solvent	M5PFPeA	269	10	0.0371747	2	8.35832e+07	2.24839e+09	1.22644	9.47251	10.3221	11.2474	1.03221	1.03221	1.18737	FALSE	FALSE	4.48881e+09	3.70814e+09	1.39196e+09	5.00887	6.06338	16.1527	0.606338	1.64925	3.22481	FALSE	FALSE	7.64583e+09	4.1196e+09	1.15902e+09	2.94067	5.45778	19.3991	0.545778	1.83225	6.59682	FALSE	FALSE	9.41967	8.95121	8.46534	8.55461	25.1569	77.0074	2.51569	2.51569	9.00186	FALSE	FALSE
Solvent	M5PFPeA	269	10	0.0371747	3	8.31717e+07	2.23732e+09	1.22644	9.41993	10.2685	11.1931	1.02685	1.02685	1.18824	FALSE	FALSE	4.48881e+09	3.70814e+09	1.39196e+09	4.98421	6.03353	16.0731	0.603353	1.6574	3.22481	FALSE	FALSE	7.64583e+09	4.1196e+09	1.15902e+09	2.92619	5.43091	19.3036	0.543091	1.84131	6.59682	FALSE	FALSE	9.41967	8.95121	8.46534	8.5125	25.033	76.6283	2.5033	2.5033	9.00186	FALSE	FALSE
Solvent	M5PFPeA	269	25	0.0929368	1	2.09435e+08	2.25352e+09	1.22644	23.9806	26.1081	28.4273	1.04433	1.04433	1.18543	FALSE	FALSE	4.48881e+09	3.70814e+09	1.39196e+09	12.5508	15.1931	40.4738	0.607722	1.64549	3.22481	FALSE	FALSE	7.64583e+09	4.1196e+09	1.15902e+09	7.36846	13.6756	48.6084	0.547024	1.82807	6.59682	FALSE	FALSE	9.41967	8.95121	8.46534	21.4354	63.0358	192.958	2.52143	2.52143	9.00186	FALSE	FALSE
Solvent	M5PFPeA	269	25	0.0929368	2	2.07174e+08	2.2292e+09	1.22644	23.6823	25.8099	28.1314	1.0324	1.0324	1.18787	FALSE	FALSE	4.48881e+09	3.70814e+09	1.39196e+09	12.4153	15.0291	40.037	0.601163	1.66344	3.22481	FALSE	FALSE	7.64583e+09	4.1196e+09	1.15902e+09	7.28893	13.528	48.0837	0.54112	1.84802	6.59682	FALSE	FALSE	9.41967	8.95121	8.46534	21.204	62.3554	190.875	2.49422	2.49422	9.00186	FALSE	FALSE
Solvent	M5PFPeA	269	25	0.0929368	3	2.04292e+08	2.19819e+09	1.22644	23.314	25.43	27.7408	1.0172	1.0172	1.18988	FALSE	FALSE	4.48881e+09	3.70814e+09	1.39196e+09	12.2426	14.82	39.48	0.5928	1.68691	3.22481	FALSE	FALSE	7.64583e+09	4.1196e+09	1.15902e+09	7.18753	13.3398	47.4148	0.533592	1.87409	6.59682	FALSE	FALSE	9.41967	8.95121	8.46534	20.909	61.4879	188.22	2.45952	2.45952	9.00186	FALSE	FALSE
Solvent	M5PFPeA	269	50	0.185874	1	3.96322e+08	2.13221e+09	1.22644	45.4184	49.5809	54.1362	0.991619	1.00845	1.19194	FALSE	FALSE	4.48881e+09	3.70814e+09	1.39196e+09	23.7503	28.7504	76.5902	0.575008	1.73911	3.22481	FALSE	FALSE	7.64583e+09	4.1196e+09	1.15902e+09	13.9436	25.8789	91.9835	0.517577	1.93208	6.59682	FALSE	FALSE	9.41967	8.95121	8.46534	40.5629	119.285	365.142	2.3857	2.3857	9.00186	FALSE	FALSE
Solvent	M5PFPeA	269	50	0.185874	2	3.9335e+08	2.11622e+09	1.22644	45.0643	49.1819	53.6867	0.983638	1.01663	1.19133	FALSE	FALSE	4.48881e+09	3.70814e+09	1.39196e+09	23.5722	28.5348	76.0158	0.570696	1.75225	3.22481	FALSE	FALSE	7.64583e+09	4.1196e+09	1.15902e+09	13.8391	25.6848	91.2937	0.513696	1.94668	6.59682	FALSE	FALSE	9.41967	8.95121	8.46534	40.2587	118.39	362.404	2.36781	2.36781	9.00186	FALSE	FALSE
Solvent	M5PFPeA	269	50	0.185874	3	3.92763e+08	2.11306e+09	1.22644	44.9953	49.1031	53.597	0.982063	1.01826	1.19117	FALSE	FALSE	4.48881e+09	3.70814e+09	1.39196e+09	23.537	28.4922	75.9024	0.569844	1.75486	3.22481	FALSE	FALSE	7.64583e+09	4.1196e+09	1.15902e+09	13.8184	25.6465	91.1575	0.512929	1.94959	6.59682	FALSE	FALSE	9.41967	8.95121	8.46534	40.1987	118.214	361.863	2.36428	2.36428	9.00186	FALSE	FALSE
Solvent	M5PFPeA	269	100	0.371747	1	6.89524e+08	1.85482e+09	1.22644	81.1676	85.6862	90.4665	0.856862	1.16705	1.11457	FALSE	TRUE	4.48881e+09	3.70814e+09	1.39196e+09	41.321	50.0202	133.252	0.500202	1.99919	3.22481	FALSE	FALSE	7.64583e+09	4.1196e+09	1.15902e+09	24.2592	45.0243	160.034	0.450243	2.22102	6.59682	FALSE	FALSE	9.41967	8.95121	8.46534	70.5718	207.533	635.277	2.07533	2.07533	9.00186	FALSE	FALSE
Solvent	M5PFPeA	269	100	0.371747	2	7.76549e+08	2.08892e+09	1.22644	89.3922	97.6252	106.65	0.976252	1.02433	1.19306	FALSE	FALSE	4.48881e+09	3.70814e+09	1.39196e+09	46.5361	56.3332	150.07	0.563332	1.77515	3.22481	FALSE	FALSE	7.64583e+09	4.1196e+09	1.15902e+09	27.321	50.7068	180.231	0.507068	1.97212	6.59682	FALSE	FALSE	9.41967	8.95121	8.46534	79.4786	233.726	715.455	2.33726	2.33726	9.00186	FALSE	FALSE
Solvent	M5PFPeA	269	100	0.371747	3	7.67758e+08	2.06527e+09	1.22644	88.3617	96.4101	105.224	0.964101	1.03724	1.19083	FALSE	FALSE	4.48881e+09	3.70814e+09	1.39196e+09	46.0093	55.6955	148.371	0.556955	1.79548	3.22481	FALSE	FALSE	7.64583e+09	4.1196e+09	1.15902e+09	27.0117	50.1328	178.191	0.501328	1.9947	6.59682	FALSE	FALSE	9.41967	8.95121	8.46534	78.5789	231.08	707.356	2.3108	2.3108	9.00186	FALSE	FALSE
Solvent	M5PFPeA	269	250	0.929368	1	2.0404e+09	2.19547e+09	1.22644	238.559	260.835	285.328	1.04334	1.04334	1.19605	FALSE	FALSE	4.48881e+09	3.70814e+09	1.39196e+09	122.275	148.017	394.313	0.592068	1.689	3.22481	FALSE	FALSE	7.64583e+09	4.1196e+09	1.15902e+09	71.7866	133.233	473.563	0.532933	1.87641	6.59682	FALSE	FALSE	9.41967	8.95121	8.46534	208.832	614.12	1879.88	2.45648	2.45648	9.00186	FALSE	FALSE
Solvent	M5PFPeA	269	250	0.929368	2	2.01969e+09	2.17319e+09	1.22644	235.53	257.761	282.229	1.03104	1.03104	1.19827	FALSE	FALSE	4.48881e+09	3.70814e+09	1.39196e+09	121.034	146.515	390.311	0.586059	1.70631	3.22481	FALSE	FALSE	7.64583e+09	4.1196e+09	1.15902e+09	71.058	131.881	468.756	0.527524	1.89565	6.59682	FALSE	FALSE	9.41967	8.95121	8.46534	206.713	607.887	1860.8	2.43155	2.43155	9.00186	FALSE	FALSE
Solvent	M5PFPeA	269	250	0.929368	3	2.03374e+09	2.18831e+09	1.22644	237.575	259.845	284.341	1.03938	1.03938	1.19685	FALSE	FALSE	4.48881e+09	3.70814e+09	1.39196e+09	121.876	147.534	393.025	0.590135	1.69453	3.22481	FALSE	FALSE	7.64583e+09	4.1196e+09	1.15902e+09	71.5522	132.798	472.017	0.531194	1.88255	6.59682	FALSE	FALSE	9.41967	8.95121	8.46534	208.15	612.116	1873.74	2.44846	2.44846	9.00186	FALSE	FALSE
Solvent	M5PFHxA	318.997	0.5	0.00156741	1	6.03667e+06	3.85136e+09	1.59329	0.445216	0.489484	0.53784	0.978968	1.02148	1.20804	FALSE	FALSE	4.48788e+09	3.9328e+09	2.11449e+09	0.429084	0.489645	0.910708	0.97929	1.02115	2.12244	FALSE	FALSE	7.65646e+09	4.1184e+09	1.16124e+09	0.25151	0.467579	1.6583	0.935157	1.06934	6.59337	FALSE	FALSE	9.50837	9.05861	8.59769	0.597336	1.68255	4.86286	3.36511	3.36511	8.14092	TRUE	FALSE
Solvent	M5PFHxA	318.997	0.5	0.00156741	2	6.0631e+06	3.86822e+09	1.59329	0.447473	0.492055	0.540762	0.98411	1.01615	1.20848	FALSE	FALSE	4.48788e+09	3.9328e+09	2.11449e+09	0.430963	0.491789	0.914695	0.983578	1.0167	2.12244	FALSE	FALSE	7.65646e+09	4.1184e+09	1.16124e+09	0.252611	0.469626	1.66556	0.939251	1.06468	6.59337	FALSE	FALSE	9.50837	9.05861	8.59769	0.599951	1.68992	4.88415	3.37984	3.37984	8.14092	TRUE	FALSE
Solvent	M5PFHxA	318.997	0.5	0.00156741	3	6.16493e+06	3.93319e+09	1.59329	0.456432	0.501975	0.551741	1.00395	1.00395	1.20881	FALSE	FALSE	4.48788e+09	3.9328e+09	2.11449e+09	0.438201	0.500049	0.930058	1.0001	1.0001	2.12244	FALSE	FALSE	7.65646e+09	4.1184e+09	1.16124e+09	0.256854	0.477514	1.69353	0.955027	1.04709	6.59337	FALSE	FALSE	9.50837	9.05861	8.59769	0.610028	1.7183	4.96619	3.43661	3.43661	8.14092	TRUE	FALSE
Solvent	M5PFHxA	318.997	1	0.00313483	1	1.20403e+07	3.84081e+09	1.59329	0.904932	0.993023	1.08921	0.993023	1.00703	1.20364	FALSE	FALSE	4.48788e+09	3.9328e+09	2.11449e+09	0.855819	0.976609	1.81643	0.976609	1.02395	2.12244	FALSE	FALSE	7.65646e+09	4.1184e+09	1.16124e+09	0.501643	0.932597	3.30752	0.932597	1.07227	6.59337	FALSE	FALSE	9.50837	9.05861	8.59769	1.1914	3.35589	9.6991	3.35589	3.35589	8.14092	TRUE	FALSE
Solvent	M5PFHxA	318.997	1	0.00313483	2	1.1813e+07	3.7683e+09	1.59329	0.886084	0.971591	1.06488	0.971591	1.02924	1.20179	FALSE	FALSE	4.48788e+09	3.9328e+09	2.11449e+09	0.839662	0.958172	1.78214	0.958172	1.04365	2.12244	FALSE	FALSE	7.65646e+09	4.1184e+09	1.16124e+09	0.492172	0.91499	3.24507	0.91499	1.09291	6.59337	FALSE	FALSE	9.50837	9.05861	8.59769	1.16891	3.29254	9.51599	3.29254	3.29254	8.14092	TRUE	FALSE
Solvent	M5PFHxA	318.997	1	0.00313483	3	1.17478e+07	3.74751e+09	1.59329	0.880862	0.965452	1.05771	0.965452	1.03578	1.20076	FALSE	FALSE	4.48788e+09	3.9328e+09	2.11449e+09	0.835029	0.952885	1.7723	0.952885	1.04944	2.12244	FALSE	FALSE	7.65646e+09	4.1184e+09	1.16124e+09	0.489457	0.909942	3.22717	0.909942	1.09897	6.59337	FALSE	FALSE	9.50837	9.05861	8.59769	1.16246	3.27437	9.46349	3.27437	3.27437	8.14092	TRUE	FALSE
Solvent	M5PFHxA	318.997	5	0.0156741	1	6.0094e+07	3.83396e+09	1.59329	4.70075	5.1386	5.61642	1.02772	1.02772	1.19479	FALSE	FALSE	4.48788e+09	3.9328e+09	2.11449e+09	4.27146	4.87434	9.06594	0.974867	1.02578	2.12244	FALSE	FALSE	7.65646e+09	4.1184e+09	1.16124e+09	2.50374	4.65467	16.5081	0.930933	1.07419	6.59337	FALSE	FALSE	9.50837	9.05861	8.59769	5.94638	16.7495	48.409	3.34991	3.34991	8.14092	TRUE	FALSE
Solvent	M5PFHxA	318.997	5	0.0156741	2	6.04842e+07	3.85886e+09	1.59329	4.73599	5.17448	5.65276	1.0349	1.0349	1.19358	FALSE	FALSE	4.48788e+09	3.9328e+09	2.11449e+09	4.2992	4.90599	9.12481	0.981198	1.01916	2.12244	FALSE	FALSE	7.65646e+09	4.1184e+09	1.16124e+09	2.52	4.68489	16.6153	0.936979	1.06726	6.59337	FALSE	FALSE	9.50837	9.05861	8.59769	5.98499	16.8583	48.7233	3.37166	3.37166	8.14092	TRUE	FALSE
Solvent	M5PFHxA	318.997	5	0.0156741	3	6.18274e+07	3.94455e+09	1.59329	4.86181	5.29808	5.77274	1.05962	1.05962	1.18736	FALSE	FALSE	4.48788e+09	3.9328e+09	2.11449e+09	4.39467	5.01494	9.32745	1.00299	1.00299	2.12244	FALSE	FALSE	7.65646e+09	4.1184e+09	1.16124e+09	2.57596	4.78893	16.9843	0.957786	1.04407	6.59337	FALSE	FALSE	9.50837	9.05861	8.59769	6.1179	17.2327	49.8053	3.44653	3.44653	8.14092	TRUE	FALSE
Solvent	M5PFHxA	318.997	10	0.0313483	1	1.1451e+08	3.65283e+09	1.59329	9.06093	9.90856	10.835	0.990856	1.00923	1.1958	FALSE	FALSE	4.48788e+09	3.9328e+09	2.11449e+09	8.13933	9.28812	17.2753	0.928812	1.07664	2.12244	FALSE	FALSE	7.65646e+09	4.1184e+09	1.16124e+09	4.77091	8.86953	31.4564	0.886953	1.12746	6.59337	FALSE	FALSE	9.50837	9.05861	8.59769	11.3309	31.9165	92.244	3.19165	3.19165	8.14092	TRUE	FALSE
Solvent	M5PFHxA	318.997	10	0.0313483	2	1.18498e+08	3.78005e+09	1.59329	9.40516	10.2769	11.2291	1.02769	1.02769	1.19393	FALSE	FALSE	4.48788e+09	3.9328e+09	2.11449e+09	8.4228	9.61159	17.8769	0.961159	1.04041	2.12244	FALSE	FALSE	7.65646e+09	4.1184e+09	1.16124e+09	4.93707	9.17843	32.5519	0.917843	1.08951	6.59337	FALSE	FALSE	9.50837	9.05861	8.59769	11.7255	33.028	95.4566	3.3028	3.3028	8.14092	TRUE	FALSE
Solvent	M5PFHxA	318.997	10	0.0313483	3	1.17499e+08	3.74817e+09	1.59329	9.31613	10.1846	11.1335	1.01846	1.01846	1.19508	FALSE	FALSE	4.48788e+09	3.9328e+09	2.11449e+09	8.35177	9.53054	17.7262	0.953054	1.04926	2.12244	FALSE	FALSE	7.65646e+09	4.1184e+09	1.16124e+09	4.89544	9.10103	32.2774	0.910103	1.09878	6.59337	FALSE	FALSE	9.50837	9.05861	8.59769	11.6266	32.7495	94.6516	3.27495	3.27495	8.14092	TRUE	FALSE
Solvent	M5PFHxA	318.997	25	0.0783707	1	2.93326e+08	3.7428e+09	1.59329	23.7589	25.9461	28.3377	1.03784	1.03784	1.19272	FALSE	FALSE	4.48788e+09	3.9328e+09	2.11449e+09	20.8495	23.7922	44.2519	0.951687	1.05077	2.12244	FALSE	FALSE	7.65646e+09	4.1184e+09	1.16124e+09	12.221	22.72	80.5778	0.908798	1.10035	6.59337	FALSE	FALSE	9.50837	9.05861	8.59769	29.0249	81.7564	236.29	3.27025	3.27025	8.14092	TRUE	FALSE
Solvent	M5PFHxA	318.997	25	0.0783707	2	2.92706e+08	3.7349e+09	1.59329	23.7007	25.8874	28.2789	1.0355	1.0355	1.19317	FALSE	FALSE	4.48788e+09	3.9328e+09	2.11449e+09	20.8055	23.7419	44.1584	0.949678	1.05299	2.12244	FALSE	FALSE	7.65646e+09	4.1184e+09	1.16124e+09	12.1952	22.672	80.4077	0.906879	1.10268	6.59337	FALSE	FALSE	9.50837	9.05861	8.59769	28.9636	81.5837	235.791	3.26335	3.26335	8.14092	TRUE	FALSE
Solvent	M5PFHxA	318.997	25	0.0783707	3	2.9061e+08	3.70814e+09	1.59329	23.5061	25.6889	28.0774	1.02756	1.02756	1.19447	FALSE	FALSE	4.48788e+09	3.9328e+09	2.11449e+09	20.6564	23.5719	43.8421	0.942876	1.06059	2.12244	FALSE	FALSE	7.65646e+09	4.1184e+09	1.16124e+09	12.1079	22.5096	79.8317	0.900383	1.11064	6.59337	FALSE	FALSE	9.50837	9.05861	8.59769	28.7562	80.9994	234.102	3.23997	3.23997	8.14092	TRUE	FALSE
Solvent	M5PFHxA	318.997	50	0.156741	1	5.54352e+08	3.53673e+09	1.59329	45.3159	49.5899	54.2788	0.991797	1.00827	1.19779	FALSE	FALSE	4.48788e+09	3.9328e+09	2.11449e+09	39.4032	44.9645	83.631	0.899291	1.11199	2.12244	FALSE	FALSE	7.65646e+09	4.1184e+09	1.16124e+09	23.0964	42.9381	152.283	0.858763	1.16447	6.59337	FALSE	FALSE	9.50837	9.05861	8.59769	54.8538	154.51	446.561	3.0902	3.0902	8.14092	TRUE	FALSE
Solvent	M5PFHxA	318.997	50	0.156741	2	5.54956e+08	3.54059e+09	1.59329	45.3685	49.6485	54.3443	0.992971	1.00708	1.19784	FALSE	FALSE	4.48788e+09	3.9328e+09	2.11449e+09	39.4461	45.0135	83.7222	0.90027	1.11078	2.12244	FALSE	FALSE	7.65646e+09	4.1184e+09	1.16124e+09	23.1215	42.9849	152.449	0.859698	1.1632	6.59337	FALSE	FALSE	9.50837	9.05861	8.59769	54.9136	154.679	447.047	3.09357	3.09357	8.14092	TRUE	FALSE
Solvent	M5PFHxA	318.997	50	0.156741	3	5.45967e+08	3.48324e+09	1.59329	44.6017	48.7759	53.3522	0.975519	1.0251	1.19619	FALSE	FALSE	4.48788e+09	3.9328e+09	2.11449e+09	38.8072	44.2844	82.366	0.885688	1.12907	2.12244	FALSE	FALSE	7.65646e+09	4.1184e+09	1.16124e+09	22.747	42.2887	149.98	0.845773	1.18235	6.59337	FALSE	FALSE	9.50837	9.05861	8.59769	54.0241	152.173	439.806	3.04346	3.04346	8.14092	TRUE	FALSE
Solvent	M5PFHxA	318.997	100	0.313483	1	9.57346e+08	3.0539e+09	1.59329	80.8134	85.5982	90.6778	0.855982	1.16825	1.12206	FALSE	TRUE	4.48788e+09	3.9328e+09	2.11449e+09	68.0478	77.6521	144.428	0.776521	1.28779	2.12244	FALSE	FALSE	7.65646e+09	4.1184e+09	1.16124e+09	39.8866	74.1526	262.987	0.741526	1.34857	6.59337	FALSE	FALSE	9.50837	9.05861	8.59769	94.7306	266.834	771.194	2.66834	2.66834	8.14092	FALSE	FALSE
Solvent	M5PFHxA	318.997	100	0.313483	2	1.07349e+09	3.4244e+09	1.59329	88.8067	97.1997	106.421	0.971997	1.02881	1.19835	FALSE	FALSE	4.48788e+09	3.9328e+09	2.11449e+09	76.3033	87.0727	161.949	0.870727	1.14847	2.12244	FALSE	FALSE	7.65646e+09	4.1184e+09	1.16124e+09	44.7256	83.1486	294.892	0.831486	1.20267	6.59337	FALSE	FALSE	9.50837	9.05861	8.59769	106.223	299.205	864.754	2.99205	2.99205	8.14092	TRUE	FALSE
Solvent	M5PFHxA	318.997	100	0.313483	3	1.06341e+09	3.39224e+09	1.59329	87.9533	96.1846	105.22	0.961846	1.03967	1.19632	FALSE	FALSE	4.48788e+09	3.9328e+09	2.11449e+09	75.5867	86.255	160.429	0.86255	1.15935	2.12244	FALSE	FALSE	7.65646e+09	4.1184e+09	1.16124e+09	44.3055	82.3678	292.123	0.823678	1.21407	6.59337	FALSE	FALSE	9.50837	9.05861	8.59769	105.226	296.395	856.633	2.96395	2.96395	8.14092	TRUE	FALSE
Solvent	M5PFHxA	318.997	250	0.783707	1	2.82557e+09	3.60539e+09	1.59329	240.687	263.564	288.761	1.05426	1.05426	1.19974	FALSE	FALSE	4.48788e+09	3.9328e+09	2.11449e+09	200.841	229.187	426.273	0.916749	1.09081	2.12244	FALSE	FALSE	7.65646e+09	4.1184e+09	1.16124e+09	117.724	218.859	776.196	0.875434	1.14229	6.59337	FALSE	FALSE	9.50837	9.05861	8.59769	279.594	787.549	2276.15	3.1502	3.1502	8.14092	TRUE	FALSE
Solvent	M5PFHxA	318.997	250	0.783707	2	2.76668e+09	3.53025e+09	1.59329	234.307	257.117	282.294	1.02847	1.02847	1.2048	FALSE	FALSE	4.48788e+09	3.9328e+09	2.11449e+09	196.654	224.41	417.388	0.897641	1.11403	2.12244	FALSE	FALSE	7.65646e+09	4.1184e+09	1.16124e+09	115.27	214.297	760.018	0.857187	1.16661	6.59337	FALSE	FALSE	9.50837	9.05861	8.59769	273.766	771.134	2228.71	3.08454	3.08454	8.14092	TRUE	FALSE
Solvent	M5PFHxA	318.997	250	0.783707	3	2.75666e+09	3.51747e+09	1.59329	233.26	256.025	281.157	1.0241	1.0241	1.20534	FALSE	FALSE	4.48788e+09	3.9328e+09	2.11449e+09	195.943	223.598	415.878	0.894393	1.11808	2.12244	FALSE	FALSE	7.65646e+09	4.1184e+09	1.16124e+09	114.853	213.521	757.268	0.854085	1.17084	6.59337	FALSE	FALSE	9.50837	9.05861	8.59769	272.775	768.344	2220.64	3.07337	3.07337	8.14092	TRUE	FALSE
Solvent	M3PFBS	302.96	0.466	0.00153816	1	7.93781e+06	5.1606e+09	2.14144	0.388743	0.436512	0.489719	0.93672	1.06755	1.25975	FALSE	FALSE	8.92877e+09	6.09592e+09	1.00735e+09	0.269336	0.3945	2.38729	0.846567	1.18124	8.86362	FALSE	FALSE	7.65627e+09	4.03196e+09	1.16565e+09	0.314101	0.596444	2.06308	1.27992	1.27992	6.56822	FALSE	FALSE	9.84424	9.40261	8.96032	0.34423	0.95164	2.63494	2.04215	2.04215	7.65459	FALSE	FALSE
Solvent	M3PFBS	302.96	0.466	0.00153816	2	8.29324e+06	5.39168e+09	2.14144	0.409099	0.460868	0.518712	0.988988	1.01113	1.26794	FALSE	FALSE	8.92877e+09	6.09592e+09	1.00735e+09	0.281396	0.412165	2.49419	0.884474	1.13062	8.86362	FALSE	FALSE	7.65627e+09	4.03196e+09	1.16565e+09	0.328165	0.623151	2.15546	1.33723	1.33723	6.56822	FALSE	FALSE	9.84424	9.40261	8.96032	0.359644	0.994251	2.75292	2.13359	2.13359	7.65459	FALSE	FALSE
Solvent	M3PFBS	302.96	0.466	0.00153816	3	8.05921e+06	5.23953e+09	2.14144	0.395447	0.444812	0.499887	0.954531	1.04763	1.26411	FALSE	FALSE	8.92877e+09	6.09592e+09	1.00735e+09	0.273455	0.400534	2.4238	0.859514	1.16345	8.86362	FALSE	FALSE	7.65627e+09	4.03196e+09	1.16565e+09	0.318904	0.605566	2.09464	1.2995	1.2995	6.56822	FALSE	FALSE	9.84424	9.40261	8.96032	0.349495	0.966194	2.67524	2.07338	2.07338	7.65459	FALSE	FALSE
Solvent	M3PFBS	302.96	0.932	0.00307631	1	1.56504e+07	5.0874e+09	2.14144	0.800165	0.897984	1.00707	0.963503	1.03788	1.25858	FALSE	FALSE	8.92877e+09	6.09592e+09	1.00735e+09	0.531032	0.777809	4.70686	0.834559	1.19824	8.86362	FALSE	FALSE	7.65627e+09	4.03196e+09	1.16565e+09	0.619291	1.17597	4.06764	1.26177	1.26177	6.56822	FALSE	FALSE	9.84424	9.40261	8.96032	0.678695	1.87628	5.19513	2.01318	2.01318	7.65459	FALSE	FALSE
Solvent	M3PFBS	302.96	0.932	0.00307631	2	1.55834e+07	5.06563e+09	2.14144	0.79638	0.893439	1.00164	0.958625	1.04316	1.25775	FALSE	FALSE	8.92877e+09	6.09592e+09	1.00735e+09	0.528759	0.77448	4.68672	0.830987	1.20339	8.86362	FALSE	FALSE	7.65627e+09	4.03196e+09	1.16565e+09	0.61664	1.17093	4.05023	1.25637	1.25637	6.56822	FALSE	FALSE	9.84424	9.40261	8.96032	0.67579	1.86825	5.17289	2.00456	2.00456	7.65459	FALSE	FALSE
Solvent	M3PFBS	302.96	0.932	0.00307631	3	1.54506e+07	5.02245e+09	2.14144	0.788991	0.884433	0.990752	0.948963	1.05378	1.25572	FALSE	FALSE	8.92877e+09	6.09592e+09	1.00735e+09	0.524252	0.767879	4.64677	0.823904	1.21373	8.86362	FALSE	FALSE	7.65627e+09	4.03196e+09	1.16565e+09	0.611384	1.16095	4.01571	1.24566	1.24566	6.56822	FALSE	FALSE	9.84424	9.40261	8.96032	0.67003	1.85233	5.1288	1.98748	1.98748	7.65459	FALSE	FALSE
Solvent	M3PFBS	302.96	4.66	0.0153816	1	7.67346e+07	4.98874e+09	2.14144	4.31741	4.82621	5.39376	1.03567	1.03567	1.24931	FALSE	FALSE	8.92877e+09	6.09592e+09	1.00735e+09	2.60367	3.81363	23.0779	0.818375	1.22193	8.86362	FALSE	FALSE	7.65627e+09	4.03196e+09	1.16565e+09	3.03641	5.76582	19.9438	1.2373	1.2373	6.56822	FALSE	FALSE	9.84424	9.40261	8.96032	3.32766	9.19948	25.4719	1.97414	1.97414	7.65459	FALSE	FALSE
Solvent	M3PFBS	302.96	4.66	0.0153816	2	7.8447e+07	5.10007e+09	2.14144	4.43426	4.94584	5.51527	1.06134	1.06134	1.24379	FALSE	FALSE	8.92877e+09	6.09592e+09	1.00735e+09	2.66177	3.89873	23.5929	0.836637	1.19526	8.86362	FALSE	FALSE	7.65627e+09	4.03196e+09	1.16565e+09	3.10416	5.89448	20.3888	1.26491	1.26491	6.56822	FALSE	FALSE	9.84424	9.40261	8.96032	3.40192	9.40477	26.0403	2.01819	2.01819	7.65459	FALSE	FALSE
Solvent	M3PFBS	302.96	4.66	0.0153816	3	7.94113e+07	5.16276e+09	2.14144	4.50258	5.01331	5.58084	1.07582	1.07582	1.23948	FALSE	FALSE	8.92877e+09	6.09592e+09	1.00735e+09	2.69449	3.94665	23.8829	0.846921	1.18075	8.86362	FALSE	FALSE	7.65627e+09	4.03196e+09	1.16565e+09	3.14232	5.96694	20.6395	1.28046	1.28046	6.56822	FALSE	FALSE	9.84424	9.40261	8.96032	3.44374	9.52038	26.3604	2.043	2.043	7.65459	FALSE	FALSE
Solvent	M3PFBS	302.96	9.32	0.0307631	1	1.44737e+08	4.7049e+09	2.14144	8.41193	9.40838	10.5222	1.00948	1.00948	1.25087	FALSE	FALSE	8.92877e+09	6.09592e+09	1.00735e+09	4.91106	7.19329	43.5297	0.771812	1.29565	8.86362	FALSE	FALSE	7.65627e+09	4.03196e+09	1.16565e+09	5.72729	10.8755	37.6181	1.1669	1.1669	6.56822	FALSE	FALSE	9.84424	9.40261	8.96032	6.27667	17.3521	48.0453	1.86182	1.86182	7.65459	FALSE	FALSE
Solvent	M3PFBS	302.96	9.32	0.0307631	2	1.49532e+08	4.86074e+09	2.14144	8.73519	9.75191	10.8864	1.04634	1.04634	1.24627	FALSE	FALSE	8.92877e+09	6.09592e+09	1.00735e+09	5.07373	7.43155	44.9716	0.797377	1.25411	8.86362	FALSE	FALSE	7.65627e+09	4.03196e+09	1.16565e+09	5.91699	11.2358	38.8641	1.20555	1.20555	6.56822	FALSE	FALSE	9.84424	9.40261	8.96032	6.48456	17.9269	49.6367	1.92348	1.92348	7.65459	FALSE	FALSE
Solvent	M3PFBS	302.96	9.32	0.0307631	3	1.51102e+08	4.91178e+09	2.14144	8.84599	9.86464	11.0001	1.05844	1.05844	1.24351	FALSE	FALSE	8.92877e+09	6.09592e+09	1.00735e+09	5.127	7.50958	45.4438	0.805749	1.24108	8.86362	FALSE	FALSE	7.65627e+09	4.03196e+09	1.16565e+09	5.97912	11.3537	39.2722	1.21821	1.21821	6.56822	FALSE	FALSE	9.84424	9.40261	8.96032	6.55265	18.1151	50.1579	1.94368	1.94368	7.65459	FALSE	FALSE
Solvent	M3PFBS	302.96	23.3	0.0769078	1	3.68e+08	4.78495e+09	2.14144	22.7003	25.2439	28.0771	1.08343	1.08343	1.23686	FALSE	FALSE	8.92877e+09	6.09592e+09	1.00735e+09	12.4865	18.2892	110.676	0.784943	1.27398	8.86362	FALSE	FALSE	7.65627e+09	4.03196e+09	1.16565e+09	14.5618	27.6514	95.6453	1.18675	1.18675	6.56822	FALSE	FALSE	9.84424	9.40261	8.96032	15.9586	44.1183	122.157	1.89349	1.89349	7.65459	FALSE	FALSE
Solvent	M3PFBS	302.96	23.3	0.0769078	2	3.63116e+08	4.72145e+09	2.14144	22.3218	24.8736	27.7219	1.06754	1.06754	1.24192	FALSE	FALSE	8.92877e+09	6.09592e+09	1.00735e+09	12.3208	18.0465	109.207	0.774527	1.29111	8.86362	FALSE	FALSE	7.65627e+09	4.03196e+09	1.16565e+09	14.3686	27.2844	94.3761	1.17101	1.17101	6.56822	FALSE	FALSE	9.84424	9.40261	8.96032	15.7469	43.5329	120.536	1.86837	1.86837	7.65459	FALSE	FALSE
Solvent	M3PFBS	302.96	23.3	0.0769078	3	3.61785e+08	4.70414e+09	2.14144	22.2206	24.7728	27.6229	1.06321	1.06321	1.24312	FALSE	FALSE	8.92877e+09	6.09592e+09	1.00735e+09	12.2757	17.9803	108.807	0.771688	1.29586	8.86362	FALSE	FALSE	7.65627e+09	4.03196e+09	1.16565e+09	14.3159	27.1844	94.0301	1.16671	1.16671	6.56822	FALSE	FALSE	9.84424	9.40261	8.96032	15.6891	43.3733	120.094	1.86152	1.86152	7.65459	FALSE	FALSE
Solvent	M3PFBS	302.96	46.6	0.153816	1	6.75001e+08	4.38838e+09	2.14144	42.6638	47.74	53.4387	1.02446	1.02446	1.25255	FALSE	FALSE	8.92877e+09	6.09592e+09	1.00735e+09	22.9033	33.5468	203.006	0.719888	1.3891	8.86362	FALSE	FALSE	7.65627e+09	4.03196e+09	1.16565e+09	26.7099	50.7193	175.437	1.0884	1.0884	6.56822	FALSE	FALSE	9.84424	9.40261	8.96032	29.272	80.9238	224.065	1.73656	1.73656	7.65459	FALSE	FALSE
Solvent	M3PFBS	302.96	46.6	0.153816	2	6.6832e+08	4.34494e+09	2.14144	42.1757	47.2101	52.8639	1.01309	1.01309	1.25342	FALSE	FALSE	8.92877e+09	6.09592e+09	1.00735e+09	22.6766	33.2147	200.997	0.712763	1.40299	8.86362	FALSE	FALSE	7.65627e+09	4.03196e+09	1.16565e+09	26.4455	50.2173	173.7	1.07762	1.07762	6.56822	FALSE	FALSE	9.84424	9.40261	8.96032	28.9823	80.1228	221.847	1.71937	1.71937	7.65459	FALSE	FALSE
Solvent	M3PFBS	302.96	46.6	0.153816	3	6.59103e+08	4.28502e+09	2.14144	41.5197	46.4805	52.052	0.997436	1.00257	1.25367	FALSE	FALSE	8.92877e+09	6.09592e+09	1.00735e+09	22.3639	32.7567	198.225	0.702933	1.42261	8.86362	FALSE	FALSE	7.65627e+09	4.03196e+09	1.16565e+09	26.0808	49.5247	171.305	1.06276	1.06276	6.56822	FALSE	FALSE	9.84424	9.40261	8.96032	28.5826	79.0178	218.788	1.69566	1.69566	7.65459	FALSE	FALSE
Solvent	M3PFBS	302.96	93.2	0.307631	1	1.12836e+09	3.66789e+09	2.14144	73.7156	81.0107	89.0582	0.869213	1.15047	1.20813	FALSE	TRUE	8.92877e+09	6.09592e+09	1.00735e+09	38.2861	56.0781	339.353	0.601697	1.66197	8.86362	FALSE	FALSE	7.65627e+09	4.03196e+09	1.16565e+09	44.6494	84.7845	293.267	0.909705	1.09926	6.56822	FALSE	FALSE	9.84424	9.40261	8.96032	48.9322	135.275	374.556	1.45145	1.45145	7.65459	FALSE	FALSE
Solvent	M3PFBS	302.96	93.2	0.307631	2	1.24766e+09	4.05569e+09	2.14144	81.1446	90.9025	101.887	0.975349	1.02527	1.25563	FALSE	FALSE	8.92877e+09	6.09592e+09	1.00735e+09	42.334	62.0072	375.232	0.665313	1.50305	8.86362	FALSE	FALSE	7.65627e+09	4.03196e+09	1.16565e+09	49.37	93.7485	324.273	1.00589	1.00589	6.56822	FALSE	FALSE	9.84424	9.40261	8.96032	54.1057	149.578	414.157	1.60491	1.60491	7.65459	FALSE	FALSE
Solvent	M3PFBS	302.96	93.2	0.307631	3	1.23004e+09	3.99841e+09	2.14144	79.9136	89.4294	100.129	0.959543	1.04216	1.25297	FALSE	FALSE	8.92877e+09	6.09592e+09	1.00735e+09	41.7361	61.1314	369.933	0.655916	1.52459	8.86362	FALSE	FALSE	7.65627e+09	4.03196e+09	1.16565e+09	48.6727	92.4245	319.694	0.991679	1.00839	6.56822	FALSE	FALSE	9.84424	9.40261	8.96032	53.3415	147.465	408.308	1.58224	1.58224	7.65459	FALSE	FALSE
Solvent	M3PFBS	302.96	233	0.769078	1	2.98088e+09	3.87591e+09	2.14144	202.437	227.425	255.702	0.976071	1.02452	1.26312	FALSE	FALSE	8.92877e+09	6.09592e+09	1.00735e+09	101.144	148.146	896.497	0.635821	1.57277	8.86362	FALSE	FALSE	7.65627e+09	4.03196e+09	1.16565e+09	117.954	223.982	774.748	0.961296	1.04026	6.56822	FALSE	FALSE	9.84424	9.40261	8.96032	129.268	357.368	989.496	1.53377	1.53377	7.65459	FALSE	FALSE
Solvent	M3PFBS	302.96	233	0.769078	2	2.96521e+09	3.85554e+09	2.14144	201.221	225.98	253.988	0.969873	1.03106	1.26223	FALSE	FALSE	8.92877e+09	6.09592e+09	1.00735e+09	100.612	147.368	891.786	0.632479	1.58108	8.86362	FALSE	FALSE	7.65627e+09	4.03196e+09	1.16565e+09	117.334	222.805	770.676	0.956244	1.04576	6.56822	FALSE	FALSE	9.84424	9.40261	8.96032	128.589	355.49	984.296	1.52571	1.52571	7.65459	FALSE	FALSE
Solvent	M3PFBS	302.96	233	0.769078	3	2.93846e+09	3.82076e+09	2.14144	199.183	223.519	251.026	0.959311	1.04242	1.26028	FALSE	FALSE	8.92877e+09	6.09592e+09	1.00735e+09	99.7042	146.038	883.74	0.626773	1.59547	8.86362	FALSE	FALSE	7.65627e+09	4.03196e+09	1.16565e+09	116.275	220.795	763.723	0.947617	1.05528	6.56822	FALSE	FALSE	9.84424	9.40261	8.96032	127.429	352.283	975.415	1.51194	1.51194	7.65459	FALSE	FALSE
Solvent	M4PFHpA	367.99	0.5	0.00135873	1	6.2321e+06	4.58671e+09	1.79816	0.452921	0.499309	0.55011	0.998619	1.00138	1.21458	FALSE	FALSE	4.92013e+09	3.94455e+09	3.47203e+09	0.466116	0.581398	0.660522	1.1628	1.1628	1.41708	FALSE	FALSE	7.65624e+09	4.03535e+09	1.1639e+09	0.29954	0.568316	1.97041	1.13663	1.13663	6.57811	FALSE	FALSE	9.75278	9.27583	8.79537	0.405219	1.21518	3.67364	2.43036	2.43036	9.06583	FALSE	FALSE
Solvent	M4PFHpA	367.99	0.5	0.00135873	2	6.12978e+06	4.5114e+09	1.79816	0.444144	0.48946	0.539068	0.97892	1.02153	1.21372	FALSE	FALSE	4.92013e+09	3.94455e+09	3.47203e+09	0.458464	0.571852	0.649678	1.1437	1.1437	1.41708	FALSE	FALSE	7.65624e+09	4.03535e+09	1.1639e+09	0.294622	0.558985	1.93806	1.11797	1.11797	6.57811	FALSE	FALSE	9.75278	9.27583	8.79537	0.398566	1.19523	3.61333	2.39046	2.39046	9.06583	FALSE	FALSE
Solvent	M4PFHpA	367.99	0.5	0.00135873	3	6.19085e+06	4.55635e+09	1.79816	0.449335	0.495336	0.54571	0.990672	1.00942	1.21448	FALSE	FALSE	4.92013e+09	3.94455e+09	3.47203e+09	0.463031	0.577549	0.65615	1.1551	1.1551	1.41708	FALSE	FALSE	7.65624e+09	4.03535e+09	1.1639e+09	0.297557	0.564554	1.95737	1.12911	1.12911	6.57811	FALSE	FALSE	9.75278	9.27583	8.79537	0.402537	1.20714	3.64933	2.41427	2.41427	9.06583	FALSE	FALSE
Solvent	M4PFHpA	367.99	1	0.00271746	1	1.21678e+07	4.47763e+09	1.79816	0.900752	0.990674	1.08907	0.990674	1.00941	1.20907	FALSE	FALSE	4.92013e+09	3.94455e+09	3.47203e+09	0.910063	1.13514	1.28963	1.13514	1.13514	1.41708	FALSE	FALSE	7.65624e+09	4.03535e+09	1.1639e+09	0.584833	1.1096	3.8471	1.1096	1.1096	6.57811	FALSE	FALSE	9.75278	9.27583	8.79537	0.791164	2.37256	7.17256	2.37256	2.37256	9.06583	FALSE	FALSE
Solvent	M4PFHpA	367.99	1	0.00271746	2	1.18864e+07	4.37407e+09	1.79816	0.877909	0.964379	1.05888	0.964379	1.03694	1.20614	FALSE	FALSE	4.92013e+09	3.94455e+09	3.47203e+09	0.889015	1.10889	1.2598	1.10889	1.10889	1.41708	FALSE	FALSE	7.65624e+09	4.03535e+09	1.1639e+09	0.571307	1.08394	3.75812	1.08394	1.08394	6.57811	FALSE	FALSE	9.75278	9.27583	8.79537	0.772866	2.31769	7.00667	2.31769	2.31769	9.06583	FALSE	FALSE
Solvent	M4PFHpA	367.99	1	0.00271746	3	1.19739e+07	4.40627e+09	1.79816	0.884857	0.97255	1.06844	0.97255	1.02822	1.20748	FALSE	FALSE	4.92013e+09	3.94455e+09	3.47203e+09	0.895561	1.11705	1.26908	1.11705	1.11705	1.41708	FALSE	FALSE	7.65624e+09	4.03535e+09	1.1639e+09	0.575514	1.09192	3.78579	1.09192	1.09192	6.57811	FALSE	FALSE	9.75278	9.27583	8.79537	0.778556	2.33475	7.05826	2.33475	2.33475	9.06583	FALSE	FALSE
Solvent	M4PFHpA	367.99	5	0.0135873	1	6.05875e+07	4.45913e+09	1.79816	4.70103	5.14967	5.64026	1.02993	1.02993	1.19979	FALSE	FALSE	4.92013e+09	3.94455e+09	3.47203e+09	4.53151	5.65226	6.4215	1.13045	1.13045	1.41708	FALSE	FALSE	7.65624e+09	4.03535e+09	1.1639e+09	2.91208	5.52508	19.156	1.10502	1.10502	6.57811	FALSE	FALSE	9.75278	9.27583	8.79537	3.93948	11.8138	35.7146	2.36276	2.36276	9.06583	FALSE	FALSE
Solvent	M4PFHpA	367.99	5	0.0135873	2	6.05448e+07	4.45598e+09	1.79816	4.69721	5.14575	5.63626	1.02915	1.02915	1.19992	FALSE	FALSE	4.92013e+09	3.94455e+09	3.47203e+09	4.52832	5.64828	6.41697	1.12966	1.12966	1.41708	FALSE	FALSE	7.65624e+09	4.03535e+09	1.1639e+09	2.91003	5.52119	19.1425	1.10424	1.10424	6.57811	FALSE	FALSE	9.75278	9.27583	8.79537	3.9367	11.8055	35.6894	2.36109	2.36109	9.06583	FALSE	FALSE
Solvent	M4PFHpA	367.99	5	0.0135873	3	6.19418e+07	4.55879e+09	1.79816	4.82565	5.27399	5.76318	1.0548	1.0548	1.19428	FALSE	FALSE	4.92013e+09	3.94455e+09	3.47203e+09	4.6328	5.7786	6.56503	1.15572	1.15572	1.41708	FALSE	FALSE	7.65624e+09	4.03535e+09	1.1639e+09	2.97717	5.64858	19.5842	1.12972	1.12972	6.57811	FALSE	FALSE	9.75278	9.27583	8.79537	4.02753	12.0779	36.5129	2.41557	2.41557	9.06583	FALSE	FALSE
Solvent	M4PFHpA	367.99	10	0.0271746	1	1.145e+08	4.21349e+09	1.79816	9.00609	9.86937	10.8149	0.986937	1.01324	1.20084	FALSE	FALSE	4.92013e+09	3.94455e+09	3.47203e+09	8.56378	10.6818	12.1355	1.06818	1.06818	1.41708	FALSE	FALSE	7.65624e+09	4.03535e+09	1.1639e+09	5.50334	10.4414	36.2016	1.04414	1.04414	6.57811	FALSE	FALSE	9.75278	9.27583	8.79537	7.44493	22.326	67.4944	2.2326	2.2326	9.06583	FALSE	FALSE
Solvent	M4PFHpA	367.99	10	0.0271746	2	1.18461e+08	4.35926e+09	1.79816	9.34412	10.2353	11.2111	1.02353	1.02353	1.19981	FALSE	FALSE	4.92013e+09	3.94455e+09	3.47203e+09	8.86006	11.0513	12.5554	1.10513	1.10513	1.41708	FALSE	FALSE	7.65624e+09	4.03535e+09	1.1639e+09	5.69373	10.8027	37.454	1.08027	1.08027	6.57811	FALSE	FALSE	9.75278	9.27583	8.79537	7.7025	23.0984	69.8295	2.30984	2.30984	9.06583	FALSE	FALSE
Solvent	M4PFHpA	367.99	10	0.0271746	3	1.1895e+08	4.37726e+09	1.79816	9.38783	10.2806	11.2578	1.02806	1.02806	1.19919	FALSE	FALSE	4.92013e+09	3.94455e+09	3.47203e+09	8.89663	11.097	12.6072	1.1097	1.1097	1.41708	FALSE	FALSE	7.65624e+09	4.03535e+09	1.1639e+09	5.71724	10.8473	37.6086	1.08473	1.08473	6.57811	FALSE	FALSE	9.75278	9.27583	8.79537	7.7343	23.1938	70.1178	2.31938	2.31938	9.06583	FALSE	FALSE
Solvent	M4PFHpA	367.99	25	0.0679366	1	2.95539e+08	4.35022e+09	1.79816	23.9199	26.1605	28.6142	1.04642	1.04642	1.19625	FALSE	FALSE	4.92013e+09	3.94455e+09	3.47203e+09	22.1042	27.5711	31.3234	1.10284	1.10284	1.41708	FALSE	FALSE	7.65624e+09	4.03535e+09	1.1639e+09	14.2048	26.9507	93.4409	1.07803	1.07803	6.57811	FALSE	FALSE	9.75278	9.27583	8.79537	19.2163	57.6264	174.212	2.30506	2.30506	9.06583	FALSE	FALSE
Solvent	M4PFHpA	367.99	25	0.0679366	2	2.93266e+08	4.31676e+09	1.79816	23.7038	25.9442	28.3995	1.03777	1.03777	1.1981	FALSE	FALSE	4.92013e+09	3.94455e+09	3.47203e+09	21.9342	27.359	31.0824	1.09436	1.09436	1.41708	FALSE	FALSE	7.65624e+09	4.03535e+09	1.1639e+09	14.0955	26.7434	92.7221	1.06974	1.06974	6.57811	FALSE	FALSE	9.75278	9.27583	8.79537	19.0685	57.1831	172.872	2.28732	2.28732	9.06583	FALSE	FALSE
Solvent	M4PFHpA	367.99	25	0.0679366	3	2.91797e+08	4.29514e+09	1.79816	23.5663	25.8045	28.2583	1.03218	1.03218	1.1991	FALSE	FALSE	4.92013e+09	3.94455e+09	3.47203e+09	21.8243	27.222	30.9267	1.08888	1.08888	1.41708	FALSE	FALSE	7.65624e+09	4.03535e+09	1.1639e+09	14.0249	26.6094	92.2577	1.06438	1.06438	6.57811	FALSE	FALSE	9.75278	9.27583	8.79537	18.973	56.8966	172.006	2.27587	2.27587	9.06583	FALSE	FALSE
Solvent	M4PFHpA	367.99	50	0.135873	1	5.53599e+08	4.07438e+09	1.79816	45.2791	49.6609	54.4794	0.993219	1.00683	1.20319	FALSE	FALSE	4.92013e+09	3.94455e+09	3.47203e+09	41.4052	51.6457	58.6743	1.03291	1.03291	1.41708	FALSE	FALSE	7.65624e+09	4.03535e+09	1.1639e+09	26.6082	50.4836	175.032	1.00967	1.00967	6.57811	FALSE	FALSE	9.75278	9.27583	8.79537	35.9957	107.945	326.33	2.15889	2.15889	9.06583	FALSE	FALSE
Solvent	M4PFHpA	367.99	50	0.135873	2	5.52634e+08	4.06728e+09	1.79816	45.1948	49.5666	54.3738	0.991332	1.00874	1.2031	FALSE	FALSE	4.92013e+09	3.94455e+09	3.47203e+09	41.3331	51.5557	58.5721	1.03111	1.03111	1.41708	FALSE	FALSE	7.65624e+09	4.03535e+09	1.1639e+09	26.5618	50.3956	174.727	1.00791	1.00791	6.57811	FALSE	FALSE	9.75278	9.27583	8.79537	35.9329	107.757	325.762	2.15513	2.15513	9.06583	FALSE	FALSE
Solvent	M4PFHpA	367.99	50	0.135873	3	5.46775e+08	4.02415e+09	1.79816	44.6907	48.9939	53.7237	0.979879	1.02053	1.20212	FALSE	FALSE	4.92013e+09	3.94455e+09	3.47203e+09	40.8948	51.009	57.9511	1.02018	1.02018	1.41708	FALSE	FALSE	7.65624e+09	4.03535e+09	1.1639e+09	26.2802	49.8613	172.874	0.997226	1.00278	6.57811	FALSE	FALSE	9.75278	9.27583	8.79537	35.5519	106.614	322.308	2.13228	2.13228	9.06583	FALSE	FALSE
Solvent	M4PFHpA	367.99	100	0.271746	1	9.48324e+08	3.48974e+09	1.79816	80.3466	85.1602	90.2739	0.851602	1.17426	1.12356	FALSE	TRUE	4.92013e+09	3.94455e+09	3.47203e+09	70.9279	88.4699	100.51	0.884699	1.13033	1.41708	FALSE	FALSE	7.65624e+09	4.03535e+09	1.1639e+09	45.5803	86.4793	299.833	0.864793	1.15635	6.57811	FALSE	FALSE	9.75278	9.27583	8.79537	61.6612	184.911	559.01	1.84911	1.84911	9.06583	FALSE	FALSE
Solvent	M4PFHpA	367.99	100	0.271746	2	1.06256e+09	3.91011e+09	1.79816	88.155	96.6661	106.035	0.966661	1.03449	1.20283	FALSE	FALSE	4.92013e+09	3.94455e+09	3.47203e+09	79.4716	99.1268	112.617	0.991268	1.00881	1.41708	FALSE	FALSE	7.65624e+09	4.03535e+09	1.1639e+09	51.0708	96.8963	335.949	0.968963	1.03203	6.57811	FALSE	FALSE	9.75278	9.27583	8.79537	69.0887	207.185	626.346	2.07185	2.07185	9.06583	FALSE	FALSE
Solvent	M4PFHpA	367.99	100	0.271746	3	1.05873e+09	3.89603e+09	1.79816	87.8302	96.2775	105.573	0.962775	1.03866	1.20201	FALSE	FALSE	4.92013e+09	3.94455e+09	3.47203e+09	79.1856	98.77	112.212	0.9877	1.01245	1.41708	FALSE	FALSE	7.65624e+09	4.03535e+09	1.1639e+09	50.887	96.5476	334.74	0.965476	1.03576	6.57811	FALSE	FALSE	9.75278	9.27583	8.79537	68.8401	206.439	624.092	2.06439	2.06439	9.06583	FALSE	FALSE
Solvent	M4PFHpA	367.99	250	0.679366	1	2.7979e+09	4.1184e+09	1.79816	239.903	263.355	289.252	1.05342	1.05342	1.2057	FALSE	FALSE	4.92013e+09	3.94455e+09	3.47203e+09	209.263	261.019	296.542	1.04407	1.04407	1.41708	FALSE	FALSE	7.65624e+09	4.03535e+09	1.1639e+09	134.479	255.146	884.616	1.02058	1.02058	6.57811	FALSE	FALSE	9.75278	9.27583	8.79537	181.923	545.555	1649.28	2.18222	2.18222	9.06583	FALSE	FALSE
Solvent	M4PFHpA	367.99	250	0.679366	2	2.73918e+09	4.03196e+09	1.79816	233.501	256.843	282.671	1.02737	1.02737	1.21058	FALSE	FALSE	4.92013e+09	3.94455e+09	3.47203e+09	204.871	255.54	290.317	1.02216	1.02216	1.41708	FALSE	FALSE	7.65624e+09	4.03535e+09	1.1639e+09	131.656	249.79	866.048	0.999161	1.00084	6.57811	FALSE	FALSE	9.75278	9.27583	8.79537	178.105	534.104	1614.67	2.13642	2.13642	9.06583	FALSE	FALSE
Solvent	M4PFHpA	367.99	250	0.679366	3	2.73104e+09	4.01998e+09	1.79816	232.643	255.943	281.729	1.02377	1.02377	1.21099	FALSE	FALSE	4.92013e+09	3.94455e+09	3.47203e+09	204.262	254.781	289.455	1.01912	1.01912	1.41708	FALSE	FALSE	7.65624e+09	4.03535e+09	1.1639e+09	131.265	249.048	863.475	0.996192	1.00382	6.57811	FALSE	FALSE	9.75278	9.27583	8.79537	177.575	532.517	1609.87	2.13007	2.13007	9.06583	FALSE	FALSE
Solvent	M8PFOA	422	0.5	0.00118483	1	4.62067e+06	3.89985e+09	2.04265	0.445232	0.486745	0.531853	0.97349	1.02723	1.19455	FALSE	FALSE	4.92359e+09	4.31676e+09	3.47668e+09	0.396037	0.45171	0.560858	0.90342	1.1069	1.41617	FALSE	FALSE	7.65724e+09	4.09467e+09	1.16582e+09	0.254651	0.47621	1.67257	0.95242	1.04996	6.5681	FALSE	FALSE	9.87482	9.39856	8.91926	0.260132	0.778858	2.3483	1.55772	1.55772	9.02734	FALSE	FALSE
Solvent	M8PFOA	422	0.5	0.00118483	2	4.7772e+06	4.03196e+09	2.04265	0.462796	0.506166	0.553313	1.01233	1.01233	1.19559	FALSE	FALSE	4.92359e+09	4.31676e+09	3.47668e+09	0.409454	0.467013	0.579858	0.934026	1.07063	1.41617	FALSE	FALSE	7.65724e+09	4.09467e+09	1.16582e+09	0.263278	0.492343	1.72923	0.984686	1.01555	6.5681	FALSE	FALSE	9.87482	9.39856	8.91926	0.268945	0.805243	2.42786	1.61049	1.61049	9.02734	FALSE	FALSE
Solvent	M8PFOA	422	0.5	0.00118483	3	4.82443e+06	4.07183e+09	2.04265	0.468424	0.512038	0.559428	1.02408	1.02408	1.19428	FALSE	FALSE	4.92359e+09	4.31676e+09	3.47668e+09	0.413502	0.47163	0.585591	0.94326	1.06015	1.41617	FALSE	FALSE	7.65724e+09	4.09467e+09	1.16582e+09	0.265881	0.49721	1.74633	0.994421	1.00561	6.5681	FALSE	FALSE	9.87482	9.39856	8.91926	0.271604	0.813204	2.45186	1.62641	1.62641	9.02734	FALSE	FALSE
Solvent	M8PFOA	422	1	0.00236967	1	9.26931e+06	3.91165e+09	2.04265	0.896724	0.978479	1.06727	0.978479	1.02199	1.19019	FALSE	FALSE	4.92359e+09	4.31676e+09	3.47668e+09	0.794472	0.906155	1.12511	0.906155	1.10356	1.41617	FALSE	FALSE	7.65724e+09	4.09467e+09	1.16582e+09	0.510843	0.955303	3.35527	0.955303	1.04679	6.5681	FALSE	FALSE	9.87482	9.39856	8.91926	0.52184	1.56243	4.71083	1.56243	1.56243	9.02734	FALSE	FALSE
Solvent	M8PFOA	422	1	0.00236967	2	9.30764e+06	3.92783e+09	2.04265	0.900712	0.983021	1.07243	0.983021	1.01727	1.19065	FALSE	FALSE	4.92359e+09	4.31676e+09	3.47668e+09	0.797758	0.909903	1.12976	0.909903	1.09902	1.41617	FALSE	FALSE	7.65724e+09	4.09467e+09	1.16582e+09	0.512956	0.959254	3.36915	0.959254	1.04248	6.5681	FALSE	FALSE	9.87482	9.39856	8.91926	0.523998	1.56889	4.73031	1.56889	1.56889	9.02734	FALSE	FALSE
Solvent	M8PFOA	422	1	0.00236967	3	9.25015e+06	3.90357e+09	2.04265	0.894748	0.97621	1.06467	0.97621	1.02437	1.18991	FALSE	FALSE	4.92359e+09	4.31676e+09	3.47668e+09	0.79283	0.904282	1.12279	0.904282	1.10585	1.41617	FALSE	FALSE	7.65724e+09	4.09467e+09	1.16582e+09	0.509787	0.953329	3.34834	0.953329	1.04896	6.5681	FALSE	FALSE	9.87482	9.39856	8.91926	0.520761	1.5592	4.70109	1.5592	1.5592	9.02734	FALSE	FALSE
Solvent	M8PFOA	422	5	0.0118483	1	4.85235e+07	4.09539e+09	2.04265	4.73319	5.14724	5.59679	1.02945	1.02945	1.18246	FALSE	FALSE	4.92359e+09	4.31676e+09	3.47668e+09	4.15895	4.7436	5.8898	0.948719	1.05405	1.41617	FALSE	FALSE	7.65724e+09	4.09467e+09	1.16582e+09	2.67419	5.00088	17.5644	1.00018	1.00018	6.5681	FALSE	FALSE	9.87482	9.39856	8.91926	2.73176	8.17911	24.6605	1.63582	1.63582	9.02734	FALSE	FALSE
Solvent	M8PFOA	422	5	0.0118483	2	4.83245e+07	4.07859e+09	2.04265	4.71136	5.125	5.57424	1.025	1.025	1.18315	FALSE	FALSE	4.92359e+09	4.31676e+09	3.47668e+09	4.14189	4.72414	5.86564	0.944828	1.05839	1.41617	FALSE	FALSE	7.65724e+09	4.09467e+09	1.16582e+09	2.66323	4.98037	17.4923	0.996074	1.00394	6.5681	FALSE	FALSE	9.87482	9.39856	8.91926	2.72055	8.14556	24.5594	1.62911	1.62911	9.02734	FALSE	FALSE
Solvent	M8PFOA	422	5	0.0118483	3	4.88104e+07	4.1196e+09	2.04265	4.76506	5.1793	5.62884	1.03586	1.03586	1.18127	FALSE	FALSE	4.92359e+09	4.31676e+09	3.47668e+09	4.18354	4.77164	5.92462	0.954328	1.04786	1.41617	FALSE	FALSE	7.65724e+09	4.09467e+09	1.16582e+09	2.69	5.03044	17.6682	1.00609	1.00609	6.5681	FALSE	FALSE	9.87482	9.39856	8.91926	2.74791	8.22746	24.8063	1.64549	1.64549	9.02734	FALSE	FALSE
Solvent	M8PFOA	422	10	0.0236967	1	9.10405e+07	3.84191e+09	2.04265	8.86636	9.63178	10.4629	0.963178	1.03823	1.18006	FALSE	FALSE	4.92359e+09	4.31676e+09	3.47668e+09	7.80308	8.9	11.0505	0.89	1.1236	1.41617	FALSE	FALSE	7.65724e+09	4.09467e+09	1.16582e+09	5.01736	9.38272	32.9545	0.938272	1.06579	6.5681	FALSE	FALSE	9.87482	9.39856	8.91926	5.12536	15.3458	46.2684	1.53458	1.53458	9.02734	FALSE	FALSE
Solvent	M8PFOA	422	10	0.0236967	2	9.61663e+07	4.05822e+09	2.04265	9.37709	10.1991	11.0929	1.01991	1.01991	1.18298	FALSE	FALSE	4.92359e+09	4.31676e+09	3.47668e+09	8.24241	9.40109	11.6727	0.940109	1.06371	1.41617	FALSE	FALSE	7.65724e+09	4.09467e+09	1.16582e+09	5.29985	9.91099	34.8099	0.991099	1.00898	6.5681	FALSE	FALSE	9.87482	9.39856	8.91926	5.41393	16.2098	48.8734	1.62098	1.62098	9.02734	FALSE	FALSE
Solvent	M8PFOA	422	10	0.0236967	3	9.46844e+07	3.99568e+09	2.04265	9.22184	10.035	10.9194	1.0035	1.0035	1.18408	FALSE	FALSE	4.92359e+09	4.31676e+09	3.47668e+09	8.11539	9.25622	11.4928	0.925622	1.08036	1.41617	FALSE	FALSE	7.65724e+09	4.09467e+09	1.16582e+09	5.21818	9.75826	34.2735	0.975826	1.02477	6.5681	FALSE	FALSE	9.87482	9.39856	8.91926	5.3305	15.96	48.1203	1.596	1.596	9.02734	FALSE	FALSE
Solvent	M8PFOA	422	25	0.0592416	1	2.42354e+08	4.09095e+09	2.04265	23.6672	25.7316	27.9788	1.02927	1.02927	1.18218	FALSE	FALSE	4.92359e+09	4.31676e+09	3.47668e+09	20.7722	23.6922	29.417	0.947689	1.0552	1.41617	FALSE	FALSE	7.65724e+09	4.09467e+09	1.16582e+09	13.3565	24.9773	87.7266	0.999091	1.00091	6.5681	FALSE	FALSE	9.87482	9.39856	8.91926	13.644	40.8511	123.169	1.63405	1.63405	9.02734	FALSE	FALSE
Solvent	M8PFOA	422	25	0.0592416	2	2.43976e+08	4.11831e+09	2.04265	23.8465	25.9123	28.1597	1.03649	1.03649	1.18087	FALSE	FALSE	4.92359e+09	4.31676e+09	3.47668e+09	20.9111	23.8507	29.6138	0.954029	1.04819	1.41617	FALSE	FALSE	7.65724e+09	4.09467e+09	1.16582e+09	13.4458	25.1444	88.3134	1.00577	1.00577	6.5681	FALSE	FALSE	9.87482	9.39856	8.91926	13.7352	41.1244	123.993	1.64498	1.64498	9.02734	FALSE	FALSE
Solvent	M8PFOA	422	25	0.0592416	3	2.4157e+08	4.07771e+09	2.04265	23.5816	25.6443	27.8901	1.02577	1.02577	1.1827	FALSE	FALSE	4.92359e+09	4.31676e+09	3.47668e+09	20.705	23.6156	29.3219	0.944623	1.05862	1.41617	FALSE	FALSE	7.65724e+09	4.09467e+09	1.16582e+09	13.3132	24.8965	87.4427	0.995858	1.00416	6.5681	FALSE	FALSE	9.87482	9.39856	8.91926	13.5998	40.719	122.77	1.62876	1.62876	9.02734	FALSE	FALSE
Solvent	M8PFOA	422	50	0.118483	1	4.66618e+08	3.93826e+09	2.04265	45.4336	49.4657	53.8662	0.989315	1.0108	1.1856	FALSE	FALSE	4.92359e+09	4.31676e+09	3.47668e+09	39.9939	45.616	56.6383	0.91232	1.09611	1.41617	FALSE	FALSE	7.65724e+09	4.09467e+09	1.16582e+09	25.7159	48.0901	168.905	0.961803	1.03971	6.5681	FALSE	FALSE	9.87482	9.39856	8.91926	26.2695	78.653	237.144	1.57306	1.57306	9.02734	FALSE	FALSE
Solvent	M8PFOA	422	50	0.118483	2	4.65971e+08	3.9328e+09	2.04265	45.3686	49.3927	53.7843	0.987855	1.01229	1.1855	FALSE	FALSE	4.92359e+09	4.31676e+09	3.47668e+09	39.9384	45.5527	56.5597	0.911055	1.09763	1.41617	FALSE	FALSE	7.65724e+09	4.09467e+09	1.16582e+09	25.6803	48.0234	168.671	0.960469	1.04116	6.5681	FALSE	FALSE	9.87482	9.39856	8.91926	26.2331	78.5439	236.815	1.57088	1.57088	9.02734	FALSE	FALSE
Solvent	M8PFOA	422	50	0.118483	3	4.6408e+08	3.91684e+09	2.04265	45.1799	49.1795	53.5434	0.98359	1.01668	1.18512	FALSE	FALSE	4.92359e+09	4.31676e+09	3.47668e+09	39.7763	45.3679	56.3302	0.907357	1.1021	1.41617	FALSE	FALSE	7.65724e+09	4.09467e+09	1.16582e+09	25.5761	47.8286	167.986	0.956571	1.0454	6.5681	FALSE	FALSE	9.87482	9.39856	8.91926	26.1266	78.2252	235.854	1.5645	1.5645	9.02734	FALSE	FALSE
Solvent	M8PFOA	422	100	0.236967	1	8.22332e+08	3.47025e+09	2.04265	81.7278	86.2246	90.9788	0.862246	1.15976	1.11319	FALSE	TRUE	4.92359e+09	4.31676e+09	3.47668e+09	70.4821	80.3901	99.8149	0.803901	1.24393	1.41617	FALSE	TRUE	7.65724e+09	4.09467e+09	1.16582e+09	45.3198	84.7503	297.665	0.847503	1.17994	6.5681	FALSE	FALSE	9.87482	9.39856	8.91926	46.2953	138.612	417.924	1.38612	1.38612	9.02734	FALSE	FALSE
Solvent	M8PFOA	422	100	0.236967	2	9.24937e+08	3.90324e+09	2.04265	89.9475	97.9927	106.789	0.979927	1.02048	1.18724	FALSE	FALSE	4.92359e+09	4.31676e+09	3.47668e+09	79.2764	90.4206	112.269	0.904206	1.10594	1.41617	FALSE	FALSE	7.65724e+09	4.09467e+09	1.16582e+09	50.9745	95.3249	334.806	0.953249	1.04904	6.5681	FALSE	FALSE	9.87482	9.39856	8.91926	52.0718	155.907	470.07	1.55907	1.55907	9.02734	FALSE	FALSE
Solvent	M8PFOA	422	100	0.236967	3	9.20629e+08	3.88506e+09	2.04265	89.5171	97.4949	106.215	0.974949	1.02569	1.18654	FALSE	FALSE	4.92359e+09	4.31676e+09	3.47668e+09	78.9071	89.9995	111.746	0.899995	1.11112	1.41617	FALSE	FALSE	7.65724e+09	4.09467e+09	1.16582e+09	50.737	94.8809	333.246	0.948809	1.05395	6.5681	FALSE	FALSE	9.87482	9.39856	8.91926	51.8292	155.181	467.88	1.55181	1.55181	9.02734	FALSE	FALSE
Solvent	M8PFOA	422	250	0.592416	1	2.49482e+09	4.21125e+09	2.04265	245.867	267.259	290.636	1.06904	1.06904	1.18209	FALSE	FALSE	4.92359e+09	4.31676e+09	3.47668e+09	213.831	243.89	302.821	0.975559	1.02505	1.41617	FALSE	FALSE	7.65724e+09	4.09467e+09	1.16582e+09	137.492	257.118	903.064	1.02847	1.02847	6.5681	FALSE	FALSE	9.87482	9.39856	8.91926	140.452	420.525	1267.91	1.6821	1.6821	9.02734	FALSE	FALSE
Solvent	M8PFOA	422	250	0.592416	2	2.41137e+09	4.0704e+09	2.04265	235.416	256.983	280.655	1.02793	1.02793	1.19217	FALSE	FALSE	4.92359e+09	4.31676e+09	3.47668e+09	206.679	235.733	292.693	0.94293	1.06052	1.41617	FALSE	FALSE	7.65724e+09	4.09467e+09	1.16582e+09	132.894	248.518	872.86	0.994073	1.00596	6.5681	FALSE	FALSE	9.87482	9.39856	8.91926	135.755	406.46	1225.5	1.62584	1.62584	9.02734	FALSE	FALSE
Solvent	M8PFOA	422	250	0.592416	3	2.41354e+09	4.07406e+09	2.04265	235.674	257.249	280.927	1.02899	1.02899	1.19202	FALSE	FALSE	4.92359e+09	4.31676e+09	3.47668e+09	206.864	235.944	292.956	0.943777	1.05957	1.41617	FALSE	FALSE	7.65724e+09	4.09467e+09	1.16582e+09	133.013	248.742	873.644	0.994966	1.00506	6.5681	FALSE	FALSE	9.87482	9.39856	8.91926	135.876	406.825	1226.6	1.6273	1.6273	9.02734	FALSE	FALSE
Solvent	M3PFHxS	402.954	0.474	0.00117631	1	9.05088e+06	7.69427e+09	2.39536	0.360378	0.426786	0.504479	0.900392	1.11063	1.39986	FALSE	FALSE	8.92687e+09	4.78495e+09	1.00735e+09	0.408552	0.7622	3.62047	1.60802	1.60802	8.86173	FALSE	FALSE	7.35523e+09	3.99568e+09	1.16422e+09	0.495849	0.912756	3.13264	1.92565	1.92565	6.31772	TRUE	FALSE	10.0264	9.55916	9.09405	0.34321	1.00643	2.93697	2.12327	2.12327	8.55735	FALSE	FALSE
Solvent	M3PFHxS	402.954	0.474	0.00117631	2	9.1861e+06	7.80923e+09	2.39536	0.366507	0.434918	0.515108	0.917549	1.08986	1.40545	FALSE	FALSE	8.92687e+09	4.78495e+09	1.00735e+09	0.414656	0.773587	3.67456	1.63204	1.63204	8.86173	FALSE	FALSE	7.35523e+09	3.99568e+09	1.16422e+09	0.503258	0.926393	3.17944	1.95442	1.95442	6.31772	TRUE	FALSE	10.0264	9.55916	9.09405	0.348337	1.02147	2.98084	2.155	2.155	8.55735	FALSE	FALSE
Solvent	M3PFHxS	402.954	0.474	0.00117631	3	9.2968e+06	7.90333e+09	2.39536	0.371654	0.441593	0.523674	0.93163	1.07339	1.40904	FALSE	FALSE	8.92687e+09	4.78495e+09	1.00735e+09	0.419652	0.782909	3.71885	1.65171	1.65171	8.86173	FALSE	FALSE	7.35523e+09	3.99568e+09	1.16422e+09	0.509322	0.937557	3.21776	1.97797	1.97797	6.31772	TRUE	FALSE	10.0264	9.55916	9.09405	0.352535	1.03378	3.01677	2.18096	2.18096	8.55735	FALSE	FALSE
Solvent	M3PFHxS	402.954	0.948	0.00235263	1	1.78165e+07	7.57304e+09	2.39536	0.755387	0.89434	1.05729	0.943397	1.06	1.39967	FALSE	FALSE	8.92687e+09	4.78495e+09	1.00735e+09	0.804228	1.50038	7.12685	1.58268	1.58268	8.86173	FALSE	FALSE	7.35523e+09	3.99568e+09	1.16422e+09	0.976073	1.79675	6.16656	1.8953	1.8953	6.31772	TRUE	FALSE	10.0264	9.55916	9.09405	0.675603	1.98115	5.78138	2.08982	2.08982	8.55735	FALSE	FALSE
Solvent	M3PFHxS	402.954	0.948	0.00235263	2	1.81359e+07	7.7088e+09	2.39536	0.770991	0.91379	1.08143	0.963913	1.03744	1.40265	FALSE	FALSE	8.92687e+09	4.78495e+09	1.00735e+09	0.818646	1.52728	7.25462	1.61105	1.61105	8.86173	FALSE	FALSE	7.35523e+09	3.99568e+09	1.16422e+09	0.993571	1.82896	6.27711	1.92928	1.92928	6.31772	TRUE	FALSE	10.0264	9.55916	9.09405	0.687715	2.01666	5.88502	2.12728	2.12728	8.55735	FALSE	FALSE
Solvent	M3PFHxS	402.954	0.948	0.00235263	3	1.79029e+07	7.60976e+09	2.39536	0.759562	0.899596	1.06387	0.948941	1.05381	1.40064	FALSE	FALSE	8.92687e+09	4.78495e+09	1.00735e+09	0.808128	1.50766	7.16141	1.59035	1.59035	8.86173	FALSE	FALSE	7.35523e+09	3.99568e+09	1.16422e+09	0.980806	1.80546	6.19646	1.9045	1.9045	6.31772	TRUE	FALSE	10.0264	9.55916	9.09405	0.67888	1.99075	5.80941	2.09995	2.09995	8.55735	FALSE	FALSE
Solvent	M3PFHxS	402.954	4.74	0.0117631	1	8.84392e+07	7.51834e+09	2.39536	4.3251	5.08308	5.97115	1.07238	1.07238	1.38058	FALSE	FALSE	8.92687e+09	4.78495e+09	1.00735e+09	3.9921	7.44771	35.3769	1.57125	1.57125	8.86173	FALSE	FALSE	7.35523e+09	3.99568e+09	1.16422e+09	4.84512	8.91885	30.6101	1.88161	1.88161	6.31772	TRUE	FALSE	10.0264	9.55916	9.09405	3.35362	9.83419	28.6981	2.07472	2.07472	8.55735	FALSE	FALSE
Solvent	M3PFHxS	402.954	4.74	0.0117631	2	8.98878e+07	7.64148e+09	2.39536	4.41408	5.17762	6.07056	1.09232	1.09232	1.37527	FALSE	FALSE	8.92687e+09	4.78495e+09	1.00735e+09	4.05749	7.5697	35.9563	1.59698	1.59698	8.86173	FALSE	FALSE	7.35523e+09	3.99568e+09	1.16422e+09	4.92447	9.06494	31.1115	1.91243	1.91243	6.31772	TRUE	FALSE	10.0264	9.55916	9.09405	3.40855	9.99526	29.1682	2.10871	2.10871	8.55735	FALSE	FALSE
Solvent	M3PFHxS	402.954	4.74	0.0117631	3	9.11525e+07	7.749e+09	2.39536	4.49371	5.2603	6.15506	1.10977	1.10977	1.3697	FALSE	FALSE	8.92687e+09	4.78495e+09	1.00735e+09	4.11458	7.67621	36.4623	1.61945	1.61945	8.86173	FALSE	FALSE	7.35523e+09	3.99568e+09	1.16422e+09	4.99376	9.19248	31.5492	1.93934	1.93934	6.31772	TRUE	FALSE	10.0264	9.55916	9.09405	3.45651	10.1359	29.5786	2.13838	2.13838	8.55735	FALSE	FALSE
Solvent	M3PFHxS	402.954	9.48	0.0235263	1	1.62868e+08	6.92282e+09	2.39536	8.32388	9.79921	11.5347	1.03367	1.03367	1.38573	FALSE	FALSE	8.92687e+09	4.78495e+09	1.00735e+09	7.35178	13.7156	65.1495	1.44679	1.44679	8.86173	FALSE	FALSE	7.35523e+09	3.99568e+09	1.16422e+09	8.92268	16.4248	56.371	1.73258	1.73258	6.31772	FALSE	FALSE	10.0264	9.55916	9.09405	6.17597	18.1105	52.8499	1.91039	1.91039	8.55735	FALSE	FALSE
Solvent	M3PFHxS	402.954	9.48	0.0235263	2	1.70964e+08	7.26693e+09	2.39536	8.82876	10.3492	12.1304	1.09169	1.09169	1.37397	FALSE	FALSE	8.92687e+09	4.78495e+09	1.00735e+09	7.71721	14.3973	68.3878	1.51871	1.51871	8.86173	FALSE	FALSE	7.35523e+09	3.99568e+09	1.16422e+09	9.3662	17.2412	59.173	1.8187	1.8187	6.31772	FALSE	FALSE	10.0264	9.55916	9.09405	6.48295	19.0107	55.4769	2.00535	2.00535	8.55735	FALSE	FALSE
Solvent	M3PFHxS	402.954	9.48	0.0235263	3	1.71747e+08	7.30024e+09	2.39536	8.87972	10.4026	12.1856	1.09732	1.09732	1.3723	FALSE	FALSE	8.92687e+09	4.78495e+09	1.00735e+09	7.75258	14.4633	68.7013	1.52567	1.52567	8.86173	FALSE	FALSE	7.35523e+09	3.99568e+09	1.16422e+09	9.40912	17.3202	59.4442	1.82703	1.82703	6.31772	FALSE	FALSE	10.0264	9.55916	9.09405	6.51266	19.0978	55.7312	2.01454	2.01454	8.55735	FALSE	FALSE
Solvent	M3PFHxS	402.954	23.7	0.0588157	1	4.07997e+08	6.93687e+09	2.39536	22.6481	26.4796	30.971	1.11728	1.11728	1.36749	FALSE	FALSE	8.92687e+09	4.78495e+09	1.00735e+09	18.4168	34.3585	163.204	1.44973	1.44973	8.86173	FALSE	FALSE	7.35523e+09	3.99568e+09	1.16422e+09	22.352	41.1454	141.214	1.73609	1.73609	6.31772	FALSE	FALSE	10.0264	9.55916	9.09405	15.4712	45.3681	132.393	1.91426	1.91426	8.55735	FALSE	FALSE
Solvent	M3PFHxS	402.954	23.7	0.0588157	2	3.9929e+08	6.78884e+09	2.39536	22.0337	25.841	30.3176	1.09034	1.09034	1.37597	FALSE	FALSE	8.92687e+09	4.78495e+09	1.00735e+09	18.0237	33.6253	159.721	1.41879	1.41879	8.86173	FALSE	FALSE	7.35523e+09	3.99568e+09	1.16422e+09	21.875	40.2673	138.2	1.69904	1.69904	6.31772	FALSE	FALSE	10.0264	9.55916	9.09405	15.1411	44.3999	129.568	1.87341	1.87341	8.55735	FALSE	FALSE
Solvent	M3PFHxS	402.954	23.7	0.0588157	3	3.99583e+08	6.79383e+09	2.39536	22.054	25.8624	30.34	1.09124	1.09124	1.37571	FALSE	FALSE	8.92687e+09	4.78495e+09	1.00735e+09	18.037	33.65	159.839	1.41983	1.41983	8.86173	FALSE	FALSE	7.35523e+09	3.99568e+09	1.16422e+09	21.8911	40.2969	138.302	1.70029	1.70029	6.31772	FALSE	FALSE	10.0264	9.55916	9.09405	15.1522	44.4325	129.663	1.87479	1.87479	8.55735	FALSE	FALSE
Solvent	M3PFHxS	402.954	47.4	0.117631	1	7.17071e+08	6.09592e+09	2.39536	41.0935	48.455	57.178	1.02226	1.02226	1.39141	FALSE	FALSE	8.92687e+09	4.78495e+09	1.00735e+09	32.3682	60.3866	286.838	1.27398	1.27398	8.86173	FALSE	FALSE	7.35523e+09	3.99568e+09	1.16422e+09	39.2845	72.3146	248.189	1.52563	1.52563	6.31772	FALSE	FALSE	10.0264	9.55916	9.09405	27.1914	79.7362	232.686	1.6822	1.6822	8.55735	FALSE	FALSE
Solvent	M3PFHxS	402.954	47.4	0.117631	2	7.14752e+08	6.0762e+09	2.39536	40.9378	48.2751	56.9701	1.01846	1.01846	1.39163	FALSE	FALSE	8.92687e+09	4.78495e+09	1.00735e+09	32.2635	60.1912	285.91	1.26986	1.26986	8.86173	FALSE	FALSE	7.35523e+09	3.99568e+09	1.16422e+09	39.1574	72.0807	247.386	1.52069	1.52069	6.31772	FALSE	FALSE	10.0264	9.55916	9.09405	27.1034	79.4783	231.933	1.67676	1.67676	8.55735	FALSE	FALSE
Solvent	M3PFHxS	402.954	47.4	0.117631	3	7.10903e+08	6.04348e+09	2.39536	40.6812	47.9769	56.6232	1.01217	1.01217	1.39187	FALSE	FALSE	8.92687e+09	4.78495e+09	1.00735e+09	32.0898	59.8671	284.371	1.26302	1.26302	8.86173	FALSE	FALSE	7.35523e+09	3.99568e+09	1.16422e+09	38.9466	71.6926	246.054	1.5125	1.5125	6.31772	FALSE	FALSE	10.0264	9.55916	9.09405	26.9575	79.0503	230.684	1.66773	1.66773	8.55735	FALSE	FALSE
Solvent	M3PFHxS	402.954	94.8	0.235263	1	1.15638e+09	4.91525e+09	2.39536	68.9958	79.9109	92.6289	0.842942	1.18632	1.34253	FALSE	TRUE	8.92687e+09	4.78495e+09	1.00735e+09	52.1982	97.3816	462.566	1.02723	1.02723	8.86173	FALSE	FALSE	7.35523e+09	3.99568e+09	1.16422e+09	63.3517	116.617	400.238	1.23014	1.23014	6.31772	FALSE	FALSE	10.0264	9.55916	9.09405	43.8498	128.586	375.238	1.35639	1.35639	8.55735	FALSE	FALSE
Solvent	M3PFHxS	402.954	94.8	0.235263	2	1.2832e+09	5.45432e+09	2.39536	76.5312	90.2704	106.593	0.952219	1.05018	1.39281	FALSE	FALSE	8.92687e+09	4.78495e+09	1.00735e+09	57.9228	108.062	513.296	1.13989	1.13989	8.86173	FALSE	FALSE	7.35523e+09	3.99568e+09	1.16422e+09	70.2995	129.407	444.133	1.36505	1.36505	6.31772	FALSE	FALSE	10.0264	9.55916	9.09405	48.6589	142.688	416.391	1.50515	1.50515	8.55735	FALSE	FALSE
Solvent	M3PFHxS	402.954	94.8	0.235263	3	1.27902e+09	5.43657e+09	2.39536	76.2592	89.9257	106.158	0.948583	1.0542	1.39206	FALSE	FALSE	8.92687e+09	4.78495e+09	1.00735e+09	57.7344	107.71	511.627	1.13618	1.13618	8.86173	FALSE	FALSE	7.35523e+09	3.99568e+09	1.16422e+09	70.0709	128.986	442.688	1.36061	1.36061	6.31772	FALSE	FALSE	10.0264	9.55916	9.09405	48.5006	142.224	415.037	1.50025	1.50025	8.55735	FALSE	FALSE
Solvent	M3PFHxS	402.954	237	0.588157	1	3.00098e+09	5.10235e+09	2.39536	190.099	225.07	266.923	0.949662	1.05301	1.40412	FALSE	FALSE	8.92687e+09	4.78495e+09	1.00735e+09	135.463	252.721	1200.43	1.06633	1.06633	8.86173	FALSE	FALSE	7.35523e+09	3.99568e+09	1.16422e+09	164.408	302.641	1038.68	1.27697	1.27697	6.31772	FALSE	FALSE	10.0264	9.55916	9.09405	113.797	333.701	973.804	1.40802	1.40802	8.55735	FALSE	FALSE
Solvent	M3PFHxS	402.954	237	0.588157	2	2.94765e+09	5.01168e+09	2.39536	186.29	220.144	260.576	0.928879	1.07657	1.39876	FALSE	FALSE	8.92687e+09	4.78495e+09	1.00735e+09	133.055	248.23	1179.1	1.04738	1.04738	8.86173	FALSE	FALSE	7.35523e+09	3.99568e+09	1.16422e+09	161.486	297.263	1020.23	1.25427	1.25427	6.31772	FALSE	FALSE	10.0264	9.55916	9.09405	111.775	327.771	956.499	1.383	1.383	8.55735	FALSE	FALSE
Solvent	M3PFHxS	402.954	237	0.588157	3	2.95749e+09	5.02841e+09	2.39536	186.983	221.051	261.756	0.932704	1.07215	1.39989	FALSE	FALSE	8.92687e+09	4.78495e+09	1.00735e+09	133.5	249.059	1183.04	1.05088	1.05088	8.86173	FALSE	FALSE	7.35523e+09	3.99568e+09	1.16422e+09	162.025	298.255	1023.63	1.25846	1.25846	6.31772	FALSE	FALSE	10.0264	9.55916	9.09405	112.148	328.865	959.692	1.38761	1.38761	8.55735	FALSE	FALSE
Solvent	M9PFNA	473.001	0.5	0.00105708	1	5.09007e+06	4.81521e+09	2.04878	0.431333	0.473607	0.519726	0.947214	1.05573	1.20493	FALSE	FALSE	4.72462e+09	4.21125e+09	3.8341e+09	0.509587	0.571708	0.627945	1.14342	1.14342	1.23226	TRUE	FALSE	7.66776e+09	4.01998e+09	1.16187e+09	0.313991	0.59891	2.07218	1.19782	1.19782	6.59949	FALSE	FALSE	9.8648	9.39383	8.92007	0.328691	0.972197	2.89412	1.94439	1.94439	8.80498	FALSE	FALSE
Solvent	M9PFNA	473.001	0.5	0.00105708	2	5.27186e+06	4.98718e+09	2.04878	0.448681	0.494037	0.54365	0.988074	1.01207	1.21166	FALSE	FALSE	4.72462e+09	4.21125e+09	3.8341e+09	0.527787	0.592126	0.650371	1.18425	1.18425	1.23226	TRUE	FALSE	7.66776e+09	4.01998e+09	1.16187e+09	0.325205	0.620299	2.14619	1.2406	1.2406	6.59949	FALSE	FALSE	9.8648	9.39383	8.92007	0.34043	1.00692	2.99748	2.01384	2.01384	8.80498	FALSE	FALSE
Solvent	M9PFNA	473.001	0.5	0.00105708	3	5.26308e+06	4.97888e+09	2.04878	0.447803	0.493049	0.54254	0.986098	1.0141	1.21156	FALSE	FALSE	4.72462e+09	4.21125e+09	3.8341e+09	0.526908	0.59114	0.649289	1.18228	1.18228	1.23226	TRUE	FALSE	7.66776e+09	4.01998e+09	1.16187e+09	0.324664	0.619267	2.14262	1.23853	1.23853	6.59949	FALSE	FALSE	9.8648	9.39383	8.92007	0.339863	1.00524	2.99249	2.01048	2.01048	8.80498	FALSE	FALSE
Solvent	M9PFNA	473.001	1	0.00211416	1	1.01687e+07	4.80979e+09	2.04878	0.880297	0.966048	1.05968	0.966048	1.03515	1.20377	FALSE	FALSE	4.72462e+09	4.21125e+09	3.8341e+09	1.01803	1.14213	1.25448	1.14213	1.14213	1.23226	TRUE	FALSE	7.66776e+09	4.01998e+09	1.16187e+09	0.627274	1.19647	4.13969	1.19647	1.19647	6.59949	FALSE	FALSE	9.8648	9.39383	8.92007	0.656641	1.9422	5.78171	1.9422	1.9422	8.80498	FALSE	FALSE
Solvent	M9PFNA	473.001	1	0.00211416	2	1.03845e+07	4.91189e+09	2.04878	0.900805	0.989627	1.08672	0.989627	1.01048	1.20638	FALSE	FALSE	4.72462e+09	4.21125e+09	3.8341e+09	1.03964	1.16637	1.2811	1.16637	1.16637	1.23226	TRUE	FALSE	7.66776e+09	4.01998e+09	1.16187e+09	0.64059	1.22187	4.22757	1.22187	1.22187	6.59949	FALSE	FALSE	9.8648	9.39383	8.92007	0.67058	1.98343	5.90444	1.98343	1.98343	8.80498	FALSE	FALSE
Solvent	M9PFNA	473.001	1	0.00211416	3	1.04019e+07	4.92013e+09	2.04878	0.902512	0.991532	1.08884	0.991532	1.00854	1.20646	FALSE	FALSE	4.72462e+09	4.21125e+09	3.8341e+09	1.04138	1.16833	1.28325	1.16833	1.16833	1.23226	TRUE	FALSE	7.66776e+09	4.01998e+09	1.16187e+09	0.641665	1.22392	4.23466	1.22392	1.22392	6.59949	FALSE	FALSE	9.8648	9.39383	8.92007	0.671705	1.98676	5.91435	1.98676	1.98676	8.80498	FALSE	FALSE
Solvent	M9PFNA	473.001	5	0.0105708	1	5.18844e+07	4.90827e+09	2.04878	4.70727	5.15089	5.63549	1.03018	1.03018	1.19719	FALSE	FALSE	4.72462e+09	4.21125e+09	3.8341e+09	5.19436	5.82757	6.40081	1.16551	1.16551	1.23226	TRUE	FALSE	7.66776e+09	4.01998e+09	1.16187e+09	3.20059	6.10485	21.1223	1.22097	1.22097	6.59949	FALSE	FALSE	9.8648	9.39383	8.92007	3.35043	9.90986	29.5005	1.98197	1.98197	8.80498	FALSE	FALSE
Solvent	M9PFNA	473.001	5	0.0105708	2	5.20762e+07	4.92642e+09	2.04878	4.72743	5.17142	5.65628	1.03428	1.03428	1.19648	FALSE	FALSE	4.72462e+09	4.21125e+09	3.8341e+09	5.21356	5.84911	6.42447	1.16982	1.16982	1.23226	TRUE	FALSE	7.66776e+09	4.01998e+09	1.16187e+09	3.21242	6.12741	21.2004	1.22548	1.22548	6.59949	FALSE	FALSE	9.8648	9.39383	8.92007	3.36282	9.94649	29.6095	1.9893	1.9893	8.80498	FALSE	FALSE
Solvent	M9PFNA	473.001	5	0.0105708	3	5.33615e+07	5.048e+09	2.04878	4.86746	5.30908	5.78998	1.06182	1.06182	1.18953	FALSE	FALSE	4.72462e+09	4.21125e+09	3.8341e+09	5.34223	5.99347	6.58303	1.19869	1.19869	1.23226	TRUE	FALSE	7.66776e+09	4.01998e+09	1.16187e+09	3.29171	6.27864	21.7236	1.25573	1.25573	6.59949	FALSE	FALSE	9.8648	9.39383	8.92007	3.44582	10.192	30.3403	2.0384	2.0384	8.80498	FALSE	FALSE
Solvent	M9PFNA	473.001	10	0.0211416	1	9.89065e+07	4.67828e+09	2.04878	9.09148	9.95408	10.8981	0.995408	1.00461	1.19871	FALSE	FALSE	4.72462e+09	4.21125e+09	3.8341e+09	9.90193	11.109	12.2018	1.1109	1.1109	1.23226	FALSE	FALSE	7.66776e+09	4.01998e+09	1.16187e+09	6.10124	11.6376	40.2651	1.16376	1.16376	6.59949	FALSE	FALSE	9.8648	9.39383	8.92007	6.38688	18.891	56.2364	1.8891	1.8891	8.80498	FALSE	FALSE
Solvent	M9PFNA	473.001	10	0.0211416	2	1.01811e+08	4.81566e+09	2.04878	9.3845	10.2669	11.2318	1.02669	1.02669	1.19684	FALSE	FALSE	4.72462e+09	4.21125e+09	3.8341e+09	10.1927	11.4352	12.5601	1.14352	1.14352	1.23226	TRUE	FALSE	7.66776e+09	4.01998e+09	1.16187e+09	6.2804	11.9793	41.4475	1.19793	1.19793	6.59949	FALSE	FALSE	9.8648	9.39383	8.92007	6.57443	19.4457	57.8877	1.94457	1.94457	8.80498	FALSE	FALSE
Solvent	M9PFNA	473.001	10	0.0211416	3	1.01624e+08	4.80682e+09	2.04878	9.36502	10.2467	11.211	1.02467	1.02467	1.19712	FALSE	FALSE	4.72462e+09	4.21125e+09	3.8341e+09	10.174	11.4142	12.537	1.14142	1.14142	1.23226	TRUE	FALSE	7.66776e+09	4.01998e+09	1.16187e+09	6.26888	11.9573	41.3714	1.19573	1.19573	6.59949	FALSE	FALSE	9.8648	9.39383	8.92007	6.56237	19.4101	57.7815	1.94101	1.94101	8.80498	FALSE	FALSE
Solvent	M9PFNA	473.001	25	0.052854	1	2.53908e+08	4.80396e+09	2.04878	23.9808	26.1951	28.6169	1.0478	1.0478	1.19332	FALSE	FALSE	4.72462e+09	4.21125e+09	3.8341e+09	25.4198	28.5186	31.3239	1.14074	1.14074	1.23226	TRUE	FALSE	7.66776e+09	4.01998e+09	1.16187e+09	15.6628	29.8755	103.367	1.19502	1.19502	6.59949	FALSE	FALSE	9.8648	9.39383	8.92007	16.3961	48.4962	144.368	1.93985	1.93985	8.80498	FALSE	FALSE
Solvent	M9PFNA	473.001	25	0.052854	2	2.51347e+08	4.75549e+09	2.04878	23.6968	25.9114	28.3361	1.03646	1.03646	1.19578	FALSE	FALSE	4.72462e+09	4.21125e+09	3.8341e+09	25.1633	28.2308	31.0078	1.12923	1.12923	1.23226	TRUE	FALSE	7.66776e+09	4.01998e+09	1.16187e+09	15.5048	29.5741	102.324	1.18296	1.18296	6.59949	FALSE	FALSE	9.8648	9.39383	8.92007	16.2307	48.0069	142.911	1.92028	1.92028	8.80498	FALSE	FALSE
Solvent	M9PFNA	473.001	25	0.052854	3	2.54961e+08	4.82386e+09	2.04878	24.0997	26.3117	28.7298	1.05247	1.05247	1.19212	FALSE	FALSE	4.72462e+09	4.21125e+09	3.8341e+09	25.5251	28.6367	31.4537	1.14547	1.14547	1.23226	TRUE	FALSE	7.66776e+09	4.01998e+09	1.16187e+09	15.7278	29.9993	103.795	1.19997	1.19997	6.59949	FALSE	FALSE	9.8648	9.39383	8.92007	16.4641	48.6972	144.966	1.94789	1.94789	8.80498	FALSE	FALSE
Solvent	M9PFNA	473.001	50	0.105708	1	4.83745e+08	4.57623e+09	2.04878	46.192	50.6051	55.4524	1.0121	1.0121	1.20048	FALSE	FALSE	4.72462e+09	4.21125e+09	3.8341e+09	48.4296	54.3334	59.678	1.08667	1.08667	1.23226	FALSE	FALSE	7.66776e+09	4.01998e+09	1.16187e+09	29.8407	56.9186	196.934	1.13837	1.13837	6.59949	FALSE	FALSE	9.8648	9.39383	8.92007	31.2378	92.3946	275.048	1.84789	1.84789	8.80498	FALSE	FALSE
Solvent	M9PFNA	473.001	50	0.105708	2	4.72912e+08	4.47375e+09	2.04878	45.07	49.3721	54.097	0.987442	1.01272	1.20029	FALSE	FALSE	4.72462e+09	4.21125e+09	3.8341e+09	47.3451	53.1166	58.3416	1.06233	1.06233	1.23226	FALSE	FALSE	7.66776e+09	4.01998e+09	1.16187e+09	29.1725	55.644	192.524	1.11288	1.11288	6.59949	FALSE	FALSE	9.8648	9.39383	8.92007	30.5383	90.3256	268.889	1.80651	1.80651	8.80498	FALSE	FALSE
Solvent	M9PFNA	473.001	50	0.105708	3	4.70658e+08	4.45243e+09	2.04878	44.8447	49.116	53.806	0.982319	1.018	1.19983	FALSE	FALSE	4.72462e+09	4.21125e+09	3.8341e+09	47.1194	52.8634	58.0635	1.05727	1.05727	1.23226	FALSE	FALSE	7.66776e+09	4.01998e+09	1.16187e+09	29.0334	55.3787	191.606	1.10757	1.10757	6.59949	FALSE	FALSE	9.8648	9.39383	8.92007	30.3927	89.895	267.607	1.7979	1.7979	8.80498	FALSE	FALSE
Solvent	M9PFNA	473.001	100	0.211416	1	8.19288e+08	3.87524e+09	2.04878	80.6888	85.6488	90.9261	0.856488	1.16756	1.12687	FALSE	TRUE	4.72462e+09	4.21125e+09	3.8341e+09	82.0222	92.0211	101.073	0.920211	1.08671	1.23226	FALSE	FALSE	7.66776e+09	4.01998e+09	1.16187e+09	50.5394	96.3995	333.535	0.963995	1.03735	6.59949	FALSE	FALSE	9.8648	9.39383	8.92007	52.9055	156.483	465.832	1.56483	1.56483	8.80498	FALSE	FALSE
Solvent	M9PFNA	473.001	100	0.211416	2	9.16417e+08	4.33466e+09	2.04878	88.5511	97.0218	106.339	0.970218	1.0307	1.20088	FALSE	FALSE	4.72462e+09	4.21125e+09	3.8341e+09	91.7461	102.93	113.055	1.0293	1.0293	1.23226	FALSE	FALSE	7.66776e+09	4.01998e+09	1.16187e+09	56.531	107.828	373.076	1.07828	1.07828	6.59949	FALSE	FALSE	9.8648	9.39383	8.92007	59.1776	175.034	521.057	1.75034	1.75034	8.80498	FALSE	FALSE
Solvent	M9PFNA	473.001	100	0.211416	3	9.19342e+08	4.34849e+09	2.04878	88.8453	97.3674	106.743	0.973674	1.02704	1.20145	FALSE	FALSE	4.72462e+09	4.21125e+09	3.8341e+09	92.039	103.259	113.416	1.03259	1.03259	1.23226	FALSE	FALSE	7.66776e+09	4.01998e+09	1.16187e+09	56.7114	108.172	374.267	1.08172	1.08172	6.59949	FALSE	FALSE	9.8648	9.39383	8.92007	59.3665	175.593	522.72	1.75593	1.75593	8.80498	FALSE	FALSE
Solvent	M9PFNA	473.001	250	0.52854	1	2.36207e+09	4.46904e+09	2.04878	234.285	257.388	282.92	1.02955	1.02955	1.20759	FALSE	FALSE	4.72462e+09	4.21125e+09	3.8341e+09	236.476	265.304	291.401	1.06121	1.06121	1.23226	FALSE	FALSE	7.66776e+09	4.01998e+09	1.16187e+09	145.709	277.927	961.605	1.11171	1.11171	6.59949	FALSE	FALSE	9.8648	9.39383	8.92007	152.53	451.152	1343.03	1.80461	1.80461	8.80498	FALSE	FALSE
Solvent	M9PFNA	473.001	250	0.52854	2	2.32054e+09	4.39046e+09	2.04878	229.275	252.069	277.277	1.00827	1.00827	1.20936	FALSE	FALSE	4.72462e+09	4.21125e+09	3.8341e+09	232.318	260.639	286.277	1.04256	1.04256	1.23226	FALSE	FALSE	7.66776e+09	4.01998e+09	1.16187e+09	143.147	273.04	944.697	1.09216	1.09216	6.59949	FALSE	FALSE	9.8648	9.39383	8.92007	149.849	443.22	1319.41	1.77288	1.77288	8.80498	FALSE	FALSE
Solvent	M9PFNA	473.001	250	0.52854	3	2.31936e+09	4.38823e+09	2.04878	229.136	251.917	277.112	1.00767	1.00767	1.20938	FALSE	FALSE	4.72462e+09	4.21125e+09	3.8341e+09	232.2	260.506	286.131	1.04202	1.04202	1.23226	FALSE	FALSE	7.66776e+09	4.01998e+09	1.16187e+09	143.074	272.901	944.216	1.0916	1.0916	6.59949	FALSE	FALSE	9.8648	9.39383	8.92007	149.772	442.994	1318.74	1.77198	1.77198	8.80498	FALSE	FALSE
Solvent	M6PFDA	519.987	0.5	0.000961562	1	4.44553e+06	4.62324e+09	2.29362	0.436256	0.477795	0.523006	0.955589	1.04647	1.19885	FALSE	FALSE	4.92642e+09	4.44906e+09	3.8788e+09	0.46923	0.519575	0.595963	1.03915	1.03915	1.27009	FALSE	FALSE	7.66311e+09	3.99841e+09	1.16215e+09	0.301656	0.578135	1.98908	1.15627	1.15627	6.59389	FALSE	FALSE	9.99189	9.51767	9.04359	0.235522	0.701846	2.09084	1.40369	1.40369	8.8775	FALSE	FALSE
Solvent	M6PFDA	519.987	0.5	0.000961562	2	4.61805e+06	4.80266e+09	2.29362	0.455686	0.5001	0.548537	1.0002	1.0002	1.20376	FALSE	FALSE	4.92642e+09	4.44906e+09	3.8788e+09	0.48744	0.539739	0.619092	1.07948	1.07948	1.27009	FALSE	FALSE	7.66311e+09	3.99841e+09	1.16215e+09	0.313362	0.600571	2.06628	1.20114	1.20114	6.59389	FALSE	FALSE	9.99189	9.51767	9.04359	0.244662	0.729084	2.17199	1.45817	1.45817	8.8775	FALSE	FALSE
Solvent	M6PFDA	519.987	0.5	0.000961562	3	4.57708e+06	4.76004e+09	2.29362	0.450875	0.494793	0.542685	0.989586	1.01052	1.20362	FALSE	FALSE	4.92642e+09	4.44906e+09	3.8788e+09	0.483114	0.534949	0.613598	1.0699	1.0699	1.27009	FALSE	FALSE	7.66311e+09	3.99841e+09	1.16215e+09	0.310582	0.595242	2.04794	1.19048	1.19048	6.59389	FALSE	FALSE	9.99189	9.51767	9.04359	0.242491	0.722614	2.15271	1.44523	1.44523	8.8775	FALSE	FALSE
Solvent	M6PFDA	519.987	1	0.00192312	1	8.95816e+06	4.65813e+09	2.29362	0.896198	0.98108	1.07355	0.98108	1.01928	1.1979	FALSE	FALSE	4.92642e+09	4.44906e+09	3.8788e+09	0.945542	1.04699	1.20092	1.04699	1.04699	1.27009	FALSE	FALSE	7.66311e+09	3.99841e+09	1.16215e+09	0.607864	1.165	4.00819	1.165	1.165	6.59389	FALSE	FALSE	9.99189	9.51767	9.04359	0.474598	1.41429	4.21325	1.41429	1.41429	8.8775	FALSE	FALSE
Solvent	M6PFDA	519.987	1	0.00192312	2	8.88545e+06	4.62032e+09	2.29362	0.888294	0.971975	1.0631	0.971975	1.02883	1.19678	FALSE	FALSE	4.92642e+09	4.44906e+09	3.8788e+09	0.937867	1.03849	1.19117	1.03849	1.03849	1.27009	FALSE	FALSE	7.66311e+09	3.99841e+09	1.16215e+09	0.60293	1.15554	3.97565	1.15554	1.15554	6.59389	FALSE	FALSE	9.99189	9.51767	9.04359	0.470746	1.40281	4.17905	1.40281	1.40281	8.8775	FALSE	FALSE
Solvent	M6PFDA	519.987	1	0.00192312	3	8.93128e+06	4.64415e+09	2.29362	0.893254	0.977713	1.06971	0.977713	1.0228	1.19754	FALSE	FALSE	4.92642e+09	4.44906e+09	3.8788e+09	0.942704	1.04385	1.19732	1.04385	1.04385	1.27009	FALSE	FALSE	7.66311e+09	3.99841e+09	1.16215e+09	0.60604	1.1615	3.99616	1.1615	1.1615	6.59389	FALSE	FALSE	9.99189	9.51767	9.04359	0.473174	1.41004	4.2006	1.41004	1.41004	8.8775	FALSE	FALSE
Solvent	M6PFDA	519.987	5	0.00961562	1	4.49732e+07	4.6771e+09	2.29362	4.67656	5.10375	5.56917	1.02075	1.02075	1.19087	FALSE	FALSE	4.92642e+09	4.44906e+09	3.8788e+09	4.74696	5.25627	6.02906	1.05125	1.05125	1.27009	FALSE	FALSE	7.66311e+09	3.99841e+09	1.16215e+09	3.0517	5.84869	20.1225	1.16974	1.16974	6.59389	FALSE	FALSE	9.99189	9.51767	9.04359	2.38265	7.10022	21.152	1.42004	1.42004	8.8775	FALSE	FALSE
Solvent	M6PFDA	519.987	5	0.00961562	2	4.57853e+07	4.76156e+09	2.29362	4.77406	5.20281	5.66929	1.04056	1.04056	1.18752	FALSE	FALSE	4.92642e+09	4.44906e+09	3.8788e+09	4.83268	5.3512	6.13793	1.07024	1.07024	1.27009	FALSE	FALSE	7.66311e+09	3.99841e+09	1.16215e+09	3.10681	5.95431	20.4859	1.19086	1.19086	6.59389	FALSE	FALSE	9.99189	9.51767	9.04359	2.42568	7.22844	21.534	1.44569	1.44569	8.8775	FALSE	FALSE
Solvent	M6PFDA	519.987	5	0.00961562	3	4.65295e+07	4.83895e+09	2.29362	4.86746	5.29365	5.75644	1.05873	1.05873	1.18264	FALSE	FALSE	4.92642e+09	4.44906e+09	3.8788e+09	4.91123	5.43818	6.2377	1.08764	1.08764	1.27009	FALSE	FALSE	7.66311e+09	3.99841e+09	1.16215e+09	3.1573	6.0511	20.8189	1.21022	1.21022	6.59389	FALSE	FALSE	9.99189	9.51767	9.04359	2.46511	7.34593	21.884	1.46919	1.46919	8.8775	FALSE	FALSE
Solvent	M6PFDA	519.987	10	0.0192312	1	8.59942e+07	4.47159e+09	2.29362	9.04615	9.87153	10.7718	0.987153	1.01301	1.19076	FALSE	FALSE	4.92642e+09	4.44906e+09	3.8788e+09	9.07676	10.0506	11.5283	1.00506	1.00506	1.27009	FALSE	FALSE	7.66311e+09	3.99841e+09	1.16215e+09	5.83522	11.1834	38.4768	1.11834	1.11834	6.59389	FALSE	FALSE	9.99189	9.51767	9.04359	4.55593	13.5765	40.4452	1.35765	1.35765	8.8775	FALSE	FALSE
Solvent	M6PFDA	519.987	10	0.0192312	2	9.00277e+07	4.68133e+09	2.29362	9.51169	10.3655	11.2955	1.03655	1.03655	1.18754	FALSE	FALSE	4.92642e+09	4.44906e+09	3.8788e+09	9.5025	10.5221	12.069	1.05221	1.05221	1.27009	FALSE	FALSE	7.66311e+09	3.99841e+09	1.16215e+09	6.10891	11.708	40.2815	1.1708	1.1708	6.59389	FALSE	FALSE	9.99189	9.51767	9.04359	4.76962	14.2133	42.3423	1.42133	1.42133	8.8775	FALSE	FALSE
Solvent	M6PFDA	519.987	10	0.0192312	3	8.91731e+07	4.63689e+09	2.29362	9.40847	10.2607	11.1897	1.02607	1.02607	1.18932	FALSE	FALSE	4.92642e+09	4.44906e+09	3.8788e+09	9.41229	10.4222	11.9544	1.04222	1.04222	1.27009	FALSE	FALSE	7.66311e+09	3.99841e+09	1.16215e+09	6.05092	11.5968	39.8991	1.15968	1.15968	6.59389	FALSE	FALSE	9.99189	9.51767	9.04359	4.72434	14.0784	41.9403	1.40784	1.40784	8.8775	FALSE	FALSE
Solvent	M6PFDA	519.987	25	0.0480781	1	2.2191e+08	4.61562e+09	2.29362	23.889	26.0273	28.3598	1.04109	1.04109	1.18715	FALSE	FALSE	4.92642e+09	4.44906e+09	3.8788e+09	23.4228	25.9359	29.7491	1.03744	1.03744	1.27009	FALSE	FALSE	7.66311e+09	3.99841e+09	1.16215e+09	15.0579	28.8591	99.2903	1.15436	1.15436	6.59389	FALSE	FALSE	9.99189	9.51767	9.04359	11.7567	35.0345	104.37	1.40138	1.40138	8.8775	FALSE	FALSE
Solvent	M6PFDA	519.987	25	0.0480781	2	2.23625e+08	4.65129e+09	2.29362	24.1076	26.2425	28.5693	1.0497	1.0497	1.18508	FALSE	FALSE	4.92642e+09	4.44906e+09	3.8788e+09	23.6038	26.1363	29.9789	1.04545	1.04545	1.27009	FALSE	FALSE	7.66311e+09	3.99841e+09	1.16215e+09	15.1743	29.0821	100.057	1.16328	1.16328	6.59389	FALSE	FALSE	9.99189	9.51767	9.04359	11.8475	35.3052	105.176	1.41221	1.41221	8.8775	FALSE	FALSE
Solvent	M6PFDA	519.987	25	0.0480781	3	2.19593e+08	4.56741e+09	2.29362	23.6005	25.7365	28.0687	1.02946	1.02946	1.18933	FALSE	FALSE	4.92642e+09	4.44906e+09	3.8788e+09	23.1782	25.665	29.4383	1.0266	1.0266	1.27009	FALSE	FALSE	7.66311e+09	3.99841e+09	1.16215e+09	14.9007	28.5577	98.2532	1.14231	1.14231	6.59389	FALSE	FALSE	9.99189	9.51767	9.04359	11.6339	34.6686	103.28	1.38674	1.38674	8.8775	FALSE	FALSE
Solvent	M6PFDA	519.987	50	0.0961562	1	4.23336e+08	4.40258e+09	2.29362	45.9822	50.2214	54.8629	1.00443	1.00443	1.19313	FALSE	FALSE	4.92642e+09	4.44906e+09	3.8788e+09	44.6834	49.4777	56.7519	0.989553	1.01056	1.27009	FALSE	FALSE	7.66311e+09	3.99841e+09	1.16215e+09	28.7258	55.0542	189.415	1.10108	1.10108	6.59389	FALSE	FALSE	9.99189	9.51767	9.04359	22.4281	66.8349	199.105	1.3367	1.3367	8.8775	FALSE	FALSE
Solvent	M6PFDA	519.987	50	0.0961562	2	4.21541e+08	4.38392e+09	2.29362	45.7702	49.9904	54.6112	0.999808	1.00019	1.19316	FALSE	FALSE	4.92642e+09	4.44906e+09	3.8788e+09	44.494	49.268	56.5114	0.985359	1.01486	1.27009	FALSE	FALSE	7.66311e+09	3.99841e+09	1.16215e+09	28.6041	54.8208	188.612	1.09642	1.09642	6.59389	FALSE	FALSE	9.99189	9.51767	9.04359	22.333	66.5516	198.261	1.33103	1.33103	8.8775	FALSE	FALSE
Solvent	M6PFDA	519.987	50	0.0961562	3	4.12931e+08	4.29438e+09	2.29362	44.7858	48.8836	53.3672	0.977672	1.02284	1.19161	FALSE	FALSE	4.92642e+09	4.44906e+09	3.8788e+09	43.5852	48.2616	55.3571	0.965232	1.03602	1.27009	FALSE	FALSE	7.66311e+09	3.99841e+09	1.16215e+09	28.0198	53.701	184.759	1.07402	1.07402	6.59389	FALSE	FALSE	9.99189	9.51767	9.04359	21.8768	65.1922	194.212	1.30384	1.30384	8.8775	FALSE	FALSE
Solvent	M6PFDA	519.987	100	0.192312	1	7.27601e+08	3.78343e+09	2.29362	81.3318	86.2007	91.373	0.862007	1.16008	1.12346	FALSE	TRUE	4.92642e+09	4.44906e+09	3.8788e+09	76.7989	85.039	97.5415	0.85039	1.17593	1.27009	FALSE	TRUE	7.66311e+09	3.99841e+09	1.16215e+09	49.372	94.6235	325.554	0.946235	1.05682	6.59389	FALSE	FALSE	9.99189	9.51767	9.04359	38.5479	114.871	342.209	1.14871	1.14871	8.8775	FALSE	FALSE
Solvent	M6PFDA	519.987	100	0.192312	2	8.09302e+08	4.20827e+09	2.29362	88.8201	96.999	105.964	0.96999	1.03094	1.19302	FALSE	FALSE	4.92642e+09	4.44906e+09	3.8788e+09	85.4225	94.5878	108.494	0.945878	1.05722	1.27009	FALSE	FALSE	7.66311e+09	3.99841e+09	1.16215e+09	54.9159	105.249	362.109	1.05249	1.05249	6.59389	FALSE	FALSE	9.99189	9.51767	9.04359	42.8764	127.77	380.635	1.2777	1.2777	8.8775	FALSE	FALSE
Solvent	M6PFDA	519.987	100	0.192312	3	8.08471e+08	4.20395e+09	2.29362	88.7263	96.8882	105.834	0.968882	1.03212	1.19282	FALSE	FALSE	4.92642e+09	4.44906e+09	3.8788e+09	85.3348	94.4906	108.383	0.944906	1.05831	1.27009	FALSE	FALSE	7.66311e+09	3.99841e+09	1.16215e+09	54.8595	105.14	361.737	1.0514	1.0514	6.59389	FALSE	FALSE	9.99189	9.51767	9.04359	42.8323	127.639	380.244	1.27639	1.27639	8.8775	FALSE	FALSE
Solvent	M6PFDA	519.987	250	0.480781	1	2.0744e+09	4.31465e+09	2.29362	232.43	254.632	279.094	1.01853	1.01853	1.20077	FALSE	FALSE	4.92642e+09	4.44906e+09	3.8788e+09	218.955	242.447	278.092	0.969789	1.03115	1.27009	FALSE	FALSE	7.66311e+09	3.99841e+09	1.16215e+09	140.76	269.773	928.159	1.07909	1.07909	6.59389	FALSE	FALSE	9.99189	9.51767	9.04359	109.901	327.5	975.643	1.31	1.31	8.8775	FALSE	FALSE
Solvent	M6PFDA	519.987	250	0.480781	2	2.08642e+09	4.33964e+09	2.29362	234.079	256.363	280.908	1.02545	1.02545	1.20006	FALSE	FALSE	4.92642e+09	4.44906e+09	3.8788e+09	220.223	243.851	279.703	0.975406	1.02521	1.27009	FALSE	FALSE	7.66311e+09	3.99841e+09	1.16215e+09	141.576	271.335	933.534	1.08534	1.08534	6.59389	FALSE	FALSE	9.99189	9.51767	9.04359	110.537	329.397	981.293	1.31759	1.31759	8.8775	FALSE	FALSE
Solvent	M6PFDA	519.987	250	0.480781	3	2.06702e+09	4.29929e+09	2.29362	231.429	253.569	277.965	1.01427	1.01427	1.20108	FALSE	FALSE	4.92642e+09	4.44906e+09	3.8788e+09	218.175	241.584	277.102	0.966337	1.03484	1.27009	FALSE	FALSE	7.66311e+09	3.99841e+09	1.16215e+09	140.259	268.812	924.854	1.07525	1.07525	6.59389	FALSE	FALSE	9.99189	9.51767	9.04359	109.509	326.334	972.169	1.30534	1.30534	8.8775	FALSE	FALSE
Solvent	M8PFOS	507.964	0.4795	0.000943964	1	8.29418e+06	8.78654e+09	2.47938	0.347857	0.418029	0.501234	0.871802	1.14705	1.44092	FALSE	FALSE	7.67851e+09	4.72145e+09	1.3868e+09	0.548693	0.892341	3.03803	1.86098	1.86098	5.53684	TRUE	FALSE	7.04545e+09	3.99841e+09	1.16215e+09	0.597996	1.05371	3.62529	2.19751	2.19751	6.06241	TRUE	FALSE	10.0597	9.59188	9.12701	0.367215	1.07828	3.14486	2.24875	2.24875	8.56408	FALSE	FALSE
Solvent	M8PFOS	507.964	0.4795	0.000943964	2	8.53502e+06	9.04167e+09	2.47938	0.359218	0.433616	0.522205	0.904308	1.10582	1.45373	FALSE	FALSE	7.67851e+09	4.72145e+09	1.3868e+09	0.564626	0.918252	3.12624	1.91502	1.91502	5.53684	TRUE	FALSE	7.04545e+09	3.99841e+09	1.16215e+09	0.615359	1.0843	3.73056	2.26132	2.26132	6.06241	TRUE	FALSE	10.0597	9.59188	9.12701	0.377877	1.10959	3.23617	2.31405	2.31405	8.56408	FALSE	FALSE
Solvent	M8PFOS	507.964	0.4795	0.000943964	3	8.70936e+06	9.22637e+09	2.47938	0.367804	0.444953	0.53701	0.927952	1.07764	1.46004	FALSE	FALSE	7.67851e+09	4.72145e+09	1.3868e+09	0.57616	0.937009	3.1901	1.95414	1.95414	5.53684	TRUE	FALSE	7.04545e+09	3.99841e+09	1.16215e+09	0.62793	1.10645	3.80677	2.30751	2.30751	6.06241	TRUE	FALSE	10.0597	9.59188	9.12701	0.385597	1.13225	3.30228	2.36132	2.36132	8.56408	FALSE	FALSE
Solvent	M8PFOS	507.964	0.959	0.00188793	1	1.69211e+07	8.9628e+09	2.47938	0.761909	0.918818	1.10604	0.9581	1.04373	1.45167	FALSE	FALSE	7.67851e+09	4.72145e+09	1.3868e+09	1.1194	1.82048	6.19794	1.89831	1.89831	5.53684	TRUE	FALSE	7.04545e+09	3.99841e+09	1.16215e+09	1.21998	2.14968	7.39603	2.24159	2.24159	6.06241	TRUE	FALSE	10.0597	9.59188	9.12701	0.749162	2.19981	6.41588	2.29386	2.29386	8.56408	FALSE	FALSE
Solvent	M8PFOS	507.964	0.959	0.00188793	2	1.68882e+07	8.94536e+09	2.47938	0.76018	0.916647	1.10333	0.955836	1.0462	1.45141	FALSE	FALSE	7.67851e+09	4.72145e+09	1.3868e+09	1.11722	1.81694	6.18588	1.89462	1.89462	5.53684	TRUE	FALSE	7.04545e+09	3.99841e+09	1.16215e+09	1.21761	2.1455	7.38164	2.23723	2.23723	6.06241	TRUE	FALSE	10.0597	9.59188	9.12701	0.747704	2.19553	6.4034	2.2894	2.2894	8.56408	FALSE	FALSE
Solvent	M8PFOS	507.964	0.959	0.00188793	3	1.66508e+07	8.81964e+09	2.47938	0.747864	0.901016	1.08358	0.939537	1.06435	1.44891	FALSE	FALSE	7.67851e+09	4.72145e+09	1.3868e+09	1.10152	1.79141	6.09894	1.86799	1.86799	5.53684	TRUE	FALSE	7.04545e+09	3.99841e+09	1.16215e+09	1.2005	2.11535	7.2779	2.20579	2.20579	6.06241	TRUE	FALSE	10.0597	9.59188	9.12701	0.737196	2.16468	6.31341	2.25722	2.25722	8.56408	FALSE	FALSE
Solvent	M8PFOS	507.964	4.795	0.00943964	1	8.27806e+07	8.76946e+09	2.47938	4.31936	5.16201	6.1656	1.07654	1.07654	1.42743	FALSE	FALSE	7.67851e+09	4.72145e+09	1.3868e+09	5.47627	8.90606	30.3212	1.85736	1.85736	5.53684	TRUE	FALSE	7.04545e+09	3.99841e+09	1.16215e+09	5.96833	10.5166	36.1824	2.19324	2.19324	6.06241	TRUE	FALSE	10.0597	9.59188	9.12701	3.66501	10.7618	31.3874	2.24438	2.24438	8.56408	FALSE	FALSE
Solvent	M8PFOS	507.964	4.795	0.00943964	2	8.35338e+07	8.84926e+09	2.47938	4.36841	5.21549	6.22344	1.08769	1.08769	1.42465	FALSE	FALSE	7.67851e+09	4.72145e+09	1.3868e+09	5.5261	8.9871	30.5971	1.87427	1.87427	5.53684	TRUE	FALSE	7.04545e+09	3.99841e+09	1.16215e+09	6.02264	10.6123	36.5117	2.21319	2.21319	6.06241	TRUE	FALSE	10.0597	9.59188	9.12701	3.69836	10.8597	31.673	2.2648	2.2648	8.56408	FALSE	FALSE
Solvent	M8PFOS	507.964	4.795	0.00943964	3	8.51272e+07	9.01805e+09	2.47938	4.47437	5.32882	6.34315	1.11133	1.11133	1.41766	FALSE	FALSE	7.67851e+09	4.72145e+09	1.3868e+09	5.63151	9.15853	31.1807	1.91002	1.91002	5.53684	TRUE	FALSE	7.04545e+09	3.99841e+09	1.16215e+09	6.13752	10.8147	37.2081	2.25541	2.25541	6.06241	TRUE	FALSE	10.0597	9.59188	9.12701	3.7689	11.0669	32.2772	2.308	2.308	8.56408	FALSE	FALSE
Solvent	M8PFOS	507.964	9.59	0.0188793	1	1.55441e+08	8.23341e+09	2.47938	8.52945	10.195	12.1842	1.06309	1.06309	1.42849	FALSE	FALSE	7.67851e+09	4.72145e+09	1.3868e+09	10.283	16.7233	56.9356	1.74383	1.74383	5.53684	TRUE	FALSE	7.04545e+09	3.99841e+09	1.16215e+09	11.207	19.7475	67.9415	2.05917	2.05917	6.06241	TRUE	FALSE	10.0597	9.59188	9.12701	6.88196	20.2079	58.9376	2.10719	2.10719	8.56408	FALSE	FALSE
Solvent	M8PFOS	507.964	9.59	0.0188793	2	1.61484e+08	8.55349e+09	2.47938	8.94243	10.6437	12.6674	1.10987	1.10987	1.41655	FALSE	FALSE	7.67851e+09	4.72145e+09	1.3868e+09	10.6828	17.3735	59.149	1.81162	1.81162	5.53684	TRUE	FALSE	7.04545e+09	3.99841e+09	1.16215e+09	11.6427	20.5152	70.5828	2.13922	2.13922	6.06241	TRUE	FALSE	10.0597	9.59188	9.12701	7.1495	20.9935	61.2289	2.18911	2.18911	8.56408	FALSE	FALSE
Solvent	M8PFOS	507.964	9.59	0.0188793	3	1.6246e+08	8.60521e+09	2.47938	9.0114	10.7164	12.7428	1.11745	1.11745	1.41407	FALSE	FALSE	7.67851e+09	4.72145e+09	1.3868e+09	10.7474	17.4785	59.5066	1.82258	1.82258	5.53684	TRUE	FALSE	7.04545e+09	3.99841e+09	1.16215e+09	11.7131	20.6392	71.0095	2.15216	2.15216	6.06241	TRUE	FALSE	10.0597	9.59188	9.12701	7.19273	21.1205	61.5991	2.20234	2.20234	8.56408	FALSE	FALSE
Solvent	M8PFOS	507.964	23.975	0.0471982	1	3.77563e+08	7.99952e+09	2.47938	22.428	26.6956	31.79	1.11348	1.11348	1.41742	FALSE	FALSE	7.67851e+09	4.72145e+09	1.3868e+09	24.9773	40.6206	138.295	1.69429	1.69429	5.53684	TRUE	FALSE	7.04545e+09	3.99841e+09	1.16215e+09	27.2216	47.9662	165.028	2.00067	2.00067	6.06241	TRUE	FALSE	10.0597	9.59188	9.12701	16.7161	49.0846	143.158	2.04733	2.04733	8.56408	FALSE	FALSE
Solvent	M8PFOS	507.964	23.975	0.0471982	2	3.75147e+08	7.94832e+09	2.47938	22.2456	26.5017	31.5867	1.10539	1.10539	1.41991	FALSE	FALSE	7.67851e+09	4.72145e+09	1.3868e+09	24.8175	40.3607	137.41	1.68345	1.68345	5.53684	TRUE	FALSE	7.04545e+09	3.99841e+09	1.16215e+09	27.0474	47.6592	163.972	1.98787	1.98787	6.06241	TRUE	FALSE	10.0597	9.59188	9.12701	16.6092	48.7705	142.242	2.03422	2.03422	8.56408	FALSE	FALSE
Solvent	M8PFOS	507.964	23.975	0.0471982	3	3.738e+08	7.9198e+09	2.47938	22.1448	26.3937	31.4725	1.10088	1.10088	1.42122	FALSE	FALSE	7.67851e+09	4.72145e+09	1.3868e+09	24.7284	40.2158	136.917	1.67741	1.67741	5.53684	TRUE	FALSE	7.04545e+09	3.99841e+09	1.16215e+09	26.9503	47.4881	163.384	1.98074	1.98074	6.06241	TRUE	FALSE	10.0597	9.59188	9.12701	16.5495	48.5955	141.732	2.02692	2.02692	8.56408	FALSE	FALSE
Solvent	M8PFOS	507.964	47.95	0.0943964	1	6.67632e+08	7.07264e+09	2.47938	41.1158	49.2958	59.1571	1.02807	1.02807	1.43879	FALSE	FALSE	7.67851e+09	4.72145e+09	1.3868e+09	44.1665	71.8281	244.543	1.49798	1.49798	5.53684	FALSE	FALSE	7.04545e+09	3.99841e+09	1.16215e+09	48.1351	84.817	291.814	1.76886	1.76886	6.06241	TRUE	FALSE	10.0597	9.59188	9.12701	29.5586	86.7948	253.142	1.81011	1.81011	8.56408	FALSE	FALSE
Solvent	M8PFOS	507.964	47.95	0.0943964	2	6.6857e+08	7.08258e+09	2.47938	41.1842	49.3756	59.2503	1.02973	1.02973	1.43866	FALSE	FALSE	7.67851e+09	4.72145e+09	1.3868e+09	44.2286	71.9291	244.887	1.50008	1.50008	5.53684	FALSE	FALSE	7.04545e+09	3.99841e+09	1.16215e+09	48.2027	84.9362	292.224	1.77135	1.77135	6.06241	TRUE	FALSE	10.0597	9.59188	9.12701	29.6001	86.9167	253.498	1.81265	1.81265	8.56408	FALSE	FALSE
Solvent	M8PFOS	507.964	47.95	0.0943964	3	6.58854e+08	6.97965e+09	2.47938	40.4828	48.5501	58.2779	1.01252	1.01252	1.43957	FALSE	FALSE	7.67851e+09	4.72145e+09	1.3868e+09	43.5858	70.8837	241.328	1.47828	1.47828	5.53684	FALSE	FALSE	7.04545e+09	3.99841e+09	1.16215e+09	47.5022	83.7018	287.977	1.74561	1.74561	6.06241	FALSE	FALSE	10.0597	9.59188	9.12701	29.1699	85.6535	249.814	1.78631	1.78631	8.56408	FALSE	FALSE
Solvent	M8PFOS	507.964	95.9	0.188793	1	1.07735e+09	5.70651e+09	2.47938	68.9522	81.5167	96.4743	0.850018	1.17645	1.39915	FALSE	FALSE	7.67851e+09	4.72145e+09	1.3868e+09	71.2709	115.908	394.615	1.20863	1.20863	5.53684	FALSE	FALSE	7.04545e+09	3.99841e+09	1.16215e+09	77.6748	136.868	470.896	1.42719	1.42719	6.06241	FALSE	FALSE	10.0597	9.59188	9.12701	47.6982	140.059	408.492	1.46047	1.46047	8.56408	FALSE	FALSE
Solvent	M8PFOS	507.964	95.9	0.188793	2	1.19778e+09	6.34439e+09	2.47938	76.9094	92.3317	110.997	0.962792	1.03865	1.44322	FALSE	FALSE	7.67851e+09	4.72145e+09	1.3868e+09	79.2377	128.864	438.726	1.34374	1.34374	5.53684	FALSE	FALSE	7.04545e+09	3.99841e+09	1.16215e+09	86.3575	152.167	523.534	1.58673	1.58673	6.06241	FALSE	FALSE	10.0597	9.59188	9.12701	53.03	155.715	454.154	1.62373	1.62373	8.56408	FALSE	FALSE
Solvent	M8PFOS	507.964	95.9	0.188793	3	1.18274e+09	6.26475e+09	2.47938	75.8382	90.9676	109.261	0.948567	1.05422	1.44071	FALSE	FALSE	7.67851e+09	4.72145e+09	1.3868e+09	78.243	127.247	433.219	1.32687	1.32687	5.53684	FALSE	FALSE	7.04545e+09	3.99841e+09	1.16215e+09	85.2734	150.257	516.962	1.56681	1.56681	6.06241	FALSE	FALSE	10.0597	9.59188	9.12701	52.3644	153.761	448.453	1.60335	1.60335	8.56408	FALSE	FALSE
Solvent	M8PFOS	507.964	239.75	0.471982	1	2.68482e+09	5.6884e+09	2.47938	182.632	219.304	263.855	0.914719	1.09323	1.44474	FALSE	FALSE	7.67851e+09	4.72145e+09	1.3868e+09	177.612	288.85	983.408	1.2048	1.2048	5.53684	FALSE	FALSE	7.04545e+09	3.99841e+09	1.16215e+09	193.571	341.084	1173.51	1.42266	1.42266	6.06241	FALSE	FALSE	10.0597	9.59188	9.12701	118.867	349.037	1017.99	1.45584	1.45584	8.56408	FALSE	FALSE
Solvent	M8PFOS	507.964	239.75	0.471982	2	2.67322e+09	5.66381e+09	2.47938	181.766	218.133	262.285	0.909834	1.0991	1.44298	FALSE	FALSE	7.67851e+09	4.72145e+09	1.3868e+09	176.844	287.602	979.157	1.19959	1.19959	5.53684	FALSE	FALSE	7.04545e+09	3.99841e+09	1.16215e+09	192.734	339.609	1168.43	1.41651	1.41651	6.06241	FALSE	FALSE	10.0597	9.59188	9.12701	118.353	347.528	1013.59	1.44955	1.44955	8.56408	FALSE	FALSE
Solvent	M8PFOS	507.964	239.75	0.471982	3	2.68575e+09	5.69036e+09	2.47938	182.701	219.397	263.98	0.915108	1.09277	1.44487	FALSE	FALSE	7.67851e+09	4.72145e+09	1.3868e+09	177.673	288.95	983.747	1.20521	1.20521	5.53684	FALSE	FALSE	7.04545e+09	3.99841e+09	1.16215e+09	193.638	341.201	1173.91	1.42315	1.42315	6.06241	FALSE	FALSE	10.0597	9.59188	9.12701	118.908	349.158	1018.34	1.45634	1.45634	8.56408	FALSE	FALSE
Solvent	M7PFUdA	570.988	0.5	0.000875676	1	4.04309e+06	4.61711e+09	1.84528	0.43452	0.478735	0.527126	0.957471	1.04442	1.21312	FALSE	FALSE	4.73583e+09	4.37832e+09	3.92562e+09	0.487466	0.527269	0.588073	1.05454	1.05454	1.20639	FALSE	FALSE	7.65524e+09	4.01998e+09	1.16137e+09	0.301565	0.57427	1.98778	1.14854	1.14854	6.59155	FALSE	FALSE	9.77692	9.3006	8.82198	0.385852	1.15541	3.47821	2.31083	2.31083	9.01436	FALSE	FALSE
Solvent	M7PFUdA	570.988	0.5	0.000875676	2	4.12663e+06	4.7125e+09	1.84528	0.444596	0.490556	0.540927	0.981111	1.01925	1.21667	FALSE	FALSE	4.73583e+09	4.37832e+09	3.92562e+09	0.497538	0.538164	0.600224	1.07633	1.07633	1.20639	FALSE	FALSE	7.65524e+09	4.01998e+09	1.16137e+09	0.307796	0.586135	2.02885	1.17227	1.17227	6.59155	FALSE	FALSE	9.77692	9.3006	8.82198	0.393824	1.17929	3.55007	2.35857	2.35857	9.01436	FALSE	FALSE
Solvent	M7PFUdA	570.988	0.5	0.000875676	3	4.20728e+06	4.80461e+09	1.84528	0.454864	0.501994	0.55366	1.00399	1.00399	1.2172	FALSE	FALSE	4.73583e+09	4.37832e+09	3.92562e+09	0.507262	0.548682	0.611956	1.09736	1.09736	1.20639	TRUE	FALSE	7.65524e+09	4.01998e+09	1.16137e+09	0.313812	0.597591	2.06851	1.19518	1.19518	6.59155	FALSE	FALSE	9.77692	9.3006	8.82198	0.401522	1.20234	3.61946	2.40467	2.40467	9.01436	FALSE	FALSE
Solvent	M7PFUdA	570.988	1	0.00175135	1	8.05692e+06	4.6004e+09	1.84528	0.878596	0.966362	1.0624	0.966362	1.03481	1.2092	FALSE	FALSE	4.73583e+09	4.37832e+09	3.92562e+09	0.971404	1.05072	1.17189	1.05072	1.05072	1.20639	FALSE	FALSE	7.65524e+09	4.01998e+09	1.16137e+09	0.600948	1.14438	3.96118	1.14438	1.14438	6.59155	FALSE	FALSE	9.77692	9.3006	8.82198	0.768912	2.30247	6.93125	2.30247	2.30247	9.01436	FALSE	FALSE
Solvent	M7PFUdA	570.988	1	0.00175135	2	8.18249e+06	4.6721e+09	1.84528	0.893406	0.983519	1.08221	0.983519	1.01676	1.21133	FALSE	FALSE	4.73583e+09	4.37832e+09	3.92562e+09	0.986543	1.0671	1.19015	1.0671	1.0671	1.20639	FALSE	FALSE	7.65524e+09	4.01998e+09	1.16137e+09	0.610314	1.16222	4.02292	1.16222	1.16222	6.59155	FALSE	FALSE	9.77692	9.3006	8.82198	0.780895	2.33835	7.03927	2.33835	2.33835	9.01436	FALSE	FALSE
Solvent	M7PFUdA	570.988	1	0.00175135	3	8.14045e+06	4.6481e+09	1.84528	0.888381	0.977773	1.07565	0.977773	1.02273	1.2108	FALSE	FALSE	4.73583e+09	4.37832e+09	3.92562e+09	0.981476	1.06162	1.18404	1.06162	1.06162	1.20639	FALSE	FALSE	7.65524e+09	4.01998e+09	1.16137e+09	0.607179	1.15625	4.00225	1.15625	1.15625	6.59155	FALSE	FALSE	9.77692	9.3006	8.82198	0.776884	2.32634	7.00311	2.32634	2.32634	9.01436	FALSE	FALSE
Solvent	M7PFUdA	570.988	5	0.00875676	1	4.18511e+07	4.77929e+09	1.84528	4.7159	5.17006	5.66707	1.03401	1.03401	1.20169	FALSE	FALSE	4.73583e+09	4.37832e+09	3.92562e+09	5.04589	5.45791	6.08731	1.09158	1.09158	1.20639	TRUE	FALSE	7.65524e+09	4.01998e+09	1.16137e+09	3.12158	5.94442	20.5761	1.18888	1.18888	6.59155	FALSE	FALSE	9.77692	9.3006	8.82198	3.99406	11.96	36.0039	2.392	2.392	9.01436	FALSE	FALSE
Solvent	M7PFUdA	570.988	5	0.00875676	2	4.18965e+07	4.78447e+09	1.84528	4.72179	5.17605	5.67313	1.03521	1.03521	1.20148	FALSE	FALSE	4.73583e+09	4.37832e+09	3.92562e+09	5.05136	5.46383	6.09391	1.09277	1.09277	1.20639	TRUE	FALSE	7.65524e+09	4.01998e+09	1.16137e+09	3.12497	5.95087	20.5984	1.19017	1.19017	6.59155	FALSE	FALSE	9.77692	9.3006	8.82198	3.99839	11.973	36.0429	2.39459	2.39459	9.01436	FALSE	FALSE
Solvent	M7PFUdA	570.988	5	0.00875676	3	4.28328e+07	4.8914e+09	1.84528	4.84685	5.29967	5.79397	1.05993	1.05993	1.19541	FALSE	FALSE	4.73583e+09	4.37832e+09	3.92562e+09	5.16425	5.58594	6.2301	1.11719	1.11719	1.20639	TRUE	FALSE	7.65524e+09	4.01998e+09	1.16137e+09	3.19481	6.08386	21.0587	1.21677	1.21677	6.59155	FALSE	FALSE	9.77692	9.3006	8.82198	4.08775	12.2405	36.8484	2.44811	2.44811	9.01436	FALSE	FALSE
Solvent	M7PFUdA	570.988	10	0.0175135	1	7.94617e+07	4.53717e+09	1.84528	9.01257	9.88747	10.8468	0.988747	1.01138	1.20352	FALSE	FALSE	4.73583e+09	4.37832e+09	3.92562e+09	9.58052	10.3628	11.5578	1.03628	1.03628	1.20639	FALSE	FALSE	7.65524e+09	4.01998e+09	1.16137e+09	5.92688	11.2865	39.0673	1.12865	1.12865	6.59155	FALSE	FALSE	9.77692	9.3006	8.82198	7.58342	22.7082	68.3597	2.27082	2.27082	9.01436	FALSE	FALSE
Solvent	M7PFUdA	570.988	10	0.0175135	2	8.33865e+07	4.76127e+09	1.84528	9.50059	10.4056	11.3964	1.04056	1.04056	1.19955	FALSE	FALSE	4.73583e+09	4.37832e+09	3.92562e+09	10.0537	10.8746	12.1287	1.08746	1.08746	1.20639	TRUE	FALSE	7.65524e+09	4.01998e+09	1.16137e+09	6.21962	11.844	40.9969	1.1844	1.1844	6.59155	FALSE	FALSE	9.77692	9.3006	8.82198	7.95799	23.8298	71.7362	2.38298	2.38298	9.01436	FALSE	FALSE
Solvent	M7PFUdA	570.988	10	0.0175135	3	8.2196e+07	4.69329e+09	1.84528	9.34658	10.2483	11.2365	1.02483	1.02483	1.20221	FALSE	FALSE	4.73583e+09	4.37832e+09	3.92562e+09	9.91018	10.7194	11.9555	1.07194	1.07194	1.20639	FALSE	FALSE	7.65524e+09	4.01998e+09	1.16137e+09	6.13082	11.6749	40.4116	1.16749	1.16749	6.59155	FALSE	FALSE	9.77692	9.3006	8.82198	7.84437	23.4896	70.712	2.34896	2.34896	9.01436	FALSE	FALSE
Solvent	M7PFUdA	570.988	25	0.0437838	1	2.08884e+08	4.77081e+09	1.84528	24.1822	26.4435	28.9196	1.05774	1.05774	1.1959	FALSE	FALSE	4.73583e+09	4.37832e+09	3.92562e+09	25.1847	27.2411	30.3825	1.08964	1.08964	1.20639	TRUE	FALSE	7.65524e+09	4.01998e+09	1.16137e+09	15.5802	29.6694	102.698	1.18677	1.18677	6.59155	FALSE	FALSE	9.77692	9.3006	8.82198	19.9348	59.6939	179.7	2.38775	2.38775	9.01436	FALSE	FALSE
Solvent	M7PFUdA	570.988	25	0.0437838	2	2.05723e+08	4.6986e+09	1.84528	23.7511	26.0178	28.5041	1.04071	1.04071	1.20012	FALSE	FALSE	4.73583e+09	4.37832e+09	3.92562e+09	24.8035	26.8288	29.9227	1.07315	1.07315	1.20639	FALSE	FALSE	7.65524e+09	4.01998e+09	1.16137e+09	15.3444	29.2203	101.143	1.16881	1.16881	6.59155	FALSE	FALSE	9.77692	9.3006	8.82198	19.6331	58.7904	176.98	2.35162	2.35162	9.01436	FALSE	FALSE
Solvent	M7PFUdA	570.988	25	0.0437838	3	2.05973e+08	4.70433e+09	1.84528	23.7847	26.0515	28.5377	1.04206	1.04206	1.19983	FALSE	FALSE	4.73583e+09	4.37832e+09	3.92562e+09	24.8337	26.8615	29.9591	1.07446	1.07446	1.20639	FALSE	FALSE	7.65524e+09	4.01998e+09	1.16137e+09	15.3631	29.2559	101.267	1.17024	1.17024	6.59155	FALSE	FALSE	9.77692	9.3006	8.82198	19.6571	58.862	177.196	2.35448	2.35448	9.01436	FALSE	FALSE
Solvent	M7PFUdA	570.988	50	0.0875676	1	3.85784e+08	4.40556e+09	1.84528	44.7327	49.0974	53.9004	0.981948	1.01838	1.20494	FALSE	FALSE	4.73583e+09	4.37832e+09	3.92562e+09	46.5131	50.3111	56.1129	1.00622	1.00622	1.20639	FALSE	FALSE	7.65524e+09	4.01998e+09	1.16137e+09	28.7748	54.7958	189.671	1.09592	1.09592	6.59155	FALSE	FALSE	9.77692	9.3006	8.82198	36.8173	110.248	331.885	2.20495	2.20495	9.01436	FALSE	FALSE
Solvent	M7PFUdA	570.988	50	0.0875676	2	3.89593e+08	4.44906e+09	1.84528	45.1947	49.6206	54.4929	0.992413	1.00765	1.20574	FALSE	FALSE	4.73583e+09	4.37832e+09	3.92562e+09	46.9724	50.8079	56.6669	1.01616	1.01616	1.20639	FALSE	FALSE	7.65524e+09	4.01998e+09	1.16137e+09	29.0589	55.3368	191.543	1.10674	1.10674	6.59155	FALSE	FALSE	9.77692	9.3006	8.82198	37.1808	111.336	335.161	2.22672	2.22672	9.01436	FALSE	FALSE
Solvent	M7PFUdA	570.988	50	0.0875676	3	3.7965e+08	4.3355e+09	1.84528	44.0131	48.2558	52.9194	0.965116	1.03615	1.20236	FALSE	FALSE	4.73583e+09	4.37832e+09	3.92562e+09	45.7735	49.511	55.2206	0.990221	1.00988	1.20639	FALSE	FALSE	7.65524e+09	4.01998e+09	1.16137e+09	28.3172	53.9244	186.655	1.07849	1.07849	6.59155	FALSE	FALSE	9.77692	9.3006	8.82198	36.2318	108.494	326.607	2.16989	2.16989	9.01436	FALSE	FALSE
Solvent	M7PFUdA	570.988	100	0.175135	1	6.75811e+08	3.8588e+09	1.84528	80.4698	85.7415	91.3726	0.857415	1.1663	1.13549	FALSE	TRUE	4.73583e+09	4.37832e+09	3.92562e+09	81.481	88.1342	98.2977	0.881342	1.13463	1.20639	FALSE	TRUE	7.65524e+09	4.01998e+09	1.16137e+09	50.4073	95.9904	332.262	0.959904	1.04177	6.59155	FALSE	FALSE	9.77692	9.3006	8.82198	64.496	193.13	581.39	1.9313	1.9313	9.01436	FALSE	FALSE
Solvent	M7PFUdA	570.988	100	0.175135	2	7.57479e+08	4.32511e+09	1.84528	88.5429	97.2388	106.827	0.972388	1.0284	1.2065	FALSE	FALSE	4.73583e+09	4.37832e+09	3.92562e+09	91.3275	98.7847	110.176	0.987847	1.0123	1.20639	FALSE	FALSE	7.65524e+09	4.01998e+09	1.16137e+09	56.4987	107.59	372.414	1.0759	1.0759	6.59155	FALSE	FALSE	9.77692	9.3006	8.82198	72.29	216.469	651.648	2.16469	2.16469	9.01436	FALSE	FALSE
Solvent	M7PFUdA	570.988	100	0.175135	3	7.62942e+08	4.3563e+09	1.84528	89.2097	98.0148	107.728	0.980148	1.02025	1.20758	FALSE	FALSE	4.73583e+09	4.37832e+09	3.92562e+09	91.9862	99.4972	110.971	0.994972	1.00505	1.20639	FALSE	FALSE	7.65524e+09	4.01998e+09	1.16137e+09	56.9062	108.366	375.1	1.08366	1.08366	6.59155	FALSE	FALSE	9.77692	9.3006	8.82198	72.8113	218.03	656.348	2.1803	2.1803	9.01436	FALSE	FALSE
Solvent	M7PFUdA	570.988	250	0.437838	1	1.95674e+09	4.4691e+09	1.84528	232.534	256.1	282.214	1.0244	1.0244	1.21365	FALSE	FALSE	4.73583e+09	4.37832e+09	3.92562e+09	235.92	255.183	284.611	1.02073	1.02073	1.20639	FALSE	FALSE	7.65524e+09	4.01998e+09	1.16137e+09	145.949	277.93	962.03	1.11172	1.11172	6.59155	FALSE	FALSE	9.77692	9.3006	8.82198	186.741	559.187	1683.35	2.23675	2.23675	9.01436	FALSE	FALSE
Solvent	M7PFUdA	570.988	250	0.437838	2	1.93465e+09	4.41865e+09	1.84528	229.379	252.731	278.616	1.01092	1.01092	1.21466	FALSE	FALSE	4.73583e+09	4.37832e+09	3.92562e+09	233.256	252.303	281.398	1.00921	1.00921	1.20639	FALSE	FALSE	7.65524e+09	4.01998e+09	1.16137e+09	144.301	274.793	951.171	1.09917	1.09917	6.59155	FALSE	FALSE	9.77692	9.3006	8.82198	184.633	552.875	1664.35	2.2115	2.2115	9.01436	FALSE	FALSE
Solvent	M7PFUdA	570.988	250	0.437838	3	1.96739e+09	4.49341e+09	1.84528	234.089	257.728	283.912	1.03091	1.03091	1.21284	FALSE	FALSE	4.73583e+09	4.37832e+09	3.92562e+09	237.203	256.572	286.159	1.02629	1.02629	1.20639	FALSE	FALSE	7.65524e+09	4.01998e+09	1.16137e+09	146.743	279.442	967.264	1.11777	1.11777	6.59155	FALSE	FALSE	9.77692	9.3006	8.82198	187.757	562.23	1692.51	2.24892	2.24892	9.01436	FALSE	FALSE
Solvent	d3-N-MeFOSAA	573.993	0.5	0.00087109	1	1.81159e+06	2.07968e+09	2.25662	0.480313	0.535009	0.595493	1.07002	1.07002	1.2398	FALSE	FALSE	8.92877e+09	7.12819e+09	1.94447e+09	0.11646	0.145877	0.534768	0.291755	3.42754	4.59187	FALSE	FALSE	7.66434e+09	4.1196e+09	1.16364e+09	0.135673	0.252413	0.89361	0.504826	1.98088	6.58651	FALSE	FALSE	9.9863	9.5155	9.04542	0.107316	0.317295	0.936583	0.634589	1.57582	8.72735	FALSE	FALSE
Solvent	d3-N-MeFOSAA	573.993	0.5	0.00087109	2	1.76233e+06	2.02313e+09	2.25662	0.463616	0.518154	0.578649	1.03631	1.03631	1.24812	FALSE	FALSE	8.92877e+09	7.12819e+09	1.94447e+09	0.113293	0.14191	0.520226	0.283821	3.52335	4.59187	FALSE	FALSE	7.66434e+09	4.1196e+09	1.16364e+09	0.131983	0.245549	0.86931	0.491099	2.03625	6.58651	FALSE	FALSE	9.9863	9.5155	9.04542	0.104398	0.308666	0.911114	0.617333	1.61987	8.72735	FALSE	FALSE
Solvent	d3-N-MeFOSAA	573.993	0.5	0.00087109	3	1.76598e+06	2.02732e+09	2.25662	0.464818	0.519401	0.579937	1.0388	1.0388	1.24767	FALSE	FALSE	8.92877e+09	7.12819e+09	1.94447e+09	0.113527	0.142204	0.521303	0.284409	3.51607	4.59187	FALSE	FALSE	7.66434e+09	4.1196e+09	1.16364e+09	0.132257	0.246058	0.871111	0.492116	2.03204	6.58651	FALSE	FALSE	9.9863	9.5155	9.04542	0.104614	0.309305	0.913001	0.618611	1.61652	8.72735	FALSE	FALSE
Solvent	d3-N-MeFOSAA	573.993	1	0.00174218	1	3.39893e+06	1.95096e+09	2.25662	0.885537	0.988442	1.10262	0.988442	1.01169	1.24515	FALSE	FALSE	8.92877e+09	7.12819e+09	1.94447e+09	0.218503	0.273697	1.00334	0.273697	3.65368	4.59187	FALSE	FALSE	7.66434e+09	4.1196e+09	1.16364e+09	0.254551	0.473581	1.6766	0.473581	2.11157	6.58651	FALSE	FALSE	9.9863	9.5155	9.04542	0.201347	0.595312	1.75723	0.595312	1.67979	8.72735	FALSE	FALSE
Solvent	d3-N-MeFOSAA	573.993	1	0.00174218	2	3.43794e+06	1.97335e+09	2.25662	0.896805	1.00107	1.11678	1.00107	1.00107	1.24528	FALSE	FALSE	8.92877e+09	7.12819e+09	1.94447e+09	0.221011	0.276838	1.01485	0.276838	3.61222	4.59187	FALSE	FALSE	7.66434e+09	4.1196e+09	1.16364e+09	0.257472	0.479016	1.69584	0.479016	2.08761	6.58651	FALSE	FALSE	9.9863	9.5155	9.04542	0.203658	0.602144	1.7774	0.602144	1.66073	8.72735	FALSE	FALSE
Solvent	d3-N-MeFOSAA	573.993	1	0.00174218	3	3.36868e+06	1.9336e+09	2.25662	0.876992	0.978654	1.09143	0.978654	1.02181	1.24451	FALSE	FALSE	8.92877e+09	7.12819e+09	1.94447e+09	0.216559	0.271261	0.99441	0.271261	3.68648	4.59187	FALSE	TRUE	7.66434e+09	4.1196e+09	1.16364e+09	0.252286	0.469366	1.66168	0.469366	2.13053	6.58651	FALSE	FALSE	9.9863	9.5155	9.04542	0.199556	0.590014	1.74159	0.590014	1.69487	8.72735	FALSE	FALSE
Solvent	d3-N-MeFOSAA	573.993	5	0.0087109	1	1.68134e+07	1.93016e+09	2.25662	4.35029	4.83405	5.37044	0.966811	1.03433	1.2345	FALSE	FALSE	8.92877e+09	7.12819e+09	1.94447e+09	1.08087	1.35389	4.9632	0.270778	3.69306	4.59187	FALSE	TRUE	7.66434e+09	4.1196e+09	1.16364e+09	1.25918	2.34265	8.29362	0.468531	2.13433	6.58651	FALSE	FALSE	9.9863	9.5155	9.04542	0.996001	2.94482	8.69245	0.588964	1.6979	8.72735	FALSE	FALSE
Solvent	d3-N-MeFOSAA	573.993	5	0.0087109	2	1.73184e+07	1.98812e+09	2.25662	4.48247	4.98609	5.54511	0.997218	1.00279	1.23707	FALSE	FALSE	8.92877e+09	7.12819e+09	1.94447e+09	1.11333	1.39455	5.11225	0.27891	3.58539	4.59187	FALSE	FALSE	7.66434e+09	4.1196e+09	1.16364e+09	1.297	2.41301	8.54269	0.482601	2.0721	6.58651	FALSE	FALSE	9.9863	9.5155	9.04542	1.02591	3.03326	8.95349	0.606651	1.64839	8.72735	FALSE	FALSE
Solvent	d3-N-MeFOSAA	573.993	5	0.0087109	3	1.75869e+07	2.01895e+09	2.25662	4.5561	5.067	5.63399	1.0134	1.0134	1.23658	FALSE	FALSE	8.92877e+09	7.12819e+09	1.94447e+09	1.13059	1.41617	5.19152	0.283235	3.53064	4.59187	FALSE	FALSE	7.66434e+09	4.1196e+09	1.16364e+09	1.31711	2.45042	8.67515	0.490084	2.04047	6.58651	FALSE	FALSE	9.9863	9.5155	9.04542	1.04182	3.08029	9.09232	0.616058	1.62322	8.72735	FALSE	FALSE
Solvent	d3-N-MeFOSAA	573.993	10	0.0174218	1	3.23367e+07	1.85611e+09	2.25662	8.36341	9.24054	10.209	0.924054	1.08219	1.22068	FALSE	FALSE	8.92877e+09	7.12819e+09	1.94447e+09	2.07879	2.6039	9.54556	0.26039	3.8404	4.59187	FALSE	TRUE	7.66434e+09	4.1196e+09	1.16364e+09	2.42175	4.50555	15.9509	0.450555	2.21948	6.58651	FALSE	FALSE	9.9863	9.5155	9.04542	1.91558	5.66367	16.7179	0.566367	1.76564	8.72735	FALSE	FALSE
Solvent	d3-N-MeFOSAA	573.993	10	0.0174218	2	3.45663e+07	1.98408e+09	2.25662	8.90767	9.90225	11.0072	0.990225	1.00987	1.2357	FALSE	FALSE	8.92877e+09	7.12819e+09	1.94447e+09	2.22212	2.78343	10.2037	0.278343	3.59269	4.59187	FALSE	FALSE	7.66434e+09	4.1196e+09	1.16364e+09	2.58872	4.8162	17.0506	0.48162	2.07633	6.58651	FALSE	FALSE	9.9863	9.5155	9.04542	2.04765	6.05417	17.8706	0.605417	1.65175	8.72735	FALSE	FALSE
Solvent	d3-N-MeFOSAA	573.993	10	0.0174218	3	3.4724e+07	1.99314e+09	2.25662	8.94926	9.94912	11.0601	0.994912	1.00511	1.23586	FALSE	FALSE	8.92877e+09	7.12819e+09	1.94447e+09	2.23226	2.79613	10.2503	0.279613	3.57637	4.59187	FALSE	FALSE	7.66434e+09	4.1196e+09	1.16364e+09	2.60053	4.83818	17.1285	0.483818	2.06689	6.58651	FALSE	FALSE	9.9863	9.5155	9.04542	2.057	6.0818	17.9521	0.60818	1.64425	8.72735	FALSE	FALSE
Solvent	d3-N-MeFOSAA	573.993	25	0.0435545	1	8.68973e+07	1.99514e+09	2.25662	22.2495	24.7353	27.5029	0.989413	1.0107	1.23612	FALSE	FALSE	8.92877e+09	7.12819e+09	1.94447e+09	5.58627	6.99735	25.6514	0.279894	3.57278	4.59187	FALSE	FALSE	7.66434e+09	4.1196e+09	1.16364e+09	6.50787	12.1076	42.8641	0.484304	2.06482	6.58651	FALSE	FALSE	9.9863	9.5155	9.04542	5.14766	15.2198	44.9254	0.608791	1.6426	8.72735	FALSE	FALSE
Solvent	d3-N-MeFOSAA	573.993	25	0.0435545	2	8.84793e+07	2.03146e+09	2.25662	22.6697	25.2043	28.0264	1.00817	1.00817	1.23629	FALSE	FALSE	8.92877e+09	7.12819e+09	1.94447e+09	5.68797	7.12474	26.1184	0.28499	3.5089	4.59187	FALSE	FALSE	7.66434e+09	4.1196e+09	1.16364e+09	6.62634	12.328	43.6445	0.493121	2.0279	6.58651	FALSE	FALSE	9.9863	9.5155	9.04542	5.24137	15.4969	45.7433	0.619874	1.61323	8.72735	FALSE	FALSE
Solvent	d3-N-MeFOSAA	573.993	25	0.0435545	3	8.9116e+07	2.04608e+09	2.25662	22.8433	25.3932	28.2319	1.01573	1.01573	1.23589	FALSE	FALSE	8.92877e+09	7.12819e+09	1.94447e+09	5.72889	7.17601	26.3064	0.28704	3.48383	4.59187	FALSE	FALSE	7.66434e+09	4.1196e+09	1.16364e+09	6.67403	12.4167	43.9585	0.496669	2.01341	6.58651	FALSE	FALSE	9.9863	9.5155	9.04542	5.27909	15.6084	46.0724	0.624335	1.6017	8.72735	FALSE	FALSE
Solvent	d3-N-MeFOSAA	573.993	50	0.087109	1	1.73395e+08	1.99055e+09	2.25662	44.1406	49.0947	54.6213	0.981894	1.01844	1.23744	FALSE	FALSE	8.92877e+09	7.12819e+09	1.94447e+09	11.1469	13.9625	51.1849	0.279251	3.58101	4.59187	FALSE	FALSE	7.66434e+09	4.1196e+09	1.16364e+09	12.9858	24.1595	85.5312	0.483191	2.06958	6.58651	FALSE	FALSE	9.9863	9.5155	9.04542	10.2717	30.3696	89.6443	0.607392	1.64638	8.72735	FALSE	FALSE
Solvent	d3-N-MeFOSAA	573.993	50	0.087109	2	1.73922e+08	1.9966e+09	2.25662	44.2773	49.2521	54.8027	0.985043	1.01518	1.23772	FALSE	FALSE	8.92877e+09	7.12819e+09	1.94447e+09	11.1807	14.0049	51.3403	0.280099	3.57017	4.59187	FALSE	FALSE	7.66434e+09	4.1196e+09	1.16364e+09	13.0252	24.2329	85.791	0.484658	2.06331	6.58651	FALSE	FALSE	9.9863	9.5155	9.04542	10.3028	30.4618	89.9165	0.609236	1.6414	8.72735	FALSE	FALSE
Solvent	d3-N-MeFOSAA	573.993	50	0.087109	3	1.72463e+08	1.97985e+09	2.25662	43.901	48.8161	54.2977	0.976321	1.02425	1.23682	FALSE	FALSE	8.92877e+09	7.12819e+09	1.94447e+09	11.0869	13.8875	50.9098	0.27775	3.60037	4.59187	FALSE	FALSE	7.66434e+09	4.1196e+09	1.16364e+09	12.916	24.0297	85.0715	0.480593	2.08076	6.58651	FALSE	FALSE	9.9863	9.5155	9.04542	10.2164	30.2063	89.1624	0.604127	1.65528	8.72735	FALSE	FALSE
Solvent	d3-N-MeFOSAA	573.993	100	0.174218	1	3.09117e+08	1.77431e+09	2.25662	79.2818	86.2353	93.824	0.862353	1.15962	1.18342	FALSE	TRUE	8.92877e+09	7.12819e+09	1.94447e+09	19.8719	24.8915	91.2491	0.248915	4.01744	4.59187	FALSE	TRUE	7.66434e+09	4.1196e+09	1.16364e+09	23.1503	43.07	152.479	0.4307	2.3218	6.58651	FALSE	FALSE	9.9863	9.5155	9.04542	18.3116	54.1409	159.812	0.541409	1.84703	8.72735	FALSE	FALSE
Solvent	d3-N-MeFOSAA	573.993	100	0.174218	2	3.52951e+08	2.02591e+09	2.25662	89.3315	99.5174	110.918	0.995174	1.00485	1.24164	FALSE	FALSE	8.92877e+09	7.12819e+09	1.94447e+09	22.6897	28.4211	104.188	0.284211	3.51851	4.59187	FALSE	FALSE	7.66434e+09	4.1196e+09	1.16364e+09	26.433	49.1774	174.101	0.491774	2.03345	6.58651	FALSE	FALSE	9.9863	9.5155	9.04542	20.9082	61.8182	182.473	0.618182	1.61765	8.72735	FALSE	FALSE
Solvent	d3-N-MeFOSAA	573.993	100	0.174218	3	3.43136e+08	1.96958e+09	2.25662	86.7577	96.5246	107.441	0.965246	1.03601	1.2384	FALSE	FALSE	8.92877e+09	7.12819e+09	1.94447e+09	22.0588	27.6309	101.291	0.276309	3.61914	4.59187	FALSE	FALSE	7.66434e+09	4.1196e+09	1.16364e+09	25.698	47.81	169.26	0.4781	2.09161	6.58651	FALSE	FALSE	9.9863	9.5155	9.04542	20.3269	60.0992	177.4	0.600992	1.66391	8.72735	FALSE	FALSE
Solvent	d3-N-MeFOSAA	573.993	250	0.435545	1	9.63258e+08	2.21162e+09	2.25662	246.052	272.994	303.086	1.09198	1.09198	1.2318	FALSE	FALSE	8.92877e+09	7.12819e+09	1.94447e+09	61.9239	77.5658	284.346	0.310263	3.22307	4.59187	FALSE	FALSE	7.66434e+09	4.1196e+09	1.16364e+09	72.1398	134.213	475.15	0.536852	1.86271	6.58651	FALSE	FALSE	9.9863	9.5155	9.04542	57.0619	168.712	497.999	0.674846	1.48182	8.72735	FALSE	FALSE
Solvent	d3-N-MeFOSAA	573.993	250	0.435545	2	9.6187e+08	2.20843e+09	2.25662	245.578	272.543	302.669	1.09017	1.09017	1.23248	FALSE	FALSE	8.92877e+09	7.12819e+09	1.94447e+09	61.8346	77.454	283.937	0.309816	3.22772	4.59187	FALSE	FALSE	7.66434e+09	4.1196e+09	1.16364e+09	72.0359	134.02	474.465	0.536078	1.8654	6.58651	FALSE	FALSE	9.9863	9.5155	9.04542	56.9797	168.468	497.281	0.673874	1.48396	8.72735	FALSE	FALSE
Solvent	d3-N-MeFOSAA	573.993	250	0.435545	3	9.69582e+08	2.22613e+09	2.25662	248.233	275.051	304.963	1.1002	1.1002	1.22854	FALSE	FALSE	8.92877e+09	7.12819e+09	1.94447e+09	62.3304	78.075	286.213	0.3123	3.20205	4.59187	FALSE	FALSE	7.66434e+09	4.1196e+09	1.16364e+09	72.6134	135.094	478.269	0.540376	1.85056	6.58651	FALSE	FALSE	9.9863	9.5155	9.04542	57.4365	169.819	501.268	0.679277	1.47215	8.72735	FALSE	FALSE
Solvent	MPFDoA	615.968	0.5	0.000811731	1	3.67271e+06	4.52454e+09	2.22012	0.43623	0.479215	0.526132	0.95843	1.04337	1.20609	FALSE	FALSE	4.79448e+09	4.41865e+09	3.97104e+09	0.471849	0.511982	0.569692	1.02396	1.02396	1.20736	FALSE	FALSE	7.65489e+09	3.99841e+09	1.16422e+09	0.295533	0.565792	1.94316	1.13158	1.13158	6.57511	FALSE	FALSE	9.96081	9.48409	9.00734	0.247589	0.742085	2.22437	1.48417	1.48417	8.98412	FALSE	FALSE
Solvent	MPFDoA	615.968	0.5	0.000811731	2	3.74317e+06	4.61134e+09	2.22012	0.44561	0.49021	0.538955	0.98042	1.01997	1.20947	FALSE	FALSE	4.79448e+09	4.41865e+09	3.97104e+09	0.480901	0.521804	0.580621	1.04361	1.04361	1.20736	FALSE	FALSE	7.65489e+09	3.99841e+09	1.16422e+09	0.301202	0.576647	1.98044	1.15329	1.15329	6.57511	FALSE	FALSE	9.96081	9.48409	9.00734	0.252339	0.756322	2.26704	1.51264	1.51264	8.98412	FALSE	FALSE
Solvent	MPFDoA	615.968	0.5	0.000811731	3	3.66385e+06	4.51363e+09	2.22012	0.435088	0.477834	0.52448	0.955669	1.04639	1.20546	FALSE	FALSE	4.79448e+09	4.41865e+09	3.97104e+09	0.470711	0.510748	0.568318	1.0215	1.0215	1.20736	FALSE	FALSE	7.65489e+09	3.99841e+09	1.16422e+09	0.29482	0.564428	1.93847	1.12886	1.12886	6.57511	FALSE	FALSE	9.96081	9.48409	9.00734	0.246992	0.740296	2.219	1.48059	1.48059	8.98412	FALSE	FALSE
Solvent	MPFDoA	615.968	1	0.00162346	1	7.51461e+06	4.62875e+09	2.22012	0.908569	0.997561	1.09478	0.997561	1.00245	1.20495	FALSE	FALSE	4.79448e+09	4.41865e+09	3.97104e+09	0.965435	1.04755	1.16563	1.04755	1.04755	1.20736	FALSE	FALSE	7.65489e+09	3.99841e+09	1.16422e+09	0.60468	1.15765	3.97584	1.15765	1.15765	6.57511	FALSE	FALSE	9.96081	9.48409	9.00734	0.506583	1.51836	4.5512	1.51836	1.51836	8.98412	FALSE	FALSE
Solvent	MPFDoA	615.968	1	0.00162346	2	7.45384e+06	4.59132e+09	2.22012	0.900302	0.988385	1.0846	0.988385	1.01175	1.20471	FALSE	FALSE	4.79448e+09	4.41865e+09	3.97104e+09	0.957627	1.03908	1.1562	1.03908	1.03908	1.20736	FALSE	FALSE	7.65489e+09	3.99841e+09	1.16422e+09	0.599789	1.14829	3.94368	1.14829	1.14829	6.57511	FALSE	FALSE	9.96081	9.48409	9.00734	0.502486	1.50608	4.5144	1.50608	1.50608	8.98412	FALSE	FALSE
Solvent	MPFDoA	615.968	1	0.00162346	3	7.47279e+06	4.603e+09	2.22012	0.902861	0.991246	1.0878	0.991246	1.00883	1.20484	FALSE	FALSE	4.79448e+09	4.41865e+09	3.97104e+09	0.960062	1.04172	1.15914	1.04172	1.04172	1.20736	FALSE	FALSE	7.65489e+09	3.99841e+09	1.16422e+09	0.601315	1.15121	3.95371	1.15121	1.15121	6.57511	FALSE	FALSE	9.96081	9.48409	9.00734	0.503764	1.50991	4.52588	1.50991	1.50991	8.98412	FALSE	FALSE
Solvent	MPFDoA	615.968	5	0.00811731	1	3.77791e+07	4.65414e+09	2.22012	4.71198	5.15256	5.6335	1.03051	1.03051	1.19557	FALSE	FALSE	4.79448e+09	4.41865e+09	3.97104e+09	4.85365	5.26648	5.8601	1.0533	1.0533	1.20736	FALSE	FALSE	7.65489e+09	3.99841e+09	1.16422e+09	3.03998	5.81999	19.9882	1.164	1.164	6.57511	FALSE	FALSE	9.96081	9.48409	9.00734	2.54681	7.63342	22.8808	1.52668	1.52668	8.98412	FALSE	FALSE
Solvent	MPFDoA	615.968	5	0.00811731	2	3.81659e+07	4.70179e+09	2.22012	4.76795	5.20898	5.69	1.0418	1.0418	1.19339	FALSE	FALSE	4.79448e+09	4.41865e+09	3.97104e+09	4.90334	5.3204	5.9201	1.06408	1.06408	1.20736	FALSE	FALSE	7.65489e+09	3.99841e+09	1.16422e+09	3.0711	5.87958	20.1929	1.17592	1.17592	6.57511	FALSE	FALSE	9.96081	9.48409	9.00734	2.57288	7.71157	23.1151	1.54231	1.54231	8.98412	FALSE	FALSE
Solvent	MPFDoA	615.968	5	0.00811731	3	3.85411e+07	4.74802e+09	2.22012	4.82363	5.26374	5.74323	1.05275	1.05275	1.19065	FALSE	FALSE	4.79448e+09	4.41865e+09	3.97104e+09	4.95155	5.37271	5.97831	1.07454	1.07454	1.20736	FALSE	FALSE	7.65489e+09	3.99841e+09	1.16422e+09	3.1013	5.93738	20.3914	1.18748	1.18748	6.57511	FALSE	FALSE	9.96081	9.48409	9.00734	2.59818	7.78739	23.3423	1.55748	1.55748	8.98412	FALSE	FALSE
Solvent	MPFDoA	615.968	10	0.0162346	1	7.17254e+07	4.41805e+09	2.22012	9.01321	9.86008	10.786	0.986008	1.01419	1.19669	FALSE	FALSE	4.79448e+09	4.41865e+09	3.97104e+09	9.21488	9.99865	11.1257	0.999865	1.00013	1.20736	FALSE	FALSE	7.65489e+09	3.99841e+09	1.16422e+09	5.77154	11.0495	37.9486	1.10495	1.10495	6.57511	FALSE	FALSE	9.96081	9.48409	9.00734	4.83523	14.4924	43.4403	1.44924	1.44924	8.98412	FALSE	FALSE
Solvent	MPFDoA	615.968	10	0.0162346	2	7.46536e+07	4.59842e+09	2.22012	9.41068	10.2875	11.2456	1.02875	1.02875	1.19498	FALSE	FALSE	4.79448e+09	4.41865e+09	3.97104e+09	9.59108	10.4069	11.5799	1.04069	1.04069	1.20736	FALSE	FALSE	7.65489e+09	3.99841e+09	1.16422e+09	6.00717	11.5006	39.4978	1.15006	1.15006	6.57511	FALSE	FALSE	9.96081	9.48409	9.00734	5.03263	15.0841	45.2138	1.50841	1.50841	8.98412	FALSE	FALSE
Solvent	MPFDoA	615.968	10	0.0162346	3	7.50946e+07	4.62559e+09	2.22012	9.47399	10.3519	11.3109	1.03519	1.03519	1.19389	FALSE	FALSE	4.79448e+09	4.41865e+09	3.97104e+09	9.64774	10.4683	11.6483	1.04683	1.04683	1.20736	FALSE	FALSE	7.65489e+09	3.99841e+09	1.16422e+09	6.04266	11.5686	39.7311	1.15686	1.15686	6.57511	FALSE	FALSE	9.96081	9.48409	9.00734	5.06236	15.1732	45.4809	1.51732	1.51732	8.98412	FALSE	FALSE
Solvent	MPFDoA	615.968	25	0.0405866	1	1.87042e+08	4.60846e+09	2.22012	23.9732	26.1719	28.5752	1.04687	1.04687	1.19197	FALSE	FALSE	4.79448e+09	4.41865e+09	3.97104e+09	24.0301	26.0739	29.0129	1.04296	1.04296	1.20736	FALSE	FALSE	7.65489e+09	3.99841e+09	1.16422e+09	15.0507	28.8143	98.9602	1.15257	1.15257	6.57511	FALSE	FALSE	9.96081	9.48409	9.00734	12.6091	37.7925	113.281	1.5117	1.5117	8.98412	FALSE	FALSE
Solvent	MPFDoA	615.968	25	0.0405866	2	1.86012e+08	4.58308e+09	2.22012	23.8187	26.0184	28.4242	1.04073	1.04073	1.19336	FALSE	FALSE	4.79448e+09	4.41865e+09	3.97104e+09	23.8977	25.9303	28.8532	1.03721	1.03721	1.20736	FALSE	FALSE	7.65489e+09	3.99841e+09	1.16422e+09	14.9678	28.6557	98.4152	1.14623	1.14623	6.57511	FALSE	FALSE	9.96081	9.48409	9.00734	12.5396	37.5844	112.657	1.50337	1.50337	8.98412	FALSE	FALSE
Solvent	MPFDoA	615.968	25	0.0405866	3	1.86123e+08	4.58583e+09	2.22012	23.8354	26.035	28.4407	1.0414	1.0414	1.19321	FALSE	FALSE	4.79448e+09	4.41865e+09	3.97104e+09	23.912	25.9459	28.8704	1.03784	1.03784	1.20736	FALSE	FALSE	7.65489e+09	3.99841e+09	1.16422e+09	14.9768	28.6728	98.4742	1.14691	1.14691	6.57511	FALSE	FALSE	9.96081	9.48409	9.00734	12.5471	37.6069	112.725	1.50428	1.50428	8.98412	FALSE	FALSE
Solvent	MPFDoA	615.968	50	0.0811731	1	3.54332e+08	4.36514e+09	2.22012	45.6358	49.97	54.7279	0.999399	1.0006	1.19923	FALSE	FALSE	4.79448e+09	4.41865e+09	3.97104e+09	45.5226	49.3946	54.9622	0.987891	1.01226	1.20736	FALSE	FALSE	7.65489e+09	3.99841e+09	1.16422e+09	28.5121	54.586	187.471	1.09172	1.09172	6.57511	FALSE	FALSE	9.96081	9.48409	9.00734	23.8866	71.5942	214.6	1.43188	1.43188	8.98412	FALSE	FALSE
Solvent	MPFDoA	615.968	50	0.0811731	2	3.54193e+08	4.36342e+09	2.22012	45.6165	49.9487	54.7045	0.998974	1.00103	1.19923	FALSE	FALSE	4.79448e+09	4.41865e+09	3.97104e+09	45.5047	49.3751	54.9406	0.987502	1.01266	1.20736	FALSE	FALSE	7.65489e+09	3.99841e+09	1.16422e+09	28.5009	54.5645	187.397	1.09129	1.09129	6.57511	FALSE	FALSE	9.96081	9.48409	9.00734	23.8772	71.566	214.516	1.43132	1.43132	8.98412	FALSE	FALSE
Solvent	MPFDoA	615.968	50	0.0811731	3	3.51568e+08	4.33109e+09	2.22012	45.2565	49.549	54.2607	0.99098	1.0091	1.19896	FALSE	FALSE	4.79448e+09	4.41865e+09	3.97104e+09	45.1675	49.0093	54.5335	0.980185	1.02022	1.20736	FALSE	FALSE	7.65489e+09	3.99841e+09	1.16422e+09	28.2897	54.1602	186.008	1.0832	1.0832	6.57511	FALSE	FALSE	9.96081	9.48409	9.00734	23.7003	71.0358	212.926	1.42072	1.42072	8.98412	FALSE	FALSE
Solvent	MPFDoA	615.968	100	0.162346	1	6.11399e+08	3.76602e+09	2.22012	80.884	85.9054	91.2513	0.859054	1.16407	1.12818	FALSE	TRUE	4.79448e+09	4.41865e+09	3.97104e+09	78.5491	85.2301	94.8371	0.852301	1.17329	1.20736	FALSE	TRUE	7.65489e+09	3.99841e+09	1.16422e+09	49.1976	94.1879	323.48	0.941879	1.06171	6.57511	FALSE	FALSE	9.96081	9.48409	9.00734	41.2163	123.536	370.292	1.23536	1.23536	8.98412	FALSE	FALSE
Solvent	MPFDoA	615.968	100	0.162346	2	6.86842e+08	4.23072e+09	2.22012	89.1749	97.6831	107.039	0.976831	1.02372	1.20033	FALSE	FALSE	4.79448e+09	4.41865e+09	3.97104e+09	88.2416	95.747	106.539	0.95747	1.04442	1.20736	FALSE	FALSE	7.65489e+09	3.99841e+09	1.16422e+09	55.2683	105.81	363.395	1.0581	1.0581	6.57511	FALSE	FALSE	9.96081	9.48409	9.00734	46.3022	138.779	415.984	1.38779	1.38779	8.98412	FALSE	FALSE
Solvent	MPFDoA	615.968	100	0.162346	3	6.74395e+08	4.15406e+09	2.22012	87.5293	95.726	104.724	0.95726	1.04465	1.19645	FALSE	FALSE	4.79448e+09	4.41865e+09	3.97104e+09	86.6425	94.0119	104.609	0.940119	1.06369	1.20736	FALSE	FALSE	7.65489e+09	3.99841e+09	1.16422e+09	54.2667	103.893	356.81	1.03893	1.03893	6.57511	FALSE	FALSE	9.96081	9.48409	9.00734	45.4631	136.264	408.446	1.36264	1.36264	8.98412	FALSE	FALSE
Solvent	MPFDoA	615.968	250	0.405866	1	1.78606e+09	4.40063e+09	2.22012	236.613	259.617	285.005	1.03847	1.03847	1.20452	FALSE	FALSE	4.79448e+09	4.41865e+09	3.97104e+09	229.464	248.981	277.045	0.995923	1.00409	1.20736	FALSE	FALSE	7.65489e+09	3.99841e+09	1.16422e+09	143.72	275.149	944.973	1.1006	1.1006	6.57511	FALSE	FALSE	9.96081	9.48409	9.00734	120.404	360.881	1081.73	1.44353	1.44353	8.98412	FALSE	FALSE
Solvent	MPFDoA	615.968	250	0.405866	2	1.7459e+09	4.30168e+09	2.22012	230.114	252.809	277.89	1.01124	1.01124	1.20762	FALSE	FALSE	4.79448e+09	4.41865e+09	3.97104e+09	224.304	243.382	270.816	0.973528	1.02719	1.20736	FALSE	FALSE	7.65489e+09	3.99841e+09	1.16422e+09	140.488	268.962	923.724	1.07585	1.07585	6.57511	FALSE	FALSE	9.96081	9.48409	9.00734	117.697	352.767	1057.4	1.41107	1.41107	8.98412	FALSE	FALSE
Solvent	MPFDoA	615.968	250	0.405866	3	1.72465e+09	4.24933e+09	2.22012	226.839	249.223	273.96	0.996891	1.00312	1.20773	FALSE	FALSE	4.79448e+09	4.41865e+09	3.97104e+09	221.574	240.42	267.52	0.96168	1.03985	1.20736	FALSE	FALSE	7.65489e+09	3.99841e+09	1.16422e+09	138.778	265.688	912.482	1.06275	1.06275	6.57511	FALSE	FALSE	9.96081	9.48409	9.00734	116.264	348.473	1044.53	1.39389	1.39389	8.98412	FALSE	FALSE
Solvent	d5-N-EtFOSAA	590.022	0.5	0.000847427	1	1.73417e+06	2.04639e+09	2.2061	0.456386	0.516656	0.58431	1.03331	1.03331	1.2803	FALSE	FALSE	8.92877e+09	7.12819e+09	1.94142e+09	0.114595	0.143542	0.527036	0.287084	3.4833	4.5991	FALSE	FALSE	7.64381e+09	4.1184e+09	1.16185e+09	0.133859	0.248445	0.880663	0.496889	2.01252	6.57901	FALSE	FALSE	9.96122	9.49164	9.02255	0.111877	0.329851	0.971424	0.659701	1.51584	8.68298	FALSE	FALSE
Solvent	d5-N-EtFOSAA	590.022	0.5	0.000847427	2	1.82971e+06	2.15913e+09	2.2061	0.489277	0.549827	0.617339	1.09965	1.09965	1.26174	FALSE	FALSE	8.92877e+09	7.12819e+09	1.94142e+09	0.120909	0.15145	0.556072	0.3029	3.30141	4.5991	FALSE	FALSE	7.64381e+09	4.1184e+09	1.16185e+09	0.141234	0.262132	0.929181	0.524264	1.90743	6.57901	FALSE	FALSE	9.96122	9.49164	9.02255	0.11804	0.348023	1.02494	0.696046	1.43669	8.68298	FALSE	FALSE
Solvent	d5-N-EtFOSAA	590.022	0.5	0.000847427	3	1.81525e+06	2.14208e+09	2.2061	0.484058	0.544799	0.612621	1.0896	1.0896	1.2656	FALSE	FALSE	8.92877e+09	7.12819e+09	1.94142e+09	0.119954	0.150254	0.55168	0.300508	3.3277	4.5991	FALSE	FALSE	7.64381e+09	4.1184e+09	1.16185e+09	0.140119	0.260062	0.921841	0.520123	1.92262	6.57901	FALSE	FALSE	9.96122	9.49164	9.02255	0.117108	0.345274	1.01685	0.690548	1.44813	8.68298	FALSE	FALSE
Solvent	d5-N-EtFOSAA	590.022	1	0.00169485	1	3.31127e+06	1.95372e+09	2.2061	0.86303	0.974861	1.10034	0.974861	1.02579	1.27498	FALSE	FALSE	8.92877e+09	7.12819e+09	1.94142e+09	0.218812	0.274084	1.00634	0.274084	3.64852	4.5991	FALSE	FALSE	7.64381e+09	4.1184e+09	1.16185e+09	0.255595	0.474388	1.68156	0.474388	2.10798	6.57901	FALSE	FALSE	9.96122	9.49164	9.02255	0.213621	0.629827	1.85487	0.629827	1.58774	8.68298	FALSE	FALSE
Solvent	d5-N-EtFOSAA	590.022	1	0.00169485	2	3.24559e+06	1.91497e+09	2.2061	0.845036	0.953331	1.0747	0.953331	1.04895	1.27178	FALSE	FALSE	8.92877e+09	7.12819e+09	1.94142e+09	0.214472	0.268647	0.986377	0.268647	3.72236	4.5991	FALSE	TRUE	7.64381e+09	4.1184e+09	1.16185e+09	0.250525	0.464978	1.64821	0.464978	2.15064	6.57901	FALSE	FALSE	9.96122	9.49164	9.02255	0.209383	0.617333	1.81807	0.617333	1.61987	8.68298	FALSE	FALSE
Solvent	d5-N-EtFOSAA	590.022	1	0.00169485	3	3.32412e+06	1.9613e+09	2.2061	0.866636	0.979074	1.10526	0.979074	1.02137	1.27534	FALSE	FALSE	8.92877e+09	7.12819e+09	1.94142e+09	0.219661	0.275147	1.01024	0.275147	3.63442	4.5991	FALSE	FALSE	7.64381e+09	4.1184e+09	1.16185e+09	0.256587	0.476228	1.68809	0.476228	2.09983	6.57901	FALSE	FALSE	9.96122	9.49164	9.02255	0.214449	0.63227	1.86206	0.63227	1.5816	8.68298	FALSE	FALSE
Solvent	d5-N-EtFOSAA	590.022	5	0.00847427	1	1.64777e+07	1.94444e+09	2.2061	4.27235	4.8025	5.39698	0.9605	1.04112	1.26324	FALSE	FALSE	8.92877e+09	7.12819e+09	1.94142e+09	1.08886	1.36391	5.00779	0.272782	3.66594	4.5991	FALSE	FALSE	7.64381e+09	4.1184e+09	1.16185e+09	1.27191	2.36067	8.36788	0.472134	2.11804	6.57901	FALSE	FALSE	9.96122	9.49164	9.02255	1.06303	3.13417	9.23027	0.626835	1.59532	8.68298	FALSE	FALSE
Solvent	d5-N-EtFOSAA	590.022	5	0.00847427	2	1.72191e+07	2.03193e+09	2.2061	4.46801	5.02891	5.65874	1.00578	1.00578	1.2665	FALSE	FALSE	8.92877e+09	7.12819e+09	1.94142e+09	1.13786	1.42528	5.23312	0.285056	3.50809	4.5991	FALSE	FALSE	7.64381e+09	4.1184e+09	1.16185e+09	1.32914	2.46689	8.7444	0.493378	2.02684	6.57901	FALSE	FALSE	9.96122	9.49164	9.02255	1.11086	3.2752	9.64559	0.65504	1.52663	8.68298	FALSE	FALSE
Solvent	d5-N-EtFOSAA	590.022	5	0.00847427	3	1.71773e+07	2.02699e+09	2.2061	4.45653	5.01612	5.64448	1.00322	1.00322	1.26657	FALSE	FALSE	8.92877e+09	7.12819e+09	1.94142e+09	1.13509	1.42181	5.22039	0.284362	3.51664	4.5991	FALSE	FALSE	7.64381e+09	4.1184e+09	1.16185e+09	1.3259	2.46089	8.72313	0.492178	2.03178	6.57901	FALSE	FALSE	9.96122	9.49164	9.02255	1.10816	3.26723	9.62214	0.653447	1.53035	8.68298	FALSE	FALSE
Solvent	d5-N-EtFOSAA	590.022	10	0.0169485	1	3.24831e+07	1.91657e+09	2.2061	8.40017	9.4198	10.5623	0.94198	1.06159	1.25739	FALSE	FALSE	8.92877e+09	7.12819e+09	1.94142e+09	2.14651	2.68872	9.87204	0.268872	3.71924	4.5991	FALSE	TRUE	7.64381e+09	4.1184e+09	1.16185e+09	2.50735	4.65368	16.4959	0.465368	2.14884	6.57901	FALSE	FALSE	9.96122	9.49164	9.02255	2.09559	6.17851	18.196	0.617851	1.61851	8.68298	FALSE	FALSE
Solvent	d5-N-EtFOSAA	590.022	10	0.0169485	2	3.36333e+07	1.98444e+09	2.2061	8.68588	9.76606	10.9797	0.976606	1.02395	1.26409	FALSE	FALSE	8.92877e+09	7.12819e+09	1.94142e+09	2.22252	2.78393	10.2216	0.278393	3.59204	4.5991	FALSE	FALSE	7.64381e+09	4.1184e+09	1.16185e+09	2.59614	4.81846	17.08	0.481846	2.07535	6.57901	FALSE	FALSE	9.96122	9.49164	9.02255	2.16979	6.39729	18.8403	0.639729	1.56316	8.68298	FALSE	FALSE
Solvent	d5-N-EtFOSAA	590.022	10	0.0169485	3	3.35001e+07	1.97658e+09	2.2061	8.65179	9.72594	10.9326	0.972594	1.02818	1.26363	FALSE	FALSE	8.92877e+09	7.12819e+09	1.94142e+09	2.21372	2.7729	10.1811	0.27729	3.60633	4.5991	FALSE	FALSE	7.64381e+09	4.1184e+09	1.16185e+09	2.58586	4.79938	17.0124	0.479938	2.0836	6.57901	FALSE	FALSE	9.96122	9.49164	9.02255	2.1612	6.37196	18.7657	0.637196	1.56938	8.68298	FALSE	FALSE
Solvent	d5-N-EtFOSAA	590.022	25	0.0423713	1	8.72057e+07	2.05813e+09	2.2061	22.3961	25.1947	28.3483	1.00779	1.00779	1.26577	FALSE	FALSE	8.92877e+09	7.12819e+09	1.94142e+09	5.76263	7.21827	26.5029	0.288731	3.46343	4.5991	FALSE	FALSE	7.64381e+09	4.1184e+09	1.16185e+09	6.73136	12.4935	44.2857	0.499739	2.00104	6.57901	FALSE	FALSE	9.96122	9.49164	9.02255	5.62592	16.5871	48.8498	0.663485	1.50719	8.68298	FALSE	FALSE
Solvent	d5-N-EtFOSAA	590.022	25	0.0423713	2	8.68686e+07	2.05017e+09	2.2061	22.3052	25.0933	28.2352	1.00373	1.00373	1.26586	FALSE	FALSE	8.92877e+09	7.12819e+09	1.94142e+09	5.74036	7.19037	26.4005	0.287615	3.47687	4.5991	FALSE	FALSE	7.64381e+09	4.1184e+09	1.16185e+09	6.70535	12.4452	44.1145	0.497808	2.00881	6.57901	FALSE	FALSE	9.96122	9.49164	9.02255	5.60418	16.523	48.661	0.660921	1.51304	8.68298	FALSE	FALSE
Solvent	d5-N-EtFOSAA	590.022	25	0.0423713	3	8.73718e+07	2.06205e+09	2.2061	22.4411	25.2447	28.4037	1.00979	1.00979	1.2657	FALSE	FALSE	8.92877e+09	7.12819e+09	1.94142e+09	5.77361	7.23202	26.5534	0.289281	3.45685	4.5991	FALSE	FALSE	7.64381e+09	4.1184e+09	1.16185e+09	6.74418	12.5173	44.37	0.500691	1.99724	6.57901	FALSE	FALSE	9.96122	9.49164	9.02255	5.63663	16.6187	48.9428	0.664749	1.50433	8.68298	FALSE	FALSE
Solvent	d5-N-EtFOSAA	590.022	50	0.0847427	1	1.71321e+08	2.02166e+09	2.2061	43.7183	49.2082	55.4082	0.984163	1.01609	1.26739	FALSE	FALSE	8.92877e+09	7.12819e+09	1.94142e+09	11.321	14.1807	52.0666	0.283614	3.52592	4.5991	FALSE	FALSE	7.64381e+09	4.1184e+09	1.16185e+09	13.2241	24.5442	87.0018	0.490883	2.03714	6.57901	FALSE	FALSE	9.96122	9.49164	9.02255	11.0524	32.5864	95.9682	0.651727	1.53438	8.68298	FALSE	FALSE
Solvent	d5-N-EtFOSAA	590.022	50	0.0847427	2	1.70836e+08	2.01593e+09	2.2061	43.592	49.0611	55.237	0.981221	1.01914	1.26714	FALSE	FALSE	8.92877e+09	7.12819e+09	1.94142e+09	11.289	14.1406	51.9192	0.282811	3.53592	4.5991	FALSE	FALSE	7.64381e+09	4.1184e+09	1.16185e+09	13.1867	24.4747	86.7556	0.489494	2.04293	6.57901	FALSE	FALSE	9.96122	9.49164	9.02255	11.0212	32.4941	95.6966	0.649883	1.53874	8.68298	FALSE	FALSE
Solvent	d5-N-EtFOSAA	590.022	50	0.0847427	3	1.69534e+08	2.00057e+09	2.2061	43.2563	48.6663	54.7732	0.973326	1.0274	1.26625	FALSE	FALSE	8.92877e+09	7.12819e+09	1.94142e+09	11.2029	14.0328	51.5235	0.280656	3.56308	4.5991	FALSE	FALSE	7.64381e+09	4.1184e+09	1.16185e+09	13.0862	24.2882	86.0944	0.485763	2.05862	6.57901	FALSE	FALSE	9.96122	9.49164	9.02255	10.9372	32.2465	94.9672	0.64493	1.55056	8.68298	FALSE	FALSE
Solvent	d5-N-EtFOSAA	590.022	100	0.169485	1	3.05039e+08	1.79979e+09	2.2061	78.1805	86.3297	95.3645	0.863297	1.15835	1.2198	FALSE	TRUE	8.92877e+09	7.12819e+09	1.94142e+09	20.1573	25.249	92.7053	0.25249	3.96056	4.5991	FALSE	TRUE	7.64381e+09	4.1184e+09	1.16185e+09	23.5458	43.7013	154.908	0.437013	2.28826	6.57901	FALSE	FALSE	9.96122	9.49164	9.02255	19.679	58.0205	170.873	0.580205	1.72353	8.68298	FALSE	FALSE
Solvent	d5-N-EtFOSAA	590.022	100	0.169485	2	3.48408e+08	2.05568e+09	2.2061	88.3989	99.6642	112.432	0.996642	1.00337	1.27187	FALSE	FALSE	8.92877e+09	7.12819e+09	1.94142e+09	23.0231	28.8387	105.886	0.288387	3.46756	4.5991	FALSE	FALSE	7.64381e+09	4.1184e+09	1.16185e+09	26.8934	49.9145	176.932	0.499145	2.00343	6.57901	FALSE	FALSE	9.96122	9.49164	9.02255	22.4769	66.2695	195.167	0.662695	1.50899	8.68298	FALSE	FALSE
Solvent	d5-N-EtFOSAA	590.022	100	0.169485	3	3.35672e+08	1.98054e+09	2.2061	85.06	95.7255	107.789	0.957255	1.04465	1.26721	FALSE	FALSE	8.92877e+09	7.12819e+09	1.94142e+09	22.1815	27.7845	102.015	0.277845	3.59913	4.5991	FALSE	FALSE	7.64381e+09	4.1184e+09	1.16185e+09	25.9103	48.0899	170.464	0.480899	2.07944	6.57901	FALSE	FALSE	9.96122	9.49164	9.02255	21.6553	63.8471	188.032	0.638471	1.56624	8.68298	FALSE	FALSE
Solvent	d5-N-EtFOSAA	590.022	250	0.423713	1	9.64445e+08	2.27617e+09	2.2061	247.997	277.95	311.769	1.1118	1.1118	1.25715	FALSE	FALSE	8.92877e+09	7.12819e+09	1.94142e+09	63.7314	79.8299	293.107	0.31932	3.13166	4.5991	FALSE	FALSE	7.64381e+09	4.1184e+09	1.16185e+09	74.445	138.171	489.774	0.552683	1.80936	6.57901	FALSE	FALSE	9.96122	9.49164	9.02255	62.2194	183.444	540.25	0.733776	1.36281	8.68298	FALSE	FALSE
Solvent	d5-N-EtFOSAA	590.022	250	0.423713	2	9.47834e+08	2.23697e+09	2.2061	242.314	272.464	306.623	1.08986	1.08986	1.26539	FALSE	FALSE	8.92877e+09	7.12819e+09	1.94142e+09	62.6338	78.455	288.059	0.31382	3.18654	4.5991	FALSE	FALSE	7.64381e+09	4.1184e+09	1.16185e+09	73.1628	135.791	481.339	0.543164	1.84106	6.57901	FALSE	FALSE	9.96122	9.49164	9.02255	61.1478	180.285	530.945	0.721138	1.3867	8.68298	FALSE	FALSE
Solvent	d5-N-EtFOSAA	590.022	250	0.423713	3	9.60081e+08	2.26587e+09	2.2061	246.481	276.507	310.442	1.10603	1.10603	1.25949	FALSE	FALSE	8.92877e+09	7.12819e+09	1.94142e+09	63.4431	79.4687	291.781	0.317875	3.14589	4.5991	FALSE	FALSE	7.64381e+09	4.1184e+09	1.16185e+09	74.1082	137.546	487.558	0.550182	1.81758	6.57901	FALSE	FALSE	9.96122	9.49164	9.02255	61.9379	182.614	537.806	0.730456	1.36901	8.68298	FALSE	FALSE
Solvent	M8FOSA	506.98	0.5	0.000986232	1	6.99453e+06	7.09217e+09	2.6443	0.458391	0.497736	0.540221	0.995472	1.00455	1.17852	FALSE	FALSE	8.92877e+09	2.05568e+09	1.88943e+09	0.397153	1.72502	1.8768	3.45004	3.45004	4.72564	FALSE	FALSE	7.12927e+09	3.99568e+09	1.16119e+09	0.497399	0.887479	3.05383	1.77496	1.77496	6.1396	FALSE	FALSE	10.1393	9.66717	9.19807	0.257279	0.763099	2.2474	1.5262	1.5262	8.73526	FALSE	FALSE
Solvent	M8FOSA	506.98	0.5	0.000986232	2	7.13718e+06	7.23682e+09	2.6443	0.469514	0.509532	0.552723	1.01906	1.01906	1.17722	FALSE	FALSE	8.92877e+09	2.05568e+09	1.88943e+09	0.405253	1.7602	1.91508	3.5204	3.5204	4.72564	FALSE	FALSE	7.12927e+09	3.99568e+09	1.16119e+09	0.507543	0.90558	3.11611	1.81116	1.81116	6.1396	TRUE	FALSE	10.1393	9.66717	9.19807	0.262526	0.778663	2.29323	1.55733	1.55733	8.73526	FALSE	FALSE
Solvent	M8FOSA	506.98	0.5	0.000986232	3	7.15134e+06	7.25117e+09	2.6443	0.470654	0.510704	0.553924	1.02141	1.02141	1.17692	FALSE	FALSE	8.92877e+09	2.05568e+09	1.88943e+09	0.406057	1.76369	1.91888	3.52739	3.52739	4.72564	FALSE	FALSE	7.12927e+09	3.99568e+09	1.16119e+09	0.50855	0.907376	3.12229	1.81475	1.81475	6.1396	TRUE	FALSE	10.1393	9.66717	9.19807	0.263047	0.780207	2.29778	1.56041	1.56041	8.73526	FALSE	FALSE
Solvent	M8FOSA	506.98	1	0.00197246	1	1.40898e+07	7.14325e+09	2.6443	0.918532	0.995443	1.07844	0.995443	1.00458	1.17409	FALSE	FALSE	8.92877e+09	2.05568e+09	1.88943e+09	0.800027	3.47489	3.78064	3.47489	3.47489	4.72564	FALSE	FALSE	7.12927e+09	3.99568e+09	1.16119e+09	1.00196	1.78774	6.15164	1.78774	1.78774	6.1396	TRUE	FALSE	10.1393	9.66717	9.19807	0.518263	1.53719	4.52717	1.53719	1.53719	8.73526	FALSE	FALSE
Solvent	M8FOSA	506.98	1	0.00197246	2	1.40601e+07	7.12819e+09	2.6443	0.916409	0.993117	1.07589	0.993117	1.00693	1.17403	FALSE	FALSE	8.92877e+09	2.05568e+09	1.88943e+09	0.79834	3.46756	3.77267	3.46756	3.46756	4.72564	FALSE	FALSE	7.12927e+09	3.99568e+09	1.16119e+09	0.999849	1.78397	6.13867	1.78397	1.78397	6.1396	FALSE	FALSE	10.1393	9.66717	9.19807	0.517171	1.53395	4.51762	1.53395	1.53395	8.73526	FALSE	FALSE
Solvent	M8FOSA	506.98	1	0.00197246	3	1.39285e+07	7.06145e+09	2.6443	0.907155	0.98281	1.06443	0.98281	1.01749	1.17337	FALSE	FALSE	8.92877e+09	2.05568e+09	1.88943e+09	0.790865	3.43509	3.73734	3.43509	3.43509	4.72564	FALSE	FALSE	7.12927e+09	3.99568e+09	1.16119e+09	0.990488	1.76727	6.0812	1.76727	1.76727	6.1396	FALSE	FALSE	10.1393	9.66717	9.19807	0.512328	1.51959	4.47532	1.51959	1.51959	8.73526	FALSE	FALSE
Solvent	M8FOSA	506.98	5	0.00986232	1	7.21649e+07	7.31724e+09	2.6443	4.6389	5.01457	5.42004	1.00291	1.00291	1.16839	FALSE	FALSE	8.92877e+09	2.05568e+09	1.88943e+09	4.09756	17.7976	19.3636	3.55952	3.55952	4.72564	FALSE	FALSE	7.12927e+09	3.99568e+09	1.16119e+09	5.13183	9.15643	31.5074	1.83129	1.83129	6.1396	TRUE	FALSE	10.1393	9.66717	9.19807	2.65443	7.87315	23.1872	1.57463	1.57463	8.73526	FALSE	FALSE
Solvent	M8FOSA	506.98	5	0.00986232	2	7.22586e+07	7.32674e+09	2.6443	4.64524	5.02135	5.42729	1.00427	1.00427	1.16835	FALSE	FALSE	8.92877e+09	2.05568e+09	1.88943e+09	4.10288	17.8207	19.3887	3.56414	3.56414	4.72564	FALSE	FALSE	7.12927e+09	3.99568e+09	1.16119e+09	5.13849	9.16831	31.5483	1.83366	1.83366	6.1396	TRUE	FALSE	10.1393	9.66717	9.19807	2.65788	7.88337	23.2173	1.57667	1.57667	8.73526	FALSE	FALSE
Solvent	M8FOSA	506.98	5	0.00986232	3	7.31914e+07	7.42132e+09	2.6443	4.70967	5.08892	5.49808	1.01778	1.01778	1.1674	FALSE	FALSE	8.92877e+09	2.05568e+09	1.88943e+09	4.15585	18.0508	19.639	3.61015	3.61015	4.72564	FALSE	FALSE	7.12927e+09	3.99568e+09	1.16119e+09	5.20483	9.28667	31.9555	1.85733	1.85733	6.1396	TRUE	FALSE	10.1393	9.66717	9.19807	2.69219	7.98514	23.517	1.59703	1.59703	8.73526	FALSE	FALSE
Solvent	M8FOSA	506.98	10	0.0197246	1	1.40951e+08	7.14592e+09	2.6443	8.99784	9.71195	10.4824	0.971195	1.02966	1.16499	FALSE	FALSE	8.92877e+09	2.05568e+09	1.88943e+09	8.00326	34.7619	37.8205	3.47619	3.47619	4.72564	FALSE	FALSE	7.12927e+09	3.99568e+09	1.16119e+09	10.0234	17.8841	61.5394	1.78841	1.78841	6.1396	TRUE	FALSE	10.1393	9.66717	9.19807	5.18457	15.3776	45.2886	1.53776	1.53776	8.73526	FALSE	FALSE
Solvent	M8FOSA	506.98	10	0.0197246	2	1.47196e+08	7.46253e+09	2.6443	9.4025	10.1569	10.9714	1.01569	1.01569	1.16686	FALSE	FALSE	8.92877e+09	2.05568e+09	1.88943e+09	8.35785	36.302	39.4962	3.6302	3.6302	4.72564	FALSE	FALSE	7.12927e+09	3.99568e+09	1.16119e+09	10.4675	18.6765	64.266	1.86765	1.86765	6.1396	TRUE	FALSE	10.1393	9.66717	9.19807	5.41428	16.059	47.2951	1.6059	1.6059	8.73526	FALSE	FALSE
Solvent	M8FOSA	506.98	10	0.0197246	3	1.44515e+08	7.32661e+09	2.6443	9.22271	9.96579	10.7684	0.996579	1.00343	1.1676	FALSE	FALSE	8.92877e+09	2.05568e+09	1.88943e+09	8.20562	35.6408	38.7768	3.56408	3.56408	4.72564	FALSE	FALSE	7.12927e+09	3.99568e+09	1.16119e+09	10.2768	18.3363	63.0955	1.83363	1.83363	6.1396	TRUE	FALSE	10.1393	9.66717	9.19807	5.31566	15.7665	46.4337	1.57665	1.57665	8.73526	FALSE	FALSE
Solvent	M8FOSA	506.98	25	0.0493116	1	3.73698e+08	7.5783e+09	2.6443	23.6494	25.5425	27.5893	1.0217	1.0217	1.1666	FALSE	FALSE	8.92877e+09	2.05568e+09	1.88943e+09	21.2188	92.163	100.272	3.68652	3.68652	4.72564	FALSE	FALSE	7.12927e+09	3.99568e+09	1.16119e+09	26.5746	47.4156	163.158	1.89662	1.89662	6.1396	TRUE	FALSE	10.1393	9.66717	9.19807	13.7457	40.7702	120.072	1.63081	1.63081	8.73526	FALSE	FALSE
Solvent	M8FOSA	506.98	25	0.0493116	2	3.7299e+08	7.56395e+09	2.6443	23.6004	25.4923	27.538	1.01969	1.01969	1.16684	FALSE	FALSE	8.92877e+09	2.05568e+09	1.88943e+09	21.1786	91.9884	100.082	3.67953	3.67953	4.72564	FALSE	FALSE	7.12927e+09	3.99568e+09	1.16119e+09	26.5243	47.3257	162.848	1.89303	1.89303	6.1396	TRUE	FALSE	10.1393	9.66717	9.19807	13.7196	40.693	119.845	1.62772	1.62772	8.73526	FALSE	FALSE
Solvent	M8FOSA	506.98	25	0.0493116	3	3.71477e+08	7.53325e+09	2.6443	23.4966	25.385	27.4273	1.0154	1.0154	1.16729	FALSE	FALSE	8.92877e+09	2.05568e+09	1.88943e+09	21.0926	91.6151	99.6762	3.6646	3.6646	4.72564	FALSE	FALSE	7.12927e+09	3.99568e+09	1.16119e+09	26.4167	47.1337	162.188	1.88535	1.88535	6.1396	TRUE	FALSE	10.1393	9.66717	9.19807	13.664	40.5279	119.358	1.62112	1.62112	8.73526	FALSE	FALSE
Solvent	M8FOSA	506.98	50	0.0986232	1	7.35107e+08	7.4537e+09	2.6443	46.0843	49.8281	53.8848	0.996561	1.00345	1.16927	FALSE	FALSE	8.92877e+09	2.05568e+09	1.88943e+09	41.7398	181.295	197.247	3.6259	3.6259	4.72564	FALSE	FALSE	7.12927e+09	3.99568e+09	1.16119e+09	52.2753	93.2718	320.95	1.86544	1.86544	6.1396	TRUE	FALSE	10.1393	9.66717	9.19807	27.0393	80.1998	236.196	1.604	1.604	8.73526	FALSE	FALSE
Solvent	M8FOSA	506.98	50	0.0986232	2	7.26384e+08	7.36525e+09	2.6443	45.5249	49.2061	53.1936	0.984121	1.01614	1.16845	FALSE	FALSE	8.92877e+09	2.05568e+09	1.88943e+09	41.2445	179.144	194.907	3.58288	3.58288	4.72564	FALSE	FALSE	7.12927e+09	3.99568e+09	1.16119e+09	51.655	92.1651	317.141	1.8433	1.8433	6.1396	TRUE	FALSE	10.1393	9.66717	9.19807	26.7185	79.2481	233.393	1.58496	1.58496	8.73526	FALSE	FALSE
Solvent	M8FOSA	506.98	50	0.0986232	3	7.23017e+08	7.33111e+09	2.6443	45.3141	48.9661	52.921	0.979323	1.02111	1.16787	FALSE	FALSE	8.92877e+09	2.05568e+09	1.88943e+09	41.0533	178.314	194.003	3.56627	3.56627	4.72564	FALSE	FALSE	7.12927e+09	3.99568e+09	1.16119e+09	51.4156	91.7379	315.671	1.83476	1.83476	6.1396	TRUE	FALSE	10.1393	9.66717	9.19807	26.5947	78.8808	232.311	1.57762	1.57762	8.73526	FALSE	FALSE
Solvent	M8FOSA	506.98	100	0.197246	1	1.29966e+09	6.58903e+09	2.6443	82.8408	86.5709	90.4758	0.865709	1.15512	1.09217	FALSE	TRUE	8.92877e+09	2.05568e+09	1.88943e+09	73.7955	320.528	348.731	3.20528	3.20528	4.72564	FALSE	FALSE	7.12927e+09	3.99568e+09	1.16119e+09	92.4222	164.904	567.436	1.64904	1.64904	6.1396	FALSE	FALSE	10.1393	9.66717	9.19807	47.8053	141.792	417.592	1.41792	1.41792	8.73526	FALSE	FALSE
Solvent	M8FOSA	506.98	100	0.197246	2	1.47269e+09	7.46625e+09	2.6443	91.5194	99.0357	107.197	0.990357	1.00974	1.1713	FALSE	FALSE	8.92877e+09	2.05568e+09	1.88943e+09	83.6202	363.201	395.159	3.63201	3.63201	4.72564	FALSE	FALSE	7.12927e+09	3.99568e+09	1.16119e+09	104.727	186.858	642.981	1.86858	1.86858	6.1396	TRUE	FALSE	10.1393	9.66717	9.19807	54.1698	160.67	473.187	1.6067	1.6067	8.73526	FALSE	FALSE
Solvent	M8FOSA	506.98	100	0.197246	3	1.45564e+09	7.37983e+09	2.6443	90.4277	97.7993	105.798	0.977993	1.0225	1.16998	FALSE	FALSE	8.92877e+09	2.05568e+09	1.88943e+09	82.6522	358.997	390.585	3.58997	3.58997	4.72564	FALSE	FALSE	7.12927e+09	3.99568e+09	1.16119e+09	103.515	184.695	635.538	1.84695	1.84695	6.1396	TRUE	FALSE	10.1393	9.66717	9.19807	53.5427	158.81	467.71	1.5881	1.5881	8.73526	FALSE	FALSE
Solvent	M8FOSA	506.98	250	0.493116	1	3.91815e+09	7.94569e+09	2.6443	242.938	262.688	284.148	1.05075	1.05075	1.16963	FALSE	FALSE	8.92877e+09	2.05568e+09	1.88943e+09	222.475	966.31	1051.33	3.86524	3.86524	4.72564	FALSE	FALSE	7.12927e+09	3.99568e+09	1.16119e+09	278.629	497.142	1710.67	1.98857	1.98857	6.1396	TRUE	FALSE	10.1393	9.66717	9.19807	144.121	427.468	1258.93	1.70987	1.70987	8.73526	FALSE	FALSE
Solvent	M8FOSA	506.98	250	0.493116	2	3.91688e+09	7.94312e+09	2.6443	242.837	262.591	284.056	1.05036	1.05036	1.16974	FALSE	FALSE	8.92877e+09	2.05568e+09	1.88943e+09	222.402	965.996	1050.99	3.86399	3.86399	4.72564	FALSE	FALSE	7.12927e+09	3.99568e+09	1.16119e+09	278.539	496.981	1710.12	1.98792	1.98792	6.1396	TRUE	FALSE	10.1393	9.66717	9.19807	144.074	427.329	1258.52	1.70932	1.70932	8.73526	FALSE	FALSE
Solvent	M8FOSA	506.98	250	0.493116	3	3.94024e+09	7.9905e+09	2.6443	244.711	264.377	285.727	1.05751	1.05751	1.16761	FALSE	FALSE	8.92877e+09	2.05568e+09	1.88943e+09	223.729	971.759	1057.26	3.88703	3.88703	4.72564	FALSE	FALSE	7.12927e+09	3.99568e+09	1.16119e+09	280.201	499.946	1720.32	1.99978	1.99978	6.1396	TRUE	FALSE	10.1393	9.66717	9.19807	144.933	429.878	1266.03	1.71951	1.71951	8.73526	FALSE	FALSE
Solvent	M2PFTeDA	715.961	0.5	0.000698362	1	2.97987e+06	4.26694e+09	2.41018	0.442032	0.483933	0.529522	0.967866	1.0332	1.19793	FALSE	FALSE	4.79448e+09	4.59842e+09	4.02616e+09	0.444985	0.463957	0.529902	0.927915	1.07769	1.19083	FALSE	FALSE	7.66434e+09	4.01998e+09	1.1639e+09	0.278363	0.530717	1.83304	1.06143	1.06143	6.58506	FALSE	FALSE	10.0592	9.58093	9.10458	0.186153	0.559955	1.67689	1.11991	1.11991	9.0081	FALSE	FALSE
Solvent	M2PFTeDA	715.961	0.5	0.000698362	2	3.03913e+06	4.35179e+09	2.41018	0.452063	0.4954	0.542596	0.990799	1.00929	1.20027	FALSE	FALSE	4.79448e+09	4.59842e+09	4.02616e+09	0.453834	0.473184	0.540439	0.946367	1.05667	1.19083	FALSE	FALSE	7.66434e+09	4.01998e+09	1.1639e+09	0.283899	0.54127	1.86949	1.08254	1.08254	6.58506	FALSE	FALSE	10.0592	9.58093	9.10458	0.189855	0.571091	1.71023	1.14218	1.14218	9.0081	FALSE	FALSE
Solvent	M2PFTeDA	715.961	0.5	0.000698362	3	2.99577e+06	4.28971e+09	2.41018	0.444667	0.487007	0.533092	0.974015	1.02668	1.19886	FALSE	FALSE	4.79448e+09	4.59842e+09	4.02616e+09	0.44736	0.466433	0.532729	0.932866	1.07197	1.19083	FALSE	FALSE	7.66434e+09	4.01998e+09	1.1639e+09	0.279849	0.533549	1.84282	1.0671	1.0671	6.58506	FALSE	FALSE	10.0592	9.58093	9.10458	0.187146	0.562943	1.68583	1.12589	1.12589	9.0081	FALSE	FALSE
Solvent	M2PFTeDA	715.961	1	0.00139672	1	5.99134e+06	4.28957e+09	2.41018	0.900611	0.984664	1.07612	0.984664	1.01557	1.19488	FALSE	FALSE	4.79448e+09	4.59842e+09	4.02616e+09	0.89469	0.932835	1.06542	0.932835	1.072	1.19083	FALSE	FALSE	7.66434e+09	4.01998e+09	1.1639e+09	0.559679	1.06706	3.68552	1.06706	1.06706	6.58506	FALSE	FALSE	10.0592	9.58093	9.10458	0.37428	1.12585	3.37155	1.12585	1.12585	9.0081	FALSE	FALSE
Solvent	M2PFTeDA	715.961	1	0.00139672	2	5.94791e+06	4.25847e+09	2.41018	0.893505	0.976564	1.06691	0.976564	1.024	1.19407	FALSE	FALSE	4.79448e+09	4.59842e+09	4.02616e+09	0.888203	0.926072	1.0577	0.926072	1.07983	1.19083	FALSE	FALSE	7.66434e+09	4.01998e+09	1.1639e+09	0.555621	1.05933	3.6588	1.05933	1.05933	6.58506	FALSE	FALSE	10.0592	9.58093	9.10458	0.371567	1.11769	3.34711	1.11769	1.11769	9.0081	FALSE	FALSE
Solvent	M2PFTeDA	715.961	1	0.00139672	3	5.95399e+06	4.26283e+09	2.41018	0.894492	0.977698	1.06821	0.977698	1.02281	1.19421	FALSE	FALSE	4.79448e+09	4.59842e+09	4.02616e+09	0.889112	0.92702	1.05878	0.92702	1.07873	1.19083	FALSE	FALSE	7.66434e+09	4.01998e+09	1.1639e+09	0.55619	1.06041	3.66255	1.06041	1.06041	6.58506	FALSE	FALSE	10.0592	9.58093	9.10458	0.371947	1.11883	3.35054	1.11883	1.11883	9.0081	FALSE	FALSE
Solvent	M2PFTeDA	715.961	5	0.00698362	1	3.07198e+07	4.39884e+09	2.41018	4.74802	5.17028	5.62934	1.03406	1.03406	1.18562	FALSE	FALSE	4.79448e+09	4.59842e+09	4.02616e+09	4.58741	4.78299	5.46282	0.956598	1.04537	1.19083	FALSE	FALSE	7.66434e+09	4.01998e+09	1.1639e+09	2.86968	5.47122	18.897	1.09424	1.09424	6.58506	FALSE	FALSE	10.0592	9.58093	9.10458	1.91907	5.77265	17.2872	1.15453	1.15453	9.0081	FALSE	FALSE
Solvent	M2PFTeDA	715.961	5	0.00698362	2	3.09735e+07	4.43516e+09	2.41018	4.79376	5.21579	5.67424	1.04316	1.04316	1.18367	FALSE	FALSE	4.79448e+09	4.59842e+09	4.02616e+09	4.62529	4.82249	5.50793	0.964497	1.03681	1.19083	FALSE	FALSE	7.66434e+09	4.01998e+09	1.1639e+09	2.89338	5.5164	19.0531	1.10328	1.10328	6.58506	FALSE	FALSE	10.0592	9.58093	9.10458	1.93492	5.82031	17.43	1.16406	1.16406	9.0081	FALSE	FALSE
Solvent	M2PFTeDA	715.961	5	0.00698362	3	3.09888e+07	4.43735e+09	2.41018	4.79655	5.21853	5.67691	1.04371	1.04371	1.18354	FALSE	FALSE	4.79448e+09	4.59842e+09	4.02616e+09	4.62757	4.82486	5.51064	0.964973	1.0363	1.19083	FALSE	FALSE	7.66434e+09	4.01998e+09	1.1639e+09	2.89481	5.51912	19.0625	1.10382	1.10382	6.58506	FALSE	FALSE	10.0592	9.58093	9.10458	1.93587	5.82318	17.4386	1.16464	1.16464	9.0081	FALSE	FALSE
Solvent	M2PFTeDA	715.961	10	0.0139672	1	5.88095e+07	4.21053e+09	2.41018	9.13789	9.96007	10.8558	0.996007	1.00401	1.188	FALSE	FALSE	4.79448e+09	4.59842e+09	4.02616e+09	8.78204	9.15647	10.4579	0.915647	1.09212	1.19083	FALSE	FALSE	7.66434e+09	4.01998e+09	1.1639e+09	5.49367	10.474	36.1762	1.0474	1.0474	6.58506	FALSE	FALSE	10.0592	9.58093	9.10458	3.67384	11.051	33.0943	1.1051	1.1051	9.0081	FALSE	FALSE
Solvent	M2PFTeDA	715.961	10	0.0139672	2	6.10501e+07	4.37095e+09	2.41018	9.52084	10.3617	11.2764	1.03617	1.03617	1.18439	FALSE	FALSE	4.79448e+09	4.59842e+09	4.02616e+09	9.11664	9.50533	10.8564	0.950533	1.05204	1.19083	FALSE	FALSE	7.66434e+09	4.01998e+09	1.1639e+09	5.70298	10.8731	37.5545	1.08731	1.08731	6.58506	FALSE	FALSE	10.0592	9.58093	9.10458	3.81381	11.4721	34.3552	1.14721	1.14721	9.0081	FALSE	FALSE
Solvent	M2PFTeDA	715.961	10	0.0139672	3	6.0571e+07	4.33665e+09	2.41018	9.43585	10.2757	11.19	1.02757	1.02757	1.1859	FALSE	FALSE	4.79448e+09	4.59842e+09	4.02616e+09	9.04509	9.43073	10.7712	0.943073	1.06036	1.19083	FALSE	FALSE	7.66434e+09	4.01998e+09	1.1639e+09	5.65822	10.7877	37.2597	1.07877	1.07877	6.58506	FALSE	FALSE	10.0592	9.58093	9.10458	3.78388	11.3821	34.0856	1.13821	1.13821	9.0081	FALSE	FALSE
Solvent	M2PFTeDA	715.961	25	0.0349181	1	1.50654e+08	4.31451e+09	2.41018	23.7561	25.8618	28.1569	1.03447	1.03447	1.18525	FALSE	FALSE	4.79448e+09	4.59842e+09	4.02616e+09	22.4973	23.4565	26.7904	0.938258	1.0658	1.19083	FALSE	FALSE	7.66434e+09	4.01998e+09	1.1639e+09	14.0733	26.8316	92.6738	1.07327	1.07327	6.58506	FALSE	FALSE	10.0592	9.58093	9.10458	9.41141	28.3099	84.7789	1.13239	1.13239	9.0081	FALSE	FALSE
Solvent	M2PFTeDA	715.961	25	0.0349181	2	1.52883e+08	4.37832e+09	2.41018	24.1674	26.2682	28.5544	1.05073	1.05073	1.18153	FALSE	FALSE	4.79448e+09	4.59842e+09	4.02616e+09	22.83	23.8034	27.1867	0.952135	1.05027	1.19083	FALSE	FALSE	7.66434e+09	4.01998e+09	1.1639e+09	14.2815	27.2285	94.0444	1.08914	1.08914	6.58506	FALSE	FALSE	10.0592	9.58093	9.10458	9.5506	28.7286	86.0328	1.14914	1.14914	9.0081	FALSE	FALSE
Solvent	M2PFTeDA	715.961	25	0.0349181	3	1.51928e+08	4.35098e+09	2.41018	23.9892	26.094	28.3863	1.04376	1.04376	1.18329	FALSE	FALSE	4.79448e+09	4.59842e+09	4.02616e+09	22.6875	23.6548	27.0169	0.946191	1.05687	1.19083	FALSE	FALSE	7.66434e+09	4.01998e+09	1.1639e+09	14.1923	27.0585	93.4572	1.08234	1.08234	6.58506	FALSE	FALSE	10.0592	9.58093	9.10458	9.49098	28.5492	85.4957	1.14197	1.14197	9.0081	FALSE	FALSE
Solvent	M2PFTeDA	715.961	50	0.0698362	1	2.83755e+08	4.06315e+09	2.41018	44.9118	48.959	53.3815	0.979179	1.02126	1.18858	FALSE	FALSE	4.79448e+09	4.59842e+09	4.02616e+09	42.3732	44.1798	50.4593	0.883596	1.13174	1.19083	FALSE	FALSE	7.66434e+09	4.01998e+09	1.1639e+09	26.5068	50.5369	174.549	1.01074	1.01074	6.58506	FALSE	FALSE	10.0592	9.58093	9.10458	17.7262	53.3211	159.679	1.06642	1.06642	9.0081	FALSE	FALSE
Solvent	M2PFTeDA	715.961	50	0.0698362	2	2.85956e+08	4.09467e+09	2.41018	45.2711	49.368	53.8466	0.987361	1.0128	1.18943	FALSE	FALSE	4.79448e+09	4.59842e+09	4.02616e+09	42.7019	44.5226	50.8508	0.890451	1.12303	1.19083	FALSE	FALSE	7.66434e+09	4.01998e+09	1.1639e+09	26.7125	50.929	175.903	1.01858	1.01858	6.58506	FALSE	FALSE	10.0592	9.58093	9.10458	17.8637	53.7348	160.918	1.0747	1.0747	9.0081	FALSE	FALSE
Solvent	M2PFTeDA	715.961	50	0.0698362	3	2.85407e+08	4.08681e+09	2.41018	45.1808	49.266	53.7314	0.985321	1.0149	1.18925	FALSE	FALSE	4.79448e+09	4.59842e+09	4.02616e+09	42.62	44.4371	50.7532	0.888743	1.12519	1.19083	FALSE	FALSE	7.66434e+09	4.01998e+09	1.1639e+09	26.6612	50.8312	175.566	1.01662	1.01662	6.58506	FALSE	FALSE	10.0592	9.58093	9.10458	17.8295	53.6317	160.61	1.07263	1.07263	9.0081	FALSE	FALSE
Solvent	M2PFTeDA	715.961	100	0.139672	1	5.00734e+08	3.58506e+09	2.41018	81.4478	86.0736	90.9728	0.860736	1.1618	1.11695	FALSE	TRUE	4.79448e+09	4.59842e+09	4.02616e+09	74.7749	77.9629	89.0441	0.779629	1.28266	1.19083	FALSE	TRUE	7.66434e+09	4.01998e+09	1.1639e+09	46.7759	89.1811	308.022	0.891811	1.12131	6.58506	FALSE	FALSE	10.0592	9.58093	9.10458	31.281	94.0944	281.782	0.940944	1.06276	9.0081	FALSE	FALSE
Solvent	M2PFTeDA	715.961	100	0.139672	2	5.6343e+08	4.03394e+09	2.41018	89.8113	98.0108	106.992	0.980108	1.0203	1.1913	FALSE	FALSE	4.79448e+09	4.59842e+09	4.02616e+09	84.1372	87.7245	100.193	0.877245	1.13993	1.19083	FALSE	FALSE	7.66434e+09	4.01998e+09	1.1639e+09	52.6326	100.347	346.589	1.00347	1.00347	6.58506	FALSE	FALSE	10.0592	9.58093	9.10458	35.1976	105.876	317.063	1.05876	1.05876	9.0081	FALSE	FALSE
Solvent	M2PFTeDA	715.961	100	0.139672	3	5.63627e+08	4.03535e+09	2.41018	89.8442	98.0486	107.035	0.980486	1.0199	1.19135	FALSE	FALSE	4.79448e+09	4.59842e+09	4.02616e+09	84.1666	87.7551	100.228	0.877551	1.13953	1.19083	FALSE	FALSE	7.66434e+09	4.01998e+09	1.1639e+09	52.651	100.382	346.71	1.00382	1.00382	6.58506	FALSE	FALSE	10.0592	9.58093	9.10458	35.2099	105.913	317.174	1.05913	1.05913	9.0081	FALSE	FALSE
Solvent	M2PFTeDA	715.961	250	0.349181	1	1.43451e+09	4.10823e+09	2.41018	231.528	253.329	277.317	1.01332	1.01332	1.19777	FALSE	FALSE	4.79448e+09	4.59842e+09	4.02616e+09	214.217	223.35	255.096	0.8934	1.11932	1.19083	FALSE	FALSE	7.66434e+09	4.01998e+09	1.1639e+09	134.005	255.488	882.43	1.02195	1.02195	6.58506	FALSE	FALSE	10.0592	9.58093	9.10458	89.6144	269.564	807.256	1.07825	1.07825	9.0081	FALSE	FALSE
Solvent	M2PFTeDA	715.961	250	0.349181	2	1.43887e+09	4.12069e+09	2.41018	232.369	254.224	278.268	1.0169	1.0169	1.19753	FALSE	FALSE	4.79448e+09	4.59842e+09	4.02616e+09	214.867	224.028	255.87	0.89611	1.11593	1.19083	FALSE	FALSE	7.66434e+09	4.01998e+09	1.1639e+09	134.411	256.263	885.107	1.02505	1.02505	6.58506	FALSE	FALSE	10.0592	9.58093	9.10458	89.8863	270.381	809.705	1.08153	1.08153	9.0081	FALSE	FALSE
Solvent	M2PFTeDA	715.961	250	0.349181	3	1.44365e+09	4.1344e+09	2.41018	233.303	255.209	279.306	1.02084	1.02084	1.19718	FALSE	FALSE	4.79448e+09	4.59842e+09	4.02616e+09	215.581	224.773	256.721	0.899092	1.11223	1.19083	FALSE	FALSE	7.66434e+09	4.01998e+09	1.1639e+09	134.858	257.116	888.052	1.02846	1.02846	6.58506	FALSE	FALSE	10.0592	9.58093	9.10458	90.1854	271.281	812.399	1.08512	1.08512	9.0081	FALSE	FALSE
Solvent	M2-4:2 FTS	329.988	0.469	0.00142126	1	1.49179e+06	1.04962e+09	1.79624	0.431773	0.476255	0.524995	1.01547	1.01547	1.2159	FALSE	FALSE	5.12766e+09	1.44451e+09	1.24579e+09	0.0960034	0.34079	0.395151	0.726631	1.37621	4.11601	FALSE	TRUE	7.64381e+09	4.1196e+09	1.35319e+09	0.0644016	0.119495	0.363787	0.254787	3.92484	5.64873	FALSE	TRUE	9.76478	9.34075	8.91937	0.0846102	0.224623	0.592698	0.47894	2.08795	7.00505	FALSE	FALSE
Solvent	M2-4:2 FTS	329.988	0.469	0.00142126	2	1.54968e+06	1.09035e+09	1.79624	0.453175	0.497918	0.54677	1.06166	1.06166	1.20653	FALSE	FALSE	5.12766e+09	1.44451e+09	1.24579e+09	0.0997286	0.354014	0.410484	0.754827	1.32481	4.11601	FALSE	TRUE	7.64381e+09	4.1196e+09	1.35319e+09	0.0669005	0.124132	0.377903	0.264674	3.77823	5.64873	FALSE	TRUE	9.76478	9.34075	8.91937	0.0878933	0.233339	0.615697	0.497524	2.00995	7.00505	FALSE	FALSE
Solvent	M2-4:2 FTS	329.988	0.469	0.00142126	3	1.43364e+06	1.00871e+09	1.79624	0.412315	0.454572	0.50085	0.969238	1.03174	1.21472	FALSE	FALSE	5.12766e+09	1.44451e+09	1.24579e+09	0.0922611	0.327506	0.379747	0.698306	1.43204	4.11601	FALSE	TRUE	7.64381e+09	4.1196e+09	1.35319e+09	0.0618911	0.114837	0.349606	0.244856	4.08404	5.64873	FALSE	TRUE	9.76478	9.34075	8.91937	0.081312	0.215867	0.569594	0.46027	2.17264	7.00505	FALSE	FALSE
Solvent	M2-6:2 FTS	429.982	0.4755	0.00110586	1	1.40176e+06	1.26757e+09	1.98041	0.432429	0.476563	0.524882	1.00224	1.00224	1.2138	FALSE	FALSE	7.68634e+09	1.44451e+09	1.00735e+09	0.0784159	0.417258	0.598334	0.877515	1.13958	7.63026	FALSE	FALSE	7.66133e+09	4.12069e+09	1.23091e+09	0.0786719	0.14627	0.489663	0.307612	3.25085	6.22411	FALSE	FALSE	9.8203	9.39325	8.96769	0.0911634	0.243711	0.649287	0.512537	1.95108	7.12223	FALSE	FALSE
Solvent	M2-6:2 FTS	429.982	0.4755	0.00110586	2	1.40585e+06	1.27127e+09	1.98041	0.433924	0.478187	0.526644	1.00565	1.00565	1.21368	FALSE	FALSE	7.68634e+09	1.44451e+09	1.00735e+09	0.0786445	0.418474	0.600077	0.880072	1.13627	7.63026	FALSE	FALSE	7.66133e+09	4.12069e+09	1.23091e+09	0.0789012	0.146696	0.49109	0.308509	3.2414	6.22411	FALSE	FALSE	9.8203	9.39325	8.96769	0.0914291	0.244422	0.651179	0.514031	1.94541	7.12223	FALSE	FALSE
Solvent	M2-6:2 FTS	429.982	0.4755	0.00110586	3	1.46485e+06	1.32463e+09	1.98041	0.456794	0.501684	0.550676	1.05507	1.05507	1.20552	FALSE	FALSE	7.68634e+09	1.44451e+09	1.00735e+09	0.0819454	0.436039	0.625264	0.917011	1.0905	7.63026	FALSE	FALSE	7.66133e+09	4.12069e+09	1.23091e+09	0.0822129	0.152853	0.511702	0.321458	3.11083	6.22411	FALSE	FALSE	9.8203	9.39325	8.96769	0.0952666	0.254681	0.678511	0.535606	1.86704	7.12223	FALSE	FALSE
Solvent	M2-8:2 FTS	529.976	0.48	0.000905702	1	1.2234e+06	1.35077e+09	1.78056	0.415535	0.461261	0.511655	0.96096	1.04063	1.23132	FALSE	FALSE	8.92877e+09	1.27536e+09	1.00735e+09	0.0726158	0.508382	0.643639	1.05913	1.05913	8.86362	FALSE	FALSE	7.65292e+09	4.1184e+09	1.16705e+09	0.0847219	0.157432	0.555561	0.327984	3.04893	6.55747	FALSE	FALSE	9.68359	9.26323	8.84479	0.134347	0.353668	0.926904	0.736809	1.3572	6.89931	FALSE	FALSE
Solvent	M2-8:2 FTS	529.976	0.48	0.000905702	2	1.29687e+06	1.43189e+09	1.78056	0.444535	0.493613	0.547724	1.02836	1.02836	1.23213	FALSE	FALSE	8.92877e+09	1.27536e+09	1.00735e+09	0.076977	0.538914	0.682294	1.12274	1.12274	8.86362	FALSE	FALSE	7.65292e+09	4.1184e+09	1.16705e+09	0.0898101	0.166887	0.588927	0.347682	2.87619	6.55747	FALSE	FALSE	9.68359	9.26323	8.84479	0.142416	0.374909	0.982572	0.78106	1.28031	6.89931	FALSE	FALSE
Solvent	M2-8:2 FTS	529.976	0.48	0.000905702	3	1.30861e+06	1.44486e+09	1.78056	0.449546	0.498797	0.553061	1.03916	1.03916	1.23027	FALSE	FALSE	8.92877e+09	1.27536e+09	1.00735e+09	0.0776737	0.543792	0.68847	1.1329	1.1329	8.86362	FALSE	FALSE	7.65292e+09	4.1184e+09	1.16705e+09	0.090623	0.168398	0.594258	0.350829	2.85039	6.55747	FALSE	FALSE	9.68359	9.26323	8.84479	0.143705	0.378302	0.991465	0.78813	1.26883	6.89931	FALSE	FALSE
Solvent	M2-4:2 FTS	329.988	0.938	0.00284253	1	2.95655e+06	1.04011e+09	1.79624	0.854953	0.941149	1.03555	1.00336	1.00336	1.21124	FALSE	FALSE	5.12766e+09	1.44451e+09	1.24579e+09	0.190267	0.675406	0.783142	0.720049	1.38879	4.11601	FALSE	TRUE	7.64381e+09	4.1196e+09	1.35319e+09	0.127636	0.236826	0.720982	0.252479	3.96072	5.64873	FALSE	TRUE	9.76478	9.34075	8.91937	0.167687	0.445176	1.17466	0.474601	2.10703	7.00505	FALSE	FALSE
Solvent	M2-4:2 FTS	329.988	0.938	0.00284253	2	2.97571e+06	1.04686e+09	1.79624	0.861275	0.947972	1.04291	1.01063	1.01063	1.21089	FALSE	FALSE	5.12766e+09	1.44451e+09	1.24579e+09	0.191501	0.679783	0.788218	0.724716	1.37985	4.11601	FALSE	TRUE	7.64381e+09	4.1196e+09	1.35319e+09	0.128464	0.238361	0.725655	0.254116	3.93521	5.64873	FALSE	TRUE	9.76478	9.34075	8.91937	0.168774	0.448061	1.18227	0.477677	2.09346	7.00505	FALSE	FALSE
Solvent	M2-4:2 FTS	329.988	0.938	0.00284253	3	2.83078e+06	9.95867e+08	1.79624	0.815956	0.896438	0.984408	0.955691	1.04636	1.20645	FALSE	FALSE	5.12766e+09	1.44451e+09	1.24579e+09	0.182173	0.646674	0.749827	0.689418	1.4505	4.11601	FALSE	TRUE	7.64381e+09	4.1196e+09	1.35319e+09	0.122207	0.226751	0.690312	0.241739	4.1367	5.64873	FALSE	TRUE	9.76478	9.34075	8.91937	0.160554	0.426238	1.12469	0.454411	2.20065	7.00505	FALSE	FALSE
Solvent	M2-6:2 FTS	429.982	0.951	0.00221172	1	2.77063e+06	1.2527e+09	1.98041	0.853187	0.938004	1.03078	0.986334	1.01386	1.20815	FALSE	FALSE	7.68634e+09	1.44451e+09	1.00735e+09	0.154992	0.824725	1.18263	0.867219	1.15311	7.63026	FALSE	FALSE	7.66133e+09	4.12069e+09	1.23091e+09	0.155498	0.289107	0.967835	0.304003	3.28944	6.22411	FALSE	FALSE	9.8203	9.39325	8.96769	0.180188	0.481704	1.28334	0.506523	1.97424	7.12223	FALSE	FALSE
Solvent	M2-6:2 FTS	429.982	0.951	0.00221172	2	2.74015e+06	1.23892e+09	1.98041	0.843111	0.926481	1.01763	0.974218	1.02646	1.20699	FALSE	FALSE	7.68634e+09	1.44451e+09	1.00735e+09	0.153287	0.815652	1.16962	0.857678	1.16594	7.63026	FALSE	FALSE	7.66133e+09	4.12069e+09	1.23091e+09	0.153787	0.285926	0.957188	0.300658	3.32603	6.22411	FALSE	FALSE	9.8203	9.39325	8.96769	0.178205	0.476404	1.26922	0.500951	1.9962	7.12223	FALSE	FALSE
Solvent	M2-6:2 FTS	429.982	0.951	0.00221172	3	2.80746e+06	1.26936e+09	1.98041	0.865746	0.951938	1.04623	1.00099	1.00099	1.20847	FALSE	FALSE	7.68634e+09	1.44451e+09	1.00735e+09	0.157052	0.835689	1.19835	0.878748	1.13798	7.63026	FALSE	FALSE	7.66133e+09	4.12069e+09	1.23091e+09	0.157565	0.29295	0.980702	0.308044	3.24629	6.22411	FALSE	FALSE	9.8203	9.39325	8.96769	0.182583	0.488108	1.3004	0.513257	1.94834	7.12223	FALSE	FALSE
Solvent	M2-8:2 FTS	529.976	0.96	0.0018114	1	2.54989e+06	1.40768e+09	1.78056	0.866224	0.960388	1.06421	1.0004	1.0004	1.22856	FALSE	FALSE	8.92877e+09	1.27536e+09	1.00735e+09	0.151351	1.05961	1.34152	1.10376	1.10376	8.86362	FALSE	FALSE	7.65292e+09	4.1184e+09	1.16705e+09	0.176583	0.328131	1.15794	0.341803	2.92566	6.55747	FALSE	FALSE	9.68359	9.26323	8.84479	0.280016	0.73714	1.93192	0.767854	1.30233	6.89931	FALSE	FALSE
Solvent	M2-8:2 FTS	529.976	0.96	0.0018114	2	2.54234e+06	1.40352e+09	1.78056	0.863373	0.957237	1.06073	0.997122	1.00289	1.22859	FALSE	FALSE	8.92877e+09	1.27536e+09	1.00735e+09	0.150903	1.05647	1.33755	1.10049	1.10049	8.86362	FALSE	FALSE	7.65292e+09	4.1184e+09	1.16705e+09	0.176061	0.327161	1.15452	0.340792	2.93434	6.55747	FALSE	FALSE	9.68359	9.26323	8.84479	0.279188	0.73496	1.9262	0.765583	1.30619	6.89931	FALSE	FALSE
Solvent	M2-8:2 FTS	529.976	0.96	0.0018114	3	2.55211e+06	1.40891e+09	1.78056	0.867066	0.961315	1.06523	1.00137	1.00137	1.22855	FALSE	FALSE	8.92877e+09	1.27536e+09	1.00735e+09	0.151483	1.06053	1.34268	1.10472	1.10472	8.86362	FALSE	FALSE	7.65292e+09	4.1184e+09	1.16705e+09	0.176737	0.328417	1.15895	0.342101	2.92311	6.55747	FALSE	FALSE	9.68359	9.26323	8.84479	0.28026	0.737782	1.9336	0.768523	1.3012	6.89931	FALSE	FALSE
Solvent	M2-4:2 FTS	329.988	4.69	0.0142126	1	1.48511e+07	1.04492e+09	1.79624	4.2972	4.71597	5.1747	1.00554	1.00554	1.2042	FALSE	FALSE	5.12766e+09	1.44451e+09	1.24579e+09	0.955733	3.39263	3.93381	0.723376	1.38241	4.11601	FALSE	TRUE	7.64381e+09	4.1196e+09	1.35319e+09	0.64113	1.1896	3.62157	0.253646	3.9425	5.64873	FALSE	TRUE	9.76478	9.34075	8.91937	0.842311	2.23616	5.90043	0.476794	2.09734	7.00505	FALSE	FALSE
Solvent	M2-4:2 FTS	329.988	4.69	0.0142126	2	1.50064e+07	1.05585e+09	1.79624	4.34574	4.76787	5.23016	1.0166	1.0166	1.20351	FALSE	FALSE	5.12766e+09	1.44451e+09	1.24579e+09	0.965732	3.42813	3.97496	0.730944	1.36809	4.11601	FALSE	TRUE	7.64381e+09	4.1196e+09	1.35319e+09	0.647838	1.20205	3.65946	0.2563	3.90168	5.64873	FALSE	TRUE	9.76478	9.34075	8.91937	0.851124	2.25956	5.96216	0.481782	2.07563	7.00505	FALSE	FALSE
Solvent	M2-4:2 FTS	329.988	4.69	0.0142126	3	1.51929e+07	1.06897e+09	1.79624	4.40558	4.83019	5.29489	1.02989	1.02989	1.20186	FALSE	FALSE	5.12766e+09	1.44451e+09	1.24579e+09	0.977734	3.47073	4.02436	0.740028	1.3513	4.11601	FALSE	TRUE	7.64381e+09	4.1196e+09	1.35319e+09	0.655889	1.21698	3.70494	0.259485	3.85379	5.64873	FALSE	TRUE	9.76478	9.34075	8.91937	0.861701	2.28764	6.03626	0.48777	2.05015	7.00505	FALSE	FALSE
Solvent	M2-6:2 FTS	429.982	4.755	0.0110586	1	1.41037e+07	1.27536e+09	1.98041	4.33727	4.75477	5.21162	0.999951	1.00005	1.20159	FALSE	FALSE	7.68634e+09	1.44451e+09	1.00735e+09	0.788975	4.19821	6.02008	0.882904	1.13263	7.63026	FALSE	FALSE	7.66133e+09	4.12069e+09	1.23091e+09	0.791551	1.47168	4.9267	0.309501	3.231	6.22411	FALSE	FALSE	9.8203	9.39325	8.96769	0.917233	2.45208	6.53274	0.515685	1.93917	7.12223	FALSE	FALSE
Solvent	M2-6:2 FTS	429.982	4.755	0.0110586	2	1.42124e+07	1.28519e+09	1.98041	4.37275	4.79325	5.25335	1.00804	1.00804	1.20138	FALSE	FALSE	7.68634e+09	1.44451e+09	1.00735e+09	0.795057	4.23057	6.06649	0.88971	1.12396	7.63026	FALSE	FALSE	7.66133e+09	4.12069e+09	1.23091e+09	0.797653	1.48302	4.96468	0.311887	3.20629	6.22411	FALSE	FALSE	9.8203	9.39325	8.96769	0.924304	2.47098	6.5831	0.51966	1.92433	7.12223	FALSE	FALSE
Solvent	M2-6:2 FTS	429.982	4.755	0.0110586	3	1.44871e+07	1.31003e+09	1.98041	4.46531	4.89052	5.35541	1.0285	1.0285	1.19934	FALSE	FALSE	7.68634e+09	1.44451e+09	1.00735e+09	0.810426	4.31235	6.18376	0.906908	1.10265	7.63026	FALSE	FALSE	7.66133e+09	4.12069e+09	1.23091e+09	0.813071	1.51169	5.06065	0.317916	3.14549	6.22411	FALSE	FALSE	9.8203	9.39325	8.96769	0.94217	2.51875	6.71035	0.529705	1.88784	7.12223	FALSE	FALSE
Solvent	M2-8:2 FTS	529.976	4.8	0.00905702	1	1.2941e+07	1.42884e+09	1.78056	4.3426	4.79888	5.3021	0.999767	1.00023	1.22095	FALSE	FALSE	8.92877e+09	1.27536e+09	1.00735e+09	0.768125	5.37763	6.80836	1.12034	1.12034	8.86362	FALSE	FALSE	7.65292e+09	4.1184e+09	1.16705e+09	0.896182	1.66531	5.87669	0.346939	2.88235	6.55747	FALSE	FALSE	9.68359	9.26323	8.84479	1.42112	3.74108	9.80472	0.779391	1.28305	6.89931	FALSE	FALSE
Solvent	M2-8:2 FTS	529.976	4.8	0.00905702	2	1.32326e+07	1.46103e+09	1.78056	4.44736	4.91172	5.42358	1.02328	1.02328	1.21951	FALSE	FALSE	8.92877e+09	1.27536e+09	1.00735e+09	0.785432	5.4988	6.96177	1.14558	1.14558	8.86362	FALSE	FALSE	7.65292e+09	4.1184e+09	1.16705e+09	0.916374	1.70283	6.0091	0.354756	2.81884	6.55747	FALSE	FALSE	9.68359	9.26323	8.84479	1.45314	3.82537	10.0256	0.796952	1.25478	6.89931	FALSE	FALSE
Solvent	M2-8:2 FTS	529.976	4.8	0.00905702	3	1.33855e+07	1.47791e+09	1.78056	4.50433	4.97092	5.48487	1.03561	1.03561	1.21769	FALSE	FALSE	8.92877e+09	1.27536e+09	1.00735e+09	0.794508	5.56234	7.04221	1.15882	1.15882	8.86362	FALSE	FALSE	7.65292e+09	4.1184e+09	1.16705e+09	0.926964	1.72251	6.07854	0.358855	2.78664	6.55747	FALSE	FALSE	9.68359	9.26323	8.84479	1.46993	3.86958	10.1415	0.806161	1.24045	6.89931	FALSE	FALSE
Solvent	M2-4:2 FTS	329.988	9.38	0.0284253	1	2.81815e+07	9.91424e+08	1.79624	8.15366	8.91907	9.75586	0.950861	1.05168	1.1965	FALSE	FALSE	5.12766e+09	1.44451e+09	1.24579e+09	1.81361	6.43789	7.46482	0.686342	1.457	4.11601	FALSE	TRUE	7.64381e+09	4.1196e+09	1.35319e+09	1.21661	2.25739	6.87232	0.24066	4.15524	5.64873	FALSE	TRUE	9.76478	9.34075	8.91937	1.59838	4.24336	11.1967	0.452384	2.21051	7.00505	FALSE	FALSE
Solvent	M2-4:2 FTS	329.988	9.38	0.0284253	2	2.97221e+07	1.04562e+09	1.79624	8.59482	9.42811	10.3417	1.00513	1.00513	1.20325	FALSE	FALSE	5.12766e+09	1.44451e+09	1.24579e+09	1.91275	6.78983	7.8729	0.723863	1.38148	4.11601	FALSE	TRUE	7.64381e+09	4.1196e+09	1.35319e+09	1.28312	2.3808	7.24801	0.253817	3.93985	5.64873	FALSE	TRUE	9.76478	9.34075	8.91937	1.68576	4.47534	11.8088	0.477115	2.09593	7.00505	FALSE	FALSE
Solvent	M2-4:2 FTS	329.988	9.38	0.0284253	3	2.9463e+07	1.03651e+09	1.79624	8.51657	9.34242	10.2479	0.995994	1.00402	1.20329	FALSE	FALSE	5.12766e+09	1.44451e+09	1.24579e+09	1.89608	6.73064	7.80427	0.717552	1.39363	4.11601	FALSE	TRUE	7.64381e+09	4.1196e+09	1.35319e+09	1.27194	2.36004	7.18482	0.251604	3.9745	5.64873	FALSE	TRUE	9.76478	9.34075	8.91937	1.67106	4.43632	11.7059	0.472955	2.11437	7.00505	FALSE	FALSE
Solvent	M2-6:2 FTS	429.982	9.51	0.0221172	1	2.70215e+07	1.22174e+09	1.98041	8.29914	9.07085	9.91385	0.953823	1.04841	1.19456	FALSE	FALSE	7.68634e+09	1.44451e+09	1.00735e+09	1.51161	8.04342	11.534	0.845785	1.18233	7.63026	FALSE	FALSE	7.66133e+09	4.12069e+09	1.23091e+09	1.51654	2.81961	9.43915	0.296489	3.3728	6.22411	FALSE	TRUE	9.8203	9.39325	8.96769	1.75734	4.69798	12.5162	0.494004	2.02427	7.12223	FALSE	FALSE
Solvent	M2-6:2 FTS	429.982	9.51	0.0221172	2	2.8458e+07	1.28669e+09	1.98041	8.7371	9.5732	10.4889	1.00665	1.00665	1.2005	FALSE	FALSE	7.68634e+09	1.44451e+09	1.00735e+09	1.59197	8.471	12.1471	0.890747	1.12265	7.63026	FALSE	FALSE	7.66133e+09	4.12069e+09	1.23091e+09	1.59716	2.9695	9.94093	0.312251	3.20256	6.22411	FALSE	FALSE	9.8203	9.39325	8.96769	1.85076	4.94773	13.1815	0.520266	1.9221	7.12223	FALSE	FALSE
Solvent	M2-6:2 FTS	429.982	9.51	0.0221172	3	2.86752e+07	1.29651e+09	1.98041	8.80822	9.64926	10.5702	1.01464	1.01464	1.20004	FALSE	FALSE	7.68634e+09	1.44451e+09	1.00735e+09	1.60412	8.53568	12.2399	0.897548	1.11415	7.63026	FALSE	FALSE	7.66133e+09	4.12069e+09	1.23091e+09	1.60936	2.99218	10.0168	0.314635	3.17829	6.22411	FALSE	FALSE	9.8203	9.39325	8.96769	1.86489	4.9855	13.2822	0.524238	1.90753	7.12223	FALSE	FALSE
Solvent	M2-8:2 FTS	529.976	9.6	0.018114	1	2.45597e+07	1.35584e+09	1.78056	8.2065	9.02846	9.93217	0.940465	1.0633	1.21028	FALSE	FALSE	8.92877e+09	1.27536e+09	1.00735e+09	1.45776	10.2058	12.9211	1.0631	1.0631	8.86362	FALSE	FALSE	7.65292e+09	4.1184e+09	1.16705e+09	1.70079	3.16046	11.1529	0.329214	3.03754	6.55747	FALSE	FALSE	9.68359	9.26323	8.84479	2.69703	7.0999	18.6076	0.739573	1.35213	6.89931	FALSE	FALSE
Solvent	M2-8:2 FTS	529.976	9.6	0.018114	2	2.61658e+07	1.44451e+09	1.78056	8.7279	9.63987	10.6466	1.00415	1.00415	1.21983	FALSE	FALSE	8.92877e+09	1.27536e+09	1.00735e+09	1.5531	10.8732	13.7661	1.13263	1.13263	8.86362	FALSE	FALSE	7.65292e+09	4.1184e+09	1.16705e+09	1.81202	3.36714	11.8823	0.350744	2.85108	6.55747	FALSE	FALSE	9.68359	9.26323	8.84479	2.8734	7.56421	19.8245	0.787939	1.26913	6.89931	FALSE	FALSE
Solvent	M2-8:2 FTS	529.976	9.6	0.018114	3	2.63735e+07	1.45597e+09	1.78056	8.80084	9.71902	10.7325	1.0124	1.0124	1.21948	FALSE	FALSE	8.92877e+09	1.27536e+09	1.00735e+09	1.56543	10.9595	13.8753	1.14162	1.14162	8.86362	FALSE	FALSE	7.65292e+09	4.1184e+09	1.16705e+09	1.8264	3.39387	11.9766	0.353528	2.82863	6.55747	FALSE	FALSE	9.68359	9.26323	8.84479	2.89621	7.62426	19.9819	0.794194	1.25914	6.89931	FALSE	FALSE
Solvent	M2-4:2 FTS	329.988	23.45	0.0710631	1	7.53315e+07	1.06006e+09	1.79624	21.7722	23.8781	26.1906	1.01825	1.01825	1.20293	FALSE	FALSE	5.12766e+09	1.44451e+09	1.24579e+09	4.84792	17.209	19.9541	0.73386	1.36266	4.11601	FALSE	TRUE	7.64381e+09	4.1196e+09	1.35319e+09	3.25211	6.0342	18.3703	0.257322	3.88618	5.64873	FALSE	TRUE	9.76478	9.34075	8.91937	4.27259	11.3429	29.9297	0.483704	2.06738	7.00505	FALSE	FALSE
Solvent	M2-4:2 FTS	329.988	23.45	0.0710631	2	7.53141e+07	1.05982e+09	1.79624	21.7668	23.8723	26.1845	1.01801	1.01801	1.20296	FALSE	FALSE	5.12766e+09	1.44451e+09	1.24579e+09	4.84681	17.2051	19.9495	0.733691	1.36297	4.11601	FALSE	TRUE	7.64381e+09	4.1196e+09	1.35319e+09	3.25136	6.03281	18.3661	0.257263	3.88708	5.64873	FALSE	TRUE	9.76478	9.34075	8.91937	4.27161	11.3402	29.9228	0.483593	2.06786	7.00505	FALSE	FALSE
Solvent	M2-4:2 FTS	329.988	23.45	0.0710631	3	7.55754e+07	1.0635e+09	1.79624	21.8492	23.959	26.2756	1.02171	1.02171	1.20259	FALSE	FALSE	5.12766e+09	1.44451e+09	1.24579e+09	4.86362	17.2647	20.0187	0.736236	1.35826	4.11601	FALSE	TRUE	7.64381e+09	4.1196e+09	1.35319e+09	3.26264	6.05374	18.4298	0.258155	3.87364	5.64873	FALSE	TRUE	9.76478	9.34075	8.91937	4.28643	11.3796	30.0266	0.48527	2.06071	7.00505	FALSE	FALSE
Solvent	M2-6:2 FTS	429.982	23.775	0.055293	1	7.27148e+07	1.31508e+09	1.98041	22.2852	24.4036	26.7262	1.02644	1.02644	1.19928	FALSE	FALSE	7.68634e+09	1.44451e+09	1.00735e+09	4.06774	21.6448	31.0379	0.910403	1.09842	7.63026	FALSE	FALSE	7.66133e+09	4.12069e+09	1.23091e+09	4.08102	7.58758	25.4007	0.319141	3.13341	6.22411	FALSE	FALSE	9.8203	9.39325	8.96769	4.729	12.6423	33.681	0.531746	1.8806	7.12223	FALSE	FALSE
Solvent	M2-6:2 FTS	429.982	23.775	0.055293	2	7.16256e+07	1.29538e+09	1.98041	21.9228	24.0217	26.3246	1.01038	1.01038	1.20079	FALSE	FALSE	7.68634e+09	1.44451e+09	1.00735e+09	4.00681	21.3206	30.573	0.896765	1.11512	7.63026	FALSE	FALSE	7.66133e+09	4.12069e+09	1.23091e+09	4.01989	7.47392	25.0202	0.31436	3.18106	6.22411	FALSE	FALSE	9.8203	9.39325	8.96769	4.65816	12.4529	33.1765	0.523781	1.9092	7.12223	FALSE	FALSE
Solvent	M2-6:2 FTS	429.982	23.775	0.055293	3	7.12231e+07	1.2881e+09	1.98041	21.7921	23.8808	26.1725	1.00445	1.00445	1.20101	FALSE	FALSE	7.68634e+09	1.44451e+09	1.00735e+09	3.98429	21.2008	30.4012	0.891726	1.12142	7.63026	FALSE	FALSE	7.66133e+09	4.12069e+09	1.23091e+09	3.9973	7.43192	24.8797	0.312594	3.19904	6.22411	FALSE	FALSE	9.8203	9.39325	8.96769	4.63199	12.3829	32.9901	0.520838	1.91998	7.12223	FALSE	FALSE
Solvent	M2-8:2 FTS	529.976	24	0.0452851	1	6.63376e+07	1.46489e+09	1.78056	21.9371	24.2302	26.7666	1.00959	1.00959	1.22015	FALSE	FALSE	8.92877e+09	1.27536e+09	1.00735e+09	3.93753	27.5666	34.9007	1.14861	1.14861	8.86362	FALSE	FALSE	7.65292e+09	4.1184e+09	1.16705e+09	4.59397	8.53663	30.1248	0.355693	2.81141	6.55747	FALSE	FALSE	9.68359	9.26323	8.84479	7.28487	19.1774	50.2605	0.799057	1.25148	6.89931	FALSE	FALSE
Solvent	M2-8:2 FTS	529.976	24	0.0452851	2	6.64373e+07	1.46709e+09	1.78056	21.972	24.268	26.8075	1.01117	1.01117	1.22008	FALSE	FALSE	8.92877e+09	1.27536e+09	1.00735e+09	3.94345	27.608	34.9532	1.15033	1.15033	8.86362	FALSE	FALSE	7.65292e+09	4.1184e+09	1.16705e+09	4.60088	8.54946	30.1701	0.356227	2.80719	6.55747	FALSE	FALSE	9.68359	9.26323	8.84479	7.29582	19.2062	50.3361	0.800258	1.2496	6.89931	FALSE	FALSE
Solvent	M2-8:2 FTS	529.976	24	0.0452851	3	6.63566e+07	1.46531e+09	1.78056	21.9437	24.2374	26.7744	1.00989	1.00989	1.22014	FALSE	FALSE	8.92877e+09	1.27536e+09	1.00735e+09	3.93866	27.5745	34.9108	1.14894	1.14894	8.86362	FALSE	FALSE	7.65292e+09	4.1184e+09	1.16705e+09	4.59529	8.53907	30.1335	0.355795	2.81061	6.55747	FALSE	FALSE	9.68359	9.26323	8.84479	7.28696	19.1829	50.275	0.799286	1.25112	6.89931	FALSE	FALSE
Solvent	M2-4:2 FTS	329.988	46.9	0.142126	1	1.458e+08	1.02585e+09	1.79624	41.9945	46.0831	50.5815	0.982583	1.01773	1.20448	FALSE	FALSE	5.12766e+09	1.44451e+09	1.24579e+09	9.38288	33.3071	38.62	0.710172	1.40811	4.11601	FALSE	TRUE	7.64381e+09	4.1196e+09	1.35319e+09	6.29428	11.6789	35.5547	0.249016	4.0158	5.64873	FALSE	TRUE	9.76478	9.34075	8.91937	8.26937	21.9535	57.9273	0.468091	2.13634	7.00505	FALSE	FALSE
Solvent	M2-4:2 FTS	329.988	46.9	0.142126	2	1.45163e+08	1.02137e+09	1.79624	41.8087	45.8694	50.336	0.978025	1.02247	1.20396	FALSE	FALSE	5.12766e+09	1.44451e+09	1.24579e+09	9.34188	33.1615	38.4513	0.707069	1.41429	4.11601	FALSE	TRUE	7.64381e+09	4.1196e+09	1.35319e+09	6.26678	11.6278	35.3993	0.247928	4.03343	5.64873	FALSE	TRUE	9.76478	9.34075	8.91937	8.23323	21.8575	57.6742	0.466046	2.14571	7.00505	FALSE	FALSE
Solvent	M2-4:2 FTS	329.988	46.9	0.142126	3	1.47573e+08	1.03832e+09	1.79624	42.5223	46.6785	51.253	0.995277	1.00475	1.20532	FALSE	FALSE	5.12766e+09	1.44451e+09	1.24579e+09	9.49699	33.7121	39.0897	0.718809	1.39119	4.11601	FALSE	TRUE	7.64381e+09	4.1196e+09	1.35319e+09	6.37083	11.8209	35.9871	0.252045	3.96755	5.64873	FALSE	TRUE	9.76478	9.34075	8.91937	8.36993	22.2205	58.6318	0.473784	2.11067	7.00505	FALSE	FALSE
Solvent	M2-6:2 FTS	429.982	47.55	0.110586	1	1.39803e+08	1.2642e+09	1.98041	42.6105	46.7054	51.2053	0.982237	1.01808	1.20171	FALSE	FALSE	7.68634e+09	1.44451e+09	1.00735e+09	7.82074	41.6149	59.6743	0.875182	1.14262	7.63026	FALSE	FALSE	7.66133e+09	4.12069e+09	1.23091e+09	7.84627	14.5881	48.8361	0.306794	3.25951	6.22411	FALSE	FALSE	9.8203	9.39325	8.96769	9.0921	24.3063	64.756	0.511174	1.95628	7.12223	FALSE	FALSE
Solvent	M2-6:2 FTS	429.982	47.55	0.110586	2	1.39041e+08	1.25731e+09	1.98041	42.3765	46.4357	50.895	0.976565	1.024	1.20102	FALSE	FALSE	7.68634e+09	1.44451e+09	1.00735e+09	7.77811	41.388	59.349	0.870411	1.14888	7.63026	FALSE	FALSE	7.66133e+09	4.12069e+09	1.23091e+09	7.8035	14.5085	48.5699	0.305122	3.27738	6.22411	FALSE	FALSE	9.8203	9.39325	8.96769	9.04254	24.1738	64.403	0.508388	1.967	7.12223	FALSE	FALSE
Solvent	M2-6:2 FTS	429.982	47.55	0.110586	3	1.37766e+08	1.24579e+09	1.98041	41.9924	45.9848	50.3679	0.967084	1.03404	1.19945	FALSE	FALSE	7.68634e+09	1.44451e+09	1.00735e+09	7.7068	41.0086	58.8049	0.862431	1.15951	7.63026	FALSE	FALSE	7.66133e+09	4.12069e+09	1.23091e+09	7.73196	14.3755	48.1246	0.302324	3.30771	6.22411	FALSE	FALSE	9.8203	9.39325	8.96769	8.95963	23.9522	63.8125	0.503727	1.9852	7.12223	FALSE	FALSE
Solvent	M2-8:2 FTS	529.976	48	0.0905702	1	1.29957e+08	1.43487e+09	1.78056	42.6191	47.0893	52.0422	0.981026	1.01934	1.2211	FALSE	FALSE	8.92877e+09	1.27536e+09	1.00735e+09	7.7137	54.0035	68.3713	1.12507	1.12507	8.86362	FALSE	FALSE	7.65292e+09	4.1184e+09	1.16705e+09	8.99968	16.7234	59.0152	0.348405	2.87023	6.55747	FALSE	FALSE	9.68359	9.26323	8.84479	14.2712	37.5688	98.4614	0.782684	1.27765	6.89931	FALSE	FALSE
Solvent	M2-8:2 FTS	529.976	48	0.0905702	2	1.28691e+08	1.4209e+09	1.78056	42.205	46.6065	51.4804	0.970968	1.0299	1.21977	FALSE	FALSE	8.92877e+09	1.27536e+09	1.00735e+09	7.63857	53.4775	67.7054	1.11411	1.11411	8.86362	FALSE	FALSE	7.65292e+09	4.1184e+09	1.16705e+09	8.91203	16.5605	58.4404	0.345011	2.89846	6.55747	FALSE	FALSE	9.68359	9.26323	8.84479	14.1322	37.2029	97.5025	0.775061	1.29022	6.89931	FALSE	FALSE
Solvent	M2-8:2 FTS	529.976	48	0.0905702	3	1.29724e+08	1.43231e+09	1.78056	42.5423	47.0006	51.9398	0.979179	1.02126	1.2209	FALSE	FALSE	8.92877e+09	1.27536e+09	1.00735e+09	7.69991	53.9069	68.249	1.12306	1.12306	8.86362	FALSE	FALSE	7.65292e+09	4.1184e+09	1.16705e+09	8.98359	16.6935	58.9096	0.347782	2.87537	6.55747	FALSE	FALSE	9.68359	9.26323	8.84479	14.2457	37.5017	98.2854	0.781284	1.27994	6.89931	FALSE	FALSE
Solvent	M2-4:2 FTS	329.988	93.8	0.284253	1	2.59444e+08	9.12724e+08	1.79624	75.8168	81.0581	86.6766	0.864159	1.15719	1.14324	FALSE	TRUE	5.12766e+09	1.44451e+09	1.24579e+09	16.6964	59.2684	68.7225	0.63186	1.58263	4.11601	FALSE	TRUE	7.64381e+09	4.1196e+09	1.35319e+09	11.2004	20.782	63.2679	0.221556	4.51352	5.64873	FALSE	TRUE	9.76478	9.34075	8.91937	14.715	39.0652	103.079	0.416473	2.40111	7.00505	FALSE	FALSE
Solvent	M2-4:2 FTS	329.988	93.8	0.284253	2	2.86026e+08	1.00624e+09	1.79624	82.1488	90.1107	98.8783	0.960668	1.04094	1.20365	FALSE	FALSE	5.12766e+09	1.44451e+09	1.24579e+09	18.4071	65.341	75.7637	0.696599	1.43555	4.11601	FALSE	TRUE	7.64381e+09	4.1196e+09	1.35319e+09	12.348	22.9113	69.7502	0.244257	4.09405	5.64873	FALSE	TRUE	9.76478	9.34075	8.91937	16.2226	43.0678	113.64	0.459144	2.17796	7.00505	FALSE	FALSE
Solvent	M2-4:2 FTS	329.988	93.8	0.284253	3	2.90249e+08	1.02109e+09	1.79624	83.3703	91.559	100.588	0.976109	1.02448	1.20652	FALSE	FALSE	5.12766e+09	1.44451e+09	1.24579e+09	18.6788	66.3055	76.8822	0.706882	1.41466	4.11601	FALSE	TRUE	7.64381e+09	4.1196e+09	1.35319e+09	12.5302	23.2495	70.7799	0.247863	4.03449	5.64873	FALSE	TRUE	9.76478	9.34075	8.91937	16.4621	43.7035	115.318	0.465922	2.14628	7.00505	FALSE	FALSE
Solvent	M2-6:2 FTS	429.982	95.1	0.221172	1	2.49583e+08	1.12845e+09	1.98041	77.0704	82.3361	87.9762	0.865784	1.15502	1.1415	FALSE	TRUE	7.68634e+09	1.44451e+09	1.00735e+09	13.9619	74.2926	106.533	0.781205	1.28007	7.63026	FALSE	FALSE	7.66133e+09	4.12069e+09	1.23091e+09	14.0075	26.0432	87.1842	0.273851	3.65162	6.22411	FALSE	TRUE	9.8203	9.39325	8.96769	16.2316	43.3927	115.605	0.456285	2.19162	7.12223	FALSE	FALSE
Solvent	M2-6:2 FTS	429.982	95.1	0.221172	2	2.80603e+08	1.26871e+09	1.98041	85.19	93.4822	102.618	0.982988	1.01731	1.20457	FALSE	FALSE	7.68634e+09	1.44451e+09	1.00735e+09	15.6972	83.5264	119.774	0.878301	1.13856	7.63026	FALSE	FALSE	7.66133e+09	4.12069e+09	1.23091e+09	15.7485	29.2801	98.0203	0.307888	3.24794	6.22411	FALSE	FALSE	9.8203	9.39325	8.96769	18.249	48.7859	129.974	0.512996	1.94933	7.12223	FALSE	FALSE
Solvent	M2-6:2 FTS	429.982	95.1	0.221172	3	2.76369e+08	1.24957e+09	1.98041	83.8777	91.951	100.836	0.966888	1.03425	1.20218	FALSE	FALSE	7.68634e+09	1.44451e+09	1.00735e+09	15.4604	82.2661	117.967	0.865048	1.15601	7.63026	FALSE	FALSE	7.66133e+09	4.12069e+09	1.23091e+09	15.5108	28.8383	96.5413	0.303242	3.2977	6.22411	FALSE	FALSE	9.8203	9.39325	8.96769	17.9737	48.0498	128.012	0.505255	1.9792	7.12223	FALSE	FALSE
Solvent	M2-8:2 FTS	529.976	96	0.18114	1	2.28974e+08	1.26407e+09	1.78056	76.1255	81.5369	87.3488	0.849343	1.17738	1.14743	FALSE	TRUE	8.92877e+09	1.27536e+09	1.00735e+09	13.591	95.1502	120.465	0.991148	1.00893	8.86362	FALSE	FALSE	7.65292e+09	4.1184e+09	1.16705e+09	15.8568	29.4655	103.98	0.306932	3.25805	6.55747	FALSE	FALSE	9.68359	9.26323	8.84479	25.1448	66.1935	173.482	0.689516	1.45029	6.89931	FALSE	FALSE
Solvent	M2-8:2 FTS	529.976	96	0.18114	2	2.64416e+08	1.45973e+09	1.78056	86.0365	95.2061	105.397	0.991731	1.00834	1.22503	FALSE	FALSE	8.92877e+09	1.27536e+09	1.00735e+09	15.6947	109.878	139.112	1.14456	1.14456	8.86362	FALSE	FALSE	7.65292e+09	4.1184e+09	1.16705e+09	18.3112	34.0263	120.075	0.354441	2.82135	6.55747	FALSE	FALSE	9.68359	9.26323	8.84479	29.0369	76.4394	200.335	0.796244	1.2559	6.89931	FALSE	FALSE
Solvent	M2-8:2 FTS	529.976	96	0.18114	3	2.58062e+08	1.42465e+09	1.78056	83.9109	92.738	102.535	0.96602	1.03517	1.22195	FALSE	FALSE	8.92877e+09	1.27536e+09	1.00735e+09	15.3175	107.238	135.768	1.11706	1.11706	8.86362	FALSE	FALSE	7.65292e+09	4.1184e+09	1.16705e+09	17.8711	33.2086	117.19	0.345923	2.89082	6.55747	FALSE	FALSE	9.68359	9.26323	8.84479	28.3391	74.6024	195.52	0.777109	1.28682	6.89931	FALSE	FALSE
Solvent	M2-4:2 FTS	329.988	234.5	0.710631	1	7.89977e+08	1.11166e+09	1.79624	229.587	251.655	275.986	1.07316	1.07316	1.20209	FALSE	FALSE	5.12766e+09	1.44451e+09	1.24579e+09	50.8386	180.465	209.252	0.769576	1.29942	4.11601	FALSE	TRUE	7.64381e+09	4.1196e+09	1.35319e+09	34.1039	63.2788	192.643	0.269846	3.70582	5.64873	FALSE	TRUE	9.76478	9.34075	8.91937	44.8053	118.949	313.864	0.507245	1.97143	7.00505	FALSE	FALSE
Solvent	M2-4:2 FTS	329.988	234.5	0.710631	2	7.86919e+08	1.10735e+09	1.79624	228.414	250.534	274.937	1.06837	1.06837	1.20368	FALSE	FALSE	5.12766e+09	1.44451e+09	1.24579e+09	50.6418	179.767	208.442	0.766596	1.30447	4.11601	FALSE	TRUE	7.64381e+09	4.1196e+09	1.35319e+09	33.9718	63.0338	191.898	0.268801	3.72023	5.64873	FALSE	TRUE	9.76478	9.34075	8.91937	44.6319	118.488	312.648	0.505281	1.9791	7.00505	FALSE	FALSE
Solvent	M2-4:2 FTS	329.988	234.5	0.710631	3	7.81228e+08	1.09934e+09	1.79624	226.266	248.449	272.951	1.05948	1.05948	1.20633	FALSE	FALSE	5.12766e+09	1.44451e+09	1.24579e+09	50.2756	178.467	206.935	0.761052	1.31397	4.11601	FALSE	TRUE	7.64381e+09	4.1196e+09	1.35319e+09	33.7262	62.578	190.51	0.266857	3.74733	5.64873	FALSE	TRUE	9.76478	9.34075	8.91937	44.3091	117.632	310.388	0.501627	1.99351	7.00505	FALSE	FALSE
Solvent	M2-6:2 FTS	429.982	237.75	0.55293	1	7.73942e+08	1.39971e+09	1.98041	238.736	260.393	284.146	1.09524	1.09524	1.19021	TRUE	FALSE	7.68634e+09	1.44451e+09	1.00735e+09	43.2951	230.377	330.353	0.968989	1.032	7.63026	FALSE	FALSE	7.66133e+09	4.12069e+09	1.23091e+09	43.4364	80.7586	270.353	0.339679	2.94396	6.22411	FALSE	FALSE	9.8203	9.39325	8.96769	50.3333	134.558	358.485	0.565965	1.76689	7.12223	FALSE	FALSE
Solvent	M2-6:2 FTS	429.982	237.75	0.55293	2	7.55366e+08	1.36611e+09	1.98041	231.05	253.22	277.658	1.06507	1.06507	1.20172	FALSE	FALSE	7.68634e+09	1.44451e+09	1.00735e+09	42.2559	224.848	322.424	0.945732	1.05738	7.63026	FALSE	FALSE	7.66133e+09	4.12069e+09	1.23091e+09	42.3939	78.8202	263.864	0.331526	3.01636	6.22411	FALSE	FALSE	9.8203	9.39325	8.96769	49.1252	131.329	349.881	0.552381	1.81034	7.12223	FALSE	FALSE
Solvent	M2-6:2 FTS	429.982	237.75	0.55293	3	7.51723e+08	1.35953e+09	1.98041	229.606	251.817	276.32	1.05917	1.05917	1.20345	FALSE	FALSE	7.68634e+09	1.44451e+09	1.00735e+09	42.0521	223.763	320.869	0.94117	1.06251	7.63026	FALSE	FALSE	7.66133e+09	4.12069e+09	1.23091e+09	42.1894	78.44	262.592	0.329927	3.03098	6.22411	FALSE	FALSE	9.8203	9.39325	8.96769	48.8882	130.695	348.193	0.549717	1.81912	7.12223	FALSE	FALSE
Solvent	M2-8:2 FTS	529.976	240	0.452851	1	7.18853e+08	1.58739e+09	1.78056	234.862	259.153	286.124	1.0798	1.0798	1.21826	FALSE	FALSE	8.92877e+09	1.27536e+09	1.00735e+09	42.6682	298.719	378.195	1.24466	1.24466	8.86362	FALSE	FALSE	7.65292e+09	4.1184e+09	1.16705e+09	49.7816	92.5054	326.442	0.385439	2.59444	6.55747	FALSE	FALSE	9.68359	9.26323	8.84479	78.941	207.811	544.638	0.865881	1.15489	6.89931	FALSE	FALSE
Solvent	M2-8:2 FTS	529.976	240	0.452851	2	7.23606e+08	1.59789e+09	1.78056	236.928	261.112	287.93	1.08797	1.08797	1.21526	FALSE	FALSE	8.92877e+09	1.27536e+09	1.00735e+09	42.9503	300.694	380.695	1.25289	1.25289	8.86362	FALSE	FALSE	7.65292e+09	4.1184e+09	1.16705e+09	50.1107	93.1169	328.6	0.387987	2.5774	6.55747	FALSE	FALSE	9.68359	9.26323	8.84479	79.4628	209.185	548.239	0.871605	1.14731	6.89931	FALSE	FALSE
Solvent	M2-8:2 FTS	529.976	240	0.452851	3	7.08539e+08	1.56462e+09	1.78056	230.503	254.909	282.073	1.06212	1.06212	1.22373	FALSE	FALSE	8.92877e+09	1.27536e+09	1.00735e+09	42.056	294.433	372.768	1.22681	1.22681	8.86362	FALSE	FALSE	7.65292e+09	4.1184e+09	1.16705e+09	49.0673	91.1781	321.758	0.379909	2.63221	6.55747	FALSE	FALSE	9.68359	9.26323	8.84479	77.8083	204.83	536.824	0.853457	1.1717	6.89931	FALSE	FALSE
DW	MPFBA	218	10	0.0458716	1	8.90492e+06	1.94127e+08		7.79511	9.73754	12.0621	0.973754	1.02695	1.5474	FALSE	FALSE	7.40159e+08	5.8605e+08	2.80296e+08	2.62278	3.31247	6.92579	0.331247	3.0189	2.64063	FALSE	TRUE	3.22285e+09	8.36581e+08	3.57782e+08	0.602347	2.32048	5.42584	0.232048	4.30945	9.00784	FALSE	TRUE
DW	MPFBA	218	10	0.0458716	2	7.3173e+06	1.59517e+08		6.5841	7.68802	8.93692	0.768802	1.30073	1.35735	FALSE	TRUE	7.40159e+08	5.8605e+08	2.80296e+08	2.15517	2.7219	5.69102	0.27219	3.6739	2.64063	FALSE	TRUE	3.22285e+09	8.36581e+08	3.57782e+08	0.494957	1.90677	4.45849	0.190677	5.24446	9.00784	FALSE	TRUE
DW	MPFBA	218	10	0.0458716	3	9.21248e+06	2.00832e+08		8.12175	10.1339	12.5414	1.01339	1.01339	1.54418	FALSE	FALSE	7.40159e+08	5.8605e+08	2.80296e+08	2.71336	3.42687	7.16499	0.342687	2.91811	2.64063	FALSE	TRUE	3.22285e+09	8.36581e+08	3.57782e+08	0.623151	2.40063	5.61324	0.240063	4.16558	9.00784	FALSE	TRUE
DW	MPFBA	218	25	0.114679	1	2.5062e+07	2.1854e+08		20.9688	25.712	31.4346	1.02848	1.02848	1.49912	FALSE	FALSE	7.40159e+08	5.8605e+08	2.80296e+08	7.38154	9.32259	19.4919	0.372904	2.68166	2.64063	FALSE	TRUE	3.22285e+09	8.36581e+08	3.57782e+08	1.69524	6.53076	15.2705	0.26123	3.82804	9.00784	FALSE	TRUE
DW	MPFBA	218	25	0.114679	2	2.60075e+07	2.26785e+08		21.8694	26.7038	32.5186	1.06815	1.06815	1.48694	FALSE	FALSE	7.40159e+08	5.8605e+08	2.80296e+08	7.66001	9.6743	20.2273	0.386972	2.58417	2.64063	FALSE	TRUE	3.22285e+09	8.36581e+08	3.57782e+08	1.7592	6.77714	15.8466	0.271086	3.68887	9.00784	FALSE	TRUE
DW	MPFBA	218	25	0.114679	3	2.56195e+07	2.23402e+08		21.492	26.297	32.0855	1.05188	1.05188	1.4929	FALSE	FALSE	7.40159e+08	5.8605e+08	2.80296e+08	7.54573	9.52996	19.9255	0.381199	2.62331	2.64063	FALSE	TRUE	3.22285e+09	8.36581e+08	3.57782e+08	1.73295	6.67603	15.6102	0.267041	3.74474	9.00784	FALSE	TRUE
DW	MPFBA	218	50	0.229358	1	5.5513e+07	2.42037e+08		44.4754	54.0302	65.6571	1.0806	1.0806	1.47626	FALSE	FALSE	7.40159e+08	5.8605e+08	2.80296e+08	16.3503	20.6498	43.1751	0.412996	2.42133	2.64063	FALSE	TRUE	3.22285e+09	8.36581e+08	3.57782e+08	3.75501	14.4658	33.8245	0.289316	3.45642	9.00784	FALSE	TRUE
DW	MPFBA	218	50	0.229358	2	5.51859e+07	2.4061e+08		44.1744	53.7128	65.3288	1.07426	1.07426	1.47888	FALSE	FALSE	7.40159e+08	5.8605e+08	2.80296e+08	16.254	20.5281	42.9207	0.410563	2.43568	2.64063	FALSE	TRUE	3.22285e+09	8.36581e+08	3.57782e+08	3.73289	14.3806	33.6252	0.287612	3.47691	9.00784	FALSE	TRUE
DW	MPFBA	218	50	0.229358	3	5.52391e+07	2.40842e+08		44.2231	53.7644	65.3826	1.07529	1.07529	1.47847	FALSE	FALSE	7.40159e+08	5.8605e+08	2.80296e+08	16.2696	20.5479	42.9621	0.410959	2.43334	2.64063	FALSE	TRUE	3.22285e+09	8.36581e+08	3.57782e+08	3.73649	14.3945	33.6577	0.287889	3.47356	9.00784	FALSE	TRUE
DW	MPFBA	218	100	0.458716	1	1.11064e+08	2.4212e+08		83.9705	102.74	126.109	1.0274	1.0274	1.50183	FALSE	FALSE	7.40159e+08	5.8605e+08	2.80296e+08	32.7119	41.3138	86.3799	0.413138	2.4205	2.64063	FALSE	TRUE	3.22285e+09	8.36581e+08	3.57782e+08	7.5126	28.9416	67.6723	0.289416	3.45524	9.00784	FALSE	TRUE
DW	MPFBA	218	100	0.458716	2	1.0784e+08	2.35091e+08		81.4452	99.679	122.374	0.99679	1.00322	1.50253	FALSE	FALSE	7.40159e+08	5.8605e+08	2.80296e+08	31.7622	40.1144	83.8722	0.401144	2.49287	2.64063	FALSE	TRUE	3.22285e+09	8.36581e+08	3.57782e+08	7.2945	28.1014	65.7077	0.281014	3.55855	9.00784	FALSE	TRUE
DW	MPFBA	218	100	0.458716	3	1.12586e+08	2.45438e+08		85.2162	104.188	127.797	1.04188	1.04188	1.49968	FALSE	FALSE	7.40159e+08	5.8605e+08	2.80296e+08	33.1602	41.88	87.5637	0.4188	2.38778	2.64063	FALSE	TRUE	3.22285e+09	8.36581e+08	3.57782e+08	7.61556	29.3382	68.5997	0.293382	3.40853	9.00784	FALSE	TRUE
DW	MPFBA	218	250	1.14679	1	2.40313e+08	2.09553e+08		171.773	201.66	237.74	0.806638	1.23971	1.38404	FALSE	TRUE	7.40159e+08	5.8605e+08	2.80296e+08	70.7797	89.392	186.903	0.357568	2.79667	2.64063	FALSE	TRUE	3.22285e+09	8.36581e+08	3.57782e+08	16.2553	62.6218	146.425	0.250487	3.99222	9.00784	FALSE	TRUE
DW	MPFBA	218	250	1.14679	2	2.88478e+08	2.51553e+08		201	248.86	310.674	0.995442	1.00458	1.54565	FALSE	FALSE	7.40159e+08	5.8605e+08	2.80296e+08	84.9658	107.308	224.363	0.429234	2.32973	2.64063	FALSE	TRUE	3.22285e+09	8.36581e+08	3.57782e+08	19.5132	75.1729	175.772	0.300691	3.32567	9.00784	FALSE	TRUE
DW	MPFBA	218	250	1.14679	3	2.87839e+08	2.50996e+08		200.501	248.214	309.825	0.992857	1.00719	1.54525	FALSE	FALSE	7.40159e+08	5.8605e+08	2.80296e+08	84.7776	107.071	223.866	0.428283	2.3349	2.64063	FALSE	TRUE	3.22285e+09	8.36581e+08	3.57782e+08	19.47	75.0064	175.383	0.300025	3.33305	9.00784	FALSE	TRUE
DW	M5PFPeA	269	5	0.0185874	1	5.02852e+06	2.70535e+08	1.22644	3.73352	4.61984	5.68516	0.923968	1.08229	1.52273	FALSE	FALSE	7.40567e+08	5.89882e+08	2.04756e+08	1.82654	2.29312	6.60626	0.458625	2.18043	3.61682	FALSE	FALSE	3.22825e+09	8.42853e+08	3.24623e+08	0.419011	1.60488	4.16691	0.320975	3.11551	9.94463	FALSE	TRUE	8.96316	8.43578	7.88833	1.47241	4.95916	17.4928	0.991832	1.00824	11.8804	FALSE	FALSE
DW	M5PFPeA	269	5	0.0185874	2	4.60321e+06	2.47653e+08	1.22644	3.42622	4.16123	5.02994	0.832247	1.20157	1.46807	FALSE	FALSE	7.40567e+08	5.89882e+08	2.04756e+08	1.67205	2.09917	6.0475	0.419834	2.38189	3.61682	FALSE	FALSE	3.22825e+09	8.42853e+08	3.24623e+08	0.383571	1.46914	3.81447	0.293827	3.40336	9.94463	FALSE	TRUE	8.96316	8.43578	7.88833	1.34787	4.53972	16.0132	0.907943	1.10139	11.8804	FALSE	FALSE
DW	M5PFPeA	269	5	0.0185874	3	4.66116e+06	2.5077e+08	1.22644	3.46413	4.22361	5.12432	0.844722	1.18382	1.47925	FALSE	FALSE	7.40567e+08	5.89882e+08	2.04756e+08	1.6931	2.1256	6.12363	0.425119	2.35228	3.61682	FALSE	FALSE	3.22825e+09	8.42853e+08	3.24623e+08	0.3884	1.48763	3.86249	0.297526	3.36105	9.94463	FALSE	TRUE	8.96316	8.43578	7.88833	1.36484	4.59686	16.2148	0.919372	1.0877	11.8804	FALSE	FALSE
DW	M5PFPeA	269	10	0.0371747	1	1.14296e+07	3.07457e+08	1.22644	8.46245	10.3805	12.6938	1.03805	1.03805	1.50002	FALSE	FALSE	7.40567e+08	5.89882e+08	2.04756e+08	4.15164	5.21217	15.0157	0.521217	1.91859	3.61682	FALSE	FALSE	3.22825e+09	8.42853e+08	3.24623e+08	0.952395	3.64781	9.47121	0.364781	2.74137	9.94463	FALSE	TRUE	8.96316	8.43578	7.88833	3.34673	11.272	39.7603	1.1272	1.1272	11.8804	FALSE	FALSE
DW	M5PFPeA	269	10	0.0371747	2	1.24264e+07	3.34269e+08	1.22644	9.37327	11.3504	13.7095	1.13504	1.13504	1.46262	FALSE	FALSE	7.40567e+08	5.89882e+08	2.04756e+08	4.51369	5.66671	16.3252	0.566671	1.76469	3.61682	FALSE	FALSE	3.22825e+09	8.42853e+08	3.24623e+08	1.03545	3.96593	10.2972	0.396593	2.52148	9.94463	FALSE	FALSE	8.96316	8.43578	7.88833	3.63858	12.255	43.2277	1.2255	1.2255	11.8804	FALSE	FALSE
DW	M5PFPeA	269	10	0.0371747	3	1.23617e+07	3.32531e+08	1.22644	9.31028	11.2875	13.6493	1.12875	1.12875	1.46604	FALSE	FALSE	7.40567e+08	5.89882e+08	2.04756e+08	4.49022	5.63724	16.2403	0.563724	1.77392	3.61682	FALSE	FALSE	3.22825e+09	8.42853e+08	3.24623e+08	1.03007	3.9453	10.2436	0.39453	2.53466	9.94463	FALSE	FALSE	8.96316	8.43578	7.88833	3.61966	12.1912	43.0029	1.21912	1.21912	11.8804	FALSE	FALSE
DW	M5PFPeA	269	25	0.0929368	1	2.95881e+07	3.18369e+08	1.22644	21.2626	25.9351	31.6128	1.0374	1.0374	1.48678	FALSE	FALSE	7.40567e+08	5.89882e+08	2.04756e+08	10.7475	13.4929	38.8716	0.539715	1.85283	3.61682	FALSE	FALSE	3.22825e+09	8.42853e+08	3.24623e+08	2.46549	9.44319	24.5184	0.377727	2.64741	9.94463	FALSE	TRUE	8.96316	8.43578	7.88833	8.66375	29.18	102.929	1.1672	1.1672	11.8804	FALSE	FALSE
DW	M5PFPeA	269	25	0.0929368	2	3.01415e+07	3.24323e+08	1.22644	21.7009	26.4316	32.1734	1.05727	1.05727	1.48258	FALSE	FALSE	7.40567e+08	5.89882e+08	2.04756e+08	10.9485	13.7452	39.5987	0.54981	1.81881	3.61682	FALSE	FALSE	3.22825e+09	8.42853e+08	3.24623e+08	2.5116	9.6198	24.9769	0.384792	2.59881	9.94463	FALSE	TRUE	8.96316	8.43578	7.88833	8.82579	29.7258	104.854	1.18903	1.18903	11.8804	FALSE	FALSE
DW	M5PFPeA	269	25	0.0929368	3	3.04698e+07	3.27855e+08	1.22644	21.967	26.7262	32.4971	1.06905	1.06905	1.47936	FALSE	FALSE	7.40567e+08	5.89882e+08	2.04756e+08	11.0677	13.8949	40.0299	0.555798	1.79922	3.61682	FALSE	FALSE	3.22825e+09	8.42853e+08	3.24623e+08	2.53895	9.72457	25.249	0.388983	2.57081	9.94463	FALSE	FALSE	8.96316	8.43578	7.88833	8.92191	30.0495	105.996	1.20198	1.20198	11.8804	FALSE	FALSE
DW	M5PFPeA	269	50	0.185874	1	6.24889e+07	3.3619e+08	1.22644	43.925	53.4385	65.0831	1.06877	1.06877	1.48169	FALSE	FALSE	7.40567e+08	5.89882e+08	2.04756e+08	22.6982	28.4964	82.0952	0.569928	1.75461	3.61682	FALSE	FALSE	3.22825e+09	8.42853e+08	3.24623e+08	5.207	19.9436	51.7817	0.398872	2.50707	9.94463	FALSE	FALSE	8.96316	8.43578	7.88833	18.2975	61.6269	217.381	1.23254	1.23254	11.8804	FALSE	FALSE
DW	M5PFPeA	269	50	0.185874	2	6.09471e+07	3.27896e+08	1.22644	42.726	52.0842	63.5587	1.04168	1.04168	1.48759	FALSE	FALSE	7.40567e+08	5.89882e+08	2.04756e+08	22.1381	27.7933	80.0697	0.555866	1.79899	3.61682	FALSE	FALSE	3.22825e+09	8.42853e+08	3.24623e+08	5.07853	19.4515	50.5041	0.389031	2.57049	9.94463	FALSE	FALSE	8.96316	8.43578	7.88833	17.846	60.1064	212.017	1.20213	1.20213	11.8804	FALSE	FALSE
DW	M5PFPeA	269	50	0.185874	3	6.05242e+07	3.2562e+08	1.22644	42.4055	51.713	63.1288	1.03426	1.03426	1.48869	FALSE	FALSE	7.40567e+08	5.89882e+08	2.04756e+08	21.9845	27.6004	79.5141	0.552009	1.81157	3.61682	FALSE	FALSE	3.22825e+09	8.42853e+08	3.24623e+08	5.04329	19.3166	50.1537	0.386331	2.58845	9.94463	FALSE	FALSE	8.96316	8.43578	7.88833	17.7222	59.6893	210.546	1.19379	1.19379	11.8804	FALSE	FALSE
DW	M5PFPeA	269	100	0.371747	1	1.20771e+08	3.24874e+08	1.22644	82.1584	100.527	123.351	1.00527	1.00527	1.50138	FALSE	FALSE	7.40567e+08	5.89882e+08	2.04756e+08	43.8683	55.0744	158.664	0.550744	1.81572	3.61682	FALSE	FALSE	3.22825e+09	8.42853e+08	3.24623e+08	10.0635	38.5446	100.078	0.385446	2.5944	9.94463	FALSE	FALSE	8.96316	8.43578	7.88833	35.3632	119.105	420.127	1.19105	1.19105	11.8804	FALSE	FALSE
DW	M5PFPeA	269	100	0.371747	2	1.19031e+08	3.20193e+08	1.22644	80.9217	98.9897	121.429	0.989897	1.01021	1.50057	FALSE	FALSE	7.40567e+08	5.89882e+08	2.04756e+08	43.2362	54.2809	156.378	0.542809	1.84227	3.61682	FALSE	FALSE	3.22825e+09	8.42853e+08	3.24623e+08	9.91848	37.9893	98.6356	0.379893	2.63232	9.94463	FALSE	TRUE	8.96316	8.43578	7.88833	34.8537	117.389	414.074	1.17389	1.17389	11.8804	FALSE	FALSE
DW	M5PFPeA	269	100	0.371747	3	1.20639e+08	3.24519e+08	1.22644	82.0635	100.411	123.206	1.00411	1.00411	1.50135	FALSE	FALSE	7.40567e+08	5.89882e+08	2.04756e+08	43.8204	55.0143	158.491	0.550143	1.81771	3.61682	FALSE	FALSE	3.22825e+09	8.42853e+08	3.24623e+08	10.0525	38.5025	99.9682	0.385025	2.59723	9.94463	FALSE	TRUE	8.96316	8.43578	7.88833	35.3245	118.975	419.668	1.18975	1.18975	11.8804	FALSE	FALSE
DW	M5PFPeA	269	250	0.929368	1	2.54903e+08	2.74276e+08	1.22644	168.504	198.643	234.92	0.794573	1.25854	1.39416	FALSE	TRUE	7.40567e+08	5.89882e+08	2.04756e+08	92.5898	116.242	334.881	0.464967	2.15069	3.61682	FALSE	FALSE	3.22825e+09	8.42853e+08	3.24623e+08	21.2403	81.3534	211.227	0.325414	3.07301	9.94463	FALSE	TRUE	8.96316	8.43578	7.88833	74.6386	251.387	886.733	1.00555	1.00555	11.8804	FALSE	FALSE
DW	M5PFPeA	269	250	0.929368	2	3.16989e+08	3.4108e+08	1.22644	207.186	255.916	317.951	1.02366	1.02366	1.53462	FALSE	FALSE	7.40567e+08	5.89882e+08	2.04756e+08	115.142	144.554	416.447	0.578217	1.72945	3.61682	FALSE	FALSE	3.22825e+09	8.42853e+08	3.24623e+08	26.4137	101.168	262.674	0.404674	2.47113	9.94463	FALSE	FALSE	8.96316	8.43578	7.88833	92.8181	312.617	1102.71	1.25047	1.25047	11.8804	FALSE	FALSE
DW	M5PFPeA	269	250	0.929368	3	3.06721e+08	3.30032e+08	1.22644	199.455	246.178	305.581	0.984712	1.01553	1.53208	FALSE	FALSE	7.40567e+08	5.89882e+08	2.04756e+08	111.412	139.872	402.957	0.559488	1.78735	3.61682	FALSE	FALSE	3.22825e+09	8.42853e+08	3.24623e+08	25.5581	97.8913	254.166	0.391565	2.55385	9.94463	FALSE	FALSE	8.96316	8.43578	7.88833	89.8115	302.49	1066.99	1.20996	1.20996	11.8804	FALSE	FALSE
DW	M5PFHxA	318.997	5	0.0156741	1	9.70253e+06	6.19015e+08	1.59329	4.36005	4.88018	5.454	0.976037	1.02455	1.2509	FALSE	FALSE	8.45095e+08	6.94859e+08	2.80296e+08	3.6624	4.45425	11.0422	0.89085	1.12252	3.01501	FALSE	FALSE	3.24256e+09	8.42853e+08	2.88121e+08	0.954516	3.67214	10.7423	0.734429	1.3616	11.2541	FALSE	FALSE	9.02686	8.4906	7.94001	2.90946	10.0016	35.5351	2.00033	2.00033	12.2136	FALSE	FALSE
DW	M5PFHxA	318.997	5	0.0156741	2	9.71958e+06	6.20103e+08	1.59329	4.36919	4.89095	5.46662	0.978189	1.0223	1.25117	FALSE	FALSE	8.45095e+08	6.94859e+08	2.80296e+08	3.66884	4.46208	11.0616	0.892416	1.12055	3.01501	FALSE	FALSE	3.24256e+09	8.42853e+08	2.88121e+08	0.956194	3.6786	10.7611	0.73572	1.35921	11.2541	FALSE	FALSE	9.02686	8.4906	7.94001	2.91457	10.0192	35.5976	2.00384	2.00384	12.2136	FALSE	FALSE
DW	M5PFHxA	318.997	5	0.0156741	3	1.04855e+07	6.6897e+08	1.59329	4.84173	5.37624	5.96214	1.07525	1.07525	1.23141	FALSE	FALSE	8.45095e+08	6.94859e+08	2.80296e+08	3.95796	4.81371	11.9333	0.962742	1.0387	3.01501	FALSE	FALSE	3.24256e+09	8.42853e+08	2.88121e+08	1.03155	3.96849	11.6092	0.793697	1.25993	11.2541	FALSE	FALSE	9.02686	8.4906	7.94001	3.14426	10.8088	38.4028	2.16176	2.16176	12.2136	FALSE	FALSE
DW	M5PFHxA	318.997	10	0.0313483	1	1.94395e+07	6.20113e+08	1.59329	9.04197	10.0762	11.2187	1.00762	1.00762	1.24074	FALSE	FALSE	8.45095e+08	6.94859e+08	2.80296e+08	7.3378	8.92431	22.1235	0.892431	1.12053	3.01501	FALSE	FALSE	3.24256e+09	8.42853e+08	2.88121e+08	1.91242	7.35732	21.5226	0.735732	1.35919	11.2541	FALSE	FALSE	9.02686	8.4906	7.94001	5.82925	20.0388	71.1963	2.00388	2.00388	12.2136	FALSE	FALSE
DW	M5PFHxA	318.997	10	0.0313483	2	1.92968e+07	6.15561e+08	1.59329	8.96397	9.99084	11.1253	0.999084	1.00092	1.24111	FALSE	FALSE	8.45095e+08	6.94859e+08	2.80296e+08	7.28392	8.85879	21.9611	0.885879	1.12882	3.01501	FALSE	FALSE	3.24256e+09	8.42853e+08	2.88121e+08	1.89838	7.3033	21.3646	0.73033	1.36924	11.2541	FALSE	FALSE	9.02686	8.4906	7.94001	5.78645	19.8917	70.6736	1.98917	1.98917	12.2136	FALSE	FALSE
DW	M5PFHxA	318.997	10	0.0313483	3	1.9053e+07	6.07784e+08	1.59329	8.83511	9.8451	10.9606	0.98451	1.01573	1.24057	FALSE	FALSE	8.45095e+08	6.94859e+08	2.80296e+08	7.1919	8.74687	21.6836	0.874687	1.14327	3.01501	FALSE	FALSE	3.24256e+09	8.42853e+08	2.88121e+08	1.87439	7.21103	21.0947	0.721103	1.38676	11.2541	FALSE	FALSE	9.02686	8.4906	7.94001	5.71334	19.6403	69.7807	1.96403	1.96403	12.2136	FALSE	FALSE
DW	M5PFHxA	318.997	25	0.0783707	1	4.54625e+07	5.80096e+08	1.59329	21.8376	24.236	26.8916	0.96944	1.03152	1.23143	FALSE	FALSE	8.45095e+08	6.94859e+08	2.80296e+08	17.1607	20.871	51.7395	0.83484	1.19783	3.01501	FALSE	FALSE	3.24256e+09	8.42853e+08	2.88121e+08	4.47252	17.2063	50.3343	0.688253	1.45295	11.2541	FALSE	FALSE	9.02686	8.4906	7.94001	13.6327	46.864	166.505	1.87456	1.87456	12.2136	FALSE	FALSE
DW	M5PFHxA	318.997	25	0.0783707	2	4.68311e+07	5.97559e+08	1.59329	22.5328	25.0404	27.8211	1.00162	1.00162	1.23469	FALSE	FALSE	8.45095e+08	6.94859e+08	2.80296e+08	17.6773	21.4993	53.2971	0.859972	1.16283	3.01501	FALSE	FALSE	3.24256e+09	8.42853e+08	2.88121e+08	4.60715	17.7243	51.8496	0.708972	1.41049	11.2541	FALSE	FALSE	9.02686	8.4906	7.94001	14.0431	48.2748	171.517	1.93099	1.93099	12.2136	FALSE	FALSE
DW	M5PFHxA	318.997	25	0.0783707	3	4.62295e+07	5.89882e+08	1.59329	22.2186	24.6866	27.4225	0.987463	1.0127	1.23421	FALSE	FALSE	8.45095e+08	6.94859e+08	2.80296e+08	17.4502	21.2231	52.6124	0.848924	1.17796	3.01501	FALSE	FALSE	3.24256e+09	8.42853e+08	2.88121e+08	4.54797	17.4966	51.1835	0.699864	1.42885	11.2541	FALSE	FALSE	9.02686	8.4906	7.94001	13.8627	47.6547	169.314	1.90619	1.90619	12.2136	FALSE	FALSE
DW	M5PFHxA	318.997	50	0.156741	1	9.17391e+07	5.8529e+08	1.59329	45.2437	50.2701	55.87	1.0054	1.0054	1.23487	FALSE	FALSE	8.45095e+08	6.94859e+08	2.80296e+08	34.6287	42.1157	104.406	0.842315	1.1872	3.01501	FALSE	FALSE	3.24256e+09	8.42853e+08	2.88121e+08	9.02512	34.7208	101.57	0.694415	1.44006	11.2541	FALSE	FALSE	9.02686	8.4906	7.94001	27.5095	94.5673	335.991	1.89135	1.89135	12.2136	FALSE	FALSE
DW	M5PFHxA	318.997	50	0.156741	2	9.20861e+07	5.87503e+08	1.59329	45.4361	50.4797	56.0987	1.00959	1.00959	1.23467	FALSE	FALSE	8.45095e+08	6.94859e+08	2.80296e+08	34.7596	42.275	104.8	0.8455	1.18273	3.01501	FALSE	FALSE	3.24256e+09	8.42853e+08	2.88121e+08	9.05925	34.8521	101.954	0.697042	1.43463	11.2541	FALSE	FALSE	9.02686	8.4906	7.94001	27.6135	94.925	337.261	1.8985	1.8985	12.2136	FALSE	FALSE
DW	M5PFHxA	318.997	50	0.156741	3	9.17353e+07	5.85266e+08	1.59329	45.2416	50.2678	55.8675	1.00536	1.00536	1.23487	FALSE	FALSE	8.45095e+08	6.94859e+08	2.80296e+08	34.6272	42.114	104.401	0.84228	1.18725	3.01501	FALSE	FALSE	3.24256e+09	8.42853e+08	2.88121e+08	9.02475	34.7193	101.566	0.694387	1.44012	11.2541	FALSE	FALSE	9.02686	8.4906	7.94001	27.5083	94.5634	335.977	1.89127	1.89127	12.2136	FALSE	FALSE
DW	M5PFHxA	318.997	100	0.313483	1	1.77238e+08	5.65385e+08	1.59329	89.2976	99.3685	110.661	0.993685	1.00636	1.23924	FALSE	FALSE	8.45095e+08	6.94859e+08	2.80296e+08	66.902	81.3669	201.71	0.813669	1.229	3.01501	FALSE	FALSE	3.24256e+09	8.42853e+08	2.88121e+08	17.4364	67.0799	196.231	0.670799	1.49076	11.2541	FALSE	FALSE	9.02686	8.4906	7.94001	53.1478	182.702	649.128	1.82702	1.82702	12.2136	FALSE	FALSE
DW	M5PFHxA	318.997	100	0.313483	2	1.77464e+08	5.66106e+08	1.59329	89.4245	99.513	110.826	0.99513	1.00489	1.23932	FALSE	FALSE	8.45095e+08	6.94859e+08	2.80296e+08	66.9872	81.4706	201.967	0.814706	1.22744	3.01501	FALSE	FALSE	3.24256e+09	8.42853e+08	2.88121e+08	17.4586	67.1654	196.482	0.671654	1.48886	11.2541	FALSE	FALSE	9.02686	8.4906	7.94001	53.2156	182.935	649.956	1.82935	1.82935	12.2136	FALSE	FALSE
DW	M5PFHxA	318.997	100	0.313483	3	1.7997e+08	5.74098e+08	1.59329	90.8699	101.118	112.612	1.01118	1.01118	1.23926	FALSE	FALSE	8.45095e+08	6.94859e+08	2.80296e+08	67.933	82.6209	204.818	0.826209	1.21035	3.01501	FALSE	FALSE	3.24256e+09	8.42853e+08	2.88121e+08	17.7051	68.1137	199.256	0.681137	1.46813	11.2541	FALSE	FALSE	9.02686	8.4906	7.94001	53.9669	185.518	659.132	1.85518	1.85518	12.2136	FALSE	FALSE
DW	M5PFHxA	318.997	250	0.783707	1	3.78572e+08	4.83053e+08	1.59329	198.806	212.185	226.58	0.848742	1.17821	1.13971	FALSE	TRUE	8.45095e+08	6.94859e+08	2.80296e+08	142.899	173.795	430.841	0.695181	1.43847	3.01501	FALSE	FALSE	3.24256e+09	8.42853e+08	2.88121e+08	37.2432	143.279	419.14	0.573116	1.74485	11.2541	FALSE	FALSE	9.02686	8.4906	7.94001	113.521	390.242	1386.5	1.56097	1.56097	12.2136	FALSE	FALSE
DW	M5PFHxA	318.997	250	0.783707	2	4.65178e+08	5.93561e+08	1.59329	248.68	275.046	304.616	1.10019	1.10019	1.22493	FALSE	FALSE	8.45095e+08	6.94859e+08	2.80296e+08	175.59	213.555	529.406	0.854219	1.17066	3.01501	FALSE	FALSE	3.24256e+09	8.42853e+08	2.88121e+08	45.7633	176.057	515.027	0.704229	1.41999	11.2541	FALSE	FALSE	9.02686	8.4906	7.94001	139.491	479.519	1703.7	1.91808	1.91808	12.2136	FALSE	FALSE
DW	M5PFHxA	318.997	250	0.783707	3	4.59292e+08	5.8605e+08	1.59329	243.703	270.603	300.904	1.08241	1.08241	1.23472	FALSE	FALSE	8.45095e+08	6.94859e+08	2.80296e+08	173.368	210.852	522.706	0.843409	1.18566	3.01501	FALSE	FALSE	3.24256e+09	8.42853e+08	2.88121e+08	45.1842	173.829	508.51	0.695318	1.43819	11.2541	FALSE	FALSE	9.02686	8.4906	7.94001	137.726	473.451	1682.14	1.8938	1.8938	12.2136	FALSE	FALSE
DW	M3PFBS	302.96	0.932	0.00307631	1	6.53254e+06	2.1235e+09	2.14144	0.652926	0.835676	1.06341	0.896648	1.11526	1.62869	FALSE	FALSE	4.01684e+09	2.70655e+09	3.76468e+08	0.492701	0.731227	5.25702	0.784579	1.27457	10.6698	FALSE	FALSE	3.22825e+09	7.8678e+08	2.85822e+08	0.613057	2.51544	6.92425	2.69898	2.69898	11.2946	FALSE	FALSE	9.20607	8.77813	8.35061	1.23139	3.29866	8.82785	3.53933	3.53933	7.169	TRUE	FALSE
DW	M3PFBS	302.96	0.932	0.00307631	2	6.43529e+06	2.09189e+09	2.14144	0.64166	0.819684	1.04113	0.879489	1.13702	1.62256	FALSE	FALSE	4.01684e+09	2.70655e+09	3.76468e+08	0.485366	0.720342	5.17876	0.772899	1.29383	10.6698	FALSE	FALSE	3.22825e+09	7.8678e+08	2.85822e+08	0.60393	2.478	6.82117	2.6588	2.6588	11.2946	FALSE	FALSE	9.20607	8.77813	8.35061	1.21306	3.24955	8.69644	3.48664	3.48664	7.169	TRUE	FALSE
DW	M3PFBS	302.96	0.932	0.00307631	3	5.84324e+06	1.89943e+09	2.14144	0.57954	0.723237	0.89824	0.776005	1.28865	1.54992	FALSE	TRUE	4.01684e+09	2.70655e+09	3.76468e+08	0.440712	0.654069	4.70231	0.701791	1.42493	10.6698	FALSE	FALSE	3.22825e+09	7.8678e+08	2.85822e+08	0.548368	2.25002	6.19361	2.41418	2.41418	11.2946	FALSE	FALSE	9.20607	8.77813	8.35061	1.10146	2.95059	7.89635	3.16586	3.16586	7.169	TRUE	FALSE
DW	M3PFBS	302.96	4.66	0.0153816	1	4.09003e+07	2.65905e+09	2.14144	4.66945	5.73869	7.04132	1.23148	1.23148	1.50796	TRUE	FALSE	4.01684e+09	2.70655e+09	3.76468e+08	3.08481	4.57822	32.9143	0.982452	1.01786	10.6698	FALSE	FALSE	3.22825e+09	7.8678e+08	2.85822e+08	3.83836	15.7492	43.3528	3.37966	3.37966	11.2946	FALSE	FALSE	9.20607	8.77813	8.35061	7.70977	20.6529	55.2713	4.43196	4.43196	7.169	TRUE	FALSE
DW	M3PFBS	302.96	4.66	0.0153816	2	3.63137e+07	2.36086e+09	2.14144	3.99905	5.02793	6.30766	1.07895	1.07895	1.57729	FALSE	FALSE	4.01684e+09	2.70655e+09	3.76468e+08	2.73887	4.06481	29.2232	0.872278	1.14642	10.6698	FALSE	FALSE	3.22825e+09	7.8678e+08	2.85822e+08	3.40792	13.9831	38.4911	3.00066	3.00066	11.2946	FALSE	FALSE	9.20607	8.77813	8.35061	6.84518	18.3369	49.0731	3.93495	3.93495	7.169	TRUE	FALSE
DW	M3PFBS	302.96	4.66	0.0153816	3	3.60525e+07	2.34388e+09	2.14144	3.96415	4.98762	6.2614	1.0703	1.0703	1.57951	FALSE	FALSE	4.01684e+09	2.70655e+09	3.76468e+08	2.71917	4.03558	29.013	0.866004	1.15473	10.6698	FALSE	FALSE	3.22825e+09	7.8678e+08	2.85822e+08	3.3834	13.8825	38.2143	2.97908	2.97908	11.2946	FALSE	FALSE	9.20607	8.77813	8.35061	6.79594	18.205	48.7201	3.90665	3.90665	7.169	TRUE	FALSE
DW	M3PFBS	302.96	9.32	0.0307631	1	7.02858e+07	2.28474e+09	2.14144	7.89122	9.9029	12.4141	1.06254	1.06254	1.57315	FALSE	FALSE	4.01684e+09	2.70655e+09	3.76468e+08	5.30114	7.86752	56.5621	0.844155	1.18462	10.6698	FALSE	FALSE	3.22825e+09	7.8678e+08	2.85822e+08	6.59608	27.0645	74.5003	2.90392	2.90392	11.2946	FALSE	FALSE	9.20607	8.77813	8.35061	13.249	35.4913	94.9818	3.80808	3.80808	7.169	TRUE	FALSE
DW	M3PFBS	302.96	9.32	0.0307631	2	7.34689e+07	2.38821e+09	2.14144	8.32075	10.3923	12.9671	1.11505	1.11505	1.55841	FALSE	FALSE	4.01684e+09	2.70655e+09	3.76468e+08	5.54121	8.22382	59.1236	0.882384	1.13329	10.6698	FALSE	FALSE	3.22825e+09	7.8678e+08	2.85822e+08	6.8948	28.2902	77.8742	3.03543	3.03543	11.2946	FALSE	FALSE	9.20607	8.77813	8.35061	13.849	37.0986	99.2833	3.98054	3.98054	7.169	TRUE	FALSE
DW	M3PFBS	302.96	9.32	0.0307631	3	6.79827e+07	2.20988e+09	2.14144	7.59544	9.54969	11.993	1.02465	1.02465	1.57898	FALSE	FALSE	4.01684e+09	2.70655e+09	3.76468e+08	5.12743	7.60972	54.7086	0.816493	1.22475	10.6698	FALSE	FALSE	3.22825e+09	7.8678e+08	2.85822e+08	6.37994	26.1777	72.0591	2.80876	2.80876	11.2946	FALSE	FALSE	9.20607	8.77813	8.35061	12.8148	34.3284	91.8695	3.6833	3.6833	7.169	TRUE	FALSE
DW	M3PFBS	302.96	23.3	0.0769078	1	1.61786e+08	2.10363e+09	2.14144	18.5535	23.2991	29.2679	0.999963	1.00004	1.57749	FALSE	FALSE	4.01684e+09	2.70655e+09	3.76468e+08	12.2023	18.1097	130.196	0.777238	1.28661	10.6698	FALSE	FALSE	3.22825e+09	7.8678e+08	2.85822e+08	15.183	62.2978	171.487	2.67372	2.67372	11.2946	FALSE	FALSE	9.20607	8.77813	8.35061	30.4968	81.6948	218.632	3.50622	3.50622	7.169	TRUE	FALSE
DW	M3PFBS	302.96	23.3	0.0769078	2	1.6669e+08	2.1674e+09	2.14144	19.1734	24.0647	30.2147	1.03282	1.03282	1.57587	FALSE	FALSE	4.01684e+09	2.70655e+09	3.76468e+08	12.5722	18.6586	134.143	0.800799	1.24875	10.6698	FALSE	FALSE	3.22825e+09	7.8678e+08	2.85822e+08	15.6433	64.1862	176.685	2.75477	2.75477	11.2946	FALSE	FALSE	9.20607	8.77813	8.35061	31.4213	84.1713	225.259	3.6125	3.6125	7.169	TRUE	FALSE
DW	M3PFBS	302.96	23.3	0.0769078	3	1.62265e+08	2.10986e+09	2.14144	18.613	23.3739	29.3619	1.00317	1.00317	1.57749	FALSE	FALSE	4.01684e+09	2.70655e+09	3.76468e+08	12.2384	18.1633	130.582	0.779541	1.28281	10.6698	FALSE	FALSE	3.22825e+09	7.8678e+08	2.85822e+08	15.228	62.4823	171.995	2.68164	2.68164	11.2946	FALSE	FALSE	9.20607	8.77813	8.35061	30.5871	81.9368	219.279	3.5166	3.5166	7.169	TRUE	FALSE
DW	M3PFBS	302.96	46.6	0.153816	1	3.27461e+08	2.12892e+09	2.14144	38.4306	48.279	60.7432	1.03603	1.03603	1.5806	FALSE	FALSE	4.01684e+09	2.70655e+09	3.76468e+08	24.698	36.6548	263.522	0.786583	1.27132	10.6698	FALSE	FALSE	3.22825e+09	7.8678e+08	2.85822e+08	30.7311	126.093	347.097	2.70587	2.70587	11.2946	FALSE	FALSE	9.20607	8.77813	8.35061	61.7269	165.354	442.52	3.54837	3.54837	7.169	TRUE	FALSE
DW	M3PFBS	302.96	46.6	0.153816	2	3.35203e+08	2.17925e+09	2.14144	39.4752	49.5331	62.2493	1.06294	1.06294	1.57692	FALSE	FALSE	4.01684e+09	2.70655e+09	3.76468e+08	25.2818	37.5213	269.752	0.805178	1.24196	10.6698	FALSE	FALSE	3.22825e+09	7.8678e+08	2.85822e+08	31.4576	129.074	355.302	2.76984	2.76984	11.2946	FALSE	FALSE	9.20607	8.77813	8.35061	63.1861	169.263	452.981	3.63225	3.63225	7.169	TRUE	FALSE
DW	M3PFBS	302.96	46.6	0.153816	3	3.3267e+08	2.16278e+09	2.14144	39.1299	49.1224	61.7611	1.05413	1.05413	1.57836	FALSE	FALSE	4.01684e+09	2.70655e+09	3.76468e+08	25.0908	37.2378	267.714	0.799094	1.25142	10.6698	FALSE	FALSE	3.22825e+09	7.8678e+08	2.85822e+08	31.2199	128.099	352.617	2.74891	2.74891	11.2946	FALSE	FALSE	9.20607	8.77813	8.35061	62.7087	167.984	449.559	3.60481	3.60481	7.169	TRUE	FALSE
DW	M3PFBS	302.96	93.2	0.307631	1	6.32613e+08	2.0564e+09	2.14144	75.4667	95.1115	120.196	1.02051	1.02051	1.59271	FALSE	FALSE	4.01684e+09	2.70655e+09	3.76468e+08	47.7133	70.8123	509.091	0.759788	1.31616	10.6698	FALSE	FALSE	3.22825e+09	7.8678e+08	2.85822e+08	59.3686	243.596	670.546	2.61369	2.61369	11.2946	FALSE	FALSE	9.20607	8.77813	8.35061	119.248	319.443	854.892	3.4275	3.4275	7.169	TRUE	FALSE
DW	M3PFBS	302.96	93.2	0.307631	2	6.14656e+08	1.99803e+09	2.14144	73.0691	92.0703	116.322	0.987879	1.01227	1.59195	FALSE	FALSE	4.01684e+09	2.70655e+09	3.76468e+08	46.3589	68.8022	494.64	0.738221	1.35461	10.6698	FALSE	FALSE	3.22825e+09	7.8678e+08	2.85822e+08	57.6834	236.682	651.512	2.5395	2.5395	11.2946	FALSE	FALSE	9.20607	8.77813	8.35061	115.863	310.375	830.625	3.3302	3.3302	7.169	TRUE	FALSE
DW	M3PFBS	302.96	93.2	0.307631	3	6.21867e+08	2.02147e+09	2.14144	74.0206	93.2896	117.891	1.00096	1.00096	1.59268	FALSE	FALSE	4.01684e+09	2.70655e+09	3.76468e+08	46.9028	69.6094	500.443	0.746882	1.3389	10.6698	FALSE	FALSE	3.22825e+09	7.8678e+08	2.85822e+08	58.3601	239.458	659.155	2.5693	2.5693	11.2946	FALSE	FALSE	9.20607	8.77813	8.35061	117.223	314.016	840.37	3.36927	3.36927	7.169	TRUE	FALSE
DW	M3PFBS	302.96	233	0.769078	1	1.16491e+09	1.51468e+09	2.14144	142.959	170.776	204.468	0.732943	1.36436	1.43026	FALSE	TRUE	4.01684e+09	2.70655e+09	3.76468e+08	87.8603	130.395	937.452	0.559636	1.78688	10.6698	FALSE	FALSE	3.22825e+09	7.8678e+08	2.85822e+08	109.323	448.564	1234.76	1.92517	1.92517	11.2946	FALSE	FALSE	9.20607	8.77813	8.35061	219.587	588.229	1574.22	2.52459	2.52459	7.169	FALSE	FALSE
DW	M3PFBS	302.96	233	0.769078	2	1.52026e+09	1.97673e+09	2.14144	184.776	234.519	299.012	1.00652	1.00652	1.61824	FALSE	FALSE	4.01684e+09	2.70655e+09	3.76468e+08	114.662	170.172	1223.42	0.730351	1.3692	10.6698	FALSE	FALSE	3.22825e+09	7.8678e+08	2.85822e+08	142.671	585.396	1611.42	2.51243	2.51243	11.2946	FALSE	FALSE	9.20607	8.77813	8.35061	286.571	767.665	2054.42	3.2947	3.2947	7.169	TRUE	FALSE
DW	M3PFBS	302.96	233	0.769078	3	1.46315e+09	1.90247e+09	2.14144	176.73	223.952	285.05	0.961166	1.0404	1.61292	FALSE	FALSE	4.01684e+09	2.70655e+09	3.76468e+08	110.354	163.779	1177.46	0.702915	1.42265	10.6698	FALSE	FALSE	3.22825e+09	7.8678e+08	2.85822e+08	137.312	563.405	1550.88	2.41805	2.41805	11.2946	FALSE	FALSE	9.20607	8.77813	8.35061	275.805	738.828	1977.25	3.17093	3.17093	7.169	TRUE	FALSE
DW	M4PFHpA	367.99	5	0.0135873	1	9.83942e+06	7.24163e+08	1.79816	4.28125	4.82404	5.42628	0.964808	1.03648	1.26745	FALSE	FALSE	8.73854e+08	7.99775e+08	5.72005e+08	4.1435	4.52729	6.33004	0.905458	1.10441	1.5277	FALSE	FALSE	3.22276e+09	8.37816e+08	2.88364e+08	1.12351	4.32173	12.5564	0.864346	1.15694	11.176	FALSE	FALSE	9.18642	8.65186	8.11377	2.35713	8.07135	27.8638	1.61427	1.61427	11.8211	FALSE	FALSE
DW	M4PFHpA	367.99	5	0.0135873	2	1.00623e+07	7.40567e+08	1.79816	4.39802	4.96136	5.58713	0.992271	1.00779	1.27038	FALSE	FALSE	8.73854e+08	7.99775e+08	5.72005e+08	4.23736	4.62985	6.47343	0.925969	1.07995	1.5277	FALSE	FALSE	3.22276e+09	8.37816e+08	2.88364e+08	1.14896	4.41963	12.8408	0.883926	1.13132	11.176	FALSE	FALSE	9.18642	8.65186	8.11377	2.41053	8.25419	28.4951	1.65084	1.65084	11.8211	FALSE	FALSE
DW	M4PFHpA	367.99	5	0.0135873	3	1.06902e+07	7.8678e+08	1.79816	4.77596	5.34976	5.98352	1.06995	1.06995	1.25284	FALSE	FALSE	8.73854e+08	7.99775e+08	5.72005e+08	4.50178	4.91876	6.87739	0.983751	1.01652	1.5277	FALSE	FALSE	3.22276e+09	8.37816e+08	2.88364e+08	1.22066	4.69542	13.6421	0.939085	1.06487	11.176	FALSE	FALSE	9.18642	8.65186	8.11377	2.56095	8.76927	30.2732	1.75385	1.75385	11.8211	FALSE	FALSE
DW	M4PFHpA	367.99	10	0.0271746	1	1.92772e+07	7.09383e+08	1.79816	8.65621	9.70674	10.8736	0.970674	1.03021	1.25616	FALSE	FALSE	8.73854e+08	7.99775e+08	5.72005e+08	8.11788	8.86978	12.4017	0.886978	1.12742	1.5277	FALSE	FALSE	3.22276e+09	8.37816e+08	2.88364e+08	2.20117	8.46706	24.6002	0.846706	1.18105	11.176	FALSE	FALSE	9.18642	8.65186	8.11377	4.61805	15.8132	54.5904	1.58132	1.58132	11.8211	FALSE	FALSE
DW	M4PFHpA	367.99	10	0.0271746	2	2.09557e+07	7.71151e+08	1.79816	9.58504	10.6869	11.905	1.06869	1.06869	1.24204	FALSE	FALSE	8.73854e+08	7.99775e+08	5.72005e+08	8.82471	9.64209	13.4815	0.964209	1.03712	1.5277	FALSE	FALSE	3.22276e+09	8.37816e+08	2.88364e+08	2.39282	9.2043	26.7422	0.92043	1.08645	11.176	FALSE	FALSE	9.18642	8.65186	8.11377	5.02016	17.1901	59.3436	1.71901	1.71901	11.8211	FALSE	FALSE
DW	M4PFHpA	367.99	10	0.0271746	3	1.90842e+07	7.0228e+08	1.79816	8.56464	9.59436	10.737	0.959436	1.04228	1.25364	FALSE	FALSE	8.73854e+08	7.99775e+08	5.72005e+08	8.03658	8.78096	12.2775	0.878096	1.13883	1.5277	FALSE	FALSE	3.22276e+09	8.37816e+08	2.88364e+08	2.17912	8.38227	24.3539	0.838227	1.19299	11.176	FALSE	FALSE	9.18642	8.65186	8.11377	4.57181	15.6549	54.0437	1.56549	1.56549	11.8211	FALSE	FALSE
DW	M4PFHpA	367.99	25	0.0679366	1	4.82819e+07	7.10691e+08	1.79816	22.5211	25.1955	28.1808	1.00782	1.00782	1.2513	FALSE	FALSE	8.73854e+08	7.99775e+08	5.72005e+08	20.3321	22.2153	31.0614	0.888613	1.12535	1.5277	FALSE	FALSE	3.22276e+09	8.37816e+08	2.88364e+08	5.51305	21.2067	61.6139	0.848266	1.17888	11.176	FALSE	FALSE	9.18642	8.65186	8.11377	11.5664	39.606	136.727	1.58424	1.58424	11.8211	FALSE	FALSE
DW	M4PFHpA	367.99	25	0.0679366	2	4.64545e+07	6.83792e+08	1.79816	21.6167	24.1488	26.9704	0.965953	1.03525	1.24767	FALSE	FALSE	8.73854e+08	7.99775e+08	5.72005e+08	19.5626	21.3745	29.8858	0.854981	1.16962	1.5277	FALSE	FALSE	3.22276e+09	8.37816e+08	2.88364e+08	5.3044	20.404	59.282	0.816161	1.22525	11.176	FALSE	FALSE	9.18642	8.65186	8.11377	11.1286	38.107	131.553	1.52428	1.52428	11.8211	FALSE	FALSE
DW	M4PFHpA	367.99	25	0.0679366	3	4.64613e+07	6.83893e+08	1.79816	21.6199	24.1527	26.9752	0.966109	1.03508	1.2477	FALSE	FALSE	8.73854e+08	7.99775e+08	5.72005e+08	19.5654	21.3777	29.8902	0.855106	1.16945	1.5277	FALSE	FALSE	3.22276e+09	8.37816e+08	2.88364e+08	5.30517	20.407	59.2907	0.816281	1.22507	11.176	FALSE	FALSE	9.18642	8.65186	8.11377	11.1303	38.1126	131.572	1.5245	1.5245	11.8211	FALSE	FALSE
DW	M4PFHpA	367.99	50	0.135873	1	9.44127e+07	6.94859e+08	1.79816	45.0964	50.4435	56.4422	1.00887	1.00887	1.25159	FALSE	FALSE	8.73854e+08	7.99775e+08	5.72005e+08	39.7583	43.4409	60.7389	0.868818	1.15099	1.5277	FALSE	FALSE	3.22276e+09	8.37816e+08	2.88364e+08	10.7805	41.4685	120.483	0.82937	1.20573	11.176	FALSE	FALSE	9.18642	8.65186	8.11377	22.6175	77.4474	267.363	1.54895	1.54895	11.8211	FALSE	FALSE
DW	M4PFHpA	367.99	50	0.135873	2	9.4984e+07	6.99064e+08	1.79816	45.4063	50.7799	56.8074	1.0156	1.0156	1.25109	FALSE	FALSE	8.73854e+08	7.99775e+08	5.72005e+08	39.9989	43.7038	61.1064	0.874075	1.14407	1.5277	FALSE	FALSE	3.22276e+09	8.37816e+08	2.88364e+08	10.8457	41.7194	121.212	0.834388	1.19848	11.176	FALSE	FALSE	9.18642	8.65186	8.11377	22.7544	77.916	268.981	1.55832	1.55832	11.8211	FALSE	FALSE
DW	M4PFHpA	367.99	50	0.135873	3	9.26509e+07	6.81893e+08	1.79816	44.1765	49.4079	55.2751	0.988157	1.01198	1.25123	FALSE	FALSE	8.73854e+08	7.99775e+08	5.72005e+08	39.0164	42.6303	59.6055	0.852606	1.17288	1.5277	FALSE	FALSE	3.22276e+09	8.37816e+08	2.88364e+08	10.5793	40.6947	118.235	0.813894	1.22866	11.176	FALSE	FALSE	9.18642	8.65186	8.11377	22.1955	76.0022	262.374	1.52004	1.52004	11.8211	FALSE	FALSE
DW	M4PFHpA	367.99	100	0.271746	1	1.86063e+08	6.84694e+08	1.79816	90.9947	101.928	114.278	1.01928	1.01928	1.25587	FALSE	FALSE	8.73854e+08	7.99775e+08	5.72005e+08	78.3534	85.6108	119.701	0.856108	1.16808	1.5277	FALSE	FALSE	3.22276e+09	8.37816e+08	2.88364e+08	21.2456	81.7237	237.44	0.817237	1.22364	11.176	FALSE	FALSE	9.18642	8.65186	8.11377	44.5733	152.629	526.904	1.52629	1.52629	11.8211	FALSE	FALSE
DW	M4PFHpA	367.99	100	0.271746	2	1.85284e+08	6.81827e+08	1.79816	90.5441	101.441	113.752	1.01441	1.01441	1.25631	FALSE	FALSE	8.73854e+08	7.99775e+08	5.72005e+08	78.0253	85.2524	119.2	0.852524	1.17299	1.5277	FALSE	FALSE	3.22276e+09	8.37816e+08	2.88364e+08	21.1566	81.3815	236.446	0.813815	1.22878	11.176	FALSE	FALSE	9.18642	8.65186	8.11377	44.3867	151.99	524.698	1.5199	1.5199	11.8211	FALSE	FALSE
DW	M4PFHpA	367.99	100	0.271746	3	1.86928e+08	6.87876e+08	1.79816	91.5021	102.469	114.854	1.02469	1.02469	1.2552	FALSE	FALSE	8.73854e+08	7.99775e+08	5.72005e+08	78.7176	86.0087	120.257	0.860087	1.16267	1.5277	FALSE	FALSE	3.22276e+09	8.37816e+08	2.88364e+08	21.3443	82.1035	238.544	0.821035	1.21797	11.176	FALSE	FALSE	9.18642	8.65186	8.11377	44.7804	153.338	529.353	1.53338	1.53338	11.8211	FALSE	FALSE
DW	M4PFHpA	367.99	250	0.679366	1	3.88108e+08	5.71279e+08	1.79816	196.38	211.605	228.163	0.846421	1.18145	1.16184	FALSE	TRUE	8.73854e+08	7.99775e+08	5.72005e+08	163.437	178.575	249.683	0.7143	1.39997	1.5277	FALSE	TRUE	3.22276e+09	8.37816e+08	2.88364e+08	44.316	170.467	495.276	0.681868	1.46656	11.176	FALSE	FALSE	9.18642	8.65186	8.11377	92.9751	318.367	1099.07	1.27347	1.27347	11.8211	FALSE	FALSE
DW	M4PFHpA	367.99	250	0.679366	2	4.72542e+08	6.95564e+08	1.79816	242.237	271	303.679	1.084	1.084	1.25365	FALSE	FALSE	8.73854e+08	7.99775e+08	5.72005e+08	198.993	217.425	304.003	0.869699	1.14982	1.5277	FALSE	FALSE	3.22276e+09	8.37816e+08	2.88364e+08	53.9571	207.553	603.025	0.830211	1.20451	11.176	FALSE	FALSE	9.18642	8.65186	8.11377	113.202	387.63	1338.17	1.55052	1.55052	11.8211	FALSE	FALSE
DW	M4PFHpA	367.99	250	0.679366	3	4.65296e+08	6.84898e+08	1.79816	236.711	265.712	298.787	1.06285	1.06285	1.26224	FALSE	FALSE	8.73854e+08	7.99775e+08	5.72005e+08	195.942	214.091	299.341	0.856363	1.16773	1.5277	FALSE	FALSE	3.22276e+09	8.37816e+08	2.88364e+08	53.1297	204.37	593.778	0.81748	1.22327	11.176	FALSE	FALSE	9.18642	8.65186	8.11377	111.466	381.686	1317.65	1.52674	1.52674	11.8211	FALSE	FALSE
DW	M8PFOA	422	5	0.0118483	1	1.0391e+07	8.76999e+08	2.04265	4.57189	5.15256	5.79718	1.03051	1.03051	1.26801	FALSE	FALSE	8.61423e+08	6.94859e+08	5.69306e+08	5.09041	6.31063	7.70235	1.26213	1.26213	1.51311	TRUE	FALSE	3.22472e+09	8.31473e+08	2.85848e+08	1.35981	5.27377	15.3403	1.05475	1.05475	11.2812	FALSE	FALSE	9.341	8.80441	8.26458	1.99971	6.87961	23.8447	1.37592	1.37592	11.9241	FALSE	FALSE
DW	M8PFOA	422	5	0.0118483	2	1.05445e+07	8.89959e+08	2.04265	4.66597	5.2474	5.89174	1.04948	1.04948	1.2627	FALSE	FALSE	8.61423e+08	6.94859e+08	5.69306e+08	5.16563	6.40388	7.81618	1.28078	1.28078	1.51311	TRUE	FALSE	3.22472e+09	8.31473e+08	2.85848e+08	1.3799	5.3517	15.567	1.07034	1.07034	11.2812	FALSE	FALSE	9.341	8.80441	8.26458	2.02926	6.98128	24.197	1.39626	1.39626	11.9241	FALSE	FALSE
DW	M8PFOA	422	5	0.0118483	3	9.52751e+06	8.04123e+08	2.04265	4.12305	4.62185	5.1727	0.92437	1.08182	1.25458	FALSE	FALSE	8.61423e+08	6.94859e+08	5.69306e+08	4.66741	5.78623	7.06231	1.15725	1.15725	1.51311	FALSE	FALSE	3.22472e+09	8.31473e+08	2.85848e+08	1.24681	4.83553	14.0656	0.967106	1.03401	11.2812	FALSE	FALSE	9.341	8.80441	8.26458	1.83354	6.30793	21.8632	1.26159	1.26159	11.9241	FALSE	FALSE
DW	M8PFOA	422	10	0.0236967	1	1.95623e+07	8.25531e+08	2.04265	8.77112	9.84942	11.0488	0.984942	1.01529	1.25968	FALSE	FALSE	8.61423e+08	6.94859e+08	5.69306e+08	9.58334	11.8806	14.5007	1.18806	1.18806	1.51311	FALSE	FALSE	3.22472e+09	8.31473e+08	2.85848e+08	2.56001	9.92854	28.8801	0.992854	1.0072	11.2812	FALSE	FALSE	9.341	8.80441	8.26458	3.7647	12.9517	44.8906	1.29517	1.29517	11.9241	FALSE	FALSE
DW	M8PFOA	422	10	0.0236967	2	2.00259e+07	8.45095e+08	2.04265	9.01255	10.1192	11.3501	1.01192	1.01192	1.25936	FALSE	FALSE	8.61423e+08	6.94859e+08	5.69306e+08	9.81045	12.1621	14.8443	1.21621	1.21621	1.51311	FALSE	FALSE	3.22472e+09	8.31473e+08	2.85848e+08	2.62068	10.1638	29.5645	1.01638	1.01638	11.2812	FALSE	FALSE	9.341	8.80441	8.26458	3.85392	13.2587	45.9545	1.32587	1.32587	11.9241	FALSE	FALSE
DW	M8PFOA	422	10	0.0236967	3	1.99728e+07	8.42853e+08	2.04265	8.98399	10.0882	11.3166	1.00882	1.00882	1.25964	FALSE	FALSE	8.61423e+08	6.94859e+08	5.69306e+08	9.78442	12.1298	14.8049	1.21298	1.21298	1.51311	FALSE	FALSE	3.22472e+09	8.31473e+08	2.85848e+08	2.61372	10.1369	29.486	1.01369	1.01369	11.2812	FALSE	FALSE	9.341	8.80441	8.26458	3.84369	13.2235	45.8326	1.32235	1.32235	11.9241	FALSE	FALSE
DW	M8PFOA	422	25	0.0592416	1	4.78329e+07	8.0742e+08	2.04265	22.2171	24.8734	27.8402	0.994935	1.00509	1.2531	FALSE	FALSE	8.61423e+08	6.94859e+08	5.69306e+08	23.4327	29.0498	35.4563	1.16199	1.16199	1.51311	FALSE	FALSE	3.22472e+09	8.31473e+08	2.85848e+08	6.25961	24.2768	70.6162	0.971072	1.02979	11.2812	FALSE	FALSE	9.341	8.80441	8.26458	9.20527	31.669	109.764	1.26676	1.26676	11.9241	FALSE	FALSE
DW	M8PFOA	422	25	0.0592416	2	4.76059e+07	8.03588e+08	2.04265	22.1033	24.7437	27.6923	0.989746	1.01036	1.25286	FALSE	FALSE	8.61423e+08	6.94859e+08	5.69306e+08	23.3215	28.9119	35.2881	1.15648	1.15648	1.51311	FALSE	FALSE	3.22472e+09	8.31473e+08	2.85848e+08	6.22991	24.1616	70.281	0.966463	1.0347	11.2812	FALSE	FALSE	9.341	8.80441	8.26458	9.16158	31.5187	109.244	1.26075	1.26075	11.9241	FALSE	FALSE
DW	M8PFOA	422	25	0.0592416	3	4.58329e+07	7.7366e+08	2.04265	21.2731	23.7321	26.4683	0.949286	1.05342	1.24422	FALSE	FALSE	8.61423e+08	6.94859e+08	5.69306e+08	22.453	27.8352	33.9738	1.11341	1.11341	1.51311	FALSE	FALSE	3.22472e+09	8.31473e+08	2.85848e+08	5.99789	23.2617	67.6636	0.93047	1.07473	11.2812	FALSE	FALSE	9.341	8.80441	8.26458	8.82038	30.3449	105.175	1.21379	1.21379	11.9241	FALSE	FALSE
DW	M8PFOA	422	50	0.118483	1	9.58221e+07	8.0874e+08	2.04265	45.7026	51.1272	57.2142	1.02254	1.02254	1.25188	FALSE	FALSE	8.61423e+08	6.94859e+08	5.69306e+08	46.9421	58.1945	71.0286	1.16389	1.16389	1.51311	FALSE	FALSE	3.22472e+09	8.31473e+08	2.85848e+08	12.5397	48.633	141.463	0.972659	1.02811	11.2812	FALSE	FALSE	9.341	8.80441	8.26458	18.4406	63.4415	219.888	1.26883	1.26883	11.9241	FALSE	FALSE
DW	M8PFOA	422	50	0.118483	2	9.75563e+07	8.23376e+08	2.04265	46.693	52.1477	58.2586	1.04295	1.04295	1.2477	FALSE	FALSE	8.61423e+08	6.94859e+08	5.69306e+08	47.7916	59.2477	72.314	1.18495	1.18495	1.51311	FALSE	FALSE	3.22472e+09	8.31473e+08	2.85848e+08	12.7666	49.5131	144.023	0.990262	1.00983	11.2812	FALSE	FALSE	9.341	8.80441	8.26458	18.7744	64.5897	223.867	1.29179	1.29179	11.9241	FALSE	FALSE
DW	M8PFOA	422	50	0.118483	3	9.4428e+07	7.96974e+08	2.04265	44.9449	50.3086	56.3301	1.00617	1.00617	1.25332	FALSE	FALSE	8.61423e+08	6.94859e+08	5.69306e+08	46.2591	57.3479	69.9952	1.14696	1.14696	1.51311	FALSE	FALSE	3.22472e+09	8.31473e+08	2.85848e+08	12.3573	47.9254	139.405	0.958508	1.04329	11.2812	FALSE	FALSE	9.341	8.80441	8.26458	18.1723	62.5185	216.689	1.25037	1.25037	11.9241	FALSE	FALSE
DW	M8PFOA	422	100	0.236967	1	1.86052e+08	7.8514e+08	2.04265	90.6251	101.593	113.991	1.01593	1.01593	1.25784	FALSE	FALSE	8.61423e+08	6.94859e+08	5.69306e+08	91.1444	112.993	137.912	1.12993	1.12993	1.51311	FALSE	FALSE	3.22472e+09	8.31473e+08	2.85848e+08	24.3475	94.4275	274.67	0.944275	1.05901	11.2812	FALSE	FALSE	9.341	8.80441	8.26458	35.805	123.18	426.942	1.2318	1.2318	11.9241	FALSE	FALSE
DW	M8PFOA	422	100	0.236967	2	1.84438e+08	7.7833e+08	2.04265	89.7104	100.589	112.888	1.00589	1.00589	1.25836	FALSE	FALSE	8.61423e+08	6.94859e+08	5.69306e+08	90.3539	112.013	136.715	1.12013	1.12013	1.51311	FALSE	FALSE	3.22472e+09	8.31473e+08	2.85848e+08	24.1364	93.6085	272.288	0.936085	1.06828	11.2812	FALSE	FALSE	9.341	8.80441	8.26458	35.4945	122.112	423.239	1.22112	1.22112	11.9241	FALSE	FALSE
DW	M8PFOA	422	100	0.236967	3	1.84419e+08	7.7825e+08	2.04265	89.6999	100.577	112.875	1.00577	1.00577	1.25836	FALSE	FALSE	8.61423e+08	6.94859e+08	5.69306e+08	90.3447	112.001	136.702	1.12001	1.12001	1.51311	FALSE	FALSE	3.22472e+09	8.31473e+08	2.85848e+08	24.1339	93.5989	272.26	0.935989	1.06839	11.2812	FALSE	FALSE	9.341	8.80441	8.26458	35.4908	122.1	423.196	1.221	1.221	11.9241	FALSE	FALSE
DW	M8PFOA	422	250	0.592416	1	3.8623e+08	6.51957e+08	2.04265	195.623	209.542	224.577	0.838167	1.19308	1.14801	FALSE	TRUE	8.61423e+08	6.94859e+08	5.69306e+08	189.209	234.564	286.295	0.938258	1.06581	1.51311	FALSE	FALSE	3.22472e+09	8.31473e+08	2.85848e+08	50.5437	196.025	570.195	0.784099	1.27535	11.2812	FALSE	FALSE	9.341	8.80441	8.26458	74.3286	255.713	886.301	1.02285	1.02285	11.9241	FALSE	FALSE
DW	M8PFOA	422	250	0.592416	2	4.738e+08	7.99775e+08	2.04265	241.879	270.832	303.759	1.08333	1.08333	1.25583	FALSE	FALSE	8.61423e+08	6.94859e+08	5.69306e+08	232.109	287.747	351.206	1.15099	1.15099	1.51311	FALSE	FALSE	3.22472e+09	8.31473e+08	2.85848e+08	62.0035	240.469	699.476	0.961878	1.03963	11.2812	FALSE	FALSE	9.341	8.80441	8.26458	91.1811	313.692	1087.25	1.25477	1.25477	11.9241	FALSE	FALSE
DW	M8PFOA	422	250	0.592416	3	4.66061e+08	7.86711e+08	2.04265	236.031	265.207	298.517	1.06083	1.06083	1.26474	FALSE	FALSE	8.61423e+08	6.94859e+08	5.69306e+08	228.317	283.047	345.469	1.13219	1.13219	1.51311	FALSE	FALSE	3.22472e+09	8.31473e+08	2.85848e+08	60.9907	236.541	688.05	0.946166	1.0569	11.2812	FALSE	FALSE	9.341	8.80441	8.26458	89.6917	308.568	1069.49	1.23427	1.23427	11.9241	FALSE	FALSE
DW	M3PFHxS	402.954	0.474	0.00117631	1	3.90476e+06	3.31949e+09	2.39536	0.402147	0.493528	0.60406	1.0412	1.0412	1.50209	FALSE	FALSE	4.01955e+09	2.1674e+09	3.76358e+08	0.391446	0.725957	4.1807	1.53155	1.53155	10.6801	FALSE	FALSE	3.20226e+09	7.86711e+08	2.85907e+08	0.491352	2.00002	5.50332	4.21945	4.21945	11.2004	TRUE	FALSE	9.50704	8.99093	8.47859	0.489565	1.60663	5.22707	3.38952	3.38952	10.677	TRUE	FALSE
DW	M3PFHxS	402.954	0.474	0.00117631	2	3.59747e+06	3.05826e+09	2.39536	0.3626	0.445099	0.544875	0.939028	1.06493	1.50269	FALSE	FALSE	4.01955e+09	2.1674e+09	3.76358e+08	0.360641	0.668827	3.8517	1.41103	1.41103	10.6801	FALSE	FALSE	3.20226e+09	7.86711e+08	2.85907e+08	0.452685	1.84263	5.07024	3.8874	3.8874	11.2004	FALSE	FALSE	9.50704	8.99093	8.47859	0.451039	1.4802	4.81572	3.12278	3.12278	10.677	FALSE	FALSE
DW	M3PFHxS	402.954	0.474	0.00117631	3	3.13345e+06	2.66379e+09	2.39536	0.312477	0.373419	0.445289	0.787804	1.26935	1.42503	FALSE	TRUE	4.01955e+09	2.1674e+09	3.76358e+08	0.314124	0.582559	3.35488	1.22903	1.22903	10.6801	FALSE	FALSE	3.20226e+09	7.86711e+08	2.85907e+08	0.394295	1.60496	4.41625	3.38598	3.38598	11.2004	FALSE	FALSE	9.50704	8.99093	8.47859	0.392861	1.28928	4.19457	2.71999	2.71999	10.677	FALSE	FALSE
DW	M3PFHxS	402.954	0.948	0.00235263	1	7.08135e+06	3.00998e+09	2.39536	0.758363	0.927301	1.13153	0.978165	1.02232	1.49207	FALSE	FALSE	4.01955e+09	2.1674e+09	3.76358e+08	0.709894	1.31654	7.58177	1.38875	1.38875	10.6801	FALSE	FALSE	3.20226e+09	7.86711e+08	2.85907e+08	0.891075	3.62707	9.98037	3.82602	3.82602	11.2004	FALSE	FALSE	9.50704	8.99093	8.47859	0.887835	2.91366	9.47938	3.07348	3.07348	10.677	FALSE	FALSE
DW	M3PFHxS	402.954	0.948	0.00235263	2	6.80786e+06	2.89373e+09	2.39536	0.724486	0.884313	1.07718	0.932819	1.07202	1.48682	FALSE	FALSE	4.01955e+09	2.1674e+09	3.76358e+08	0.682477	1.26569	7.28895	1.33512	1.33512	10.6801	FALSE	FALSE	3.20226e+09	7.86711e+08	2.85907e+08	0.856661	3.48699	9.59492	3.67826	3.67826	11.2004	FALSE	FALSE	9.50704	8.99093	8.47859	0.853546	2.80113	9.11327	2.95478	2.95478	10.677	FALSE	FALSE
DW	M3PFHxS	402.954	0.948	0.00235263	3	7.02117e+06	2.98439e+09	2.39536	0.750746	0.91782	1.11976	0.968165	1.03288	1.49153	FALSE	FALSE	4.01955e+09	2.1674e+09	3.76358e+08	0.703861	1.30535	7.51733	1.37695	1.37695	10.6801	FALSE	FALSE	3.20226e+09	7.86711e+08	2.85907e+08	0.883502	3.59624	9.89555	3.79351	3.79351	11.2004	FALSE	FALSE	9.50704	8.99093	8.47859	0.880289	2.8889	9.39881	3.04736	3.04736	10.677	FALSE	FALSE
DW	M3PFHxS	402.954	4.74	0.0117631	1	3.60077e+07	3.06107e+09	2.39536	4.45017	5.35851	6.44856	1.13049	1.13049	1.44906	FALSE	FALSE	4.01955e+09	2.1674e+09	3.76358e+08	3.60972	6.6944	38.5523	1.41232	1.41232	10.6801	FALSE	FALSE	3.20226e+09	7.86711e+08	2.85907e+08	4.531	18.4432	50.7488	3.89096	3.89096	11.2004	FALSE	FALSE	9.50704	8.99093	8.47859	4.51452	14.8156	48.2014	3.12565	3.12565	10.677	FALSE	FALSE
DW	M3PFHxS	402.954	4.74	0.0117631	2	3.44651e+07	2.92992e+09	2.39536	4.21236	5.10013	6.17104	1.07598	1.07598	1.46498	FALSE	FALSE	4.01955e+09	2.1674e+09	3.76358e+08	3.45507	6.4076	36.9006	1.35182	1.35182	10.6801	FALSE	FALSE	3.20226e+09	7.86711e+08	2.85907e+08	4.33688	17.653	48.5747	3.72427	3.72427	11.2004	FALSE	FALSE	9.50704	8.99093	8.47859	4.32111	14.1808	46.1363	2.99174	2.99174	10.677	FALSE	FALSE
DW	M3PFHxS	402.954	4.74	0.0117631	3	3.61993e+07	3.07736e+09	2.39536	4.48075	5.39069	6.48176	1.13728	1.13728	1.44658	FALSE	FALSE	4.01955e+09	2.1674e+09	3.76358e+08	3.62892	6.73003	38.7574	1.41984	1.41984	10.6801	FALSE	FALSE	3.20226e+09	7.86711e+08	2.85907e+08	4.55511	18.5413	51.0189	3.91167	3.91167	11.2004	FALSE	FALSE	9.50704	8.99093	8.47859	4.53855	14.8944	48.4579	3.14228	3.14228	10.677	FALSE	FALSE
DW	M3PFHxS	402.954	9.48	0.0235263	1	6.36749e+07	2.70655e+09	2.39536	8.11376	9.83637	11.9227	1.03759	1.03759	1.46945	FALSE	FALSE	4.01955e+09	2.1674e+09	3.76358e+08	6.38331	11.8382	68.1746	1.24875	1.24875	10.6801	FALSE	FALSE	3.20226e+09	7.86711e+08	2.85907e+08	8.01248	32.6143	89.7427	3.44033	3.44033	11.2004	FALSE	FALSE	9.50704	8.99093	8.47859	7.98334	26.1994	85.2378	2.76365	2.76365	10.677	FALSE	FALSE
DW	M3PFHxS	402.954	9.48	0.0235263	2	6.53954e+07	2.77968e+09	2.39536	8.37409	10.1347	12.2637	1.06906	1.06906	1.46448	FALSE	FALSE	4.01955e+09	2.1674e+09	3.76358e+08	6.55578	12.158	70.0167	1.28249	1.28249	10.6801	FALSE	FALSE	3.20226e+09	7.86711e+08	2.85907e+08	8.22897	33.4955	92.1675	3.53329	3.53329	11.2004	FALSE	FALSE	9.50704	8.99093	8.47859	8.19905	26.9073	87.5409	2.83832	2.83832	10.677	FALSE	FALSE
DW	M3PFHxS	402.954	9.48	0.0235263	3	6.41505e+07	2.72676e+09	2.39536	8.1848	9.91874	12.0181	1.04628	1.04628	1.46835	FALSE	FALSE	4.01955e+09	2.1674e+09	3.76358e+08	6.43099	11.9266	68.6838	1.25808	1.25808	10.6801	FALSE	FALSE	3.20226e+09	7.86711e+08	2.85907e+08	8.07233	32.8579	90.413	3.46603	3.46603	11.2004	FALSE	FALSE	9.50704	8.99093	8.47859	8.04297	26.3951	85.8745	2.78429	2.78429	10.677	FALSE	FALSE
DW	M3PFHxS	402.954	23.7	0.0588157	1	1.47463e+08	2.50721e+09	2.39536	19.9624	24.2153	29.3892	1.02174	1.02174	1.47223	FALSE	FALSE	4.01955e+09	2.1674e+09	3.76358e+08	14.783	27.4158	157.884	1.15678	1.15678	10.6801	FALSE	FALSE	3.20226e+09	7.86711e+08	2.85907e+08	18.5559	75.5308	207.833	3.18696	3.18696	11.2004	FALSE	FALSE	9.50704	8.99093	8.47859	18.4885	60.6746	197.4	2.56011	2.56011	10.677	FALSE	FALSE
DW	M3PFHxS	402.954	23.7	0.0588157	2	1.47267e+08	2.50388e+09	2.39536	19.932	24.1791	29.3461	1.02021	1.02021	1.47231	FALSE	FALSE	4.01955e+09	2.1674e+09	3.76358e+08	14.7633	27.3793	157.674	1.15525	1.15525	10.6801	FALSE	FALSE	3.20226e+09	7.86711e+08	2.85907e+08	18.5313	75.4304	207.557	3.18272	3.18272	11.2004	FALSE	FALSE	9.50704	8.99093	8.47859	18.4639	60.5939	197.138	2.55671	2.55671	10.677	FALSE	FALSE
DW	M3PFHxS	402.954	23.7	0.0588157	3	1.41542e+08	2.40653e+09	2.39536	19.0661	23.1239	28.0587	0.975694	1.02491	1.47166	FALSE	FALSE	4.01955e+09	2.1674e+09	3.76358e+08	14.1893	26.3148	151.544	1.11033	1.11033	10.6801	FALSE	FALSE	3.20226e+09	7.86711e+08	2.85907e+08	17.8108	72.4977	199.487	3.05898	3.05898	11.2004	FALSE	FALSE	9.50704	8.99093	8.47859	17.746	58.2381	189.473	2.4573	2.4573	10.677	FALSE	FALSE
DW	M3PFHxS	402.954	47.4	0.117631	1	2.91992e+08	2.48227e+09	2.39536	41.7053	50.5639	61.3689	1.06675	1.06675	1.47149	FALSE	FALSE	4.01955e+09	2.1674e+09	3.76358e+08	29.2717	54.286	312.626	1.14527	1.14527	10.6801	FALSE	FALSE	3.20226e+09	7.86711e+08	2.85907e+08	36.7426	149.559	411.53	3.15524	3.15524	11.2004	FALSE	FALSE	9.50704	8.99093	8.47859	36.609	120.142	390.872	2.53464	2.53464	10.677	FALSE	FALSE
DW	M3PFHxS	402.954	47.4	0.117631	2	2.86993e+08	2.43977e+09	2.39536	40.8469	49.5751	60.2316	1.04589	1.04589	1.47457	FALSE	FALSE	4.01955e+09	2.1674e+09	3.76358e+08	28.7706	53.3565	307.274	1.12566	1.12566	10.6801	FALSE	FALSE	3.20226e+09	7.86711e+08	2.85907e+08	36.1135	146.998	404.484	3.10122	3.10122	11.2004	FALSE	FALSE	9.50704	8.99093	8.47859	35.9822	118.085	384.18	2.49124	2.49124	10.677	FALSE	FALSE
DW	M3PFHxS	402.954	47.4	0.117631	3	2.92724e+08	2.48848e+09	2.39536	41.8326	50.7089	61.5333	1.06981	1.06981	1.47094	FALSE	FALSE	4.01955e+09	2.1674e+09	3.76358e+08	29.3451	54.422	313.41	1.14814	1.14814	10.6801	FALSE	FALSE	3.20226e+09	7.86711e+08	2.85907e+08	36.8346	149.933	412.561	3.16315	3.16315	11.2004	FALSE	FALSE	9.50704	8.99093	8.47859	36.7007	120.443	391.852	2.54099	2.54099	10.677	FALSE	FALSE
DW	M3PFHxS	402.954	94.8	0.235263	1	5.30399e+08	2.2545e+09	2.39536	78.5766	95.6606	116.646	1.00908	1.00908	1.48449	FALSE	FALSE	4.01955e+09	2.1674e+09	3.76358e+08	53.1716	98.6095	567.88	1.04018	1.04018	10.6801	FALSE	FALSE	3.20226e+09	7.86711e+08	2.85907e+08	66.7423	271.67	747.538	2.86572	2.86572	11.2004	FALSE	FALSE	9.50704	8.99093	8.47859	66.4995	218.235	710.013	2.30206	2.30206	10.677	FALSE	FALSE
DW	M3PFHxS	402.954	94.8	0.235263	2	5.31239e+08	2.25807e+09	2.39536	78.7229	95.8383	116.862	1.01095	1.01095	1.48447	FALSE	FALSE	4.01955e+09	2.1674e+09	3.76358e+08	53.2559	98.7658	568.78	1.04183	1.04183	10.6801	FALSE	FALSE	3.20226e+09	7.86711e+08	2.85907e+08	66.8481	272.101	748.722	2.87026	2.87026	11.2004	FALSE	FALSE	9.50704	8.99093	8.47859	66.6049	218.581	711.138	2.30571	2.30571	10.677	FALSE	FALSE
DW	M3PFHxS	402.954	94.8	0.235263	3	5.24002e+08	2.2273e+09	2.39536	77.4738	94.3105	114.989	0.994836	1.00519	1.48423	FALSE	FALSE	4.01955e+09	2.1674e+09	3.76358e+08	52.5303	97.4202	561.031	1.02764	1.02764	10.6801	FALSE	FALSE	3.20226e+09	7.86711e+08	2.85907e+08	65.9373	268.394	738.522	2.83116	2.83116	11.2004	FALSE	FALSE	9.50704	8.99093	8.47859	65.6975	215.603	701.449	2.2743	2.2743	10.677	FALSE	FALSE
DW	M3PFHxS	402.954	237	0.588157	1	9.66082e+08	1.64256e+09	2.39536	151.674	175.408	203.091	0.740117	1.35114	1.339	FALSE	TRUE	4.01955e+09	2.1674e+09	3.76358e+08	96.8481	179.61	1034.35	0.757848	1.31953	10.6801	FALSE	FALSE	3.20226e+09	7.86711e+08	2.85907e+08	121.566	494.827	1361.58	2.08788	2.08788	11.2004	FALSE	FALSE	9.50704	8.99093	8.47859	121.124	397.499	1293.24	1.67721	1.67721	10.677	FALSE	FALSE
DW	M3PFHxS	402.954	237	0.588157	2	1.23097e+09	2.09293e+09	2.39536	192.832	235.846	289.158	0.995132	1.00489	1.49953	FALSE	FALSE	4.01955e+09	2.1674e+09	3.76358e+08	123.403	228.857	1317.96	0.965641	1.03558	10.6801	FALSE	FALSE	3.20226e+09	7.86711e+08	2.85907e+08	154.898	630.504	1734.91	2.66035	2.66035	11.2004	FALSE	FALSE	9.50704	8.99093	8.47859	154.335	506.489	1647.83	2.13709	2.13709	10.677	FALSE	FALSE
DW	M3PFHxS	402.954	237	0.588157	3	1.18298e+09	2.01133e+09	2.39536	183.99	224.58	274.769	0.947596	1.0553	1.49339	FALSE	FALSE	4.01955e+09	2.1674e+09	3.76358e+08	118.592	219.935	1266.58	0.927994	1.07759	10.6801	FALSE	FALSE	3.20226e+09	7.86711e+08	2.85907e+08	148.859	605.923	1667.28	2.55664	2.55664	11.2004	FALSE	FALSE	9.50704	8.99093	8.47859	148.318	486.743	1583.58	2.05377	2.05377	10.677	FALSE	FALSE
DW	M9PFNA	473.001	5	0.0105708	1	8.91508e+06	8.43368e+08	2.04878	4.3224	4.80207	5.3278	0.960414	1.04122	1.2326	FALSE	FALSE	9.03562e+08	7.99775e+08	6.68121e+08	4.66691	5.27253	6.31149	1.05451	1.05451	1.35239	FALSE	FALSE	3.22276e+09	8.03588e+08	2.87993e+08	1.30845	5.24751	14.6422	1.0495	1.0495	11.1904	FALSE	FALSE	9.34884	8.80756	8.2631	1.88863	6.56789	23.0082	1.31358	1.31358	12.1825	FALSE	FALSE
DW	M9PFNA	473.001	5	0.0105708	2	8.84333e+06	8.36581e+08	2.04878	4.28428	4.75389	5.26804	0.950778	1.05177	1.22962	FALSE	FALSE	9.03562e+08	7.99775e+08	6.68121e+08	4.62935	5.2301	6.2607	1.04602	1.04602	1.35239	FALSE	FALSE	3.22276e+09	8.03588e+08	2.87993e+08	1.29792	5.20528	14.5243	1.04106	1.04106	11.1904	FALSE	FALSE	9.34884	8.80756	8.2631	1.87343	6.51503	22.8231	1.30301	1.30301	12.1825	FALSE	FALSE
DW	M9PFNA	473.001	5	0.0105708	3	9.23734e+06	8.73854e+08	2.04878	4.5096	5.01892	5.57813	1.00378	1.00378	1.23694	FALSE	FALSE	9.03562e+08	7.99775e+08	6.68121e+08	4.8356	5.46312	6.53964	1.09262	1.09262	1.35239	FALSE	FALSE	3.22276e+09	8.03588e+08	2.87993e+08	1.35575	5.4372	15.1714	1.08744	1.08744	11.1904	FALSE	FALSE	9.34884	8.80756	8.2631	1.9569	6.8053	23.8399	1.36106	1.36106	12.1825	FALSE	FALSE
DW	M9PFNA	473.001	10	0.0211416	1	1.87755e+07	8.88081e+08	2.04878	9.45593	10.4443	11.5275	1.04443	1.04443	1.21907	FALSE	FALSE	9.03562e+08	7.99775e+08	6.68121e+08	9.82867	11.1041	13.2922	1.11041	1.11041	1.35239	FALSE	FALSE	3.22276e+09	8.03588e+08	2.87993e+08	2.75565	11.0514	30.8369	1.10514	1.10514	11.1904	FALSE	FALSE	9.34884	8.80756	8.2631	3.97752	13.8322	48.4561	1.38322	1.38322	12.1825	FALSE	FALSE
DW	M9PFNA	473.001	10	0.0211416	2	1.83703e+07	8.68915e+08	2.04878	9.19951	10.187	11.2716	1.0187	1.0187	1.22524	FALSE	FALSE	9.03562e+08	7.99775e+08	6.68121e+08	9.61655	10.8645	13.0054	1.08645	1.08645	1.35239	FALSE	FALSE	3.22276e+09	8.03588e+08	2.87993e+08	2.69618	10.8129	30.1714	1.08129	1.08129	11.1904	FALSE	FALSE	9.34884	8.80756	8.2631	3.89168	13.5337	47.4104	1.35337	1.35337	12.1825	FALSE	FALSE
DW	M9PFNA	473.001	10	0.0211416	3	1.81757e+07	8.59711e+08	2.04878	9.083	10.0636	11.1411	1.00636	1.00636	1.22658	FALSE	FALSE	9.03562e+08	7.99775e+08	6.68121e+08	9.51469	10.7494	12.8676	1.07494	1.07494	1.35239	FALSE	FALSE	3.22276e+09	8.03588e+08	2.87993e+08	2.66762	10.6984	29.8518	1.06984	1.06984	11.1904	FALSE	FALSE	9.34884	8.80756	8.2631	3.85046	13.3903	46.9082	1.33903	1.33903	12.1825	FALSE	FALSE
DW	M9PFNA	473.001	25	0.052854	1	4.4041e+07	8.33257e+08	2.04878	22.6023	24.9765	27.5947	0.999059	1.00094	1.22088	FALSE	FALSE	9.03562e+08	7.99775e+08	6.68121e+08	23.0548	26.0466	31.1791	1.04186	1.04186	1.35239	FALSE	FALSE	3.22276e+09	8.03588e+08	2.87993e+08	6.46384	25.923	72.3331	1.03692	1.03692	11.1904	FALSE	FALSE	9.34884	8.80756	8.2631	9.32994	32.4457	113.662	1.29783	1.29783	12.1825	FALSE	FALSE
DW	M9PFNA	473.001	25	0.052854	2	4.42819e+07	8.37816e+08	2.04878	22.7385	25.1257	27.7582	1.00503	1.00503	1.22076	FALSE	FALSE	9.03562e+08	7.99775e+08	6.68121e+08	23.1809	26.1891	31.3497	1.04756	1.04756	1.35239	FALSE	FALSE	3.22276e+09	8.03588e+08	2.87993e+08	6.4992	26.0648	72.7288	1.04259	1.04259	11.1904	FALSE	FALSE	9.34884	8.80756	8.2631	9.38098	32.6232	114.284	1.30493	1.30493	12.1825	FALSE	FALSE
DW	M9PFNA	473.001	25	0.052854	3	4.39467e+07	8.31473e+08	2.04878	22.5497	24.9181	27.5299	0.996724	1.00329	1.22085	FALSE	FALSE	9.03562e+08	7.99775e+08	6.68121e+08	23.0054	25.9908	31.1124	1.03963	1.03963	1.35239	FALSE	FALSE	3.22276e+09	8.03588e+08	2.87993e+08	6.45	25.8675	72.1783	1.0347	1.0347	11.1904	FALSE	FALSE	9.34884	8.80756	8.2631	9.30996	32.3763	113.419	1.29505	1.29505	12.1825	FALSE	FALSE
DW	M9PFNA	473.001	50	0.105708	1	8.78999e+07	8.31534e+08	2.04878	46.0652	50.8758	56.2029	1.01752	1.01752	1.22007	FALSE	FALSE	9.03562e+08	7.99775e+08	6.68121e+08	46.0142	51.9855	62.2294	1.03971	1.03971	1.35239	FALSE	FALSE	3.22276e+09	8.03588e+08	2.87993e+08	12.901	51.7388	144.367	1.03478	1.03478	11.1904	FALSE	FALSE	9.34884	8.80756	8.2631	18.6213	64.7573	226.854	1.29515	1.29515	12.1825	FALSE	FALSE
DW	M9PFNA	473.001	50	0.105708	2	8.94535e+07	8.46231e+08	2.04878	47.0294	51.8608	57.2029	1.03722	1.03722	1.21632	FALSE	FALSE	9.03562e+08	7.99775e+08	6.68121e+08	46.8275	52.9043	63.3292	1.05809	1.05809	1.35239	FALSE	FALSE	3.22276e+09	8.03588e+08	2.87993e+08	13.129	52.6533	146.919	1.05307	1.05307	11.1904	FALSE	FALSE	9.34884	8.80756	8.2631	18.9504	65.9018	230.863	1.31804	1.31804	12.1825	FALSE	FALSE
DW	M9PFNA	473.001	50	0.105708	3	8.4897e+07	8.03126e+08	2.04878	44.3588	48.978	54.0904	0.97956	1.02087	1.21938	FALSE	FALSE	9.03562e+08	7.99775e+08	6.68121e+08	44.4422	50.2095	60.1034	1.00419	1.00419	1.35239	FALSE	FALSE	3.22276e+09	8.03588e+08	2.87993e+08	12.4602	49.9713	139.435	0.999425	1.00057	11.1904	FALSE	FALSE	9.34884	8.80756	8.2631	17.9851	62.545	219.104	1.2509	1.2509	12.1825	FALSE	FALSE
DW	M9PFNA	473.001	100	0.211416	1	1.72481e+08	8.15835e+08	2.04878	92.0147	101.785	112.673	1.01785	1.01785	1.22451	FALSE	FALSE	9.03562e+08	7.99775e+08	6.68121e+08	90.291	102.008	122.109	1.02008	1.02008	1.35239	FALSE	FALSE	3.22276e+09	8.03588e+08	2.87993e+08	25.3148	101.524	283.283	1.01524	1.01524	11.1904	FALSE	FALSE	9.34884	8.80756	8.2631	36.5395	127.069	445.142	1.27069	1.27069	12.1825	FALSE	FALSE
DW	M9PFNA	473.001	100	0.211416	2	1.71605e+08	8.11694e+08	2.04878	91.4658	101.2	112.049	1.012	1.012	1.22504	FALSE	FALSE	9.03562e+08	7.99775e+08	6.68121e+08	89.8327	101.49	121.489	1.0149	1.0149	1.35239	FALSE	FALSE	3.22276e+09	8.03588e+08	2.87993e+08	25.1863	101.009	281.845	1.01009	1.01009	11.1904	FALSE	FALSE	9.34884	8.80756	8.2631	36.354	126.424	442.882	1.26424	1.26424	12.1825	FALSE	FALSE
DW	M9PFNA	473.001	100	0.211416	3	1.71106e+08	8.09331e+08	2.04878	91.1569	100.866	111.688	1.00866	1.00866	1.22523	FALSE	FALSE	9.03562e+08	7.99775e+08	6.68121e+08	89.5711	101.195	121.135	1.01195	1.01195	1.35239	FALSE	FALSE	3.22276e+09	8.03588e+08	2.87993e+08	25.1129	100.715	281.025	1.00715	1.00715	11.1904	FALSE	FALSE	9.34884	8.80756	8.2631	36.2481	126.056	441.593	1.26056	1.26056	12.1825	FALSE	FALSE
DW	M9PFNA	473.001	250	0.52854	1	3.60777e+08	6.82591e+08	2.04878	200.884	210.679	221.012	0.842717	1.18664	1.1002	FALSE	TRUE	9.03562e+08	7.99775e+08	6.68121e+08	188.861	213.37	255.415	0.853479	1.17168	1.35239	FALSE	FALSE	3.22276e+09	8.03588e+08	2.87993e+08	52.9508	212.357	592.542	0.849429	1.17726	11.1904	FALSE	FALSE	9.34884	8.80756	8.2631	76.4294	265.79	931.101	1.06316	1.06316	12.1825	FALSE	FALSE
DW	M9PFNA	473.001	250	0.52854	2	4.36149e+08	8.25196e+08	2.04878	241.259	266.893	295.642	1.06757	1.06757	1.22541	FALSE	FALSE	9.03562e+08	7.99775e+08	6.68121e+08	228.317	257.946	308.775	1.03178	1.03178	1.35239	FALSE	FALSE	3.22276e+09	8.03588e+08	2.87993e+08	64.013	256.722	716.333	1.02689	1.02689	11.1904	FALSE	FALSE	9.34884	8.80756	8.2631	92.3967	321.318	1125.62	1.28527	1.28527	12.1825	FALSE	FALSE
DW	M9PFNA	473.001	250	0.52854	3	4.27278e+08	8.0841e+08	2.04878	234.228	260.053	289.133	1.04021	1.04021	1.23441	FALSE	FALSE	9.03562e+08	7.99775e+08	6.68121e+08	223.673	252.699	302.494	1.0108	1.0108	1.35239	FALSE	FALSE	3.22276e+09	8.03588e+08	2.87993e+08	62.711	251.5	701.762	1.006	1.006	11.1904	FALSE	FALSE	9.34884	8.80756	8.2631	90.5173	314.783	1102.73	1.25913	1.25913	12.1825	FALSE	FALSE
DW	M6PFDA	519.987	5	0.00961562	1	9.17974e+06	9.5467e+08	2.29362	4.67583	5.24445	5.87313	1.04889	1.04889	1.25606	FALSE	FALSE	9.91378e+08	8.42853e+08	7.34063e+08	4.81486	5.66333	6.50264	1.13267	1.13267	1.35054	FALSE	FALSE	3.22378e+09	8.03126e+08	2.87147e+08	1.48067	5.94346	16.6234	1.18869	1.18869	11.227	FALSE	FALSE	9.50043	8.95725	8.41585	1.50796	5.26716	18.3221	1.05343	1.05343	12.1503	FALSE	FALSE
DW	M6PFDA	519.987	5	0.00961562	2	8.61713e+06	8.9616e+08	2.29362	4.31121	4.84975	5.44644	0.96995	1.03098	1.26332	FALSE	FALSE	9.91378e+08	8.42853e+08	7.34063e+08	4.51977	5.31623	6.10411	1.06325	1.06325	1.35054	FALSE	FALSE	3.22378e+09	8.03126e+08	2.87147e+08	1.38992	5.5792	15.6046	1.11584	1.11584	11.227	FALSE	FALSE	9.50043	8.95725	8.41585	1.41554	4.94434	17.1992	0.988868	1.01126	12.1503	FALSE	FALSE
DW	M6PFDA	519.987	5	0.00961562	3	8.81922e+06	9.17176e+08	2.29362	4.4335	4.99127	5.60978	0.998254	1.00175	1.26532	FALSE	FALSE	9.91378e+08	8.42853e+08	7.34063e+08	4.62576	5.44091	6.24726	1.08818	1.08818	1.35054	FALSE	FALSE	3.22378e+09	8.03126e+08	2.87147e+08	1.42252	5.71004	15.9705	1.14201	1.14201	11.227	FALSE	FALSE	9.50043	8.95725	8.41585	1.44874	5.06029	17.6025	1.01206	1.01206	12.1503	FALSE	FALSE
DW	M6PFDA	519.987	10	0.0192312	1	1.66799e+07	8.67335e+08	2.29362	8.54848	9.55285	10.6648	0.955285	1.04681	1.24757	FALSE	FALSE	9.91378e+08	8.42853e+08	7.34063e+08	8.74878	10.2905	11.8155	1.02905	1.02905	1.35054	FALSE	FALSE	3.22378e+09	8.03126e+08	2.87147e+08	2.69043	10.7995	30.2053	1.07995	1.07995	11.227	FALSE	FALSE	9.50043	8.95725	8.41585	2.74002	9.57061	33.292	0.957061	1.04487	12.1503	FALSE	FALSE
DW	M6PFDA	519.987	10	0.0192312	2	1.74822e+07	9.09054e+08	2.29362	9.00037	10.0808	11.2799	1.00808	1.00808	1.25327	FALSE	FALSE	9.91378e+08	8.42853e+08	7.34063e+08	9.1696	10.7854	12.3839	1.07854	1.07854	1.35054	FALSE	FALSE	3.22378e+09	8.03126e+08	2.87147e+08	2.81984	11.3189	31.6582	1.13189	1.13189	11.227	FALSE	FALSE	9.50043	8.95725	8.41585	2.87181	10.031	34.8933	1.0031	1.0031	12.1503	FALSE	FALSE
DW	M6PFDA	519.987	10	0.0192312	3	1.6894e+07	8.78465e+08	2.29362	8.66216	9.69357	10.837	0.969357	1.03161	1.25108	FALSE	FALSE	9.91378e+08	8.42853e+08	7.34063e+08	8.86105	10.4225	11.9672	1.04225	1.04225	1.35054	FALSE	FALSE	3.22378e+09	8.03126e+08	2.87147e+08	2.72495	10.9381	30.5929	1.09381	1.09381	11.227	FALSE	FALSE	9.50043	8.95725	8.41585	2.77518	9.69343	33.7192	0.969343	1.03163	12.1503	FALSE	FALSE
DW	M6PFDA	519.987	25	0.0480781	1	4.18671e+07	8.70815e+08	2.29362	22.0761	24.6484	27.5135	0.985934	1.01427	1.2463	FALSE	FALSE	9.91378e+08	8.42853e+08	7.34063e+08	21.9597	25.8294	29.6573	1.03318	1.03318	1.35054	FALSE	FALSE	3.22378e+09	8.03126e+08	2.87147e+08	6.75305	27.107	75.8162	1.08428	1.08428	11.227	FALSE	FALSE	9.50043	8.95725	8.41585	6.87753	24.0225	83.5638	0.960901	1.04069	12.1503	FALSE	FALSE
DW	M6PFDA	519.987	25	0.0480781	2	4.26415e+07	8.86922e+08	2.29362	22.5174	25.1455	28.0739	1.00582	1.00582	1.24677	FALSE	FALSE	9.91378e+08	8.42853e+08	7.34063e+08	22.3659	26.3071	30.2059	1.05229	1.05229	1.35054	FALSE	FALSE	3.22378e+09	8.03126e+08	2.87147e+08	6.87796	27.6084	77.2186	1.10434	1.10434	11.227	FALSE	FALSE	9.50043	8.95725	8.41585	7.00475	24.4669	85.1095	0.978674	1.02179	12.1503	FALSE	FALSE
DW	M6PFDA	519.987	25	0.0480781	3	4.19973e+07	8.73522e+08	2.29362	22.1485	24.7319	27.6098	0.989275	1.01084	1.24657	FALSE	FALSE	9.91378e+08	8.42853e+08	7.34063e+08	22.028	25.9097	29.7495	1.03639	1.03639	1.35054	FALSE	FALSE	3.22378e+09	8.03126e+08	2.87147e+08	6.77404	27.1913	76.0519	1.08765	1.08765	11.227	FALSE	FALSE	9.50043	8.95725	8.41585	6.89891	24.0972	83.8236	0.963888	1.03747	12.1503	FALSE	FALSE
DW	M6PFDA	519.987	50	0.0961562	1	8.59506e+07	8.93864e+08	2.29362	46.3609	51.6915	57.653	1.03383	1.03383	1.24357	FALSE	FALSE	9.91378e+08	8.42853e+08	7.34063e+08	45.0819	53.0261	60.8847	1.06052	1.06052	1.35054	FALSE	FALSE	3.22378e+09	8.03126e+08	2.87147e+08	13.8636	55.649	155.646	1.11298	1.11298	11.227	FALSE	FALSE	9.50043	8.95725	8.41585	14.1191	49.3167	171.551	0.986335	1.01385	12.1503	FALSE	FALSE
DW	M6PFDA	519.987	50	0.0961562	2	8.62222e+07	8.9669e+08	2.29362	46.5362	51.87	57.8332	1.0374	1.0374	1.24276	FALSE	FALSE	9.91378e+08	8.42853e+08	7.34063e+08	45.2244	53.1937	61.0771	1.06387	1.06387	1.35054	FALSE	FALSE	3.22378e+09	8.03126e+08	2.87147e+08	13.9074	55.8249	156.138	1.1165	1.1165	11.227	FALSE	FALSE	9.50043	8.95725	8.41585	14.1638	49.4726	172.094	0.989452	1.01066	12.1503	FALSE	FALSE
DW	M6PFDA	519.987	50	0.0961562	3	8.47754e+07	8.81643e+08	2.29362	45.622	50.9202	56.8511	1.0184	1.0184	1.24613	FALSE	FALSE	9.91378e+08	8.42853e+08	7.34063e+08	44.4655	52.3011	60.0522	1.04602	1.04602	1.35054	FALSE	FALSE	3.22378e+09	8.03126e+08	2.87147e+08	13.674	54.8882	153.518	1.09776	1.09776	11.227	FALSE	FALSE	9.50043	8.95725	8.41585	13.9261	48.6425	169.206	0.972849	1.02791	12.1503	FALSE	FALSE
DW	M6PFDA	519.987	100	0.192312	1	1.66346e+08	8.64977e+08	2.29362	90.9604	101.707	113.821	1.01707	1.01707	1.25133	FALSE	FALSE	9.91378e+08	8.42853e+08	7.34063e+08	87.25	102.625	117.834	1.02625	1.02625	1.35054	FALSE	FALSE	3.22378e+09	8.03126e+08	2.87147e+08	26.8311	107.701	301.232	1.07701	1.07701	11.227	FALSE	FALSE	9.50043	8.95725	8.41585	27.3257	95.4459	332.015	0.954459	1.04771	12.1503	FALSE	FALSE
DW	M6PFDA	519.987	100	0.192312	2	1.67051e+08	8.68645e+08	2.29362	91.4164	102.195	114.343	1.02195	1.02195	1.25079	FALSE	FALSE	9.91378e+08	8.42853e+08	7.34063e+08	87.62	103.06	118.334	1.0306	1.0306	1.35054	FALSE	FALSE	3.22378e+09	8.03126e+08	2.87147e+08	26.9449	108.158	302.509	1.08158	1.08158	11.227	FALSE	FALSE	9.50043	8.95725	8.41585	27.4416	95.8507	333.423	0.958507	1.04329	12.1503	FALSE	FALSE
DW	M6PFDA	519.987	100	0.192312	3	1.68038e+08	8.73775e+08	2.29362	92.0645	102.878	115.061	1.02878	1.02878	1.24979	FALSE	FALSE	9.91378e+08	8.42853e+08	7.34063e+08	88.1374	103.669	119.033	1.03669	1.03669	1.35054	FALSE	FALSE	3.22378e+09	8.03126e+08	2.87147e+08	27.104	108.797	304.296	1.08797	1.08797	11.227	FALSE	FALSE	9.50043	8.95725	8.41585	27.6036	96.4167	335.392	0.964167	1.03716	12.1503	FALSE	FALSE
DW	M6PFDA	519.987	250	0.480781	1	3.42803e+08	7.13013e+08	2.29362	196.435	206.3	216.722	0.825201	1.21183	1.10327	FALSE	TRUE	9.91378e+08	8.42853e+08	7.34063e+08	179.804	211.488	242.831	0.845953	1.1821	1.35054	FALSE	TRUE	3.22378e+09	8.03126e+08	2.87147e+08	55.2932	221.949	620.775	0.887797	1.12638	11.227	FALSE	FALSE	9.50043	8.95725	8.41585	56.3125	196.694	684.211	0.786775	1.27101	12.1503	FALSE	FALSE
DW	M6PFDA	519.987	250	0.480781	2	4.21744e+08	8.77206e+08	2.29362	238.394	266.873	299.253	1.06749	1.06749	1.25529	FALSE	FALSE	9.91378e+08	8.42853e+08	7.34063e+08	221.209	260.189	298.75	1.04076	1.04076	1.35054	FALSE	FALSE	3.22378e+09	8.03126e+08	2.87147e+08	68.0261	273.06	763.726	1.09224	1.09224	11.227	FALSE	FALSE	9.50043	8.95725	8.41585	69.2801	241.988	841.771	0.967953	1.03311	12.1503	FALSE	FALSE
DW	M6PFDA	519.987	250	0.480781	3	4.11884e+08	8.56699e+08	2.29362	230.588	259.035	291.5	1.03614	1.03614	1.26416	FALSE	FALSE	9.91378e+08	8.42853e+08	7.34063e+08	216.037	254.107	291.766	1.01643	1.01643	1.35054	FALSE	FALSE	3.22378e+09	8.03126e+08	2.87147e+08	66.4358	266.676	745.872	1.0667	1.0667	11.227	FALSE	FALSE	9.50043	8.95725	8.41585	67.6605	236.331	822.092	0.945324	1.05784	12.1503	FALSE	FALSE
DW	M8PFOS	507.964	0.4795	0.000943964	1	5.24481e+06	5.55615e+09	2.47938	0.523409	0.620246	0.73372	1.29353	1.29353	1.40181	TRUE	FALSE	3.03653e+09	2.1235e+09	5.8862e+08	0.877374	1.25462	4.52614	2.61651	2.61651	5.15873	TRUE	FALSE	2.89158e+09	7.86711e+08	2.85949e+08	0.921358	3.38647	9.31695	7.06251	7.06251	10.1122	TRUE	FALSE	9.52479	9.01933	8.51793	0.795741	2.54819	8.08417	5.31426	5.31426	10.1593	TRUE	FALSE
DW	M8PFOS	507.964	0.4795	0.000943964	2	4.46116e+06	4.72598e+09	2.47938	0.410616	0.50532	0.620169	1.05385	1.05385	1.51034	FALSE	FALSE	3.03653e+09	2.1235e+09	5.8862e+08	0.746281	1.06716	3.84986	2.22556	2.22556	5.15873	TRUE	FALSE	2.89158e+09	7.86711e+08	2.85949e+08	0.783693	2.88048	7.92485	6.00726	6.00726	10.1122	TRUE	FALSE	9.52479	9.01933	8.51793	0.676845	2.16745	6.87627	4.52023	4.52023	10.1593	TRUE	FALSE
DW	M8PFOS	507.964	0.4795	0.000943964	3	3.69734e+06	3.91682e+09	2.47938	0.327101	0.396988	0.480599	0.827921	1.20784	1.46927	FALSE	FALSE	3.03653e+09	2.1235e+09	5.8862e+08	0.618507	0.884444	3.19071	1.84451	1.84451	5.15873	TRUE	FALSE	2.89158e+09	7.86711e+08	2.85949e+08	0.649513	2.3873	6.568	4.97873	4.97873	10.1122	TRUE	FALSE	9.52479	9.01933	8.51793	0.560959	1.79635	5.69895	3.7463	3.7463	10.1593	TRUE	FALSE
DW	M8PFOS	507.964	0.959	0.00188793	1	7.60161e+06	4.02643e+09	2.47938	0.726368	0.889354	1.0866	0.927376	1.07831	1.49593	FALSE	FALSE	3.03653e+09	2.1235e+09	5.8862e+08	1.27163	1.81839	6.55999	1.89613	1.89613	5.15873	TRUE	FALSE	2.89158e+09	7.86711e+08	2.85949e+08	1.33538	4.90821	13.5036	5.11805	5.11805	10.1122	TRUE	FALSE	9.52479	9.01933	8.51793	1.15331	3.69324	11.7169	3.85114	3.85114	10.1593	TRUE	FALSE
DW	M8PFOS	507.964	0.959	0.00188793	2	7.56137e+06	4.00512e+09	2.47938	0.721988	0.883584	1.07906	0.92136	1.08535	1.49456	FALSE	FALSE	3.03653e+09	2.1235e+09	5.8862e+08	1.2649	1.80876	6.52527	1.88609	1.88609	5.15873	TRUE	FALSE	2.89158e+09	7.86711e+08	2.85949e+08	1.32831	4.88223	13.4321	5.09096	5.09096	10.1122	TRUE	FALSE	9.52479	9.01933	8.51793	1.14721	3.67369	11.6548	3.83075	3.83075	10.1593	TRUE	FALSE
DW	M8PFOS	507.964	0.959	0.00188793	3	7.31247e+06	3.87328e+09	2.47938	0.695678	0.848006	1.03156	0.884261	1.13089	1.48281	FALSE	FALSE	3.03653e+09	2.1235e+09	5.8862e+08	1.22326	1.74922	6.31047	1.82401	1.82401	5.15873	TRUE	FALSE	2.89158e+09	7.86711e+08	2.85949e+08	1.28458	4.72152	12.99	4.92338	4.92338	10.1122	TRUE	FALSE	9.52479	9.01933	8.51793	1.10944	3.55276	11.2712	3.70465	3.70465	10.1593	TRUE	FALSE
DW	M8PFOS	507.964	4.795	0.00943964	1	3.78638e+07	4.01115e+09	2.47938	4.27009	5.18507	6.29198	1.08135	1.08135	1.4735	FALSE	FALSE	3.03653e+09	2.1235e+09	5.8862e+08	6.33402	9.05744	32.6755	1.88894	1.88894	5.15873	TRUE	FALSE	2.89158e+09	7.86711e+08	2.85949e+08	6.65155	24.4479	67.2618	5.09863	5.09863	10.1122	TRUE	FALSE	9.52479	9.01933	8.51793	5.74469	18.3961	58.362	3.83652	3.83652	10.1593	TRUE	FALSE
DW	M8PFOS	507.964	4.795	0.00943964	2	3.55961e+07	3.77092e+09	2.47938	3.96401	4.83025	5.88145	1.00735	1.00735	1.48371	FALSE	FALSE	3.03653e+09	2.1235e+09	5.8862e+08	5.95467	8.51499	30.7185	1.77581	1.77581	5.15873	TRUE	FALSE	2.89158e+09	7.86711e+08	2.85949e+08	6.25319	22.9837	63.2334	4.79327	4.79327	10.1122	TRUE	FALSE	9.52479	9.01933	8.51793	5.40063	17.2944	54.8667	3.60675	3.60675	10.1593	TRUE	FALSE
DW	M8PFOS	507.964	4.795	0.00943964	3	3.75673e+07	3.97974e+09	2.47938	4.22861	5.13853	6.24005	1.07164	1.07164	1.47567	FALSE	FALSE	3.03653e+09	2.1235e+09	5.8862e+08	6.28442	8.98652	32.4196	1.87414	1.87414	5.15873	TRUE	FALSE	2.89158e+09	7.86711e+08	2.85949e+08	6.59947	24.2565	66.7351	5.05871	5.05871	10.1122	TRUE	FALSE	9.52479	9.01933	8.51793	5.6997	18.2521	57.905	3.80648	3.80648	10.1593	TRUE	FALSE
DW	M8PFOS	507.964	9.59	0.0188793	1	6.49715e+07	3.44142e+09	2.47938	7.63898	9.29386	11.3048	0.96912	1.03186	1.47988	FALSE	FALSE	3.03653e+09	2.1235e+09	5.8862e+08	10.8687	15.5419	56.0687	1.62064	1.62064	5.15873	TRUE	FALSE	2.89158e+09	7.86711e+08	2.85949e+08	11.4136	41.9508	115.416	4.37444	4.37444	10.1122	TRUE	FALSE	9.52479	9.01933	8.51793	9.85745	31.5664	100.145	3.29159	3.29159	10.1593	TRUE	FALSE
DW	M8PFOS	507.964	9.59	0.0188793	2	6.64826e+07	3.52146e+09	2.47938	7.83797	9.5404	11.6103	0.994828	1.0052	1.48129	FALSE	FALSE	3.03653e+09	2.1235e+09	5.8862e+08	11.1215	15.9034	57.3727	1.65833	1.65833	5.15873	TRUE	FALSE	2.89158e+09	7.86711e+08	2.85949e+08	11.679	42.9265	118.1	4.47617	4.47617	10.1122	TRUE	FALSE	9.52479	9.01933	8.51793	10.0867	32.3005	102.474	3.36815	3.36815	10.1593	TRUE	FALSE
DW	M8PFOS	507.964	9.59	0.0188793	3	6.93127e+07	3.67137e+09	2.47938	8.22712	10.0042	12.163	1.04319	1.04319	1.47841	FALSE	FALSE	3.03653e+09	2.1235e+09	5.8862e+08	11.5949	16.5804	59.8151	1.72892	1.72892	5.15873	TRUE	FALSE	2.89158e+09	7.86711e+08	2.85949e+08	12.1762	44.7539	123.128	4.66673	4.66673	10.1122	TRUE	FALSE	9.52479	9.01933	8.51793	10.5161	33.6756	106.836	3.51153	3.51153	10.1593	TRUE	FALSE
DW	M8PFOS	507.964	23.975	0.0471982	1	1.49704e+08	3.17181e+09	2.47938	18.9809	23.0852	28.0904	0.962886	1.03854	1.47993	FALSE	FALSE	3.03653e+09	2.1235e+09	5.8862e+08	25.0431	35.8108	129.191	1.49367	1.49367	5.15873	TRUE	FALSE	2.89158e+09	7.86711e+08	2.85949e+08	26.2985	96.6609	265.936	4.03174	4.03174	10.1122	TRUE	FALSE	9.52479	9.01933	8.51793	22.713	72.7335	230.748	3.03372	3.03372	10.1593	FALSE	FALSE
DW	M8PFOS	507.964	23.975	0.0471982	2	1.52278e+08	3.22636e+09	2.47938	19.3425	23.5394	28.6612	0.981831	1.01851	1.48178	FALSE	FALSE	3.03653e+09	2.1235e+09	5.8862e+08	25.4738	36.4267	131.412	1.51936	1.51936	5.15873	TRUE	FALSE	2.89158e+09	7.86711e+08	2.85949e+08	26.7508	98.3232	270.509	4.10107	4.10107	10.1122	TRUE	FALSE	9.52479	9.01933	8.51793	23.1036	73.9844	234.717	3.0859	3.0859	10.1593	FALSE	FALSE
DW	M8PFOS	507.964	23.975	0.0471982	3	1.52475e+08	3.23052e+09	2.47938	19.3704	23.5741	28.7044	0.98328	1.017	1.48187	FALSE	FALSE	3.03653e+09	2.1235e+09	5.8862e+08	25.5067	36.4737	131.582	1.52132	1.52132	5.15873	TRUE	FALSE	2.89158e+09	7.86711e+08	2.85949e+08	26.7853	98.4501	270.858	4.10637	4.10637	10.1122	TRUE	FALSE	9.52479	9.01933	8.51793	23.1334	74.0799	235.02	3.08988	3.08988	10.1593	FALSE	FALSE
DW	M8PFOS	507.964	47.95	0.0943964	1	3.00403e+08	3.18235e+09	2.47938	40.6483	49.5187	60.3902	1.03272	1.03272	1.48567	FALSE	FALSE	3.03653e+09	2.1235e+09	5.8862e+08	50.2526	71.8596	259.24	1.49864	1.49864	5.15873	TRUE	FALSE	2.89158e+09	7.86711e+08	2.85949e+08	52.7718	193.964	533.639	4.04513	4.04513	10.1122	TRUE	FALSE	9.52479	9.01933	8.51793	45.577	145.95	463.03	3.04381	3.04381	10.1593	FALSE	FALSE
DW	M8PFOS	507.964	47.95	0.0943964	2	3.09232e+08	3.27589e+09	2.47938	42.1045	51.2134	62.3609	1.06806	1.06806	1.4811	FALSE	FALSE	3.03653e+09	2.1235e+09	5.8862e+08	51.7297	73.9718	266.86	1.54269	1.54269	5.15873	TRUE	FALSE	2.89158e+09	7.86711e+08	2.85949e+08	54.323	199.665	549.324	4.16403	4.16403	10.1122	TRUE	FALSE	9.52479	9.01933	8.51793	46.9166	150.24	476.64	3.13327	3.13327	10.1593	FALSE	FALSE
DW	M8PFOS	507.964	47.95	0.0943964	3	3.02311e+08	3.20257e+09	2.47938	40.958	49.8842	60.8217	1.04034	1.04034	1.48498	FALSE	FALSE	3.03653e+09	2.1235e+09	5.8862e+08	50.5719	72.3161	260.887	1.50816	1.50816	5.15873	TRUE	FALSE	2.89158e+09	7.86711e+08	2.85949e+08	53.1071	195.196	537.029	4.07083	4.07083	10.1122	TRUE	FALSE	9.52479	9.01933	8.51793	45.8665	146.878	465.972	3.06314	3.06314	10.1593	FALSE	FALSE
DW	M8PFOS	507.964	95.9	0.188793	1	5.7362e+08	3.03836e+09	2.47938	82.3041	100.454	122.811	1.04748	1.04748	1.49216	FALSE	FALSE	3.03653e+09	2.1235e+09	5.8862e+08	95.9577	137.216	495.02	1.43083	1.43083	5.15873	TRUE	FALSE	2.89158e+09	7.86711e+08	2.85949e+08	100.768	370.376	1018.99	3.8621	3.8621	10.1122	TRUE	FALSE	9.52479	9.01933	8.51793	87.0295	278.693	884.159	2.90608	2.90608	10.1593	FALSE	FALSE
DW	M8PFOS	507.964	95.9	0.188793	2	5.56289e+08	2.94656e+09	2.47938	79.29	96.8486	118.492	1.00989	1.00989	1.49441	FALSE	FALSE	3.03653e+09	2.1235e+09	5.8862e+08	93.0584	133.07	480.063	1.3876	1.3876	5.15873	FALSE	FALSE	2.89158e+09	7.86711e+08	2.85949e+08	97.7235	359.185	988.199	3.74541	3.74541	10.1122	TRUE	FALSE	9.52479	9.01933	8.51793	84.4	270.273	857.445	2.81828	2.81828	10.1593	FALSE	FALSE
DW	M8PFOS	507.964	95.9	0.188793	3	5.6955e+08	3.0168e+09	2.47938	81.5841	99.6047	121.809	1.03863	1.03863	1.49305	FALSE	FALSE	3.03653e+09	2.1235e+09	5.8862e+08	95.2768	136.243	491.507	1.42067	1.42067	5.15873	FALSE	FALSE	2.89158e+09	7.86711e+08	2.85949e+08	100.053	367.748	1011.76	3.8347	3.8347	10.1122	TRUE	FALSE	9.52479	9.01933	8.51793	86.412	276.716	877.886	2.88546	2.88546	10.1593	FALSE	FALSE
DW	M8PFOS	507.964	239.75	0.471982	1	1.03255e+09	2.18769e+09	2.47938	156.189	183.879	216.798	0.766961	1.30385	1.38805	FALSE	TRUE	3.03653e+09	2.1235e+09	5.8862e+08	172.729	246.997	891.063	1.03023	1.03023	5.15873	FALSE	FALSE	2.89158e+09	7.86711e+08	2.85949e+08	181.388	666.696	1834.23	2.7808	2.7808	10.1122	FALSE	FALSE	9.52479	9.01933	8.51793	156.658	501.663	1591.53	2.09244	2.09244	10.1593	FALSE	FALSE
DW	M8PFOS	507.964	239.75	0.471982	2	1.3386e+09	2.83614e+09	2.47938	207.186	254.029	312.251	1.05956	1.05956	1.5071	FALSE	FALSE	3.03653e+09	2.1235e+09	5.8862e+08	223.928	320.209	1155.18	1.3356	1.3356	5.15873	FALSE	FALSE	2.89158e+09	7.86711e+08	2.85949e+08	235.153	864.311	2377.91	3.60505	3.60505	10.1122	FALSE	FALSE	9.52479	9.01933	8.51793	203.093	650.36	2063.28	2.71266	2.71266	10.1593	FALSE	FALSE
DW	M8PFOS	507.964	239.75	0.471982	3	1.31137e+09	2.77842e+09	2.47938	201.734	247.554	304.551	1.03255	1.03255	1.50967	FALSE	FALSE	3.03653e+09	2.1235e+09	5.8862e+08	219.371	313.693	1131.68	1.30842	1.30842	5.15873	FALSE	FALSE	2.89158e+09	7.86711e+08	2.85949e+08	230.368	846.724	2329.53	3.5317	3.5317	10.1122	FALSE	FALSE	9.52479	9.01933	8.51793	198.96	637.127	2021.3	2.65746	2.65746	10.1593	FALSE	FALSE
DW	M7PFUdA	570.988	5	0.00875676	1	9.17864e+06	1.04818e+09	1.84528	4.70809	5.32144	6.0042	1.06429	1.06429	1.27529	FALSE	FALSE	3.14036e+09	1.06354e+09	8.65927e+08	1.66888	4.92778	6.05235	0.985556	1.01466	3.62659	FALSE	FALSE	3.2436e+09	8.03126e+08	2.86853e+08	1.61576	6.52561	18.2703	1.30512	1.30512	11.3075	FALSE	FALSE	9.22252	8.68147	8.13693	3.13969	10.9127	38.2364	2.18253	2.18253	12.1784	FALSE	FALSE
DW	M7PFUdA	570.988	5	0.00875676	2	9.02331e+06	1.03044e+09	1.84528	4.59532	5.20989	5.89571	1.04198	1.04198	1.28298	FALSE	FALSE	3.14036e+09	1.06354e+09	8.65927e+08	1.64064	4.84439	5.94992	0.968878	1.03212	3.62659	FALSE	FALSE	3.2436e+09	8.03126e+08	2.86853e+08	1.58842	6.41518	17.9611	1.28304	1.28304	11.3075	FALSE	FALSE	9.22252	8.68147	8.13693	3.08656	10.728	37.5893	2.1456	2.1456	12.1784	FALSE	FALSE
DW	M7PFUdA	570.988	5	0.00875676	3	8.39133e+06	9.58269e+08	1.84528	4.19456	4.75791	5.38652	0.951581	1.05088	1.28417	FALSE	FALSE	3.14036e+09	1.06354e+09	8.65927e+08	1.52573	4.5051	5.5332	0.901019	1.10985	3.62659	FALSE	FALSE	3.2436e+09	8.03126e+08	2.86853e+08	1.47717	5.96587	16.7031	1.19317	1.19317	11.3075	FALSE	FALSE	9.22252	8.68147	8.13693	2.87038	9.97663	34.9566	1.99533	1.99533	12.1784	FALSE	FALSE
DW	M7PFUdA	570.988	10	0.0175135	1	1.76342e+07	1.00689e+09	1.84528	9.20729	10.3879	11.7072	1.03879	1.03879	1.27152	FALSE	FALSE	3.14036e+09	1.06354e+09	8.65927e+08	3.20629	9.46736	11.6279	0.946736	1.05626	3.62659	FALSE	FALSE	3.2436e+09	8.03126e+08	2.86853e+08	3.10423	12.5371	35.1013	1.25371	1.25371	11.3075	FALSE	FALSE	9.22252	8.68147	8.13693	6.03204	20.9657	73.4606	2.09657	2.09657	12.1784	FALSE	FALSE
DW	M7PFUdA	570.988	10	0.0175135	2	1.59998e+07	9.13572e+08	1.84528	8.26327	9.28419	10.4198	0.928419	1.0771	1.26098	FALSE	FALSE	3.14036e+09	1.06354e+09	8.65927e+08	2.90913	8.58992	10.5502	0.858992	1.16416	3.62659	FALSE	FALSE	3.2436e+09	8.03126e+08	2.86853e+08	2.81653	11.3752	31.8481	1.13752	1.13752	11.3075	FALSE	FALSE	9.22252	8.68147	8.13693	5.47299	19.0225	66.6522	1.90225	1.90225	12.1784	FALSE	FALSE
DW	M7PFUdA	570.988	10	0.0175135	3	1.66146e+07	9.48672e+08	1.84528	8.5848	9.69851	10.9439	0.969851	1.03109	1.2748	FALSE	FALSE	3.14036e+09	1.06354e+09	8.65927e+08	3.0209	8.91995	10.9556	0.891995	1.12108	3.62659	FALSE	FALSE	3.2436e+09	8.03126e+08	2.86853e+08	2.92475	11.8122	33.0717	1.18122	1.18122	11.3075	FALSE	FALSE	9.22252	8.68147	8.13693	5.68327	19.7534	69.2131	1.97534	1.97534	12.1784	FALSE	FALSE
DW	M7PFUdA	570.988	25	0.0437838	1	4.0894e+07	9.33998e+08	1.84528	21.9099	24.6867	27.8073	0.987466	1.01269	1.26916	FALSE	FALSE	3.14036e+09	1.06354e+09	8.65927e+08	7.43544	21.9549	26.9653	0.878198	1.1387	3.62659	FALSE	FALSE	3.2436e+09	8.03126e+08	2.86853e+08	7.19877	29.0738	81.4004	1.16295	1.16295	11.3075	FALSE	FALSE	9.22252	8.68147	8.13693	13.9884	48.6197	170.356	1.94479	1.94479	12.1784	FALSE	FALSE
DW	M7PFUdA	570.988	25	0.0437838	2	4.03633e+07	9.21878e+08	1.84528	21.6124	24.3347	27.3918	0.973389	1.02734	1.26741	FALSE	FALSE	3.14036e+09	1.06354e+09	8.65927e+08	7.33896	21.6701	26.6154	0.866803	1.15367	3.62659	FALSE	FALSE	3.2436e+09	8.03126e+08	2.86853e+08	7.10536	28.6966	80.3441	1.14786	1.14786	11.3075	FALSE	FALSE	9.22252	8.68147	8.13693	13.8069	47.9888	168.146	1.91955	1.91955	12.1784	FALSE	FALSE
DW	M7PFUdA	570.988	25	0.0437838	3	4.00993e+07	9.15848e+08	1.84528	21.4687	24.1597	27.1799	0.96639	1.03478	1.26602	FALSE	FALSE	3.14036e+09	1.06354e+09	8.65927e+08	7.29095	21.5283	26.4413	0.861133	1.16126	3.62659	FALSE	FALSE	3.2436e+09	8.03126e+08	2.86853e+08	7.05888	28.5088	79.8186	1.14035	1.14035	11.3075	FALSE	FALSE	9.22252	8.68147	8.13693	13.7166	47.6749	167.046	1.907	1.907	12.1784	FALSE	FALSE
DW	M7PFUdA	570.988	50	0.0875676	1	8.22853e+07	9.39678e+08	1.84528	45.2736	50.987	57.4421	1.01974	1.01974	1.26878	FALSE	FALSE	3.14036e+09	1.06354e+09	8.65927e+08	14.9613	44.1769	54.2585	0.883538	1.13181	3.62659	FALSE	FALSE	3.2436e+09	8.03126e+08	2.86853e+08	14.4851	58.5012	163.791	1.17002	1.17002	11.3075	FALSE	FALSE	9.22252	8.68147	8.13693	28.1469	97.8307	342.784	1.95661	1.95661	12.1784	FALSE	FALSE
DW	M7PFUdA	570.988	50	0.0875676	2	8.43134e+07	9.62839e+08	1.84528	46.6069	52.3733	58.8748	1.04747	1.04747	1.26322	FALSE	FALSE	3.14036e+09	1.06354e+09	8.65927e+08	15.3301	45.2658	55.5958	0.905316	1.10459	3.62659	FALSE	FALSE	3.2436e+09	8.03126e+08	2.86853e+08	14.8421	59.9432	167.828	1.19886	1.19886	11.3075	FALSE	FALSE	9.22252	8.68147	8.13693	28.8407	100.242	351.233	2.00484	2.00484	12.1784	FALSE	FALSE
DW	M7PFUdA	570.988	50	0.0875676	3	8.26319e+07	9.43636e+08	1.84528	45.4949	51.2237	57.6947	1.02447	1.02447	1.26816	FALSE	FALSE	3.14036e+09	1.06354e+09	8.65927e+08	15.0243	44.363	54.4871	0.887261	1.12706	3.62659	FALSE	FALSE	3.2436e+09	8.03126e+08	2.86853e+08	14.5461	58.7477	164.481	1.17495	1.17495	11.3075	FALSE	FALSE	9.22252	8.68147	8.13693	28.2655	98.2428	344.228	1.96486	1.96486	12.1784	FALSE	FALSE
DW	M7PFUdA	570.988	100	0.175135	1	1.60466e+08	9.1624e+08	1.84528	90.2194	101.802	114.988	1.01802	1.01802	1.27454	FALSE	FALSE	3.14036e+09	1.06354e+09	8.65927e+08	29.1763	86.1501	105.81	0.861501	1.16077	3.62659	FALSE	FALSE	3.2436e+09	8.03126e+08	2.86853e+08	28.2476	114.084	319.411	1.14084	1.14084	11.3075	FALSE	FALSE	9.22252	8.68147	8.13693	54.8897	190.781	668.469	1.90781	1.90781	12.1784	FALSE	FALSE
DW	M7PFUdA	570.988	100	0.175135	2	1.60314e+08	9.15373e+08	1.84528	90.1186	101.692	114.868	1.01692	1.01692	1.27463	FALSE	FALSE	3.14036e+09	1.06354e+09	8.65927e+08	29.1487	86.0686	105.71	0.860686	1.16186	3.62659	FALSE	FALSE	3.2436e+09	8.03126e+08	2.86853e+08	28.2209	113.976	319.109	1.13976	1.13976	11.3075	FALSE	FALSE	9.22252	8.68147	8.13693	54.8378	190.601	667.837	1.90601	1.90601	12.1784	FALSE	FALSE
DW	M7PFUdA	570.988	100	0.175135	3	1.59823e+08	9.1257e+08	1.84528	89.7947	101.337	114.479	1.01337	1.01337	1.27489	FALSE	FALSE	3.14036e+09	1.06354e+09	8.65927e+08	29.0594	85.805	105.387	0.85805	1.16543	3.62659	FALSE	FALSE	3.2436e+09	8.03126e+08	2.86853e+08	28.1345	113.627	318.132	1.13627	1.13627	11.3075	FALSE	FALSE	9.22252	8.68147	8.13693	54.6699	190.017	665.792	1.90017	1.90017	12.1784	FALSE	FALSE
DW	M7PFUdA	570.988	250	0.437838	1	3.32169e+08	7.58657e+08	1.84528	193.384	209.253	226.592	0.837013	1.19472	1.17172	FALSE	TRUE	3.14036e+09	1.06354e+09	8.65927e+08	60.3957	178.333	219.03	0.713332	1.40187	3.62659	FALSE	TRUE	3.2436e+09	8.03126e+08	2.86853e+08	58.4733	236.157	661.189	0.944629	1.05862	11.3075	FALSE	FALSE	9.22252	8.68147	8.13693	113.623	394.922	1383.75	1.57969	1.57969	12.1784	FALSE	FALSE
DW	M7PFUdA	570.988	250	0.437838	2	4.05697e+08	9.26591e+08	1.84528	238.112	268.93	304.327	1.07572	1.07572	1.27808	FALSE	FALSE	3.14036e+09	1.06354e+09	8.65927e+08	73.7647	217.808	267.514	0.871233	1.1478	3.62659	FALSE	FALSE	3.2436e+09	8.03126e+08	2.86853e+08	71.4168	288.432	807.548	1.15373	1.15373	11.3075	FALSE	FALSE	9.22252	8.68147	8.13693	138.775	482.341	1690.05	1.92936	1.92936	12.1784	FALSE	FALSE
DW	M7PFUdA	570.988	250	0.437838	3	3.99617e+08	9.12705e+08	1.84528	232.96	263.809	299.346	1.05524	1.05524	1.28497	FALSE	FALSE	3.14036e+09	1.06354e+09	8.65927e+08	72.6593	214.544	263.505	0.858177	1.16526	3.62659	FALSE	FALSE	3.2436e+09	8.03126e+08	2.86853e+08	70.3465	284.11	795.447	1.13644	1.13644	11.3075	FALSE	FALSE	9.22252	8.68147	8.13693	136.695	475.113	1664.73	1.90045	1.90045	12.1784	FALSE	FALSE
DW	d3-N-MeFOSAA	573.993	5	0.0087109	1	5.99465e+06	6.88178e+08	2.25662	4.73686	5.33929	6.00829	1.06786	1.06786	1.26841	FALSE	FALSE	4.01955e+09	1.12631e+09	6.53579e+08	0.856037	3.055	5.26469	0.611001	1.63666	6.15007	FALSE	FALSE	3.22569e+09	8.42853e+08	2.8663e+08	1.06671	4.08243	12.0046	0.816486	1.22476	11.2538	FALSE	FALSE	9.47934	8.93725	8.3967	1.14113	3.97572	13.8029	0.795144	1.25763	12.0959	FALSE	FALSE
DW	d3-N-MeFOSAA	573.993	5	0.0087109	2	5.35922e+06	6.15231e+08	2.25662	4.11879	4.64636	5.23219	0.929273	1.07611	1.27032	FALSE	FALSE	4.01955e+09	1.12631e+09	6.53579e+08	0.765298	2.73117	4.70663	0.546235	1.83071	6.15007	FALSE	TRUE	3.22569e+09	8.42853e+08	2.8663e+08	0.953641	3.6497	10.7321	0.729939	1.36998	11.2538	FALSE	FALSE	9.47934	8.93725	8.3967	1.02017	3.55429	12.3398	0.710859	1.40675	12.0959	FALSE	FALSE
DW	d3-N-MeFOSAA	573.993	5	0.0087109	3	5.95439e+06	6.83556e+08	2.25662	4.69102	5.29519	5.96692	1.05904	1.05904	1.27199	FALSE	FALSE	4.01955e+09	1.12631e+09	6.53579e+08	0.850288	3.03449	5.22933	0.606898	1.64772	6.15007	FALSE	FALSE	3.22569e+09	8.42853e+08	2.8663e+08	1.05955	4.05502	11.924	0.811003	1.23304	11.2538	FALSE	FALSE	9.47934	8.93725	8.3967	1.13346	3.94902	13.7102	0.789804	1.26614	12.0959	FALSE	FALSE
DW	d3-N-MeFOSAA	573.993	10	0.0174218	1	1.09877e+07	6.30686e+08	2.25662	8.70426	9.82011	11.0665	0.982011	1.01832	1.27139	FALSE	FALSE	4.01955e+09	1.12631e+09	6.53579e+08	1.56905	5.59957	9.64973	0.559957	1.78585	6.15007	FALSE	TRUE	3.22569e+09	8.42853e+08	2.8663e+08	1.9552	7.48276	22.0035	0.748276	1.33641	11.2538	FALSE	FALSE	9.47934	8.93725	8.3967	2.09159	7.28716	25.2996	0.728716	1.37228	12.0959	FALSE	FALSE
DW	d3-N-MeFOSAA	573.993	10	0.0174218	2	1.08383e+07	6.22111e+08	2.25662	8.57626	9.66708	10.8844	0.966708	1.03444	1.26913	FALSE	FALSE	4.01955e+09	1.12631e+09	6.53579e+08	1.54771	5.52343	9.51852	0.552343	1.81047	6.15007	FALSE	TRUE	3.22569e+09	8.42853e+08	2.8663e+08	1.92861	7.38101	21.7043	0.738101	1.35483	11.2538	FALSE	FALSE	9.47934	8.93725	8.3967	2.06315	7.18808	24.9556	0.718808	1.39119	12.0959	FALSE	FALSE
DW	d3-N-MeFOSAA	573.993	10	0.0174218	3	1.09591e+07	6.29045e+08	2.25662	8.67933	9.7908	11.0321	0.97908	1.02137	1.27108	FALSE	FALSE	4.01955e+09	1.12631e+09	6.53579e+08	1.56496	5.58499	9.62461	0.558499	1.79051	6.15007	FALSE	TRUE	3.22569e+09	8.42853e+08	2.8663e+08	1.95011	7.46328	21.9462	0.746328	1.33989	11.2538	FALSE	FALSE	9.47934	8.93725	8.3967	2.08615	7.26819	25.2338	0.726819	1.37586	12.0959	FALSE	FALSE
DW	d3-N-MeFOSAA	573.993	25	0.0435545	1	2.70981e+07	6.22166e+08	2.25662	22.0987	24.8549	27.9471	0.994195	1.00584	1.26465	FALSE	FALSE	4.01955e+09	1.12631e+09	6.53579e+08	3.86962	13.8098	23.7984	0.552392	1.81031	6.15007	FALSE	TRUE	3.22569e+09	8.42853e+08	2.8663e+08	4.82195	18.4542	54.2655	0.738167	1.35471	11.2538	FALSE	FALSE	9.47934	8.93725	8.3967	5.15834	17.9718	62.3945	0.718871	1.39107	12.0959	FALSE	FALSE
DW	d3-N-MeFOSAA	573.993	25	0.0435545	2	2.62455e+07	6.0259e+08	2.25662	21.3841	24.0026	26.9337	0.960103	1.04156	1.25952	FALSE	FALSE	4.01955e+09	1.12631e+09	6.53579e+08	3.74786	13.3753	23.0496	0.535011	1.86912	6.15007	FALSE	TRUE	3.22569e+09	8.42853e+08	2.8663e+08	4.67023	17.8735	52.5581	0.714941	1.39872	11.2538	FALSE	FALSE	9.47934	8.93725	8.3967	4.99603	17.4063	60.4313	0.696252	1.43626	12.0959	FALSE	FALSE
DW	d3-N-MeFOSAA	573.993	25	0.0435545	3	2.70363e+07	6.20745e+08	2.25662	22.0445	24.793	27.8764	0.991718	1.00835	1.26455	FALSE	FALSE	4.01955e+09	1.12631e+09	6.53579e+08	3.86078	13.7783	23.7441	0.551131	1.81445	6.15007	FALSE	TRUE	3.22569e+09	8.42853e+08	2.8663e+08	4.81094	18.412	54.1416	0.736481	1.35781	11.2538	FALSE	FALSE	9.47934	8.93725	8.3967	5.14656	17.9308	62.2521	0.71723	1.39425	12.0959	FALSE	FALSE
DW	d3-N-MeFOSAA	573.993	50	0.087109	1	5.54961e+07	6.37088e+08	2.25662	46.3702	52.0415	58.4272	1.04083	1.04083	1.26002	FALSE	FALSE	4.01955e+09	1.12631e+09	6.53579e+08	7.92486	28.282	48.7384	0.565641	1.76791	6.15007	FALSE	TRUE	3.22569e+09	8.42853e+08	2.8663e+08	9.8752	37.7935	111.134	0.755871	1.32298	11.2538	FALSE	FALSE	9.47934	8.93725	8.3967	10.5641	36.8056	127.782	0.736113	1.35849	12.0959	FALSE	FALSE
DW	d3-N-MeFOSAA	573.993	50	0.087109	2	5.66398e+07	6.50217e+08	2.25662	47.5579	53.2161	59.5686	1.06432	1.06432	1.25255	FALSE	FALSE	4.01955e+09	1.12631e+09	6.53579e+08	8.08817	28.8649	49.7428	0.577297	1.73221	6.15007	FALSE	TRUE	3.22569e+09	8.42853e+08	2.8663e+08	10.0787	38.5724	113.424	0.771448	1.29626	11.2538	FALSE	FALSE	9.47934	8.93725	8.3967	10.7818	37.5641	130.415	0.751283	1.33106	12.0959	FALSE	FALSE
DW	d3-N-MeFOSAA	573.993	50	0.087109	3	5.36668e+07	6.16088e+08	2.25662	44.6135	50.1688	56.4349	1.00338	1.00338	1.26497	FALSE	FALSE	4.01955e+09	1.12631e+09	6.53579e+08	7.66363	27.3498	47.1319	0.546996	1.82817	6.15007	FALSE	TRUE	3.22569e+09	8.42853e+08	2.8663e+08	9.54969	36.5478	107.471	0.730956	1.36807	11.2538	FALSE	FALSE	9.47934	8.93725	8.3967	10.2159	35.5924	123.57	0.711849	1.40479	12.0959	FALSE	FALSE
DW	d3-N-MeFOSAA	573.993	100	0.174218	1	1.03985e+08	5.96868e+08	2.25662	87.7602	98.834	111.412	0.98834	1.0118	1.2695	FALSE	FALSE	4.01955e+09	1.12631e+09	6.53579e+08	14.8491	52.9931	91.323	0.529931	1.88704	6.15007	FALSE	TRUE	3.22569e+09	8.42853e+08	2.8663e+08	18.5035	70.8152	208.236	0.708152	1.41213	11.2538	FALSE	FALSE	9.47934	8.93725	8.3967	19.7944	68.9641	239.43	0.689641	1.45003	12.0959	FALSE	FALSE
DW	d3-N-MeFOSAA	573.993	100	0.174218	2	1.05189e+08	6.03781e+08	2.25662	88.8864	100.129	112.904	1.00129	1.00129	1.27021	FALSE	FALSE	4.01955e+09	1.12631e+09	6.53579e+08	15.0211	53.6069	92.3807	0.536069	1.86543	6.15007	FALSE	TRUE	3.22569e+09	8.42853e+08	2.8663e+08	18.7179	71.6354	210.648	0.716354	1.39596	11.2538	FALSE	FALSE	9.47934	8.93725	8.3967	20.0236	69.7629	242.203	0.697629	1.43343	12.0959	FALSE	FALSE
DW	d3-N-MeFOSAA	573.993	100	0.174218	3	1.06791e+08	6.12972e+08	2.25662	90.4461	101.857	114.819	1.01857	1.01857	1.26948	FALSE	FALSE	4.01955e+09	1.12631e+09	6.53579e+08	15.2497	54.4229	93.7869	0.544229	1.83746	6.15007	FALSE	TRUE	3.22569e+09	8.42853e+08	2.8663e+08	19.0028	72.7258	213.854	0.727258	1.37503	11.2538	FALSE	FALSE	9.47934	8.93725	8.3967	20.3284	70.8248	245.89	0.708248	1.41193	12.0959	FALSE	FALSE
DW	d3-N-MeFOSAA	573.993	250	0.435545	1	2.2378e+08	5.13793e+08	2.25662	194.596	211.149	229.293	0.844598	1.184	1.1783	FALSE	TRUE	4.01955e+09	1.12631e+09	6.53579e+08	31.9558	114.043	196.531	0.456173	2.19215	6.15007	FALSE	TRUE	3.22569e+09	8.42853e+08	2.8663e+08	39.8203	152.397	448.132	0.609588	1.64045	11.2538	FALSE	FALSE	9.47934	8.93725	8.3967	42.5983	148.413	515.263	0.593654	1.68448	12.0959	FALSE	FALSE
DW	d3-N-MeFOSAA	573.993	250	0.435545	2	2.68244e+08	6.15881e+08	2.25662	234.231	264.598	299.481	1.05839	1.05839	1.27857	FALSE	FALSE	4.01955e+09	1.12631e+09	6.53579e+08	38.3053	136.703	235.58	0.546812	1.82878	6.15007	FALSE	TRUE	3.22569e+09	8.42853e+08	2.8663e+08	47.7325	182.678	537.174	0.730711	1.36853	11.2538	FALSE	FALSE	9.47934	8.93725	8.3967	51.0623	177.903	617.643	0.71161	1.40526	12.0959	FALSE	FALSE
DW	d3-N-MeFOSAA	573.993	250	0.435545	3	2.72475e+08	6.25595e+08	2.25662	239.621	269.886	304.537	1.07954	1.07954	1.27092	FALSE	FALSE	4.01955e+09	1.12631e+09	6.53579e+08	38.9095	138.859	239.296	0.555437	1.80039	6.15007	FALSE	TRUE	3.22569e+09	8.42853e+08	2.8663e+08	48.4853	185.559	545.646	0.742235	1.34728	11.2538	FALSE	FALSE	9.47934	8.93725	8.3967	51.8677	180.708	627.384	0.722834	1.38344	12.0959	FALSE	FALSE
DW	MPFDoA	615.968	1	0.00162346	1	4.82557e+06	2.97239e+09	2.22012	0.855352	0.978933	1.11845	0.978933	1.02152	1.30759	FALSE	FALSE	1.09562e+09	9.26591e+08	8.12571e+08	2.71297	3.20788	3.65801	3.20788	3.20788	1.34834	TRUE	FALSE	3.14307e+09	7.86711e+08	2.85412e+08	0.945698	3.77825	10.4144	3.77825	3.77825	11.0124	FALSE	FALSE	9.38028	8.88785	8.39566	1.23831	3.8482	11.9523	3.8482	3.8482	9.65213	TRUE	FALSE
DW	MPFDoA	615.968	1	0.00162346	2	4.69301e+06	2.89074e+09	2.22012	0.827839	0.945494	1.07806	0.945494	1.05765	1.30226	FALSE	FALSE	1.09562e+09	9.26591e+08	8.12571e+08	2.63844	3.11976	3.55753	3.11976	3.11976	1.34834	TRUE	FALSE	3.14307e+09	7.86711e+08	2.85412e+08	0.919719	3.67446	10.1283	3.67446	3.67446	11.0124	FALSE	FALSE	9.38028	8.88785	8.39566	1.20429	3.74248	11.624	3.74248	3.74248	9.65213	TRUE	FALSE
DW	MPFDoA	615.968	1	0.00162346	3	4.44568e+06	2.73839e+09	2.22012	0.782213	0.883441	0.996345	0.883441	1.13194	1.27375	FALSE	TRUE	1.09562e+09	9.26591e+08	8.12571e+08	2.49939	2.95534	3.37004	2.95534	2.95534	1.34834	TRUE	FALSE	3.14307e+09	7.86711e+08	2.85412e+08	0.871248	3.48081	9.59453	3.48081	3.48081	11.0124	FALSE	FALSE	9.38028	8.88785	8.39566	1.14082	3.54525	11.0114	3.54525	3.54525	9.65213	TRUE	FALSE
DW	MPFDoA	615.968	5	0.00811731	1	2.60832e+07	3.21328e+09	2.22012	4.78407	5.39371	6.07735	1.07874	1.07874	1.27033	FALSE	FALSE	1.09562e+09	9.26591e+08	8.12571e+08	14.6641	17.3392	19.7723	3.46785	3.46785	1.34834	TRUE	FALSE	3.14307e+09	7.86711e+08	2.85412e+08	5.11168	20.4222	56.2919	4.08444	4.08444	11.0124	TRUE	FALSE	9.38028	8.88785	8.39566	6.69329	20.8003	64.6045	4.16005	4.16005	9.65213	TRUE	FALSE
DW	MPFDoA	615.968	5	0.00811731	2	2.59902e+07	3.20182e+09	2.22012	4.76261	5.37279	6.05742	1.07456	1.07456	1.27187	FALSE	FALSE	1.09562e+09	9.26591e+08	8.12571e+08	14.6118	17.2774	19.7018	3.45548	3.45548	1.34834	TRUE	FALSE	3.14307e+09	7.86711e+08	2.85412e+08	5.09346	20.3494	56.0912	4.06988	4.06988	11.0124	TRUE	FALSE	9.38028	8.88785	8.39566	6.66942	20.7261	64.3742	4.14522	4.14522	9.65213	TRUE	FALSE
DW	MPFDoA	615.968	5	0.00811731	3	2.6126e+07	3.21855e+09	2.22012	4.79402	5.40334	6.08646	1.08067	1.08067	1.26959	FALSE	FALSE	1.09562e+09	9.26591e+08	8.12571e+08	14.6882	17.3677	19.8048	3.47354	3.47354	1.34834	TRUE	FALSE	3.14307e+09	7.86711e+08	2.85412e+08	5.12007	20.4557	56.3843	4.09115	4.09115	11.0124	TRUE	FALSE	9.38028	8.88785	8.39566	6.70428	20.8344	64.7106	4.16688	4.16688	9.65213	TRUE	FALSE
DW	MPFDoA	615.968	10	0.0162346	1	4.80875e+07	2.96203e+09	2.22012	8.75466	9.91397	11.2228	0.991397	1.00868	1.28193	FALSE	FALSE	1.09562e+09	9.26591e+08	8.12571e+08	27.0351	31.967	36.4526	3.1967	3.1967	1.34834	TRUE	FALSE	3.14307e+09	7.86711e+08	2.85412e+08	9.42401	37.6508	103.781	3.76508	3.76508	11.0124	FALSE	FALSE	9.38028	8.88785	8.39566	12.3399	38.3478	119.106	3.83478	3.83478	9.65213	TRUE	FALSE
DW	MPFDoA	615.968	10	0.0162346	2	5.22369e+07	3.21762e+09	2.22012	9.6239	10.8266	12.1763	1.08266	1.08266	1.26521	FALSE	FALSE	1.09562e+09	9.26591e+08	8.12571e+08	29.3679	34.7254	39.5981	3.47254	3.47254	1.34834	TRUE	FALSE	3.14307e+09	7.86711e+08	2.85412e+08	10.2372	40.8997	112.736	4.08997	4.08997	11.0124	TRUE	FALSE	9.38028	8.88785	8.39566	13.4047	41.6568	129.384	4.16568	4.16568	9.65213	TRUE	FALSE
DW	MPFDoA	615.968	10	0.0162346	3	4.92872e+07	3.03593e+09	2.22012	8.99022	10.1775	11.5177	1.01775	1.01775	1.28114	FALSE	FALSE	1.09562e+09	9.26591e+08	8.12571e+08	27.7096	32.7645	37.362	3.27645	3.27645	1.34834	TRUE	FALSE	3.14307e+09	7.86711e+08	2.85412e+08	9.65912	38.5901	106.37	3.85901	3.85901	11.0124	FALSE	FALSE	9.38028	8.88785	8.39566	12.6478	39.3045	122.078	3.93045	3.93045	9.65213	TRUE	FALSE
DW	MPFDoA	615.968	25	0.0405866	1	1.20241e+08	2.96259e+09	2.22012	22.0228	24.9221	28.2057	0.996884	1.00313	1.28075	FALSE	FALSE	1.09562e+09	9.26591e+08	8.12571e+08	67.6005	79.9326	91.1487	3.1973	3.1973	1.34834	TRUE	FALSE	3.14307e+09	7.86711e+08	2.85412e+08	23.5645	94.1448	259.501	3.76579	3.76579	11.0124	FALSE	FALSE	9.38028	8.88785	8.39566	30.8556	95.8876	297.822	3.8355	3.8355	9.65213	TRUE	FALSE
DW	MPFDoA	615.968	25	0.0405866	2	1.15949e+08	2.85684e+09	2.22012	21.2299	23.9834	27.0959	0.959335	1.04239	1.2763	FALSE	FALSE	1.09562e+09	9.26591e+08	8.12571e+08	65.1874	77.0792	87.895	3.08317	3.08317	1.34834	TRUE	FALSE	3.14307e+09	7.86711e+08	2.85412e+08	22.7233	90.7841	250.238	3.63137	3.63137	11.0124	FALSE	FALSE	9.38028	8.88785	8.39566	29.7541	92.4647	287.191	3.69859	3.69859	9.65213	TRUE	FALSE
DW	MPFDoA	615.968	25	0.0405866	3	1.14447e+08	2.81983e+09	2.22012	20.9679	23.6554	26.6889	0.946214	1.05684	1.27285	FALSE	FALSE	1.09562e+09	9.26591e+08	8.12571e+08	64.3429	76.0806	86.7563	3.04323	3.04323	1.34834	TRUE	FALSE	3.14307e+09	7.86711e+08	2.85412e+08	22.4289	89.608	246.996	3.58432	3.58432	11.0124	FALSE	FALSE	9.38028	8.88785	8.39566	29.3686	91.2668	283.47	3.65067	3.65067	9.65213	TRUE	FALSE
DW	MPFDoA	615.968	50	0.0811731	1	2.4366e+08	3.00174e+09	2.22012	44.8268	50.7508	57.4829	1.01502	1.01502	1.28233	FALSE	FALSE	1.09562e+09	9.26591e+08	8.12571e+08	136.987	161.977	184.706	3.23955	3.23955	1.34834	TRUE	FALSE	3.14307e+09	7.86711e+08	2.85412e+08	47.7517	190.778	525.861	3.81555	3.81555	11.0124	FALSE	FALSE	9.38028	8.88785	8.39566	62.5265	194.309	603.514	3.88618	3.88618	9.65213	TRUE	FALSE
DW	MPFDoA	615.968	50	0.0811731	2	2.4215e+08	2.98313e+09	2.22012	44.5237	50.4143	57.109	1.00829	1.00829	1.28266	FALSE	FALSE	1.09562e+09	9.26591e+08	8.12571e+08	136.138	160.973	183.561	3.21947	3.21947	1.34834	TRUE	FALSE	3.14307e+09	7.86711e+08	2.85412e+08	47.4557	189.595	522.601	3.7919	3.7919	11.0124	FALSE	FALSE	9.38028	8.88785	8.39566	62.1389	193.105	599.773	3.86209	3.86209	9.65213	TRUE	FALSE
DW	MPFDoA	615.968	50	0.0811731	3	2.39673e+08	2.95261e+09	2.22012	44.0357	49.8628	56.4854	0.997256	1.00275	1.28272	FALSE	FALSE	1.09562e+09	9.26591e+08	8.12571e+08	134.746	159.327	181.683	3.18653	3.18653	1.34834	TRUE	FALSE	3.14307e+09	7.86711e+08	2.85412e+08	46.9702	187.655	517.255	3.75311	3.75311	11.0124	FALSE	FALSE	9.38028	8.88785	8.39566	61.5033	191.129	593.638	3.82259	3.82259	9.65213	TRUE	FALSE
DW	MPFDoA	615.968	100	0.162346	1	4.727e+08	2.91168e+09	2.22012	86.9609	98.6043	111.894	0.986043	1.01415	1.28672	FALSE	FALSE	1.09562e+09	9.26591e+08	8.12571e+08	265.755	314.236	358.33	3.14236	3.14236	1.34834	TRUE	FALSE	3.14307e+09	7.86711e+08	2.85412e+08	92.6381	370.108	1020.17	3.70108	3.70108	11.0124	FALSE	FALSE	9.38028	8.88785	8.39566	121.301	376.959	1170.82	3.76959	3.76959	9.65213	TRUE	FALSE
DW	MPFDoA	615.968	100	0.162346	2	4.88218e+08	3.00726e+09	2.22012	90.1138	102.175	115.943	1.02175	1.02175	1.28663	FALSE	FALSE	1.09562e+09	9.26591e+08	8.12571e+08	274.479	324.551	370.093	3.24551	3.24551	1.34834	TRUE	FALSE	3.14307e+09	7.86711e+08	2.85412e+08	95.6791	382.258	1053.66	3.82258	3.82258	11.0124	FALSE	FALSE	9.38028	8.88785	8.39566	125.283	389.334	1209.25	3.89334	3.89334	9.65213	TRUE	FALSE
DW	MPFDoA	615.968	100	0.162346	3	4.76119e+08	2.93274e+09	2.22012	87.6356	99.3894	112.809	0.993894	1.00614	1.28725	FALSE	FALSE	1.09562e+09	9.26591e+08	8.12571e+08	267.677	316.508	360.921	3.16508	3.16508	1.34834	TRUE	FALSE	3.14307e+09	7.86711e+08	2.85412e+08	93.308	372.785	1027.55	3.72785	3.72785	11.0124	FALSE	FALSE	9.38028	8.88785	8.39566	122.179	379.685	1179.28	3.79685	3.79685	9.65213	TRUE	FALSE
DW	MPFDoA	615.968	250	0.405866	1	1.04109e+09	2.56511e+09	2.22012	192.744	213.607	236.916	0.854427	1.17037	1.22917	FALSE	TRUE	1.09562e+09	9.26591e+08	8.12571e+08	585.308	692.083	789.196	2.76833	2.76833	1.34834	TRUE	FALSE	3.14307e+09	7.86711e+08	2.85412e+08	204.029	815.137	2246.85	3.26055	3.26055	11.0124	FALSE	FALSE	9.38028	8.88785	8.39566	267.158	830.227	2578.64	3.32091	3.32091	9.65213	TRUE	FALSE
DW	MPFDoA	615.968	250	0.405866	2	1.24333e+09	3.06341e+09	2.22012	231.398	263.001	299.315	1.05201	1.05201	1.29351	FALSE	FALSE	1.09562e+09	9.26591e+08	8.12571e+08	699.01	826.528	942.506	3.30611	3.30611	1.34834	TRUE	FALSE	3.14307e+09	7.86711e+08	2.85412e+08	243.664	973.487	2683.33	3.89395	3.89395	11.0124	FALSE	FALSE	9.38028	8.88785	8.39566	319.056	991.508	3079.57	3.96603	3.96603	9.65213	TRUE	FALSE
DW	MPFDoA	615.968	250	0.405866	3	1.23624e+09	3.04592e+09	2.22012	229.715	261.229	297.461	1.04492	1.04492	1.29491	FALSE	FALSE	1.09562e+09	9.26591e+08	8.12571e+08	695.02	821.81	937.126	3.28724	3.28724	1.34834	TRUE	FALSE	3.14307e+09	7.86711e+08	2.85412e+08	242.273	967.93	2668.01	3.87172	3.87172	11.0124	FALSE	FALSE	9.38028	8.88785	8.39566	317.235	985.848	3061.99	3.94339	3.94339	9.65213	TRUE	FALSE
DW	d5-N-EtFOSAA	590.022	5	0.00847427	1	6.55387e+06	7.73385e+08	2.2061	5.10572	5.65999	6.26684	1.132	1.132	1.22742	TRUE	FALSE	4.01955e+09	1.12631e+09	6.05424e+08	0.962028	3.43326	6.38714	0.686653	1.45634	6.63924	FALSE	FALSE	3.22276e+09	8.42853e+08	2.87993e+08	1.19988	4.5879	13.4272	0.917581	1.08982	11.1904	FALSE	FALSE	9.44806	8.90588	8.36515	1.37818	4.80276	16.6808	0.960551	1.04107	12.1035	FALSE	FALSE
DW	d5-N-EtFOSAA	590.022	5	0.00847427	2	5.67372e+06	6.69524e+08	2.2061	4.1911	4.73903	5.34877	0.947807	1.05507	1.27622	FALSE	FALSE	4.01955e+09	1.12631e+09	6.05424e+08	0.832833	2.97219	5.52938	0.594439	1.68226	6.63924	FALSE	FALSE	3.22276e+09	8.42853e+08	2.87993e+08	1.03874	3.97177	11.624	0.794354	1.25888	11.1904	FALSE	FALSE	9.44806	8.90588	8.36515	1.1931	4.15777	14.4406	0.831554	1.20257	12.1035	FALSE	FALSE
DW	d5-N-EtFOSAA	590.022	5	0.00847427	3	5.67883e+06	6.70126e+08	2.2061	4.19524	4.74434	5.35545	0.948869	1.05389	1.27656	FALSE	FALSE	4.01955e+09	1.12631e+09	6.05424e+08	0.833582	2.97487	5.53435	0.594974	1.68075	6.63924	FALSE	FALSE	3.22276e+09	8.42853e+08	2.87993e+08	1.03968	3.97534	11.6344	0.795069	1.25775	11.1904	FALSE	FALSE	9.44806	8.90588	8.36515	1.19417	4.16151	14.4536	0.832302	1.20149	12.1035	FALSE	FALSE
DW	d5-N-EtFOSAA	590.022	10	0.0169485	1	1.15856e+07	6.83577e+08	2.2061	8.80566	9.93194	11.1898	0.993194	1.00685	1.27075	FALSE	FALSE	4.01955e+09	1.12631e+09	6.05424e+08	1.70063	6.06916	11.2909	0.606916	1.64767	6.63924	FALSE	FALSE	3.22276e+09	8.42853e+08	2.87993e+08	2.12109	8.11028	23.7359	0.811028	1.233	11.1904	FALSE	FALSE	9.44806	8.90588	8.36515	2.43628	8.49009	29.4875	0.849009	1.17784	12.1035	FALSE	FALSE
DW	d5-N-EtFOSAA	590.022	10	0.0169485	2	1.1724e+07	6.91742e+08	2.2061	8.92702	10.0675	11.3412	1.00675	1.00675	1.27043	FALSE	FALSE	4.01955e+09	1.12631e+09	6.05424e+08	1.72094	6.14165	11.4257	0.614165	1.62823	6.63924	FALSE	FALSE	3.22276e+09	8.42853e+08	2.87993e+08	2.14642	8.20715	24.0194	0.820715	1.21845	11.1904	FALSE	FALSE	9.44806	8.90588	8.36515	2.46538	8.59149	29.8397	0.859149	1.16394	12.1035	FALSE	FALSE
DW	d5-N-EtFOSAA	590.022	10	0.0169485	3	1.16828e+07	6.89311e+08	2.2061	8.89044	10.0271	11.2966	1.00271	1.00271	1.27065	FALSE	FALSE	4.01955e+09	1.12631e+09	6.05424e+08	1.71489	6.12007	11.3856	0.612007	1.63397	6.63924	FALSE	FALSE	3.22276e+09	8.42853e+08	2.87993e+08	2.13888	8.1783	23.935	0.81783	1.22275	11.1904	FALSE	FALSE	9.44806	8.90588	8.36515	2.45672	8.5613	29.7348	0.85613	1.16805	12.1035	FALSE	FALSE
DW	d5-N-EtFOSAA	590.022	25	0.0423713	1	2.79341e+07	6.5927e+08	2.2061	21.7615	24.45	27.4629	0.978	1.02249	1.26199	FALSE	FALSE	4.01955e+09	1.12631e+09	6.05424e+08	4.10039	14.6334	27.2235	0.585335	1.70842	6.63924	FALSE	FALSE	3.22276e+09	8.42853e+08	2.87993e+08	5.11417	19.5547	57.2297	0.782189	1.27846	11.1904	FALSE	FALSE	9.44806	8.90588	8.36515	5.87413	20.4705	71.0973	0.818819	1.22127	12.1035	FALSE	FALSE
DW	d5-N-EtFOSAA	590.022	25	0.0423713	2	2.77851e+07	6.55753e+08	2.2061	21.6432	24.3081	27.2933	0.972323	1.02847	1.26106	FALSE	FALSE	4.01955e+09	1.12631e+09	6.05424e+08	4.07852	14.5553	27.0783	0.582213	1.71759	6.63924	FALSE	FALSE	3.22276e+09	8.42853e+08	2.87993e+08	5.08689	19.4504	56.9244	0.778016	1.28532	11.1904	FALSE	FALSE	9.44806	8.90588	8.36515	5.84279	20.3613	70.7181	0.814451	1.22782	12.1035	FALSE	FALSE
DW	d5-N-EtFOSAA	590.022	25	0.0423713	3	2.80829e+07	6.62781e+08	2.2061	21.8817	24.5918	27.6298	0.98367	1.0166	1.26269	FALSE	FALSE	4.01955e+09	1.12631e+09	6.05424e+08	4.12223	14.7113	27.3685	0.588452	1.69937	6.63924	FALSE	FALSE	3.22276e+09	8.42853e+08	2.87993e+08	5.1414	19.6589	57.5345	0.786354	1.27169	11.1904	FALSE	FALSE	9.44806	8.90588	8.36515	5.90541	20.5795	71.4759	0.823179	1.2148	12.1035	FALSE	FALSE
DW	d5-N-EtFOSAA	590.022	50	0.0847427	1	5.63425e+07	6.64866e+08	2.2061	44.7026	50.2437	56.4906	1.00487	1.00487	1.2637	FALSE	FALSE	4.01955e+09	1.12631e+09	6.05424e+08	8.27039	29.5152	54.9091	0.590303	1.69405	6.63924	FALSE	FALSE	3.22276e+09	8.42853e+08	2.87993e+08	10.3151	39.4414	115.431	0.788828	1.2677	11.1904	FALSE	FALSE	9.44806	8.90588	8.36515	11.848	41.2884	143.402	0.825769	1.21099	12.1035	FALSE	FALSE
DW	d5-N-EtFOSAA	590.022	50	0.0847427	2	5.7376e+07	6.77062e+08	2.2061	45.6298	51.2495	57.5812	1.02499	1.02499	1.26192	FALSE	FALSE	4.01955e+09	1.12631e+09	6.05424e+08	8.4221	30.0566	55.9164	0.601132	1.66353	6.63924	FALSE	FALSE	3.22276e+09	8.42853e+08	2.87993e+08	10.5044	40.1649	117.548	0.803298	1.24487	11.1904	FALSE	FALSE	9.44806	8.90588	8.36515	12.0653	42.0458	146.032	0.840917	1.18918	12.1035	FALSE	FALSE
DW	d5-N-EtFOSAA	590.022	50	0.0847427	3	5.71937e+07	6.7491e+08	2.2061	45.4627	51.0719	57.3929	1.02144	1.02144	1.26242	FALSE	FALSE	4.01955e+09	1.12631e+09	6.05424e+08	8.39534	29.9611	55.7387	0.599221	1.66883	6.63924	FALSE	FALSE	3.22276e+09	8.42853e+08	2.87993e+08	10.471	40.0373	117.175	0.800745	1.24884	11.1904	FALSE	FALSE	9.44806	8.90588	8.36515	12.027	41.9122	145.568	0.838245	1.19297	12.1035	FALSE	FALSE
DW	d5-N-EtFOSAA	590.022	100	0.169485	1	1.09207e+08	6.44345e+08	2.2061	87.7998	98.8293	111.35	0.988293	1.01185	1.26823	FALSE	FALSE	4.01955e+09	1.12631e+09	6.05424e+08	16.0302	57.2083	106.429	0.572083	1.748	6.63924	FALSE	FALSE	3.22276e+09	8.42853e+08	2.87993e+08	19.9935	76.4481	223.736	0.764481	1.30808	11.1904	FALSE	FALSE	9.44806	8.90588	8.36515	22.9646	80.0282	277.951	0.800282	1.24956	12.1035	FALSE	FALSE
DW	d5-N-EtFOSAA	590.022	100	0.169485	2	1.10349e+08	6.51081e+08	2.2061	88.8124	99.9955	112.695	0.999955	1.00004	1.26892	FALSE	FALSE	4.01955e+09	1.12631e+09	6.05424e+08	16.1979	57.8065	107.541	0.578065	1.72991	6.63924	FALSE	FALSE	3.22276e+09	8.42853e+08	2.87993e+08	20.2026	77.2474	226.076	0.772474	1.29454	11.1904	FALSE	FALSE	9.44806	8.90588	8.36515	23.2047	80.8649	280.857	0.808649	1.23663	12.1035	FALSE	FALSE
DW	d5-N-EtFOSAA	590.022	100	0.169485	3	1.11315e+08	6.56784e+08	2.2061	89.695	100.985	113.806	1.00985	1.00985	1.26881	FALSE	FALSE	4.01955e+09	1.12631e+09	6.05424e+08	16.3397	58.3128	108.483	0.583128	1.71489	6.63924	FALSE	FALSE	3.22276e+09	8.42853e+08	2.87993e+08	20.3795	77.924	228.056	0.77924	1.2833	11.1904	FALSE	FALSE	9.44806	8.90588	8.36515	23.4079	81.5732	283.317	0.815732	1.22589	12.1035	FALSE	FALSE
DW	d5-N-EtFOSAA	590.022	250	0.423713	1	2.37701e+08	5.60995e+08	2.2061	195.671	213.564	233.307	0.854256	1.17061	1.19235	FALSE	TRUE	4.01955e+09	1.12631e+09	6.05424e+08	34.8916	124.52	231.654	0.498081	2.0077	6.63924	FALSE	TRUE	3.22276e+09	8.42853e+08	2.87993e+08	43.5182	166.398	486.987	0.665591	1.50242	11.1904	FALSE	FALSE	9.44806	8.90588	8.36515	49.9849	174.19	604.991	0.696761	1.43521	12.1035	FALSE	FALSE
DW	d5-N-EtFOSAA	590.022	250	0.423713	2	2.88533e+08	6.80963e+08	2.2061	241.804	271.827	306.128	1.08731	1.08731	1.26602	FALSE	FALSE	4.01955e+09	1.12631e+09	6.05424e+08	42.3532	151.149	281.193	0.604595	1.654	6.63924	FALSE	FALSE	3.22276e+09	8.42853e+08	2.87993e+08	52.8245	201.982	591.129	0.807927	1.23774	11.1904	FALSE	FALSE	9.44806	8.90588	8.36515	60.6742	211.441	734.368	0.845762	1.18237	12.1035	FALSE	FALSE
DW	d5-N-EtFOSAA	590.022	250	0.423713	3	2.86485e+08	6.76128e+08	2.2061	239.238	269.391	303.906	1.07756	1.07756	1.27031	FALSE	FALSE	4.01955e+09	1.12631e+09	6.05424e+08	42.0524	150.076	279.196	0.600303	1.66583	6.63924	FALSE	FALSE	3.22276e+09	8.42853e+08	2.87993e+08	52.4494	200.548	586.931	0.80219	1.24659	11.1904	FALSE	FALSE	9.44806	8.90588	8.36515	60.2434	209.939	729.153	0.839757	1.19082	12.1035	FALSE	FALSE
DW	M8FOSA	506.98	5	0.00986232	1	1.27224e+07	1.29e+09	2.6443	4.58914	5.20926	5.90203	1.04185	1.04185	1.28609	FALSE	FALSE	4.02643e+09	6.80963e+08	5.99443e+08	1.60191	9.47185	10.76	1.89437	1.89437	6.71696	FALSE	FALSE	3.22569e+09	8.03126e+08	2.85848e+08	1.99956	8.03109	22.5644	1.60622	1.60622	11.2846	FALSE	FALSE	9.74135	9.2038	8.66745	1.17007	4.03419	13.8709	0.806838	1.23941	11.8548	FALSE	FALSE
DW	M8FOSA	506.98	5	0.00986232	2	1.21188e+07	1.2288e+09	2.6443	4.30341	4.8972	5.56173	0.979439	1.02099	1.2924	FALSE	FALSE	4.02643e+09	6.80963e+08	5.99443e+08	1.52592	9.02253	10.2495	1.80451	1.80451	6.71696	FALSE	FALSE	3.22569e+09	8.03126e+08	2.85848e+08	1.90471	7.65012	21.494	1.53002	1.53002	11.2846	FALSE	FALSE	9.74135	9.2038	8.66745	1.11456	3.84282	13.2129	0.768564	1.30113	11.8548	FALSE	FALSE
DW	M8FOSA	506.98	5	0.00986232	3	1.28007e+07	1.29794e+09	2.6443	4.62946	5.24991	5.94249	1.04998	1.04998	1.28362	FALSE	FALSE	4.02643e+09	6.80963e+08	5.99443e+08	1.61178	9.53019	10.8262	1.90604	1.90604	6.71696	FALSE	FALSE	3.22569e+09	8.03126e+08	2.85848e+08	2.01188	8.08056	22.7034	1.61611	1.61611	11.2846	FALSE	FALSE	9.74135	9.2038	8.66745	1.17727	4.05904	13.9563	0.811807	1.23182	11.8548	FALSE	FALSE
DW	M8FOSA	506.98	10	0.0197246	1	2.37659e+07	1.20488e+09	2.6443	8.82956	9.99522	11.3014	0.999522	1.00048	1.27996	FALSE	FALSE	4.02643e+09	6.80963e+08	5.99443e+08	2.99244	17.6938	20.1001	1.76938	1.76938	6.71696	FALSE	FALSE	3.22569e+09	8.03126e+08	2.85848e+08	3.73527	15.0024	42.1512	1.50024	1.50024	11.2846	FALSE	FALSE	9.74135	9.2038	8.66745	2.18573	7.53603	25.9114	0.753603	1.32696	11.8548	FALSE	FALSE
DW	M8FOSA	506.98	10	0.0197246	2	2.4294e+07	1.23166e+09	2.6443	9.06989	10.2564	11.585	1.02564	1.02564	1.27731	FALSE	FALSE	4.02643e+09	6.80963e+08	5.99443e+08	3.05893	18.087	20.5467	1.8087	1.8087	6.71696	FALSE	FALSE	3.22569e+09	8.03126e+08	2.85848e+08	3.81827	15.3358	43.0878	1.53358	1.53358	11.2846	FALSE	FALSE	9.74135	9.2038	8.66745	2.2343	7.70348	26.4872	0.770348	1.29811	11.8548	FALSE	FALSE
DW	M8FOSA	506.98	10	0.0197246	3	2.39037e+07	1.21187e+09	2.6443	8.89079	10.0634	11.3772	1.00634	1.00634	1.27967	FALSE	FALSE	4.02643e+09	6.80963e+08	5.99443e+08	3.00979	17.7964	20.2166	1.77964	1.77964	6.71696	FALSE	FALSE	3.22569e+09	8.03126e+08	2.85848e+08	3.75693	15.0894	42.3956	1.50894	1.50894	11.2846	FALSE	FALSE	9.74135	9.2038	8.66745	2.19841	7.57974	26.0617	0.757974	1.31931	11.8548	FALSE	FALSE
DW	M8FOSA	506.98	25	0.0493116	1	5.4655e+07	1.10836e+09	2.6443	21.306	23.9875	26.9982	0.959501	1.04221	1.26716	FALSE	FALSE	4.02643e+09	6.80963e+08	5.99443e+08	6.88178	40.6909	46.2246	1.62764	1.62764	6.71696	FALSE	FALSE	3.22569e+09	8.03126e+08	2.85848e+08	8.59009	34.5014	96.9361	1.38006	1.38006	11.2846	FALSE	FALSE	9.74135	9.2038	8.66745	5.02658	17.3308	59.5891	0.693232	1.44252	11.8548	FALSE	FALSE
DW	M8FOSA	506.98	25	0.0493116	2	5.46637e+07	1.10854e+09	2.6443	21.3094	23.9918	27.0035	0.959672	1.04202	1.26721	FALSE	FALSE	4.02643e+09	6.80963e+08	5.99443e+08	6.88287	40.6974	46.2319	1.62789	1.62789	6.71696	FALSE	FALSE	3.22569e+09	8.03126e+08	2.85848e+08	8.59145	34.5069	96.9515	1.38028	1.38028	11.2846	FALSE	FALSE	9.74135	9.2038	8.66745	5.02738	17.3336	59.5986	0.693342	1.44229	11.8548	FALSE	FALSE
DW	M8FOSA	506.98	25	0.0493116	3	5.18739e+07	1.05196e+09	2.6443	20.316	22.6233	25.1853	0.904933	1.10505	1.23968	FALSE	FALSE	4.02643e+09	6.80963e+08	5.99443e+08	6.53161	38.6204	43.8725	1.54482	1.54482	6.71696	FALSE	FALSE	3.22569e+09	8.03126e+08	2.85848e+08	8.15299	32.7459	92.0036	1.30983	1.30983	11.2846	FALSE	FALSE	9.74135	9.2038	8.66745	4.77081	16.4489	56.557	0.657958	1.51985	11.8548	FALSE	FALSE
DW	M8FOSA	506.98	50	0.0986232	1	1.1103e+08	1.1258e+09	2.6443	45.0562	50.8062	57.3109	1.01612	1.01612	1.27199	FALSE	FALSE	4.02643e+09	6.80963e+08	5.99443e+08	13.9801	82.6623	93.9039	1.65325	1.65325	6.71696	FALSE	FALSE	3.22569e+09	8.03126e+08	2.85848e+08	17.4505	70.0886	196.923	1.40177	1.40177	11.2846	FALSE	FALSE	9.74135	9.2038	8.66745	10.2114	35.207	121.054	0.70414	1.42017	11.8548	FALSE	FALSE
DW	M8FOSA	506.98	50	0.0986232	2	1.1108e+08	1.12631e+09	2.6443	45.08	50.8321	57.339	1.01664	1.01664	1.27194	FALSE	FALSE	4.02643e+09	6.80963e+08	5.99443e+08	13.9865	82.6999	93.9466	1.654	1.654	6.71696	FALSE	FALSE	3.22569e+09	8.03126e+08	2.85848e+08	17.4584	70.1205	197.012	1.40241	1.40241	11.2846	FALSE	FALSE	9.74135	9.2038	8.66745	10.216	35.223	121.109	0.70446	1.41953	11.8548	FALSE	FALSE
DW	M8FOSA	506.98	50	0.0986232	3	1.08824e+08	1.10343e+09	2.6443	44.044	49.6753	56.046	0.993506	1.00654	1.2725	FALSE	FALSE	4.02643e+09	6.80963e+08	5.99443e+08	13.7024	81.0201	92.0383	1.6204	1.6204	6.71696	FALSE	FALSE	3.22569e+09	8.03126e+08	2.85848e+08	17.1038	68.6961	193.01	1.37392	1.37392	11.2846	FALSE	FALSE	9.74135	9.2038	8.66745	10.0085	34.5075	118.649	0.690151	1.44896	11.8548	FALSE	FALSE
DW	M8FOSA	506.98	100	0.197246	1	2.14583e+08	1.08789e+09	2.6443	90.1385	101.824	115.144	1.01824	1.01824	1.27741	FALSE	FALSE	4.02643e+09	6.80963e+08	5.99443e+08	27.0188	159.758	181.484	1.59758	1.59758	6.71696	FALSE	FALSE	3.22569e+09	8.03126e+08	2.85848e+08	33.7259	135.457	380.584	1.35457	1.35457	11.2846	FALSE	FALSE	9.74135	9.2038	8.66745	19.735	68.0431	233.955	0.680431	1.46966	11.8548	FALSE	FALSE
DW	M8FOSA	506.98	100	0.197246	2	2.1513e+08	1.09067e+09	2.6443	90.4165	102.126	115.472	1.02126	1.02126	1.27711	FALSE	FALSE	4.02643e+09	6.80963e+08	5.99443e+08	27.0877	160.165	181.947	1.60165	1.60165	6.71696	FALSE	FALSE	3.22569e+09	8.03126e+08	2.85848e+08	33.8118	135.803	381.555	1.35803	1.35803	11.2846	FALSE	FALSE	9.74135	9.2038	8.66745	19.7854	68.2165	234.551	0.682165	1.46592	11.8548	FALSE	FALSE
DW	M8FOSA	506.98	100	0.197246	3	2.13206e+08	1.08091e+09	2.6443	89.4486	101.066	114.309	1.01066	1.01066	1.27793	FALSE	FALSE	4.02643e+09	6.80963e+08	5.99443e+08	26.8455	158.733	180.32	1.58733	1.58733	6.71696	FALSE	FALSE	3.22569e+09	8.03126e+08	2.85848e+08	33.5095	134.588	378.143	1.34588	1.34588	11.2846	FALSE	FALSE	9.74135	9.2038	8.66745	19.6085	67.6066	232.454	0.676066	1.47915	11.8548	FALSE	FALSE
DW	M8FOSA	506.98	250	0.493116	1	4.45002e+08	9.0243e+08	2.6443	194.599	213.37	234.189	0.853479	1.17168	1.20344	FALSE	TRUE	4.02643e+09	6.80963e+08	5.99443e+08	56.0316	331.306	376.362	1.32523	1.32523	6.71696	FALSE	FALSE	3.22569e+09	8.03126e+08	2.85848e+08	69.9407	280.912	789.256	1.12365	1.12365	11.2846	FALSE	FALSE	9.74135	9.2038	8.66745	40.9266	141.108	485.176	0.564431	1.77169	11.8548	FALSE	FALSE
DW	M8FOSA	506.98	250	0.493116	2	5.46487e+08	1.10823e+09	2.6443	247.195	277.689	312.505	1.11076	1.11076	1.26421	FALSE	FALSE	4.02643e+09	6.80963e+08	5.99443e+08	68.8099	406.862	462.193	1.62745	1.62745	6.71696	FALSE	FALSE	3.22569e+09	8.03126e+08	2.85848e+08	85.891	344.975	969.25	1.3799	1.3799	11.2846	FALSE	FALSE	9.74135	9.2038	8.66745	50.2601	173.288	595.823	0.693153	1.44268	11.8548	FALSE	FALSE
DW	M8FOSA	506.98	250	0.493116	3	5.34621e+08	1.08417e+09	2.6443	238.782	269.867	305.597	1.07947	1.07947	1.27981	FALSE	FALSE	4.02643e+09	6.80963e+08	5.99443e+08	67.3158	398.028	452.157	1.59211	1.59211	6.71696	FALSE	FALSE	3.22569e+09	8.03126e+08	2.85848e+08	84.0261	337.484	948.204	1.34994	1.34994	11.2846	FALSE	FALSE	9.74135	9.2038	8.66745	49.1687	169.525	582.886	0.678102	1.4747	11.8548	FALSE	FALSE
DW	M2PFTeDA	715.961	5	0.00698362	1	7.39375e+06	1.05873e+09	2.41018	4.19056	4.77359	5.42655	0.954717	1.04743	1.29495	FALSE	FALSE	3.13954e+09	9.43636e+08	8.56699e+08	1.68612	5.60983	6.17911	1.12197	1.12197	3.66469	FALSE	FALSE	3.22472e+09	8.03126e+08	2.88776e+08	1.64158	6.59129	18.3313	1.31826	1.31826	11.1668	FALSE	FALSE	9.57245	9.02927	8.48817	1.41678	4.94866	17.2022	0.989733	1.01037	12.1418	FALSE	FALSE
DW	M2PFTeDA	715.961	5	0.00698362	2	8.38069e+06	1.20005e+09	2.41018	4.96018	5.56938	6.24378	1.11388	1.11388	1.25878	FALSE	FALSE	3.13954e+09	9.43636e+08	8.56699e+08	1.91119	6.35864	7.00392	1.27173	1.27173	3.66469	FALSE	FALSE	3.22472e+09	8.03126e+08	2.88776e+08	1.8607	7.47111	20.7782	1.49422	1.49422	11.1668	FALSE	FALSE	9.57245	9.02927	8.48817	1.6059	5.60922	19.4984	1.12184	1.12184	12.1418	FALSE	FALSE
DW	M2PFTeDA	715.961	5	0.00698362	3	7.79008e+06	1.11548e+09	2.41018	4.46539	5.09218	5.79509	1.01844	1.01844	1.29778	FALSE	FALSE	3.13954e+09	9.43636e+08	8.56699e+08	1.7765	5.91054	6.51034	1.18211	1.18211	3.66469	FALSE	FALSE	3.22472e+09	8.03126e+08	2.88776e+08	1.72958	6.94461	19.3139	1.38892	1.38892	11.1668	FALSE	FALSE	9.57245	9.02927	8.48817	1.49273	5.21393	18.1243	1.04279	1.04279	12.1418	FALSE	FALSE
DW	M2PFTeDA	715.961	10	0.0139672	1	1.44156e+07	1.0321e+09	2.41018	8.37375	9.47396	10.7058	0.947396	1.05552	1.27849	FALSE	FALSE	3.13954e+09	9.43636e+08	8.56699e+08	3.28744	10.9375	12.0474	1.09375	1.09375	3.66469	FALSE	FALSE	3.22472e+09	8.03126e+08	2.88776e+08	3.2006	12.8511	35.7406	1.28511	1.28511	11.1668	FALSE	FALSE	9.57245	9.02927	8.48817	2.76231	9.64843	33.5392	0.964843	1.03644	12.1418	FALSE	FALSE
DW	M2PFTeDA	715.961	10	0.0139672	2	1.55757e+07	1.11516e+09	2.41018	9.13567	10.349	11.7097	1.0349	1.0349	1.28176	FALSE	FALSE	3.13954e+09	9.43636e+08	8.56699e+08	3.55199	11.8177	13.0169	1.18177	1.18177	3.66469	FALSE	FALSE	3.22472e+09	8.03126e+08	2.88776e+08	3.45816	13.8852	38.6167	1.38852	1.38852	11.1668	FALSE	FALSE	9.57245	9.02927	8.48817	2.9846	10.4249	36.2383	1.04249	1.04249	12.1418	FALSE	FALSE
DW	M2PFTeDA	715.961	10	0.0139672	3	1.48615e+07	1.06402e+09	2.41018	8.64644	9.80982	11.116	0.980982	1.01939	1.28561	FALSE	FALSE	3.13954e+09	9.43636e+08	8.56699e+08	3.38911	11.2758	12.4201	1.12758	1.12758	3.66469	FALSE	FALSE	3.22472e+09	8.03126e+08	2.88776e+08	3.29959	13.2485	36.846	1.32485	1.32485	11.1668	FALSE	FALSE	9.57245	9.02927	8.48817	2.84774	9.94684	34.5766	0.994684	1.00534	12.1418	FALSE	FALSE
DW	M2PFTeDA	715.961	25	0.0349181	1	3.60072e+07	1.03119e+09	2.41018	21.4761	24.2624	27.4016	0.970498	1.0304	1.27591	FALSE	FALSE	3.13954e+09	9.43636e+08	8.56699e+08	8.21133	27.3196	30.092	1.09278	1.09278	3.66469	FALSE	FALSE	3.22472e+09	8.03126e+08	2.88776e+08	7.99443	32.0993	89.2725	1.28397	1.28397	11.1668	FALSE	FALSE	9.57245	9.02927	8.48817	6.89966	24.0998	83.774	0.963991	1.03735	12.1418	FALSE	FALSE
DW	M2PFTeDA	715.961	25	0.0349181	2	3.47693e+07	9.95739e+08	2.41018	20.7702	23.3565	26.2564	0.934261	1.07036	1.26414	FALSE	FALSE	3.13954e+09	9.43636e+08	8.56699e+08	7.92903	26.3804	29.0575	1.05522	1.05522	3.66469	FALSE	FALSE	3.22472e+09	8.03126e+08	2.88776e+08	7.71958	30.9957	86.2033	1.23983	1.23983	11.1668	FALSE	FALSE	9.57245	9.02927	8.48817	6.66246	23.2712	80.8939	0.930849	1.07429	12.1418	FALSE	FALSE
DW	M2PFTeDA	715.961	25	0.0349181	3	3.44321e+07	9.86083e+08	2.41018	20.5923	23.1101	25.9275	0.924405	1.08178	1.25909	FALSE	FALSE	3.13954e+09	9.43636e+08	8.56699e+08	7.85214	26.1245	28.7757	1.04498	1.04498	3.66469	FALSE	FALSE	3.22472e+09	8.03126e+08	2.88776e+08	7.64472	30.6951	85.3673	1.22781	1.22781	11.1668	FALSE	FALSE	9.57245	9.02927	8.48817	6.59784	23.0455	80.1094	0.921822	1.08481	12.1418	FALSE	FALSE
DW	M2PFTeDA	715.961	50	0.0698362	1	7.46251e+07	1.06857e+09	2.41018	45.4106	51.3048	57.9863	1.0261	1.0261	1.27693	FALSE	FALSE	3.13954e+09	9.43636e+08	8.56699e+08	17.018	56.62	62.3658	1.1324	1.1324	3.66469	FALSE	FALSE	3.22472e+09	8.03126e+08	2.88776e+08	16.5685	66.5259	185.018	1.33052	1.33052	11.1668	FALSE	FALSE	9.57245	9.02927	8.48817	14.2996	49.9469	173.622	0.998938	1.00106	12.1418	FALSE	FALSE
DW	M2PFTeDA	715.961	50	0.0698362	2	7.48195e+07	1.07136e+09	2.41018	45.5478	51.4503	58.1403	1.02901	1.02901	1.27647	FALSE	FALSE	3.13954e+09	9.43636e+08	8.56699e+08	17.0624	56.7675	62.5283	1.13535	1.13535	3.66469	FALSE	FALSE	3.22472e+09	8.03126e+08	2.88776e+08	16.6116	66.6992	185.5	1.33398	1.33398	11.1668	FALSE	FALSE	9.57245	9.02927	8.48817	14.3368	50.077	174.074	1.00154	1.00154	12.1418	FALSE	FALSE
DW	M2PFTeDA	715.961	50	0.0698362	3	7.53878e+07	1.07949e+09	2.41018	45.9545	51.8762	58.5837	1.03752	1.03752	1.27482	FALSE	FALSE	3.13954e+09	9.43636e+08	8.56699e+08	17.1919	57.1986	63.0032	1.14397	1.14397	3.66469	FALSE	FALSE	3.22472e+09	8.03126e+08	2.88776e+08	16.7378	67.2058	186.908	1.34412	1.34412	11.1668	FALSE	FALSE	9.57245	9.02927	8.48817	14.4457	50.4573	175.396	1.00915	1.00915	12.1418	FALSE	FALSE
DW	M2PFTeDA	715.961	100	0.139672	1	1.48318e+08	1.0619e+09	2.41018	91.7599	103.792	117.528	1.03792	1.03792	1.28082	FALSE	FALSE	3.13954e+09	9.43636e+08	8.56699e+08	33.8234	112.533	123.953	1.12533	1.12533	3.66469	FALSE	FALSE	3.22472e+09	8.03126e+08	2.88776e+08	32.93	132.221	367.724	1.32221	1.32221	11.1668	FALSE	FALSE	9.57245	9.02927	8.48817	28.4205	99.2698	345.075	0.992698	1.00736	12.1418	FALSE	FALSE
DW	M2PFTeDA	715.961	100	0.139672	2	1.48547e+08	1.06354e+09	2.41018	91.9336	103.973	117.716	1.03973	1.03973	1.28044	FALSE	FALSE	3.13954e+09	9.43636e+08	8.56699e+08	33.8757	112.706	124.144	1.12706	1.12706	3.66469	FALSE	FALSE	3.22472e+09	8.03126e+08	2.88776e+08	32.9808	132.425	368.292	1.32425	1.32425	11.1668	FALSE	FALSE	9.57245	9.02927	8.48817	28.4644	99.4231	345.608	0.994231	1.0058	12.1418	FALSE	FALSE
DW	M2PFTeDA	715.961	100	0.139672	3	1.48485e+08	1.06309e+09	2.41018	91.8862	103.924	117.665	1.03924	1.03924	1.28055	FALSE	FALSE	3.13954e+09	9.43636e+08	8.56699e+08	33.8614	112.659	124.092	1.12659	1.12659	3.66469	FALSE	FALSE	3.22472e+09	8.03126e+08	2.88776e+08	32.967	132.369	368.137	1.32369	1.32369	11.1668	FALSE	FALSE	9.57245	9.02927	8.48817	28.4525	99.3813	345.463	0.993813	1.00623	12.1418	FALSE	FALSE
DW	M2PFTeDA	715.961	250	0.349181	1	3.11957e+08	8.93397e+08	2.41018	195.065	215.72	238.854	0.862881	1.15891	1.22448	FALSE	TRUE	3.13954e+09	9.43636e+08	8.56699e+08	71.1408	236.69	260.709	0.94676	1.05623	3.66469	FALSE	FALSE	3.22472e+09	8.03126e+08	2.88776e+08	69.2616	278.1	773.433	1.1124	1.1124	11.1668	FALSE	FALSE	9.57245	9.02927	8.48817	59.7768	208.794	725.796	0.835176	1.19735	12.1418	FALSE	FALSE
DW	M2PFTeDA	715.961	250	0.349181	2	3.62281e+08	1.03752e+09	2.41018	228.123	259.691	296.272	1.03876	1.03876	1.29874	FALSE	FALSE	3.13954e+09	9.43636e+08	8.56699e+08	82.617	274.872	302.766	1.09949	1.09949	3.66469	FALSE	FALSE	3.22472e+09	8.03126e+08	2.88776e+08	80.4346	322.962	898.2	1.29185	1.29185	11.1668	FALSE	FALSE	9.57245	9.02927	8.48817	69.4198	242.476	842.878	0.969903	1.03103	12.1418	FALSE	FALSE
DW	M2PFTeDA	715.961	250	0.349181	3	3.63781e+08	1.04181e+09	2.41018	229.402	261.042	297.691	1.04417	1.04417	1.29768	FALSE	FALSE	3.13954e+09	9.43636e+08	8.56699e+08	82.9591	276.01	304.019	1.10404	1.10404	3.66469	FALSE	FALSE	3.22472e+09	8.03126e+08	2.88776e+08	80.7676	324.299	901.919	1.2972	1.2972	11.1668	FALSE	FALSE	9.57245	9.02927	8.48817	69.7072	243.48	846.368	0.973919	1.02678	12.1418	FALSE	FALSE
DW	M2-4:2 FTS	329.988	4.69	0.0142126	1	6.84251e+06	4.81439e+08	1.79624	4.89821	5.5842	6.35409	1.19066	1.19066	1.29723	TRUE	FALSE	2.34165e+09	6.16928e+08	4.17894e+08	0.964254	3.65999	5.40315	0.780381	1.28142	5.60345	FALSE	FALSE	3.22971e+09	8.42853e+08	2.96702e+08	0.699118	2.67894	7.61015	0.571202	1.7507	10.8854	FALSE	FALSE	9.21746	8.68909	8.16629	1.36852	4.61984	15.3964	0.98504	1.01519	11.2504	FALSE	FALSE
DW	M2-4:2 FTS	329.988	4.69	0.0142126	2	5.65687e+06	3.98017e+08	1.79624	3.73649	4.40115	5.16719	0.938411	1.06563	1.3829	FALSE	FALSE	2.34165e+09	6.16928e+08	4.17894e+08	0.797173	3.0258	4.46692	0.64516	1.55	5.60345	FALSE	TRUE	3.22971e+09	8.42853e+08	2.96702e+08	0.577978	2.21474	6.2915	0.472226	2.11763	10.8854	FALSE	FALSE	9.21746	8.68909	8.16629	1.13139	3.81933	12.7286	0.814356	1.22796	11.2504	FALSE	FALSE
DW	M2-4:2 FTS	329.988	4.69	0.0142126	3	5.89178e+06	4.14545e+08	1.79624	3.92363	4.63369	5.45422	0.987993	1.01215	1.3901	FALSE	FALSE	2.34165e+09	6.16928e+08	4.17894e+08	0.830276	3.15145	4.65241	0.671951	1.4882	5.60345	FALSE	TRUE	3.22971e+09	8.42853e+08	2.96702e+08	0.60198	2.30671	6.55276	0.491836	2.0332	10.8854	FALSE	FALSE	9.21746	8.68909	8.16629	1.17837	3.97793	13.2572	0.848174	1.179	11.2504	FALSE	FALSE
DW	M2-6:2 FTS	429.982	4.755	0.0110586	1	5.06294e+06	4.57828e+08	1.98041	4.16777	4.62569	5.1272	0.972807	1.02795	1.2302	FALSE	FALSE	3.03653e+09	6.18509e+08	3.75483e+08	0.716926	3.51971	5.79779	0.740212	1.35097	8.08701	FALSE	FALSE	3.22243e+09	8.43368e+08	2.89207e+08	0.675568	2.58128	7.52737	0.542857	1.84211	11.1423	FALSE	FALSE	9.30063	8.78179	8.26536	1.0895	3.59801	11.8167	0.75668	1.32156	10.846	FALSE	FALSE
DW	M2-6:2 FTS	429.982	4.755	0.0110586	2	5.20545e+06	4.70714e+08	1.98041	4.31337	4.79011	5.31257	1.00738	1.00738	1.23165	FALSE	FALSE	3.03653e+09	6.18509e+08	3.75483e+08	0.737106	3.61878	5.96099	0.761047	1.31398	8.08701	FALSE	FALSE	3.22243e+09	8.43368e+08	2.89207e+08	0.694584	2.65394	7.73925	0.558137	1.79168	11.1423	FALSE	FALSE	9.30063	8.78179	8.26536	1.12017	3.69929	12.1493	0.777979	1.28538	10.846	FALSE	FALSE
DW	M2-6:2 FTS	429.982	4.755	0.0110586	3	5.33575e+06	4.82497e+08	1.98041	4.46028	4.94085	5.46645	1.03909	1.03909	1.22559	FALSE	FALSE	3.03653e+09	6.18509e+08	3.75483e+08	0.755557	3.70936	6.1102	0.780097	1.28189	8.08701	FALSE	FALSE	3.22243e+09	8.43368e+08	2.89207e+08	0.711971	2.72037	7.93298	0.572108	1.74792	11.1423	FALSE	FALSE	9.30063	8.78179	8.26536	1.14821	3.79189	12.4534	0.797453	1.25399	10.846	FALSE	FALSE
DW	M2-8:2 FTS	529.976	4.8	0.00905702	1	6.07658e+06	6.70925e+08	1.78056	4.40264	5.10317	5.90018	1.06316	1.06316	1.34015	FALSE	FALSE	4.01955e+09	4.51636e+08	3.69736e+08	0.801193	7.13061	8.71011	1.48554	1.48554	10.8714	FALSE	FALSE	3.22186e+09	8.43368e+08	2.89333e+08	0.999558	3.81854	11.1306	0.79553	1.25702	11.1355	FALSE	FALSE	9.16345	8.63659	8.11282	2.21036	7.43571	24.837	1.54911	1.54911	11.2366	FALSE	FALSE
DW	M2-8:2 FTS	529.976	4.8	0.00905702	2	5.9317e+06	6.54929e+08	1.78056	4.25899	4.9536	5.74603	1.032	1.032	1.34915	FALSE	FALSE	4.01955e+09	4.51636e+08	3.69736e+08	0.782091	6.9606	8.50245	1.45013	1.45013	10.8714	FALSE	FALSE	3.22186e+09	8.43368e+08	2.89333e+08	0.975728	3.72751	10.8652	0.776564	1.28772	11.1355	FALSE	FALSE	9.16345	8.63659	8.11282	2.15766	7.25843	24.2449	1.51217	1.51217	11.2366	FALSE	FALSE
DW	M2-8:2 FTS	529.976	4.8	0.00905702	3	5.69256e+06	6.28524e+08	1.78056	4.04082	4.70738	5.46861	0.980704	1.01968	1.35334	FALSE	FALSE	4.01955e+09	4.51636e+08	3.69736e+08	0.750559	6.67997	8.15966	1.39166	1.39166	10.8714	FALSE	FALSE	3.22186e+09	8.43368e+08	2.89333e+08	0.936389	3.57722	10.4271	0.745255	1.34182	11.1355	FALSE	FALSE	9.16345	8.63659	8.11282	2.07067	6.96579	23.2674	1.45121	1.45121	11.2366	FALSE	FALSE
DW	M2-4:2 FTS	329.988	9.38	0.0284253	1	1.12584e+07	3.96071e+08	1.79624	7.76204	9.09593	10.6382	0.969716	1.03123	1.37054	FALSE	FALSE	2.34165e+09	6.16928e+08	4.17894e+08	1.58655	6.02201	8.89016	0.642006	1.55762	5.60345	FALSE	TRUE	3.22971e+09	8.42853e+08	2.96702e+08	1.1503	4.40782	12.5215	0.469917	2.12803	10.8854	FALSE	FALSE	9.21746	8.68909	8.16629	2.25171	7.60131	25.3328	0.810375	1.234	11.2504	FALSE	FALSE
DW	M2-4:2 FTS	329.988	9.38	0.0284253	2	1.08354e+07	3.81191e+08	1.79624	7.45316	8.69812	10.1316	0.927305	1.07839	1.35937	FALSE	FALSE	2.34165e+09	6.16928e+08	4.17894e+08	1.52694	5.79577	8.55616	0.617886	1.61842	5.60345	FALSE	TRUE	3.22971e+09	8.42853e+08	2.96702e+08	1.10709	4.24223	12.0511	0.452263	2.2111	10.8854	FALSE	FALSE	9.21746	8.68909	8.16629	2.16711	7.31574	24.381	0.779929	1.28217	11.2504	FALSE	FALSE
DW	M2-4:2 FTS	329.988	9.38	0.0284253	3	1.15031e+07	4.0468e+08	1.79624	7.95444	9.32662	10.9143	0.994309	1.00572	1.3721	FALSE	FALSE	2.34165e+09	6.16928e+08	4.17894e+08	1.62104	6.15291	9.0834	0.655961	1.52448	5.60345	FALSE	TRUE	3.22971e+09	8.42853e+08	2.96702e+08	1.17531	4.50363	12.7936	0.480132	2.08276	10.8854	FALSE	FALSE	9.21746	8.68909	8.16629	2.30065	7.76654	25.8834	0.827989	1.20775	11.2504	FALSE	FALSE
DW	M2-6:2 FTS	429.982	9.51	0.0221172	1	1.03187e+07	4.66547e+08	1.98041	8.85606	9.77991	10.7921	1.02838	1.02838	1.21862	FALSE	FALSE	3.03653e+09	6.18509e+08	3.75483e+08	1.46116	7.17347	11.8164	0.754308	1.32572	8.08701	FALSE	FALSE	3.22243e+09	8.43368e+08	2.89207e+08	1.37687	5.26088	15.3415	0.553195	1.80768	11.1423	FALSE	FALSE	9.30063	8.78179	8.26536	2.2205	7.33307	24.0834	0.771091	1.29686	10.846	FALSE	FALSE
DW	M2-6:2 FTS	429.982	9.51	0.0221172	2	1.00262e+07	4.53321e+08	1.98041	8.55348	9.45923	10.4527	0.994662	1.00537	1.22205	FALSE	FALSE	3.03653e+09	6.18509e+08	3.75483e+08	1.41974	6.97011	11.4814	0.732925	1.3644	8.08701	FALSE	FALSE	3.22243e+09	8.43368e+08	2.89207e+08	1.33784	5.11174	14.9065	0.537513	1.86042	11.1423	FALSE	FALSE	9.30063	8.78179	8.26536	2.15755	7.12519	23.4007	0.749231	1.3347	10.846	FALSE	FALSE
DW	M2-6:2 FTS	429.982	9.51	0.0221172	3	9.98892e+06	4.51636e+08	1.98041	8.51712	9.41843	10.407	0.990371	1.00972	1.22189	FALSE	FALSE	3.03653e+09	6.18509e+08	3.75483e+08	1.41446	6.94421	11.4388	0.730201	1.36949	8.08701	FALSE	FALSE	3.22243e+09	8.43368e+08	2.89207e+08	1.33286	5.09274	14.8511	0.535515	1.86736	11.1423	FALSE	FALSE	9.30063	8.78179	8.26536	2.14953	7.09871	23.3137	0.746447	1.33968	10.846	FALSE	FALSE
DW	M2-8:2 FTS	529.976	9.6	0.018114	1	1.18032e+07	6.51605e+08	1.78056	8.68916	10.0313	11.563	1.04493	1.04493	1.33074	FALSE	FALSE	4.01955e+09	4.51636e+08	3.69736e+08	1.55624	13.8506	16.9186	1.44277	1.44277	10.8714	FALSE	FALSE	3.22186e+09	8.43368e+08	2.89333e+08	1.94155	7.41718	21.6201	0.772623	1.29429	11.1355	FALSE	FALSE	9.16345	8.63659	8.11282	4.29343	14.4432	48.2436	1.5045	1.5045	11.2366	FALSE	FALSE
DW	M2-8:2 FTS	529.976	9.6	0.018114	2	1.11389e+07	6.14933e+08	1.78056	8.11337	9.38825	10.8455	0.977942	1.02256	1.33674	FALSE	FALSE	4.01955e+09	4.51636e+08	3.69736e+08	1.46866	13.071	15.9664	1.36157	1.36157	10.8714	FALSE	FALSE	3.22186e+09	8.43368e+08	2.89333e+08	1.83228	6.99974	20.4033	0.729139	1.37148	11.1355	FALSE	FALSE	9.16345	8.63659	8.11282	4.05179	13.6303	45.5285	1.41983	1.41983	11.2366	FALSE	FALSE
DW	M2-8:2 FTS	529.976	9.6	0.018114	3	1.12037e+07	6.18509e+08	1.78056	8.16596	9.45087	10.9199	0.984466	1.01578	1.33725	FALSE	FALSE	4.01955e+09	4.51636e+08	3.69736e+08	1.4772	13.1471	16.0593	1.36949	1.36949	10.8714	FALSE	FALSE	3.22186e+09	8.43368e+08	2.89333e+08	1.84294	7.04045	20.522	0.73338	1.36355	11.1355	FALSE	FALSE	9.16345	8.63659	8.11282	4.07536	13.7096	45.7933	1.42808	1.42808	11.2366	FALSE	FALSE
DW	M2-4:2 FTS	329.988	23.45	0.0710631	1	2.74674e+07	3.86521e+08	1.79624	19.8112	23.1197	26.9678	0.985916	1.01429	1.36124	FALSE	FALSE	2.34165e+09	6.16928e+08	4.17894e+08	3.87073	14.692	21.6895	0.626525	1.5961	5.60345	FALSE	TRUE	3.22971e+09	8.42853e+08	2.96702e+08	2.80642	10.7539	30.5489	0.458586	2.18061	10.8854	FALSE	FALSE	9.21746	8.68909	8.16629	5.49354	18.5451	61.8048	0.790834	1.26449	11.2504	FALSE	FALSE
DW	M2-4:2 FTS	329.988	23.45	0.0710631	2	2.74745e+07	3.86621e+08	1.79624	19.8168	23.1264	26.9757	0.986201	1.01399	1.36126	FALSE	FALSE	2.34165e+09	6.16928e+08	4.17894e+08	3.87174	14.6958	21.6951	0.626688	1.59569	5.60345	FALSE	TRUE	3.22971e+09	8.42853e+08	2.96702e+08	2.80715	10.7566	30.5568	0.458706	2.18005	10.8854	FALSE	FALSE	9.21746	8.68909	8.16629	5.49497	18.5499	61.8209	0.79104	1.26416	11.2504	FALSE	FALSE
DW	M2-4:2 FTS	329.988	23.45	0.0710631	3	2.73372e+07	3.8469e+08	1.79624	19.7102	22.9983	26.8218	0.980739	1.01964	1.36081	FALSE	FALSE	2.34165e+09	6.16928e+08	4.17894e+08	3.8524	14.6224	21.5867	0.623557	1.6037	5.60345	FALSE	TRUE	3.22971e+09	8.42853e+08	2.96702e+08	2.79312	10.7029	30.4041	0.456414	2.19099	10.8854	FALSE	FALSE	9.21746	8.68909	8.16629	5.46751	18.4572	61.512	0.787088	1.27051	11.2504	FALSE	FALSE
DW	M2-6:2 FTS	429.982	23.775	0.055293	1	2.42697e+07	4.38928e+08	1.98041	21.5339	23.7503	26.1898	0.998959	1.00104	1.21621	FALSE	FALSE	3.03653e+09	6.18509e+08	3.75483e+08	3.43666	16.8721	27.7923	0.709655	1.40913	8.08701	FALSE	FALSE	3.22243e+09	8.43368e+08	2.89207e+08	3.2384	12.3736	36.0832	0.520447	1.92142	11.1423	FALSE	FALSE	9.30063	8.78179	8.26536	5.22262	17.2474	56.6444	0.725444	1.37847	10.846	FALSE	FALSE
DW	M2-6:2 FTS	429.982	23.775	0.055293	2	2.41636e+07	4.37009e+08	1.98041	21.4307	23.6355	26.0621	0.994131	1.0059	1.21611	FALSE	FALSE	3.03653e+09	6.18509e+08	3.75483e+08	3.42163	16.7983	27.6708	0.706552	1.41532	8.08701	FALSE	FALSE	3.22243e+09	8.43368e+08	2.89207e+08	3.22424	12.3195	35.9254	0.518171	1.92986	11.1423	FALSE	FALSE	9.30063	8.78179	8.26536	5.19978	17.172	56.3967	0.722272	1.38452	10.846	FALSE	FALSE
DW	M2-6:2 FTS	429.982	23.775	0.055293	3	2.29251e+07	4.14611e+08	1.98041	20.3489	22.299	24.4312	0.937917	1.06619	1.20062	FALSE	FALSE	3.03653e+09	6.18509e+08	3.75483e+08	3.24626	15.9373	26.2526	0.67034	1.49178	8.08701	FALSE	FALSE	3.22243e+09	8.43368e+08	2.89207e+08	3.05899	11.6881	34.0842	0.491614	2.03412	11.1423	FALSE	FALSE	9.30063	8.78179	8.26536	4.93328	16.2919	53.5063	0.685254	1.45931	10.846	FALSE	FALSE
DW	M2-8:2 FTS	529.976	24	0.0452851	1	2.69737e+07	5.95641e+08	1.78056	20.2242	23.2924	26.8147	0.970517	1.03038	1.32587	FALSE	FALSE	4.01955e+09	4.51636e+08	3.69736e+08	3.55646	31.6524	38.6638	1.31885	1.31885	10.8714	FALSE	FALSE	3.22186e+09	8.43368e+08	2.89333e+08	4.43699	16.9503	49.408	0.706265	1.4159	11.1355	FALSE	FALSE	9.16345	8.63659	8.11282	9.8117	33.0068	110.25	1.37528	1.37528	11.2366	FALSE	FALSE
DW	M2-8:2 FTS	529.976	24	0.0452851	2	2.61437e+07	5.77314e+08	1.78056	19.612	22.5111	25.8274	0.937964	1.06614	1.31691	FALSE	FALSE	4.01955e+09	4.51636e+08	3.69736e+08	3.44703	30.6786	37.4742	1.27827	1.27827	10.8714	FALSE	FALSE	3.22186e+09	8.43368e+08	2.89333e+08	4.30048	16.4288	47.8878	0.684534	1.46085	11.1355	FALSE	FALSE	9.16345	8.63659	8.11282	9.50981	31.9912	106.858	1.33297	1.33297	11.2366	FALSE	FALSE
DW	M2-8:2 FTS	529.976	24	0.0452851	3	2.61687e+07	5.77865e+08	1.78056	19.6297	22.5346	25.858	0.938943	1.06503	1.31729	FALSE	FALSE	4.01955e+09	4.51636e+08	3.69736e+08	3.45032	30.7078	37.51	1.27949	1.27949	10.8714	FALSE	FALSE	3.22186e+09	8.43368e+08	2.89333e+08	4.30458	16.4445	47.9335	0.685188	1.45945	11.1355	FALSE	FALSE	9.16345	8.63659	8.11282	9.51889	32.0217	106.96	1.33424	1.33424	11.2366	FALSE	FALSE
DW	M2-4:2 FTS	329.988	46.9	0.142126	1	5.48591e+07	3.85988e+08	1.79624	40.8629	47.6657	55.6344	1.01633	1.01633	1.36149	FALSE	FALSE	2.34165e+09	6.16928e+08	4.17894e+08	7.7308	29.3436	43.3192	0.625662	1.59831	5.60345	FALSE	TRUE	3.22971e+09	8.42853e+08	2.96702e+08	5.60511	21.4781	61.0136	0.457955	2.18362	10.8854	FALSE	FALSE	9.21746	8.68909	8.16629	10.9719	37.039	123.439	0.789745	1.26623	11.2504	FALSE	FALSE
DW	M2-4:2 FTS	329.988	46.9	0.142126	2	5.45478e+07	3.83798e+08	1.79624	40.5997	47.3655	55.2914	1.00992	1.00992	1.36187	FALSE	FALSE	2.34165e+09	6.16928e+08	4.17894e+08	7.68694	29.1771	43.0734	0.622112	1.60743	5.60345	FALSE	TRUE	3.22971e+09	8.42853e+08	2.96702e+08	5.5733	21.3562	60.6674	0.455356	2.19608	10.8854	FALSE	FALSE	9.21746	8.68909	8.16629	10.9097	36.8289	122.739	0.785264	1.27346	11.2504	FALSE	FALSE
DW	M2-4:2 FTS	329.988	46.9	0.142126	3	5.55076e+07	3.90552e+08	1.79624	41.4222	48.292	56.3358	1.02968	1.02968	1.36004	FALSE	FALSE	2.34165e+09	6.16928e+08	4.17894e+08	7.8222	29.6905	43.8313	0.633059	1.57963	5.60345	FALSE	TRUE	3.22971e+09	8.42853e+08	2.96702e+08	5.67137	21.732	61.7349	0.463369	2.15811	10.8854	FALSE	FALSE	9.21746	8.68909	8.16629	11.1017	37.4769	124.899	0.799082	1.25144	11.2504	FALSE	FALSE
DW	M2-6:2 FTS	429.982	47.55	0.110586	1	4.70248e+07	4.25232e+08	1.98041	42.8612	47.2634	52.1297	0.993973	1.00606	1.21625	FALSE	FALSE	3.03653e+09	6.18509e+08	3.75483e+08	6.65884	32.6912	53.8502	0.687512	1.45452	8.08701	FALSE	FALSE	3.22243e+09	8.43368e+08	2.89207e+08	6.27471	23.9751	69.9146	0.504208	1.98331	11.1423	FALSE	FALSE	9.30063	8.78179	8.26536	10.1193	33.4185	109.754	0.702808	1.42286	10.846	FALSE	FALSE
DW	M2-6:2 FTS	429.982	47.55	0.110586	2	4.77536e+07	4.31823e+08	1.98041	43.6017	48.0754	53.0208	1.01105	1.01105	1.21603	FALSE	FALSE	3.03653e+09	6.18509e+08	3.75483e+08	6.76205	33.1979	54.6848	0.698168	1.43232	8.08701	FALSE	FALSE	3.22243e+09	8.43368e+08	2.89207e+08	6.37197	24.3467	70.9982	0.512023	1.95304	11.1423	FALSE	FALSE	9.30063	8.78179	8.26536	10.2762	33.9365	111.455	0.713701	1.40115	10.846	FALSE	FALSE
DW	M2-6:2 FTS	429.982	47.55	0.110586	3	4.81599e+07	4.35498e+08	1.98041	44.0321	48.5288	53.4977	1.02059	1.02059	1.21497	FALSE	FALSE	3.03653e+09	6.18509e+08	3.75483e+08	6.81959	33.4803	55.1501	0.704108	1.42024	8.08701	FALSE	FALSE	3.22243e+09	8.43368e+08	2.89207e+08	6.42618	24.5538	71.6023	0.516379	1.93656	11.1423	FALSE	FALSE	9.30063	8.78179	8.26536	10.3636	34.2252	112.403	0.719774	1.38933	10.846	FALSE	FALSE
DW	M2-8:2 FTS	529.976	48	0.0905702	1	5.45631e+07	6.0244e+08	1.78056	41.7461	48.1055	55.461	1.0022	1.0022	1.32853	FALSE	FALSE	4.01955e+09	4.51636e+08	3.69736e+08	7.19411	64.0275	78.2102	1.33391	1.33391	10.8714	FALSE	FALSE	3.22186e+09	8.43368e+08	2.89333e+08	8.97528	34.2877	99.944	0.714326	1.39992	11.1355	FALSE	FALSE	9.16345	8.63659	8.11282	19.8474	66.767	223.018	1.39098	1.39098	11.2366	FALSE	FALSE
DW	M2-8:2 FTS	529.976	48	0.0905702	2	5.53008e+07	6.10584e+08	1.78056	42.3741	48.8167	56.2674	1.01702	1.01702	1.32787	FALSE	FALSE	4.01955e+09	4.51636e+08	3.69736e+08	7.29137	64.8931	79.2676	1.35194	1.35194	10.8714	FALSE	FALSE	3.22186e+09	8.43368e+08	2.89333e+08	9.09662	34.7512	101.295	0.723984	1.38125	11.1355	FALSE	FALSE	9.16345	8.63659	8.11282	20.1157	67.6697	226.033	1.40979	1.40979	11.2366	FALSE	FALSE
DW	M2-8:2 FTS	529.976	48	0.0905702	3	5.45637e+07	6.02446e+08	1.78056	41.7466	48.1061	55.4616	1.00221	1.00221	1.32853	FALSE	FALSE	4.01955e+09	4.51636e+08	3.69736e+08	7.19418	64.0281	78.211	1.33392	1.33392	10.8714	FALSE	FALSE	3.22186e+09	8.43368e+08	2.89333e+08	8.97537	34.288	99.945	0.714334	1.39991	11.1355	FALSE	FALSE	9.16345	8.63659	8.11282	19.8476	66.7677	223.02	1.39099	1.39099	11.2366	FALSE	FALSE
DW	M2-4:2 FTS	329.988	93.8	0.284253	1	1.06154e+08	3.73451e+08	1.79624	81.1831	94.9202	111.17	1.01194	1.01194	1.36938	FALSE	FALSE	2.34165e+09	6.16928e+08	4.17894e+08	14.9594	56.7809	83.8243	0.60534	1.65196	5.60345	FALSE	TRUE	3.22971e+09	8.42853e+08	2.96702e+08	10.8461	41.5609	118.064	0.44308	2.25693	10.8854	FALSE	FALSE	9.21746	8.68909	8.16629	21.2311	71.6719	238.86	0.764093	1.30874	11.2504	FALSE	FALSE
DW	M2-4:2 FTS	329.988	93.8	0.284253	2	1.04798e+08	3.68679e+08	1.79624	79.9934	93.5273	109.534	0.997093	1.00292	1.36929	FALSE	FALSE	2.34165e+09	6.16928e+08	4.17894e+08	14.7682	56.0554	82.7532	0.597605	1.67335	5.60345	FALSE	TRUE	3.22971e+09	8.42853e+08	2.96702e+08	10.7075	41.0298	116.555	0.437418	2.28614	10.8854	FALSE	FALSE	9.21746	8.68909	8.16629	20.9598	70.7561	235.808	0.75433	1.32568	11.2504	FALSE	FALSE
DW	M2-4:2 FTS	329.988	93.8	0.284253	3	1.05857e+08	3.72404e+08	1.79624	80.9188	94.6141	110.815	1.00868	1.00868	1.36946	FALSE	FALSE	2.34165e+09	6.16928e+08	4.17894e+08	14.9174	56.6216	83.5892	0.603642	1.65661	5.60345	FALSE	TRUE	3.22971e+09	8.42853e+08	2.96702e+08	10.8157	41.4443	117.732	0.441837	2.26328	10.8854	FALSE	FALSE	9.21746	8.68909	8.16629	21.1716	71.4709	238.19	0.76195	1.31242	11.2504	FALSE	FALSE
DW	M2-6:2 FTS	429.982	95.1	0.221172	1	9.30343e+07	4.20642e+08	1.98041	87.2016	96.2931	106.405	1.01255	1.01255	1.22022	FALSE	FALSE	3.03653e+09	6.18509e+08	3.75483e+08	13.1739	64.6766	106.538	0.68009	1.47039	8.08701	FALSE	FALSE	3.22243e+09	8.43368e+08	2.89207e+08	12.414	47.4325	138.32	0.498765	2.00495	11.1423	FALSE	FALSE	9.30063	8.78179	8.26536	20.0202	66.1156	217.138	0.695221	1.43839	10.846	FALSE	FALSE
DW	M2-6:2 FTS	429.982	95.1	0.221172	2	9.15742e+07	4.14041e+08	1.98041	85.6282	94.5621	104.498	0.994344	1.00569	1.22037	FALSE	FALSE	3.03653e+09	6.18509e+08	3.75483e+08	12.9672	63.6616	104.866	0.669417	1.49384	8.08701	FALSE	FALSE	3.22243e+09	8.43368e+08	2.89207e+08	12.2191	46.6881	136.149	0.490937	2.03692	11.1423	FALSE	FALSE	9.30063	8.78179	8.26536	19.706	65.0779	213.73	0.684311	1.46132	10.846	FALSE	FALSE
DW	M2-6:2 FTS	429.982	95.1	0.221172	3	9.33141e+07	4.21907e+08	1.98041	87.5136	96.6255	106.759	1.01604	1.01604	1.21991	FALSE	FALSE	3.03653e+09	6.18509e+08	3.75483e+08	13.2135	64.8711	106.858	0.682135	1.46598	8.08701	FALSE	FALSE	3.22243e+09	8.43368e+08	2.89207e+08	12.4513	47.5752	138.736	0.500265	1.99894	11.1423	FALSE	FALSE	9.30063	8.78179	8.26536	20.0804	66.3144	217.791	0.697312	1.43408	10.846	FALSE	FALSE
DW	M2-8:2 FTS	529.976	96	0.18114	1	1.06631e+08	5.88667e+08	1.78056	82.8609	95.672	110.62	0.996584	1.00343	1.33501	FALSE	FALSE	4.01955e+09	4.51636e+08	3.69736e+08	14.0593	125.127	152.845	1.30341	1.30341	10.8714	FALSE	FALSE	3.22186e+09	8.43368e+08	2.89333e+08	17.5402	67.0076	195.318	0.697996	1.43267	11.1355	FALSE	FALSE	9.16345	8.63659	8.11282	38.7873	130.481	435.838	1.35918	1.35918	11.2366	FALSE	FALSE
DW	M2-8:2 FTS	529.976	96	0.18114	2	1.08404e+08	5.98452e+08	1.78056	84.4259	97.4734	112.699	1.01535	1.01535	1.33488	FALSE	FALSE	4.01955e+09	4.51636e+08	3.69736e+08	14.293	127.207	155.385	1.32508	1.32508	10.8714	FALSE	FALSE	3.22186e+09	8.43368e+08	2.89333e+08	17.8317	68.1214	198.565	0.709598	1.40925	11.1355	FALSE	FALSE	9.16345	8.63659	8.11282	39.432	132.65	443.083	1.38177	1.38177	11.2366	FALSE	FALSE
DW	M2-8:2 FTS	529.976	96	0.18114	3	1.11854e+08	6.17496e+08	1.78056	87.6642	100.997	116.524	1.05205	1.05205	1.32921	FALSE	FALSE	4.01955e+09	4.51636e+08	3.69736e+08	14.7478	131.255	160.33	1.36724	1.36724	10.8714	FALSE	FALSE	3.22186e+09	8.43368e+08	2.89333e+08	18.3992	70.2892	204.884	0.732179	1.36579	11.1355	FALSE	FALSE	9.16345	8.63659	8.11282	40.6869	136.871	457.183	1.42574	1.42574	11.2366	FALSE	FALSE
DW	M2-4:2 FTS	329.988	234.5	0.710631	1	2.14771e+08	3.02225e+08	1.79624	170.119	190.98	214.74	0.814416	1.22787	1.26229	FALSE	TRUE	2.34165e+09	6.16928e+08	4.17894e+08	30.2657	114.879	169.593	0.489888	2.04128	5.60345	FALSE	TRUE	3.22971e+09	8.42853e+08	2.96702e+08	21.9437	84.0856	238.865	0.358574	2.78882	10.8854	FALSE	FALSE	9.21746	8.68909	8.16629	42.9546	145.006	483.259	0.618363	1.61717	11.2504	FALSE	FALSE
DW	M2-4:2 FTS	329.988	234.5	0.710631	2	2.75552e+08	3.87756e+08	1.79624	224.299	261.826	306.609	1.11653	1.11653	1.36697	FALSE	FALSE	2.34165e+09	6.16928e+08	4.17894e+08	38.8311	147.39	217.588	0.628528	1.59102	5.60345	FALSE	TRUE	3.22971e+09	8.42853e+08	2.96702e+08	28.1539	107.882	306.465	0.460052	2.17367	10.8854	FALSE	FALSE	9.21746	8.68909	8.16629	55.111	186.043	620.023	0.793362	1.26046	11.2504	FALSE	FALSE
DW	M2-4:2 FTS	329.988	234.5	0.710631	3	2.71449e+08	3.81984e+08	1.79624	219.273	256.809	301.767	1.09513	1.09513	1.37621	FALSE	FALSE	2.34165e+09	6.16928e+08	4.17894e+08	38.253	145.196	214.349	0.619171	1.61506	5.60345	FALSE	TRUE	3.22971e+09	8.42853e+08	2.96702e+08	27.7348	106.276	301.903	0.453203	2.20652	10.8854	FALSE	FALSE	9.21746	8.68909	8.16629	54.2905	183.274	610.793	0.781551	1.27951	11.2504	FALSE	FALSE
DW	M2-6:2 FTS	429.982	237.75	0.55293	1	1.96844e+08	3.56002e+08	1.98041	192.212	204.409	217.479	0.859765	1.16311	1.13145	FALSE	TRUE	3.03653e+09	6.18509e+08	3.75483e+08	27.8737	136.844	225.415	0.575581	1.73737	8.08701	FALSE	TRUE	3.22243e+09	8.43368e+08	2.89207e+08	26.2658	100.359	292.66	0.42212	2.369	11.1423	FALSE	FALSE	9.30063	8.78179	8.26536	42.3592	139.889	459.427	0.588387	1.69956	10.846	FALSE	FALSE
DW	M2-6:2 FTS	429.982	237.75	0.55293	2	2.36296e+08	4.27352e+08	1.98041	234.04	257.549	283.759	1.08328	1.08328	1.21244	FALSE	FALSE	3.03653e+09	6.18509e+08	3.75483e+08	33.4602	164.271	270.593	0.690938	1.44731	8.08701	FALSE	FALSE	3.22243e+09	8.43368e+08	2.89207e+08	31.5299	120.473	351.315	0.506721	1.97347	11.1423	FALSE	FALSE	9.30063	8.78179	8.26536	50.8488	167.925	551.504	0.706311	1.41581	10.846	FALSE	FALSE
DW	M2-6:2 FTS	429.982	237.75	0.55293	3	2.34085e+08	4.23354e+08	1.98041	230.634	254.462	281.106	1.07029	1.07029	1.21884	FALSE	FALSE	3.03653e+09	6.18509e+08	3.75483e+08	33.1471	162.734	268.061	0.684474	1.46098	8.08701	FALSE	FALSE	3.22243e+09	8.43368e+08	2.89207e+08	31.2349	119.346	348.028	0.50198	1.99211	11.1423	FALSE	FALSE	9.30063	8.78179	8.26536	50.373	166.354	546.345	0.699703	1.42918	10.846	FALSE	FALSE
DW	M2-8:2 FTS	529.976	240	0.452851	1	2.2062e+08	4.87179e+08	1.78056	177.181	194.875	214.565	0.811981	1.23156	1.21099	FALSE	TRUE	4.01955e+09	4.51636e+08	3.69736e+08	29.0885	258.888	316.234	1.0787	1.0787	10.8714	FALSE	FALSE	3.22186e+09	8.43368e+08	2.89333e+08	36.2905	138.638	404.112	0.577659	1.73112	11.1355	FALSE	FALSE	9.16345	8.63659	8.11282	80.2506	269.965	901.746	1.12485	1.12485	11.2366	FALSE	FALSE
DW	M2-8:2 FTS	529.976	240	0.452851	2	2.89986e+08	6.40356e+08	1.78056	239.516	274.085	314.408	1.14202	1.14202	1.31268	FALSE	FALSE	4.01955e+09	4.51636e+08	3.69736e+08	38.2345	340.286	415.663	1.41786	1.41786	10.8714	FALSE	FALSE	3.22186e+09	8.43368e+08	2.89333e+08	47.7008	182.228	531.171	0.759285	1.31703	11.1355	FALSE	FALSE	9.16345	8.63659	8.11282	105.483	354.846	1185.27	1.47853	1.47853	11.2366	FALSE	FALSE
DW	M2-8:2 FTS	529.976	240	0.452851	3	2.79376e+08	6.16928e+08	1.78056	226.127	261.404	303.024	1.08918	1.08918	1.34006	FALSE	FALSE	4.01955e+09	4.51636e+08	3.69736e+08	36.8356	327.836	400.455	1.36598	1.36598	10.8714	FALSE	FALSE	3.22186e+09	8.43368e+08	2.89333e+08	45.9556	175.561	511.738	0.731505	1.36704	11.1355	FALSE	FALSE	9.16345	8.63659	8.11282	101.623	341.863	1141.9	1.42443	1.42443	11.2366	FALSE	FALSE
Sludge	MPFBA	218	5	0.0229358	1	1.24936e+07	5.44719e+08		4.30591	4.70565	5.13754	0.941131	1.06255	1.19314	FALSE	FALSE	6.25449e+09	3.95529e+09	1.8434e+09	0.435462	0.688596	1.47748	0.137719	7.26115	3.39291	FALSE	TRUE	9.62123e+09	5.36682e+09	1.90187e+09	0.283082	0.507487	1.43206	0.101497	9.85247	5.05884	FALSE	TRUE
Sludge	MPFBA	218	5	0.0229358	2	1.31265e+07	5.72317e+08		4.52677	4.97441	5.46048	0.994881	1.00515	1.20626	FALSE	FALSE	6.25449e+09	3.95529e+09	1.8434e+09	0.457525	0.723483	1.55234	0.144697	6.91101	3.39291	FALSE	TRUE	9.62123e+09	5.36682e+09	1.90187e+09	0.297424	0.533199	1.50462	0.10664	9.37737	5.05884	FALSE	TRUE
Sludge	MPFBA	218	5	0.0229358	3	1.29182e+07	5.63233e+08		4.44905	4.88597	5.36011	0.977194	1.02334	1.20478	FALSE	FALSE	6.25449e+09	3.95529e+09	1.8434e+09	0.450263	0.712001	1.5277	0.1424	7.02247	3.39291	FALSE	TRUE	9.62123e+09	5.36682e+09	1.90187e+09	0.292703	0.524736	1.48074	0.104947	9.5286	5.05884	FALSE	TRUE
Sludge	MPFBA	218	10	0.0458716	1	2.96662e+07	6.46723e+08		9.82748	10.6722	11.5836	1.06722	1.06722	1.1787	FALSE	FALSE	6.25449e+09	3.95529e+09	1.8434e+09	1.03401	1.63508	3.50831	0.163508	6.11589	3.39291	FALSE	TRUE	9.62123e+09	5.36682e+09	1.90187e+09	0.672183	1.20504	3.40046	0.120504	8.29849	5.05884	FALSE	TRUE
Sludge	MPFBA	218	10	0.0458716	2	2.82869e+07	6.16653e+08		9.2882	10.1613	11.1097	1.01613	1.01613	1.19611	FALSE	FALSE	6.25449e+09	3.95529e+09	1.8434e+09	0.985937	1.55906	3.34519	0.155906	6.41412	3.39291	FALSE	TRUE	9.62123e+09	5.36682e+09	1.90187e+09	0.64093	1.14901	3.24236	0.114901	8.70314	5.05884	FALSE	TRUE
Sludge	MPFBA	218	10	0.0458716	3	2.97975e+07	6.49584e+08		9.88372	10.7207	11.6229	1.07207	1.07207	1.17597	FALSE	FALSE	6.25449e+09	3.95529e+09	1.8434e+09	1.03859	1.64232	3.52384	0.164232	6.08895	3.39291	FALSE	TRUE	9.62123e+09	5.36682e+09	1.90187e+09	0.675157	1.21037	3.41551	0.121037	8.26194	5.05884	FALSE	TRUE
Sludge	MPFBA	218	25	0.114679	1	7.71243e+07	6.72524e+08		23.6206	25.7526	28.0733	1.0301	1.0301	1.18851	FALSE	FALSE	6.25449e+09	3.95529e+09	1.8434e+09	2.68816	4.25079	9.12069	0.170032	5.88126	3.39291	FALSE	TRUE	9.62123e+09	5.36682e+09	1.90187e+09	1.7475	3.13278	8.84032	0.125311	7.98013	5.05884	FALSE	TRUE
Sludge	MPFBA	218	25	0.114679	2	7.53105e+07	6.56708e+08		23.0389	25.1563	27.4643	1.00625	1.00625	1.19208	FALSE	FALSE	6.25449e+09	3.95529e+09	1.8434e+09	2.62494	4.15082	8.9062	0.166033	6.02291	3.39291	FALSE	TRUE	9.62123e+09	5.36682e+09	1.90187e+09	1.7064	3.05911	8.63241	0.122364	8.17232	5.05884	FALSE	TRUE
Sludge	MPFBA	218	25	0.114679	3	7.50058e+07	6.5405e+08		22.9456	25.0561	27.3566	1.00224	1.00224	1.19224	FALSE	FALSE	6.25449e+09	3.95529e+09	1.8434e+09	2.61432	4.13402	8.87016	0.165361	6.04738	3.39291	FALSE	TRUE	9.62123e+09	5.36682e+09	1.90187e+09	1.6995	3.04673	8.59748	0.121869	8.20552	5.05884	FALSE	TRUE
Sludge	MPFBA	218	50	0.229358	1	1.50311e+08	6.55354e+08		43.771	47.5825	51.7335	0.951649	1.05081	1.18191	FALSE	FALSE	6.25449e+09	3.95529e+09	1.8434e+09	5.23907	8.28453	17.7757	0.165691	6.03534	3.39291	FALSE	TRUE	9.62123e+09	5.36682e+09	1.90187e+09	3.40577	6.10561	17.2292	0.122112	8.1892	5.05884	FALSE	TRUE
Sludge	MPFBA	218	50	0.229358	2	1.53945e+08	6.712e+08		44.6708	48.7162	53.137	0.974323	1.02635	1.18953	FALSE	FALSE	6.25449e+09	3.95529e+09	1.8434e+09	5.36575	8.48485	18.2055	0.169697	5.89286	3.39291	FALSE	TRUE	9.62123e+09	5.36682e+09	1.90187e+09	3.48812	6.25324	17.6458	0.125065	7.99586	5.05884	FALSE	TRUE
Sludge	MPFBA	218	50	0.229358	3	1.57232e+08	6.85533e+08		45.5582	49.7418	54.3196	0.994836	1.00519	1.19231	FALSE	FALSE	6.25449e+09	3.95529e+09	1.8434e+09	5.48033	8.66604	18.5943	0.173321	5.76965	3.39291	FALSE	TRUE	9.62123e+09	5.36682e+09	1.90187e+09	3.56261	6.38677	18.0227	0.127735	7.82868	5.05884	FALSE	TRUE
Sludge	MPFBA	218	100	0.458716	1	3.21989e+08	7.01936e+08		88.3734	96.3812	105.167	0.963812	1.03755	1.19003	FALSE	FALSE	6.25449e+09	3.95529e+09	1.8434e+09	11.2229	17.7468	38.0783	0.177468	5.63482	3.39291	FALSE	TRUE	9.62123e+09	5.36682e+09	1.90187e+09	7.2957	13.0792	36.9078	0.130792	7.64574	5.05884	FALSE	TRUE
Sludge	MPFBA	218	100	0.458716	2	3.16565e+08	6.90112e+08		87.1071	94.7285	103.064	0.947285	1.05565	1.18319	FALSE	FALSE	6.25449e+09	3.95529e+09	1.8434e+09	11.0339	17.4478	37.4369	0.174478	5.73137	3.39291	FALSE	TRUE	9.62123e+09	5.36682e+09	1.90187e+09	7.1728	12.8588	36.286	0.128588	7.77675	5.05884	FALSE	TRUE
Sludge	MPFBA	218	100	0.458716	3	3.20909e+08	6.99582e+08		88.1135	96.0519	104.757	0.960519	1.0411	1.18889	FALSE	FALSE	6.25449e+09	3.95529e+09	1.8434e+09	11.1853	17.6873	37.9506	0.176873	5.65379	3.39291	FALSE	TRUE	9.62123e+09	5.36682e+09	1.90187e+09	7.27123	13.0353	36.784	0.130353	7.67147	5.05884	FALSE	TRUE
Sludge	MPFBA	218	250	1.14679	1	9.44178e+08	8.23323e+08		242.468	264.994	289.909	1.05998	1.05998	1.19566	FALSE	FALSE	6.25449e+09	3.95529e+09	1.8434e+09	32.9093	52.0394	111.658	0.208158	4.80405	3.39291	FALSE	TRUE	9.62123e+09	5.36682e+09	1.90187e+09	21.3934	38.3524	108.226	0.15341	6.51849	5.05884	FALSE	TRUE
Sludge	MPFBA	218	250	1.14679	2	8.93811e+08	7.79403e+08		226.74	248.998	273.746	0.995991	1.00402	1.20731	FALSE	FALSE	6.25449e+09	3.95529e+09	1.8434e+09	31.1537	49.2634	105.702	0.197053	5.07477	3.39291	FALSE	TRUE	9.62123e+09	5.36682e+09	1.90187e+09	20.2522	36.3065	102.452	0.145226	6.88581	5.05884	FALSE	TRUE
Sludge	MPFBA	218	250	1.14679	3	9.49856e+08	8.28274e+08		244.463	266.812	291.495	1.06725	1.06725	1.19239	FALSE	FALSE	6.25449e+09	3.95529e+09	1.8434e+09	33.1072	52.3523	112.33	0.209409	4.77534	3.39291	FALSE	TRUE	9.62123e+09	5.36682e+09	1.90187e+09	21.522	38.5831	108.877	0.154332	6.47953	5.05884	FALSE	TRUE
Sludge	M5PFPeA	269	0.5	0.00185874	1	3.18999e+06	1.71621e+09	1.22644	0.415871	0.466208	0.522189	0.932415	1.07248	1.25565	FALSE	FALSE	6.29888e+09	4.06151e+09	6.07087e+08	0.136232	0.211278	1.41348	0.422556	2.36655	10.3756	FALSE	FALSE	9.66543e+09	5.39728e+09	1.42448e+09	0.0887811	0.158989	0.602401	0.317978	3.14487	6.78524	FALSE	FALSE	9.5041	9.12606	8.73723	0.268809	0.641921	1.57149	1.28384	1.28384	5.84613	FALSE	FALSE
Sludge	M5PFPeA	269	0.5	0.00185874	2	3.41878e+06	1.8393e+09	1.22644	0.448995	0.505194	0.567918	1.01039	1.01039	1.26487	FALSE	FALSE	6.29888e+09	4.06151e+09	6.07087e+08	0.146002	0.226431	1.51486	0.452862	2.20818	10.3756	FALSE	FALSE	9.66543e+09	5.39728e+09	1.42448e+09	0.0951485	0.170392	0.645605	0.340783	2.93442	6.78524	FALSE	FALSE	9.5041	9.12606	8.73723	0.288088	0.687961	1.6842	1.37592	1.37592	5.84613	FALSE	FALSE
Sludge	M5PFPeA	269	0.5	0.00185874	3	2.87569e+06	1.54712e+09	1.22644	0.380782	0.413053	0.447859	0.826106	1.2105	1.17616	FALSE	TRUE	6.29888e+09	4.06151e+09	6.07087e+08	0.122809	0.190461	1.27422	0.380922	2.62521	10.3756	FALSE	FALSE	9.66543e+09	5.39728e+09	1.42448e+09	0.0800336	0.143324	0.543047	0.286648	3.4886	6.78524	FALSE	FALSE	9.5041	9.12606	8.73723	0.242324	0.578674	1.41665	1.15735	1.15735	5.84613	FALSE	FALSE
Sludge	M5PFPeA	269	1	0.00371747	1	6.91288e+06	1.85957e+09	1.22644	0.901578	1.01158	1.13423	1.01158	1.01158	1.25805	FALSE	FALSE	6.29888e+09	4.06151e+09	6.07087e+08	0.295222	0.457851	3.0631	0.457851	2.18412	10.3756	FALSE	FALSE	9.66543e+09	5.39728e+09	1.42448e+09	0.192394	0.344538	1.30544	0.344538	2.90244	6.78524	FALSE	FALSE	9.5041	9.12606	8.73723	0.582524	1.39108	3.40551	1.39108	1.39108	5.84613	FALSE	FALSE
Sludge	M5PFPeA	269	1	0.00371747	2	7.22972e+06	1.9448e+09	1.22644	0.950649	1.06283	1.18751	1.06283	1.06283	1.24916	FALSE	FALSE	6.29888e+09	4.06151e+09	6.07087e+08	0.308752	0.478836	3.20349	0.478836	2.0884	10.3756	FALSE	FALSE	9.66543e+09	5.39728e+09	1.42448e+09	0.201211	0.360329	1.36527	0.360329	2.77524	6.78524	FALSE	FALSE	9.5041	9.12606	8.73723	0.609222	1.45484	3.56159	1.45484	1.45484	5.84613	FALSE	FALSE
Sludge	M5PFPeA	269	1	0.00371747	3	7.29506e+06	1.96237e+09	1.22644	0.961342	1.07341	1.19782	1.07341	1.07341	1.24599	FALSE	FALSE	6.29888e+09	4.06151e+09	6.07087e+08	0.311543	0.483163	3.23244	0.483163	2.06969	10.3756	FALSE	FALSE	9.66543e+09	5.39728e+09	1.42448e+09	0.20303	0.363585	1.37761	0.363585	2.75039	6.78524	FALSE	FALSE	9.5041	9.12606	8.73723	0.614728	1.46798	3.59378	1.46798	1.46798	5.84613	FALSE	FALSE
Sludge	M5PFPeA	269	5	0.0185874	1	3.4357e+07	1.84841e+09	1.22644	4.39213	4.90942	5.48633	0.981885	1.01845	1.24913	FALSE	FALSE	6.29888e+09	4.06151e+09	6.07087e+08	1.46725	2.27552	15.2236	0.455104	2.1973	10.3756	FALSE	FALSE	9.66543e+09	5.39728e+09	1.42448e+09	0.956196	1.71235	6.48801	0.342471	2.91996	6.78524	FALSE	FALSE	9.5041	9.12606	8.73723	2.89514	6.91366	16.9254	1.38273	1.38273	5.84613	FALSE	FALSE
Sludge	M5PFPeA	269	5	0.0185874	2	3.65002e+07	1.96371e+09	1.22644	4.68501	5.22798	5.83261	1.0456	1.0456	1.24495	FALSE	FALSE	6.29888e+09	4.06151e+09	6.07087e+08	1.55878	2.41747	16.1732	0.483494	2.06828	10.3756	FALSE	FALSE	9.66543e+09	5.39728e+09	1.42448e+09	1.01584	1.81917	6.89274	0.363834	2.74851	6.78524	FALSE	FALSE	9.5041	9.12606	8.73723	3.07574	7.34494	17.9812	1.46899	1.46899	5.84613	FALSE	FALSE
Sludge	M5PFPeA	269	5	0.0185874	3	3.82336e+07	2.05697e+09	1.22644	4.94826	5.48588	6.0808	1.09718	1.09718	1.22888	FALSE	FALSE	6.29888e+09	4.06151e+09	6.07087e+08	1.6328	2.53227	16.9413	0.506454	1.97451	10.3756	FALSE	FALSE	9.66543e+09	5.39728e+09	1.42448e+09	1.06409	1.90556	7.22007	0.381112	2.6239	6.78524	FALSE	FALSE	9.5041	9.12606	8.73723	3.22181	7.69375	18.8351	1.53875	1.53875	5.84613	FALSE	FALSE
Sludge	M5PFPeA	269	10	0.0371747	1	7.32835e+07	1.97133e+09	1.22644	9.31288	10.3919	11.5954	1.03919	1.03919	1.24509	FALSE	FALSE	6.29888e+09	4.06151e+09	6.07087e+08	3.12965	4.85368	32.4719	0.485368	2.06029	10.3756	FALSE	FALSE	9.66543e+09	5.39728e+09	1.42448e+09	2.03957	3.65245	13.8389	0.365245	2.73789	6.78524	FALSE	FALSE	9.5041	9.12606	8.73723	6.17534	14.7468	36.1018	1.47468	1.47468	5.84613	FALSE	FALSE
Sludge	M5PFPeA	269	10	0.0371747	2	7.28233e+07	1.95895e+09	1.22644	9.24865	10.3247	11.5253	1.03247	1.03247	1.24617	FALSE	FALSE	6.29888e+09	4.06151e+09	6.07087e+08	3.10999	4.8232	32.268	0.48232	2.07331	10.3756	FALSE	FALSE	9.66543e+09	5.39728e+09	1.42448e+09	2.02676	3.62951	13.752	0.362951	2.75519	6.78524	FALSE	FALSE	9.5041	9.12606	8.73723	6.13656	14.6542	35.8751	1.46542	1.46542	5.84613	FALSE	FALSE
Sludge	M5PFPeA	269	10	0.0371747	3	7.22535e+07	1.94362e+09	1.22644	9.17019	10.2415	11.4373	1.02415	1.02415	1.24723	FALSE	FALSE	6.29888e+09	4.06151e+09	6.07087e+08	3.08566	4.78546	32.0155	0.478546	2.08966	10.3756	FALSE	FALSE	9.66543e+09	5.39728e+09	1.42448e+09	2.0109	3.60111	13.6444	0.360111	2.77692	6.78524	FALSE	FALSE	9.5041	9.12606	8.73723	6.08854	14.5396	35.5944	1.45396	1.45396	5.84613	FALSE	FALSE
Sludge	M5PFPeA	269	25	0.0929368	1	1.83369e+08	1.97305e+09	1.22644	22.9867	25.6729	28.6778	1.02692	1.02692	1.24758	FALSE	FALSE	6.29888e+09	4.06151e+09	6.07087e+08	7.83097	12.1448	81.2509	0.485794	2.05849	10.3756	FALSE	FALSE	9.66543e+09	5.39728e+09	1.42448e+09	5.10338	9.13912	34.6276	0.365565	2.73549	6.78524	FALSE	FALSE	9.5041	9.12606	8.73723	15.4519	36.8994	90.3336	1.47598	1.47598	5.84613	FALSE	FALSE
Sludge	M5PFPeA	269	25	0.0929368	2	1.83255e+08	1.97183e+09	1.22644	22.9712	25.6564	28.6602	1.02625	1.02625	1.24766	FALSE	FALSE	6.29888e+09	4.06151e+09	6.07087e+08	7.82609	12.1373	81.2003	0.485491	2.05977	10.3756	FALSE	FALSE	9.66543e+09	5.39728e+09	1.42448e+09	5.1002	9.13343	34.6061	0.365337	2.7372	6.78524	FALSE	FALSE	9.5041	9.12606	8.73723	15.4422	36.8764	90.2773	1.47506	1.47506	5.84613	FALSE	FALSE
Sludge	M5PFPeA	269	25	0.0929368	3	1.77771e+08	1.91282e+09	1.22644	22.2483	24.8627	27.7888	0.994508	1.00552	1.24903	FALSE	FALSE	6.29888e+09	4.06151e+09	6.07087e+08	7.5919	11.7741	78.7704	0.470963	2.12331	10.3756	FALSE	FALSE	9.66543e+09	5.39728e+09	1.42448e+09	4.94758	8.86011	33.5705	0.354404	2.82164	6.78524	FALSE	FALSE	9.5041	9.12606	8.73723	14.9801	35.7729	87.5758	1.43092	1.43092	5.84613	FALSE	FALSE
Sludge	M5PFPeA	269	50	0.185874	1	3.41386e+08	1.83666e+09	1.22644	42.3233	47.1768	52.603	0.943535	1.05984	1.24289	FALSE	FALSE	6.29888e+09	4.06151e+09	6.07087e+08	14.5792	22.6105	151.268	0.452211	2.21136	10.3756	FALSE	FALSE	9.66543e+09	5.39728e+09	1.42448e+09	9.50117	17.0147	64.4677	0.340293	2.93864	6.78524	FALSE	FALSE	9.5041	9.12606	8.73723	28.7674	68.6971	168.178	1.37394	1.37394	5.84613	FALSE	FALSE
Sludge	M5PFPeA	269	50	0.185874	2	3.53163e+08	1.90002e+09	1.22644	43.7336	48.8843	54.6597	0.977686	1.02282	1.24983	FALSE	FALSE	6.29888e+09	4.06151e+09	6.07087e+08	15.0822	23.3906	156.487	0.467811	2.13761	10.3756	FALSE	FALSE	9.66543e+09	5.39728e+09	1.42448e+09	9.82894	17.6016	66.6917	0.352033	2.84064	6.78524	FALSE	FALSE	9.5041	9.12606	8.73723	29.7598	71.067	173.98	1.42134	1.42134	5.84613	FALSE	FALSE
Sludge	M5PFPeA	269	50	0.185874	3	3.56616e+08	1.91859e+09	1.22644	44.1664	49.3857	55.2403	0.987714	1.01244	1.25073	FALSE	FALSE	6.29888e+09	4.06151e+09	6.07087e+08	15.2296	23.6192	158.016	0.472384	2.11692	10.3756	FALSE	FALSE	9.66543e+09	5.39728e+09	1.42448e+09	9.92502	17.7737	67.3436	0.355474	2.81314	6.78524	FALSE	FALSE	9.5041	9.12606	8.73723	30.0507	71.7618	175.68	1.43524	1.43524	5.84613	FALSE	FALSE
Sludge	M5PFPeA	269	100	0.371747	1	7.07471e+08	1.9031e+09	1.22644	86.6106	96.8908	108.447	0.968908	1.03209	1.25212	FALSE	FALSE	6.29888e+09	4.06151e+09	6.07087e+08	30.2132	46.8569	313.48	0.468569	2.13416	10.3756	FALSE	FALSE	9.66543e+09	5.39728e+09	1.42448e+09	19.6897	35.2603	133.599	0.352603	2.83605	6.78524	FALSE	FALSE	9.5041	9.12606	8.73723	59.616	142.364	348.523	1.42364	1.42364	5.84613	FALSE	FALSE
Sludge	M5PFPeA	269	100	0.371747	2	7.05256e+08	1.89714e+09	1.22644	86.3381	96.5649	108.058	0.965649	1.03557	1.25156	FALSE	FALSE	6.29888e+09	4.06151e+09	6.07087e+08	30.1187	46.7102	312.499	0.467102	2.14086	10.3756	FALSE	FALSE	9.66543e+09	5.39728e+09	1.42448e+09	19.6281	35.1499	133.181	0.351499	2.84495	6.78524	FALSE	FALSE	9.5041	9.12606	8.73723	59.4294	141.919	347.432	1.41919	1.41919	5.84613	FALSE	FALSE
Sludge	M5PFPeA	269	100	0.371747	3	7.07902e+08	1.90426e+09	1.22644	86.6638	96.9543	108.522	0.969543	1.03141	1.25222	FALSE	FALSE	6.29888e+09	4.06151e+09	6.07087e+08	30.2317	46.8855	313.671	0.468855	2.13286	10.3756	FALSE	FALSE	9.66543e+09	5.39728e+09	1.42448e+09	19.7017	35.2818	133.681	0.352818	2.83432	6.78524	FALSE	FALSE	9.5041	9.12606	8.73723	59.6523	142.451	348.735	1.42451	1.42451	5.84613	FALSE	FALSE
Sludge	M5PFPeA	269	250	0.929368	1	1.86205e+09	2.00356e+09	1.22644	225.047	252.725	284.037	1.0109	1.0109	1.26212	FALSE	FALSE	6.29888e+09	4.06151e+09	6.07087e+08	79.5206	123.326	825.073	0.493305	2.02714	10.3756	FALSE	FALSE	9.66543e+09	5.39728e+09	1.42448e+09	51.8229	92.8044	351.631	0.371217	2.69384	6.78524	FALSE	FALSE	9.5041	9.12606	8.73723	156.908	374.7	917.304	1.4988	1.4988	5.84613	FALSE	FALSE
Sludge	M5PFPeA	269	250	0.929368	2	1.86061e+09	2.00202e+09	1.22644	224.848	252.504	283.791	1.01002	1.01002	1.26215	FALSE	FALSE	6.29888e+09	4.06151e+09	6.07087e+08	79.4593	123.231	824.437	0.492925	2.0287	10.3756	FALSE	FALSE	9.66543e+09	5.39728e+09	1.42448e+09	51.783	92.7329	351.36	0.370931	2.69592	6.78524	FALSE	FALSE	9.5041	9.12606	8.73723	156.787	374.411	916.598	1.49764	1.49764	5.84613	FALSE	FALSE
Sludge	M5PFPeA	269	250	0.929368	3	1.83507e+09	1.97453e+09	1.22644	221.362	248.579	279.365	0.994315	1.00572	1.26203	FALSE	FALSE	6.29888e+09	4.06151e+09	6.07087e+08	78.3683	121.539	813.117	0.486157	2.05695	10.3756	FALSE	FALSE	9.66543e+09	5.39728e+09	1.42448e+09	51.072	91.4596	346.536	0.365838	2.73345	6.78524	FALSE	FALSE	9.5041	9.12606	8.73723	154.634	369.27	904.012	1.47708	1.47708	5.84613	FALSE	FALSE
Sludge	M5PFHxA	318.997	0.5	0.00156741	1	7.14477e+06	4.55832e+09	1.59329	0.48419	0.510717	0.538598	1.02143	1.02143	1.11237	FALSE	FALSE	6.41811e+09	4.87533e+09	1.8434e+09	0.355114	0.467488	1.23639	0.934977	1.06955	3.48167	FALSE	FALSE	9.72519e+09	5.42004e+09	1.28191e+09	0.234356	0.420506	1.77794	0.841011	1.18904	7.58647	FALSE	FALSE	9.5408	9.17101	8.79461	0.656114	1.53731	3.65736	3.07463	3.07463	5.57427	TRUE	FALSE
Sludge	M5PFHxA	318.997	0.5	0.00156741	2	7.20047e+06	4.59385e+09	1.59329	0.489274	0.515568	0.543179	1.03114	1.03114	1.11017	FALSE	FALSE	6.41811e+09	4.87533e+09	1.8434e+09	0.357882	0.471133	1.24603	0.942266	1.06127	3.48167	FALSE	FALSE	9.72519e+09	5.42004e+09	1.28191e+09	0.236183	0.423784	1.7918	0.847568	1.17985	7.58647	FALSE	FALSE	9.5408	9.17101	8.79461	0.661229	1.5493	3.68587	3.0986	3.0986	5.57427	TRUE	FALSE
Sludge	M5PFHxA	318.997	0.5	0.00156741	3	6.99115e+06	4.46031e+09	1.59329	0.471106	0.497366	0.52499	0.994732	1.0053	1.11438	FALSE	FALSE	6.41811e+09	4.87533e+09	1.8434e+09	0.347479	0.457437	1.20981	0.914874	1.09305	3.48167	FALSE	FALSE	9.72519e+09	5.42004e+09	1.28191e+09	0.229317	0.411465	1.73971	0.822929	1.21517	7.58647	FALSE	FALSE	9.5408	9.17101	8.79461	0.642007	1.50426	3.57872	3.00852	3.00852	5.57427	TRUE	FALSE
Sludge	M5PFHxA	318.997	1	0.00313483	1	1.38834e+07	4.42875e+09	1.59329	0.965583	1.01751	1.07207	1.01751	1.01751	1.11029	FALSE	FALSE	6.41811e+09	4.87533e+09	1.8434e+09	0.690039	0.9084	2.40249	0.9084	1.10084	3.48167	FALSE	FALSE	9.72519e+09	5.42004e+09	1.28191e+09	0.455389	0.817106	3.4548	0.817106	1.22383	7.58647	FALSE	FALSE	9.5408	9.17101	8.79461	1.27493	2.98723	7.10679	2.98723	2.98723	5.57427	TRUE	FALSE
Sludge	M5PFHxA	318.997	1	0.00313483	2	1.34929e+07	4.3042e+09	1.59329	0.933864	0.984269	1.03725	0.984269	1.01598	1.1107	FALSE	FALSE	6.41811e+09	4.87533e+09	1.8434e+09	0.670634	0.882854	2.33493	0.882854	1.13269	3.48167	FALSE	FALSE	9.72519e+09	5.42004e+09	1.28191e+09	0.442583	0.794127	3.35764	0.794127	1.25924	7.58647	FALSE	FALSE	9.5408	9.17101	8.79461	1.23907	2.90323	6.90694	2.90323	2.90323	5.57427	TRUE	FALSE
Sludge	M5PFHxA	318.997	1	0.00313483	3	1.31158e+07	4.18389e+09	1.59329	0.907393	0.952258	0.99922	0.952258	1.05014	1.1012	FALSE	TRUE	6.41811e+09	4.87533e+09	1.8434e+09	0.651888	0.858176	2.26966	0.858176	1.16526	3.48167	FALSE	FALSE	9.72519e+09	5.42004e+09	1.28191e+09	0.430212	0.77193	3.26379	0.77193	1.29545	7.58647	FALSE	FALSE	9.5408	9.17101	8.79461	1.20444	2.82208	6.71387	2.82208	2.82208	5.57427	TRUE	FALSE
Sludge	M5PFHxA	318.997	5	0.0156741	1	6.00786e+07	3.83298e+09	1.59329	4.46351	4.63898	4.8212	0.927797	1.07782	1.08014	FALSE	TRUE	6.41811e+09	4.87533e+09	1.8434e+09	2.98606	3.931	10.3965	0.786199	1.27194	3.48167	FALSE	FALSE	9.72519e+09	5.42004e+09	1.28191e+09	1.97064	3.53593	14.9502	0.707186	1.41406	7.58647	FALSE	FALSE	9.5408	9.17101	8.79461	5.5171	12.9269	30.7538	2.58538	2.58538	5.57427	TRUE	FALSE
Sludge	M5PFHxA	318.997	5	0.0156741	2	6.53005e+07	4.16613e+09	1.59329	4.83074	5.08254	5.34722	1.01651	1.01651	1.10692	FALSE	FALSE	6.41811e+09	4.87533e+09	1.8434e+09	3.24561	4.27267	11.3001	0.854534	1.17023	3.48167	FALSE	FALSE	9.72519e+09	5.42004e+09	1.28191e+09	2.14193	3.84327	16.2497	0.768653	1.30098	7.58647	FALSE	FALSE	9.5408	9.17101	8.79461	5.99664	14.0505	33.4269	2.8101	2.8101	5.57427	TRUE	FALSE
Sludge	M5PFHxA	318.997	5	0.0156741	3	6.51844e+07	4.15872e+09	1.59329	4.82074	5.07265	5.33747	1.01453	1.01453	1.10719	FALSE	FALSE	6.41811e+09	4.87533e+09	1.8434e+09	3.23983	4.26507	11.28	0.853014	1.17231	3.48167	FALSE	FALSE	9.72519e+09	5.42004e+09	1.28191e+09	2.13812	3.83643	16.2208	0.767286	1.30329	7.58647	FALSE	FALSE	9.5408	9.17101	8.79461	5.98597	14.0255	33.3674	2.8051	2.8051	5.57427	TRUE	FALSE
Sludge	M5PFHxA	318.997	10	0.0313483	1	1.25146e+08	3.99212e+09	1.59329	9.48755	9.98519	10.5088	0.998519	1.00148	1.10764	FALSE	FALSE	6.41811e+09	4.87533e+09	1.8434e+09	6.22008	8.18841	21.6563	0.818841	1.22124	3.48167	FALSE	FALSE	9.72519e+09	5.42004e+09	1.28191e+09	4.10493	7.36548	31.1419	0.736548	1.35769	7.58647	FALSE	FALSE	9.5408	9.17101	8.79461	11.4923	26.9272	64.0614	2.69272	2.69272	5.57427	TRUE	FALSE
Sludge	M5PFHxA	318.997	10	0.0313483	2	1.2434e+08	3.9664e+09	1.59329	9.42254	9.9154	10.4339	0.99154	1.00853	1.10733	FALSE	FALSE	6.41811e+09	4.87533e+09	1.8434e+09	6.18002	8.13567	21.5168	0.813567	1.22916	3.48167	FALSE	FALSE	9.72519e+09	5.42004e+09	1.28191e+09	4.07849	7.31803	30.9413	0.731803	1.36649	7.58647	FALSE	FALSE	9.5408	9.17101	8.79461	11.4183	26.7538	63.6487	2.67538	2.67538	5.57427	TRUE	FALSE
Sludge	M5PFHxA	318.997	10	0.0313483	3	1.27321e+08	4.06151e+09	1.59329	9.67249	10.1737	10.7008	1.01737	1.01737	1.10631	FALSE	FALSE	6.41811e+09	4.87533e+09	1.8434e+09	6.3282	8.33074	22.0327	0.833074	1.20037	3.48167	FALSE	FALSE	9.72519e+09	5.42004e+09	1.28191e+09	4.17628	7.4935	31.6832	0.74935	1.33449	7.58647	FALSE	FALSE	9.5408	9.17101	8.79461	11.6921	27.3953	65.1749	2.73953	2.73953	5.57427	TRUE	FALSE
Sludge	M5PFHxA	318.997	25	0.0783707	1	3.12005e+08	3.98114e+09	1.59329	24.6166	25.8509	27.1479	1.03403	1.03403	1.10283	FALSE	FALSE	6.41811e+09	4.87533e+09	1.8434e+09	15.5075	20.4148	53.9918	0.81659	1.2246	3.48167	FALSE	FALSE	9.72519e+09	5.42004e+09	1.28191e+09	10.2341	18.3631	77.6407	0.734523	1.36143	7.58647	FALSE	FALSE	9.5408	9.17101	8.79461	28.6518	67.133	159.713	2.68532	2.68532	5.57427	TRUE	FALSE
Sludge	M5PFHxA	318.997	25	0.0783707	2	3.06446e+08	3.91021e+09	1.59329	24.0931	25.3493	26.6718	1.01397	1.01397	1.10703	FALSE	FALSE	6.41811e+09	4.87533e+09	1.8434e+09	15.2312	20.051	53.0299	0.802042	1.24682	3.48167	FALSE	FALSE	9.72519e+09	5.42004e+09	1.28191e+09	10.0518	18.0359	76.2574	0.721436	1.38612	7.58647	FALSE	FALSE	9.5408	9.17101	8.79461	28.1414	65.9369	156.868	2.63748	2.63748	5.57427	TRUE	FALSE
Sludge	M5PFHxA	318.997	25	0.0783707	3	3.09979e+08	3.95529e+09	1.59329	24.4209	25.6679	26.9795	1.02672	1.02672	1.10477	FALSE	FALSE	6.41811e+09	4.87533e+09	1.8434e+09	15.4067	20.2822	53.6412	0.811287	1.23261	3.48167	FALSE	FALSE	9.72519e+09	5.42004e+09	1.28191e+09	10.1676	18.2438	77.1364	0.729752	1.37033	7.58647	FALSE	FALSE	9.5408	9.17101	8.79461	28.4658	66.697	158.676	2.66788	2.66788	5.57427	TRUE	FALSE
Sludge	M5PFHxA	318.997	50	0.156741	1	5.77178e+08	3.68236e+09	1.59329	46.4511	48.8546	51.386	0.977093	1.02344	1.10624	FALSE	FALSE	6.41811e+09	4.87533e+09	1.8434e+09	28.6872	37.7652	99.8795	0.755305	1.32397	3.48167	FALSE	FALSE	9.72519e+09	5.42004e+09	1.28191e+09	18.9321	33.9698	143.627	0.679397	1.47189	7.58647	FALSE	FALSE	9.5408	9.17101	8.79461	53.003	124.189	295.453	2.48379	2.48379	5.57427	TRUE	FALSE
Sludge	M5PFHxA	318.997	50	0.156741	2	5.86671e+08	3.74292e+09	1.59329	47.2466	49.7436	52.3764	0.994873	1.00515	1.10858	FALSE	FALSE	6.41811e+09	4.87533e+09	1.8434e+09	29.1591	38.3864	101.522	0.767728	1.30255	3.48167	FALSE	FALSE	9.72519e+09	5.42004e+09	1.28191e+09	19.2434	34.5285	145.99	0.690571	1.44808	7.58647	FALSE	FALSE	9.5408	9.17101	8.79461	53.8748	126.232	300.313	2.52464	2.52464	5.57427	TRUE	FALSE
Sludge	M5PFHxA	318.997	50	0.156741	3	5.93637e+08	3.78737e+09	1.59329	47.87	50.3973	53.0618	1.00795	1.00795	1.10846	FALSE	FALSE	6.41811e+09	4.87533e+09	1.8434e+09	29.5053	38.8422	102.728	0.776844	1.28726	3.48167	FALSE	FALSE	9.72519e+09	5.42004e+09	1.28191e+09	19.472	34.9386	147.723	0.698771	1.43108	7.58647	FALSE	FALSE	9.5408	9.17101	8.79461	54.5146	127.731	303.879	2.55462	2.55462	5.57427	TRUE	FALSE
Sludge	M5PFHxA	318.997	100	0.313483	1	1.15814e+09	3.69443e+09	1.59329	95.8666	100.987	106.392	1.00987	1.00987	1.1098	FALSE	FALSE	6.41811e+09	4.87533e+09	1.8434e+09	57.5626	75.7781	200.414	0.757781	1.31964	3.48167	FALSE	FALSE	9.72519e+09	5.42004e+09	1.28191e+09	37.9883	68.1624	288.197	0.681624	1.46708	7.58647	FALSE	FALSE	9.5408	9.17101	8.79461	106.354	249.193	592.844	2.49193	2.49193	5.57427	TRUE	FALSE
Sludge	M5PFHxA	318.997	100	0.313483	2	1.15368e+09	3.68021e+09	1.59329	95.4364	100.546	105.941	1.00546	1.00546	1.11007	FALSE	FALSE	6.41811e+09	4.87533e+09	1.8434e+09	57.341	75.4864	199.642	0.754864	1.32474	3.48167	FALSE	FALSE	9.72519e+09	5.42004e+09	1.28191e+09	37.842	67.9	287.087	0.679	1.47275	7.58647	FALSE	FALSE	9.5408	9.17101	8.79461	105.944	248.234	590.562	2.48234	2.48234	5.57427	TRUE	FALSE
Sludge	M5PFHxA	318.997	100	0.313483	3	1.12891e+09	3.60119e+09	1.59329	93.1833	98.1014	103.29	0.981014	1.01935	1.10846	FALSE	FALSE	6.41811e+09	4.87533e+09	1.8434e+09	56.1098	73.8656	195.356	0.738656	1.35381	3.48167	FALSE	FALSE	9.72519e+09	5.42004e+09	1.28191e+09	37.0295	66.4421	280.923	0.664421	1.50507	7.58647	FALSE	FALSE	9.5408	9.17101	8.79461	103.669	242.904	577.881	2.42904	2.42904	5.57427	TRUE	FALSE
Sludge	M5PFHxA	318.997	250	0.783707	1	2.75917e+09	3.52067e+09	1.59329	235.663	248.603	262.298	0.994414	1.00562	1.11302	FALSE	FALSE	6.41811e+09	4.87533e+09	1.8434e+09	137.138	180.535	477.47	0.72214	1.38477	3.48167	FALSE	FALSE	9.72519e+09	5.42004e+09	1.28191e+09	90.5039	162.391	686.605	0.649565	1.53949	7.58647	FALSE	FALSE	9.5408	9.17101	8.79461	253.379	593.682	1412.4	2.37473	2.37473	5.57427	TRUE	FALSE
Sludge	M5PFHxA	318.997	250	0.783707	2	2.7446e+09	3.50208e+09	1.59329	234.233	247.037	260.585	0.988149	1.01199	1.1125	FALSE	FALSE	6.41811e+09	4.87533e+09	1.8434e+09	136.414	179.582	474.948	0.718327	1.39212	3.48167	FALSE	FALSE	9.72519e+09	5.42004e+09	1.28191e+09	90.0259	161.534	682.979	0.646135	1.54767	7.58647	FALSE	FALSE	9.5408	9.17101	8.79461	252.041	590.546	1404.94	2.36219	2.36219	5.57427	TRUE	FALSE
Sludge	M5PFHxA	318.997	250	0.783707	3	2.78594e+09	3.55482e+09	1.59329	238.388	251.485	265.347	1.00594	1.00594	1.11309	FALSE	FALSE	6.41811e+09	4.87533e+09	1.8434e+09	138.468	182.286	482.101	0.729145	1.37147	3.48167	FALSE	FALSE	9.72519e+09	5.42004e+09	1.28191e+09	91.3817	163.966	693.265	0.655866	1.5247	7.58647	FALSE	FALSE	9.5408	9.17101	8.79461	255.836	599.44	1426.1	2.39776	2.39776	5.57427	TRUE	FALSE
Sludge	M3PFBS	302.96	0.466	0.00153816	1	9.87551e+06	6.42036e+09	2.14144	0.44762	0.474814	0.503548	1.01891	1.01891	1.12495	FALSE	FALSE	1.13798e+10	7.78135e+09	2.2766e+09	0.262912	0.384495	1.31419	0.825097	1.21198	4.99861	FALSE	FALSE	9.71274e+09	5.19725e+09	1.28368e+09	0.308037	0.575668	2.33071	1.23534	1.23534	7.56633	FALSE	FALSE	9.88013	9.52891	9.17917	0.394292	0.885187	1.98051	1.89954	1.89954	5.02296	FALSE	FALSE
Sludge	M3PFBS	302.96	0.466	0.00153816	2	9.69316e+06	6.30181e+09	2.14144	0.437218	0.464093	0.492506	0.995908	1.00411	1.12645	FALSE	FALSE	1.13798e+10	7.78135e+09	2.2766e+09	0.258057	0.377395	1.28993	0.809861	1.23478	4.99861	FALSE	FALSE	9.71274e+09	5.19725e+09	1.28368e+09	0.302349	0.565038	2.28767	1.21253	1.21253	7.56633	FALSE	FALSE	9.88013	9.52891	9.17917	0.387011	0.868841	1.94394	1.86447	1.86447	5.02296	FALSE	FALSE
Sludge	M3PFBS	302.96	0.466	0.00153816	3	9.73332e+06	6.32792e+09	2.14144	0.439437	0.466452	0.495013	1.00097	1.00097	1.12647	FALSE	FALSE	1.13798e+10	7.78135e+09	2.2766e+09	0.259126	0.378959	1.29527	0.813216	1.22969	4.99861	FALSE	FALSE	9.71274e+09	5.19725e+09	1.28368e+09	0.303602	0.567379	2.29715	1.21755	1.21755	7.56633	FALSE	FALSE	9.88013	9.52891	9.17917	0.388615	0.872441	1.95199	1.87219	1.87219	5.02296	FALSE	FALSE
Sludge	M3PFBS	302.96	0.932	0.00307631	1	1.96525e+07	6.38834e+09	2.14144	0.925444	0.976862	1.03099	1.04814	1.04814	1.11404	FALSE	FALSE	1.13798e+10	7.78135e+09	2.2766e+09	0.523201	0.765155	2.61528	0.820982	1.21805	4.99861	FALSE	FALSE	9.71274e+09	5.19725e+09	1.28368e+09	0.613002	1.14559	4.63817	1.22918	1.22918	7.56633	FALSE	FALSE	9.88013	9.52891	9.17917	0.784651	1.76154	3.94127	1.89007	1.89007	5.02296	FALSE	FALSE
Sludge	M3PFBS	302.96	0.932	0.00307631	2	1.92567e+07	6.25967e+09	2.14144	0.900841	0.95391	1.00994	1.02351	1.02351	1.12111	FALSE	FALSE	1.13798e+10	7.78135e+09	2.2766e+09	0.512663	0.749743	2.5626	0.804445	1.24309	4.99861	FALSE	FALSE	9.71274e+09	5.19725e+09	1.28368e+09	0.600655	1.12252	4.54475	1.20442	1.20442	7.56633	FALSE	FALSE	9.88013	9.52891	9.17917	0.768847	1.72606	3.86188	1.852	1.852	5.02296	FALSE	FALSE
Sludge	M3PFBS	302.96	0.932	0.00307631	3	1.86567e+07	6.06464e+09	2.14144	0.867442	0.919222	0.973926	0.98629	1.0139	1.12276	FALSE	FALSE	1.13798e+10	7.78135e+09	2.2766e+09	0.496691	0.726384	2.48276	0.779382	1.28307	4.99861	FALSE	FALSE	9.71274e+09	5.19725e+09	1.28368e+09	0.581941	1.08755	4.40316	1.1669	1.1669	7.56633	FALSE	FALSE	9.88013	9.52891	9.17917	0.744893	1.67229	3.74156	1.7943	1.7943	5.02296	FALSE	FALSE
Sludge	M3PFBS	302.96	4.66	0.0153816	1	8.08163e+07	5.25411e+09	2.14144	4.08652	4.23965	4.39839	0.909796	1.09915	1.07632	FALSE	TRUE	1.13798e+10	7.78135e+09	2.2766e+09	2.15154	3.14652	10.7547	0.675218	1.481	4.99861	FALSE	FALSE	9.71274e+09	5.19725e+09	1.28368e+09	2.52083	4.71098	19.0734	1.01094	1.01094	7.56633	FALSE	FALSE	9.88013	9.52891	9.17917	3.22669	7.24393	16.2075	1.55449	1.55449	5.02296	FALSE	FALSE
Sludge	M3PFBS	302.96	4.66	0.0153816	2	8.64518e+07	5.62049e+09	2.14144	4.31908	4.56662	4.82805	0.97996	1.02045	1.11784	FALSE	FALSE	1.13798e+10	7.78135e+09	2.2766e+09	2.30157	3.36593	11.5047	0.722303	1.38446	4.99861	FALSE	FALSE	9.71274e+09	5.19725e+09	1.28368e+09	2.69661	5.03949	20.4034	1.08144	1.08144	7.56633	FALSE	FALSE	9.88013	9.52891	9.17917	3.45169	7.74906	17.3377	1.66289	1.66289	5.02296	FALSE	FALSE
Sludge	M3PFBS	302.96	4.66	0.0153816	3	8.94049e+07	5.81247e+09	2.14144	4.48089	4.73864	5.01094	1.01688	1.01688	1.11829	FALSE	FALSE	1.13798e+10	7.78135e+09	2.2766e+09	2.38019	3.48091	11.8976	0.746975	1.33873	4.99861	FALSE	FALSE	9.71274e+09	5.19725e+09	1.28368e+09	2.78872	5.21163	21.1004	1.11838	1.11838	7.56633	FALSE	FALSE	9.88013	9.52891	9.17917	3.5696	8.01376	17.9299	1.71969	1.71969	5.02296	FALSE	FALSE
Sludge	M3PFBS	302.96	9.32	0.0307631	1	1.70767e+08	5.55102e+09	2.14144	8.80204	9.3108	9.8488	0.999013	1.00099	1.11892	FALSE	FALSE	1.13798e+10	7.78135e+09	2.2766e+09	4.54625	6.64865	22.7249	0.713375	1.40179	4.99861	FALSE	FALSE	9.71274e+09	5.19725e+09	1.28368e+09	5.32656	9.9544	40.3025	1.06807	1.06807	7.56633	FALSE	FALSE	9.88013	9.52891	9.17917	6.81806	15.3066	34.2468	1.64234	1.64234	5.02296	FALSE	FALSE
Sludge	M3PFBS	302.96	9.32	0.0307631	2	1.70302e+08	5.53591e+09	2.14144	8.77612	9.28314	9.81929	0.996045	1.00397	1.11886	FALSE	FALSE	1.13798e+10	7.78135e+09	2.2766e+09	4.53387	6.63056	22.6631	0.711433	1.40561	4.99861	FALSE	FALSE	9.71274e+09	5.19725e+09	1.28368e+09	5.31206	9.9273	40.1928	1.06516	1.06516	7.56633	FALSE	FALSE	9.88013	9.52891	9.17917	6.7995	15.2649	34.1536	1.63787	1.63787	5.02296	FALSE	FALSE
Sludge	M3PFBS	302.96	9.32	0.0307631	3	1.65323e+08	5.37405e+09	2.14144	8.51719	8.98732	9.48324	0.964304	1.03702	1.11342	FALSE	FALSE	1.13798e+10	7.78135e+09	2.2766e+09	4.40131	6.4367	22.0005	0.690633	1.44795	4.99861	FALSE	FALSE	9.71274e+09	5.19725e+09	1.28368e+09	5.15675	9.63705	39.0176	1.03402	1.03402	7.56633	FALSE	FALSE	9.88013	9.52891	9.17917	6.6007	14.8186	33.1551	1.58998	1.58998	5.02296	FALSE	FALSE
Sludge	M3PFBS	302.96	23.3	0.0769078	1	4.18527e+08	5.44194e+09	2.14144	22.5006	23.7848	25.1434	1.02081	1.02081	1.11746	FALSE	FALSE	1.13798e+10	7.78135e+09	2.2766e+09	11.1423	16.295	55.6959	0.699357	1.42989	4.99861	FALSE	FALSE	9.71274e+09	5.19725e+09	1.28368e+09	13.0547	24.397	98.7762	1.04708	1.04708	7.56633	FALSE	FALSE	9.88013	9.52891	9.17917	16.7102	37.5145	83.9347	1.61006	1.61006	5.02296	FALSE	FALSE
Sludge	M3PFBS	302.96	23.3	0.0769078	2	4.16843e+08	5.42004e+09	2.14144	22.3947	23.68	25.04	1.01631	1.01631	1.11812	FALSE	FALSE	1.13798e+10	7.78135e+09	2.2766e+09	11.0974	16.2295	55.4718	0.696543	1.43566	4.99861	FALSE	FALSE	9.71274e+09	5.19725e+09	1.28368e+09	13.0022	24.2988	98.3788	1.04287	1.04287	7.56633	FALSE	FALSE	9.88013	9.52891	9.17917	16.643	37.3635	83.597	1.60359	1.60359	5.02296	FALSE	FALSE
Sludge	M3PFBS	302.96	23.3	0.0769078	3	4.15358e+08	5.40073e+09	2.14144	22.3028	23.5875	24.9473	1.01234	1.01234	1.11857	FALSE	FALSE	1.13798e+10	7.78135e+09	2.2766e+09	11.0579	16.1716	55.2742	0.694061	1.44079	4.99861	FALSE	FALSE	9.71274e+09	5.19725e+09	1.28368e+09	12.9559	24.2122	98.0283	1.03915	1.03915	7.56633	FALSE	FALSE	9.88013	9.52891	9.17917	16.5837	37.2304	83.2992	1.59787	1.59787	5.02296	FALSE	FALSE
Sludge	M3PFBS	302.96	46.6	0.153816	1	7.78083e+08	5.05855e+09	2.14144	42.9168	45.3561	47.938	0.973307	1.02743	1.117	FALSE	FALSE	1.13798e+10	7.78135e+09	2.2766e+09	20.7146	30.294	103.544	0.650086	1.53826	4.99861	FALSE	FALSE	9.71274e+09	5.19725e+09	1.28368e+09	24.27	45.3563	183.635	0.973312	1.02742	7.56633	FALSE	FALSE	9.88013	9.52891	9.17917	31.0659	69.7431	156.043	1.49663	1.49663	5.02296	FALSE	FALSE
Sludge	M3PFBS	302.96	46.6	0.153816	2	8.03021e+08	5.22068e+09	2.14144	44.3915	46.9747	49.7126	1.00804	1.00804	1.11987	FALSE	FALSE	1.13798e+10	7.78135e+09	2.2766e+09	21.3785	31.265	106.863	0.670922	1.49049	4.99861	FALSE	FALSE	9.71274e+09	5.19725e+09	1.28368e+09	25.0479	46.8101	189.52	1.00451	1.00451	7.56633	FALSE	FALSE	9.88013	9.52891	9.17917	32.0616	71.9784	161.044	1.5446	1.5446	5.02296	FALSE	FALSE
Sludge	M3PFBS	302.96	46.6	0.153816	3	8.12498e+08	5.28229e+09	2.14144	45.0049	47.5917	50.3316	1.02128	1.02128	1.11836	FALSE	FALSE	1.13798e+10	7.78135e+09	2.2766e+09	21.6308	31.6339	108.124	0.67884	1.4731	4.99861	FALSE	FALSE	9.71274e+09	5.19725e+09	1.28368e+09	25.3435	47.3625	191.757	1.01636	1.01636	7.56633	FALSE	FALSE	9.88013	9.52891	9.17917	32.44	72.8278	162.945	1.56283	1.56283	5.02296	FALSE	FALSE
Sludge	M3PFBS	302.96	93.2	0.307631	1	1.56564e+09	5.08933e+09	2.14144	89.2055	94.4456	100.007	1.01336	1.01336	1.12108	FALSE	FALSE	1.13798e+10	7.78135e+09	2.2766e+09	41.6813	60.9568	208.349	0.654043	1.52895	4.99861	FALSE	FALSE	9.71274e+09	5.19725e+09	1.28368e+09	48.8354	91.2648	369.505	0.979236	1.0212	7.56633	FALSE	FALSE	9.88013	9.52891	9.17917	62.51	140.335	313.985	1.50574	1.50574	5.02296	FALSE	FALSE
Sludge	M3PFBS	302.96	93.2	0.307631	2	1.54971e+09	5.03755e+09	2.14144	88.1458	93.3501	98.8752	1.00161	1.00161	1.12172	FALSE	FALSE	1.13798e+10	7.78135e+09	2.2766e+09	41.2572	60.3365	206.229	0.647388	1.54467	4.99861	FALSE	FALSE	9.71274e+09	5.19725e+09	1.28368e+09	48.3385	90.3361	365.745	0.969272	1.0317	7.56633	FALSE	FALSE	9.88013	9.52891	9.17917	61.8739	138.907	310.79	1.49042	1.49042	5.02296	FALSE	FALSE
Sludge	M3PFBS	302.96	93.2	0.307631	3	1.55803e+09	5.0646e+09	2.14144	88.6938	93.9223	99.4724	1.00775	1.00775	1.12153	FALSE	FALSE	1.13798e+10	7.78135e+09	2.2766e+09	41.4788	60.6606	207.336	0.650865	1.53642	4.99861	FALSE	FALSE	9.71274e+09	5.19725e+09	1.28368e+09	48.5981	90.8213	367.709	0.974478	1.02619	7.56633	FALSE	FALSE	9.88013	9.52891	9.17917	62.2062	139.653	312.459	1.49842	1.49842	5.02296	FALSE	FALSE
Sludge	M3PFBS	302.96	233	0.769078	1	3.6955e+09	4.8051e+09	2.14144	218.066	231.25	245.281	0.992488	1.00757	1.1248	FALSE	FALSE	1.13798e+10	7.78135e+09	2.2766e+09	98.3837	143.881	491.782	0.617516	1.61939	4.99861	FALSE	FALSE	9.71274e+09	5.19725e+09	1.28368e+09	115.27	215.42	872.171	0.924547	1.08161	7.56633	FALSE	FALSE	9.88013	9.52891	9.17917	147.547	331.244	741.124	1.42165	1.42165	5.02296	FALSE	FALSE
Sludge	M3PFBS	302.96	233	0.769078	2	3.74845e+09	4.87396e+09	2.14144	221.823	235.234	249.506	1.00959	1.00959	1.1248	FALSE	FALSE	1.13798e+10	7.78135e+09	2.2766e+09	99.7935	145.943	498.829	0.626364	1.59652	4.99861	FALSE	FALSE	9.71274e+09	5.19725e+09	1.28368e+09	116.922	218.506	884.668	0.937795	1.06633	7.56633	FALSE	FALSE	9.88013	9.52891	9.17917	149.661	335.99	751.743	1.44202	1.44202	5.02296	FALSE	FALSE
Sludge	M3PFBS	302.96	233	0.769078	3	3.71046e+09	4.82456e+09	2.14144	219.104	232.374	246.499	0.997314	1.00269	1.12503	FALSE	FALSE	1.13798e+10	7.78135e+09	2.2766e+09	98.7822	144.464	493.774	0.620017	1.61286	4.99861	FALSE	FALSE	9.71274e+09	5.19725e+09	1.28368e+09	115.737	216.292	875.704	0.928292	1.07725	7.56633	FALSE	FALSE	9.88013	9.52891	9.17917	148.145	332.586	744.125	1.42741	1.42741	5.02296	FALSE	FALSE
Sludge	M4PFHpA	367.99	0.5	0.00135873	1	9.00116e+06	6.62468e+09	1.79816	0.457889	0.496674	0.538512	0.993347	1.0067	1.17608	FALSE	FALSE	7.3902e+09	5.15387e+09	3.63675e+09	0.448207	0.64269	0.910797	1.28538	1.28538	2.03209	FALSE	FALSE	9.70836e+09	5.20189e+09	1.28963e+09	0.341184	0.636758	2.56844	1.27352	1.27352	7.528	FALSE	FALSE	9.75984	9.37246	8.98374	0.575825	1.40499	3.43868	2.80997	2.80997	5.97174	TRUE	FALSE
Sludge	M4PFHpA	367.99	0.5	0.00135873	2	8.94625e+06	6.58426e+09	1.79816	0.454472	0.492886	0.534318	0.985772	1.01443	1.17569	FALSE	FALSE	7.3902e+09	5.15387e+09	3.63675e+09	0.445473	0.638769	0.905241	1.27754	1.27754	2.03209	FALSE	FALSE	9.70836e+09	5.20189e+09	1.28963e+09	0.339103	0.632873	2.55277	1.26575	1.26575	7.528	FALSE	FALSE	9.75984	9.37246	8.98374	0.572311	1.39641	3.4177	2.79283	2.79283	5.97174	TRUE	FALSE
Sludge	M4PFHpA	367.99	0.5	0.00135873	3	8.72049e+06	6.41811e+09	1.79816	0.441191	0.477357	0.516279	0.954715	1.04743	1.17019	FALSE	FALSE	7.3902e+09	5.15387e+09	3.63675e+09	0.434231	0.62265	0.882397	1.2453	1.2453	2.03209	FALSE	FALSE	9.70836e+09	5.20189e+09	1.28963e+09	0.330546	0.616902	2.48835	1.2338	1.2338	7.528	FALSE	FALSE	9.75984	9.37246	8.98374	0.557869	1.36118	3.33145	2.72235	2.72235	5.97174	TRUE	FALSE
Sludge	M4PFHpA	367.99	1	0.00271746	1	1.77537e+07	6.53319e+09	1.79816	0.950958	1.02839	1.11178	1.02839	1.02839	1.16911	FALSE	FALSE	7.3902e+09	5.15387e+09	3.63675e+09	0.884035	1.26763	1.79644	1.26763	1.26763	2.03209	FALSE	FALSE	9.70836e+09	5.20189e+09	1.28963e+09	0.672945	1.25593	5.06593	1.25593	1.25593	7.528	FALSE	FALSE	9.75984	9.37246	8.98374	1.13574	2.77116	6.78237	2.77116	2.77116	5.97174	TRUE	FALSE
Sludge	M4PFHpA	367.99	1	0.00271746	2	1.72216e+07	6.3374e+09	1.79816	0.91606	0.991726	1.0733	0.991726	1.00834	1.17165	FALSE	FALSE	7.3902e+09	5.15387e+09	3.63675e+09	0.857541	1.22964	1.7426	1.22964	1.22964	2.03209	FALSE	FALSE	9.70836e+09	5.20189e+09	1.28963e+09	0.652777	1.21829	4.91411	1.21829	1.21829	7.528	FALSE	FALSE	9.75984	9.37246	8.98374	1.10171	2.68812	6.57911	2.68812	2.68812	5.97174	TRUE	FALSE
Sludge	M4PFHpA	367.99	1	0.00271746	3	1.6721e+07	6.15316e+09	1.79816	0.886339	0.957366	1.03377	0.957366	1.04453	1.16633	FALSE	FALSE	7.3902e+09	5.15387e+09	3.63675e+09	0.832611	1.19389	1.69194	1.19389	1.19389	2.03209	FALSE	FALSE	9.70836e+09	5.20189e+09	1.28963e+09	0.6338	1.18287	4.77125	1.18287	1.18287	7.528	FALSE	FALSE	9.75984	9.37246	8.98374	1.06968	2.60997	6.38785	2.60997	2.60997	5.97174	TRUE	FALSE
Sludge	M4PFHpA	367.99	5	0.0135873	1	7.45452e+07	5.48638e+09	1.79816	4.38751	4.71644	5.0695	0.943288	1.06012	1.15544	FALSE	FALSE	7.3902e+09	5.15387e+09	3.63675e+09	3.71193	5.32259	7.54298	1.06452	1.06452	2.03209	FALSE	FALSE	9.70836e+09	5.20189e+09	1.28963e+09	2.8256	5.27346	21.2711	1.05469	1.05469	7.528	FALSE	FALSE	9.75984	9.37246	8.98374	4.76883	11.6357	28.4782	2.32714	2.32714	5.97174	FALSE	FALSE
Sludge	M4PFHpA	367.99	5	0.0135873	2	7.92678e+07	5.83396e+09	1.79816	4.67995	5.0533	5.45583	1.01066	1.01066	1.16579	FALSE	FALSE	7.3902e+09	5.15387e+09	3.63675e+09	3.94709	5.65979	8.02085	1.13196	1.13196	2.03209	FALSE	FALSE	9.70836e+09	5.20189e+09	1.28963e+09	3.00461	5.60754	22.6187	1.12151	1.12151	7.528	FALSE	FALSE	9.75984	9.37246	8.98374	5.07094	12.3729	30.2824	2.47457	2.47457	5.97174	TRUE	FALSE
Sludge	M4PFHpA	367.99	5	0.0135873	3	7.96999e+07	5.86576e+09	1.79816	4.70968	5.08422	5.48794	1.01684	1.01684	1.16525	FALSE	FALSE	7.3902e+09	5.15387e+09	3.63675e+09	3.96861	5.69064	8.06456	1.13813	1.13813	2.03209	FALSE	FALSE	9.70836e+09	5.20189e+09	1.28963e+09	3.02098	5.63811	22.742	1.12762	1.12762	7.528	FALSE	FALSE	9.75984	9.37246	8.98374	5.09858	12.4403	30.4474	2.48806	2.48806	5.97174	TRUE	FALSE
Sludge	M4PFHpA	367.99	10	0.0271746	1	1.52408e+08	5.60848e+09	1.79816	9.39802	10.1428	10.9463	1.01428	1.01428	1.16475	FALSE	FALSE	7.3902e+09	5.15387e+09	3.63675e+09	7.58908	10.8821	15.4217	1.08821	1.08821	2.03209	FALSE	FALSE	9.70836e+09	5.20189e+09	1.28963e+09	5.77696	10.7816	43.4889	1.07816	1.07816	7.528	FALSE	FALSE	9.75984	9.37246	8.98374	9.7499	23.7893	58.2239	2.37893	2.37893	5.97174	FALSE	FALSE
Sludge	M4PFHpA	367.99	10	0.0271746	2	1.54959e+08	5.70235e+09	1.79816	9.58455	10.3319	11.1372	1.03319	1.03319	1.16199	FALSE	FALSE	7.3902e+09	5.15387e+09	3.63675e+09	7.7161	11.0642	15.6798	1.10642	1.10642	2.03209	FALSE	FALSE	9.70836e+09	5.20189e+09	1.28963e+09	5.87365	10.9621	44.2168	1.09621	1.09621	7.528	FALSE	FALSE	9.75984	9.37246	8.98374	9.91309	24.1875	59.1984	2.41875	2.41875	5.97174	FALSE	FALSE
Sludge	M4PFHpA	367.99	10	0.0271746	3	1.5005e+08	5.52171e+09	1.79816	9.23393	9.96836	10.7609	0.996836	1.00317	1.16536	FALSE	FALSE	7.3902e+09	5.15387e+09	3.63675e+09	7.47167	10.7137	15.1831	1.07137	1.07137	2.03209	FALSE	FALSE	9.70836e+09	5.20189e+09	1.28963e+09	5.68758	10.6148	42.8162	1.06148	1.06148	7.528	FALSE	FALSE	9.75984	9.37246	8.98374	9.59906	23.4213	57.3232	2.34213	2.34213	5.97174	FALSE	FALSE
Sludge	M4PFHpA	367.99	25	0.0679366	1	3.7581e+08	5.53177e+09	1.79816	24.7658	26.5978	28.5673	1.06391	1.06391	1.1535	FALSE	FALSE	7.3902e+09	5.15387e+09	3.63675e+09	18.7132	26.8331	38.0269	1.07332	1.07332	2.03209	FALSE	FALSE	9.70836e+09	5.20189e+09	1.28963e+09	14.2449	26.5854	107.235	1.06342	1.06342	7.528	FALSE	FALSE	9.75984	9.37246	8.98374	24.0414	58.6599	143.569	2.3464	2.3464	5.97174	FALSE	FALSE
Sludge	M4PFHpA	367.99	25	0.0679366	2	3.6973e+08	5.44228e+09	1.79816	24.2526	26.1172	28.1274	1.04469	1.04469	1.15977	FALSE	FALSE	7.3902e+09	5.15387e+09	3.63675e+09	18.4105	26.399	37.4117	1.05596	1.05596	2.03209	FALSE	FALSE	9.70836e+09	5.20189e+09	1.28963e+09	14.0144	26.1553	105.501	1.04621	1.04621	7.528	FALSE	FALSE	9.75984	9.37246	8.98374	23.6525	57.7109	141.246	2.30844	2.30844	5.97174	FALSE	FALSE
Sludge	M4PFHpA	367.99	25	0.0679366	3	3.67329e+08	5.40695e+09	1.79816	24.0575	25.9278	27.9457	1.03711	1.03711	1.16162	FALSE	FALSE	7.3902e+09	5.15387e+09	3.63675e+09	18.2909	26.2276	37.1688	1.0491	1.0491	2.03209	FALSE	FALSE	9.70836e+09	5.20189e+09	1.28963e+09	13.9234	25.9855	104.816	1.03942	1.03942	7.528	FALSE	FALSE	9.75984	9.37246	8.98374	23.4989	57.3362	140.329	2.29345	2.29345	5.97174	FALSE	FALSE
Sludge	M4PFHpA	367.99	50	0.135873	1	6.84117e+08	5.03497e+09	1.79816	46.5008	50.23	54.2671	1.0046	1.0046	1.16702	FALSE	FALSE	7.3902e+09	5.15387e+09	3.63675e+09	34.0652	48.8465	69.2235	0.97693	1.02361	2.03209	FALSE	FALSE	9.70836e+09	5.20189e+09	1.28963e+09	25.9311	48.3956	195.209	0.967912	1.03315	7.528	FALSE	FALSE	9.75984	9.37246	8.98374	43.7645	106.783	261.35	2.13567	2.13567	5.97174	FALSE	FALSE
Sludge	M4PFHpA	367.99	50	0.135873	2	7.07518e+08	5.20719e+09	1.79816	48.4236	52.1835	56.2442	1.04367	1.04367	1.1615	FALSE	FALSE	7.3902e+09	5.15387e+09	3.63675e+09	35.2304	50.5173	71.5913	1.01035	1.01035	2.03209	FALSE	FALSE	9.70836e+09	5.20189e+09	1.28963e+09	26.8181	50.051	201.887	1.00102	1.00102	7.528	FALSE	FALSE	9.75984	9.37246	8.98374	45.2615	110.436	270.29	2.20872	2.20872	5.97174	FALSE	FALSE
Sludge	M4PFHpA	367.99	50	0.135873	3	7.02133e+08	5.16756e+09	1.79816	47.9628	51.7331	55.8086	1.03466	1.03466	1.16358	FALSE	FALSE	7.3902e+09	5.15387e+09	3.63675e+09	34.9623	50.1329	71.0465	1.00266	1.00266	2.03209	FALSE	FALSE	9.70836e+09	5.20189e+09	1.28963e+09	26.614	49.6701	200.35	0.993402	1.00664	7.528	FALSE	FALSE	9.75984	9.37246	8.98374	44.917	109.596	268.233	2.19191	2.19191	5.97174	FALSE	FALSE
Sludge	M4PFHpA	367.99	100	0.271746	1	1.32485e+09	4.87533e+09	1.79816	94.0949	101.706	109.96	1.01706	1.01706	1.16861	FALSE	FALSE	7.3902e+09	5.15387e+09	3.63675e+09	65.9702	94.5955	134.057	0.945955	1.05713	2.03209	FALSE	FALSE	9.70836e+09	5.20189e+09	1.28963e+09	50.2178	93.7223	378.04	0.937223	1.06698	7.528	FALSE	FALSE	9.75984	9.37246	8.98374	84.7538	206.795	506.128	2.06795	2.06795	5.97174	FALSE	FALSE
Sludge	M4PFHpA	367.99	100	0.271746	2	1.317e+09	4.84644e+09	1.79816	93.4258	101.005	109.227	1.01005	1.01005	1.16913	FALSE	FALSE	7.3902e+09	5.15387e+09	3.63675e+09	65.5793	94.035	133.263	0.94035	1.06343	2.03209	FALSE	FALSE	9.70836e+09	5.20189e+09	1.28963e+09	49.9203	93.167	375.8	0.93167	1.07334	7.528	FALSE	FALSE	9.75984	9.37246	8.98374	84.2516	205.57	503.129	2.0557	2.0557	5.97174	FALSE	FALSE
Sludge	M4PFHpA	367.99	100	0.271746	3	1.30133e+09	4.78876e+09	1.79816	92.1278	99.6086	107.724	0.996086	1.00393	1.16929	FALSE	FALSE	7.3902e+09	5.15387e+09	3.63675e+09	64.7989	92.9159	131.677	0.929159	1.07624	2.03209	FALSE	FALSE	9.70836e+09	5.20189e+09	1.28963e+09	49.3262	92.0582	371.328	0.920582	1.08627	7.528	FALSE	FALSE	9.75984	9.37246	8.98374	83.2489	203.124	497.141	2.03124	2.03124	5.97174	FALSE	FALSE
Sludge	M4PFHpA	367.99	250	0.679366	1	2.93318e+09	4.31753e+09	1.79816	218.109	235.041	253.371	0.940164	1.06364	1.16167	FALSE	FALSE	7.3902e+09	5.15387e+09	3.63675e+09	146.056	209.431	296.799	0.837726	1.19371	2.03209	FALSE	FALSE	9.70836e+09	5.20189e+09	1.28963e+09	111.181	207.498	836.968	0.829993	1.20483	7.528	FALSE	FALSE	9.75984	9.37246	8.98374	187.642	457.838	1120.55	1.83135	1.83135	5.97174	FALSE	FALSE
Sludge	M4PFHpA	367.99	250	0.679366	2	2.92795e+09	4.30983e+09	1.79816	217.718	234.53	252.722	0.938121	1.06596	1.16078	FALSE	FALSE	7.3902e+09	5.15387e+09	3.63675e+09	145.796	209.058	296.27	0.836233	1.19584	2.03209	FALSE	FALSE	9.70836e+09	5.20189e+09	1.28963e+09	110.983	207.129	835.477	0.828514	1.20698	7.528	FALSE	FALSE	9.75984	9.37246	8.98374	187.308	457.022	1118.55	1.82809	1.82809	5.97174	FALSE	FALSE
Sludge	M4PFHpA	367.99	250	0.679366	3	2.92362e+09	4.30345e+09	1.79816	217.397	234.107	252.182	0.936428	1.06789	1.16001	FALSE	FALSE	7.3902e+09	5.15387e+09	3.63675e+09	145.58	208.749	295.831	0.834995	1.19761	2.03209	FALSE	FALSE	9.70836e+09	5.20189e+09	1.28963e+09	110.818	206.822	834.24	0.827287	1.20877	7.528	FALSE	FALSE	9.75984	9.37246	8.98374	187.03	456.346	1116.9	1.82538	1.82538	5.97174	FALSE	FALSE
Sludge	M8PFOA	422	0.5	0.00118483	1	7.73695e+06	6.53e+09	2.04265	0.493862	0.51886	0.545038	1.03772	1.03772	1.10362	FALSE	FALSE	7.3902e+09	5.20719e+09	3.63772e+09	0.441801	0.627017	0.897541	1.25403	1.25403	2.03155	FALSE	FALSE	9.68773e+09	5.25411e+09	1.29236e+09	0.337024	0.621418	2.52639	1.24284	1.24284	7.49618	FALSE	FALSE	9.90054	9.51375	9.12605	0.410531	1.0003	2.44247	2.0006	2.0006	5.94954	FALSE	FALSE
Sludge	M8PFOA	422	0.5	0.00118483	2	7.2485e+06	6.11774e+09	2.04265	0.455717	0.478315	0.501957	0.956631	1.04534	1.10147	FALSE	FALSE	7.3902e+09	5.20719e+09	3.63772e+09	0.413909	0.587432	0.840877	1.17486	1.17486	2.03155	FALSE	FALSE	9.68773e+09	5.25411e+09	1.29236e+09	0.315747	0.582187	2.36689	1.16437	1.16437	7.49618	FALSE	FALSE	9.90054	9.51375	9.12605	0.384613	0.937147	2.28827	1.87429	1.87429	5.94954	FALSE	FALSE
Sludge	M8PFOA	422	0.5	0.00118483	3	7.50766e+06	6.33648e+09	2.04265	0.474309	0.499773	0.526509	0.999545	1.00045	1.11005	FALSE	FALSE	7.3902e+09	5.20719e+09	3.63772e+09	0.428708	0.608435	0.870942	1.21687	1.21687	2.03155	FALSE	FALSE	9.68773e+09	5.25411e+09	1.29236e+09	0.327036	0.603002	2.45152	1.206	1.206	7.49618	FALSE	FALSE	9.90054	9.51375	9.12605	0.398365	0.970654	2.37009	1.94131	1.94131	5.94954	FALSE	FALSE
Sludge	M8PFOA	422	1	0.00236967	1	1.45924e+07	6.158e+09	2.04265	0.964757	1.01483	1.06736	1.01483	1.01483	1.10635	FALSE	FALSE	7.3902e+09	5.20719e+09	3.63772e+09	0.833266	1.18259	1.69282	1.18259	1.18259	2.03155	FALSE	FALSE	9.68773e+09	5.25411e+09	1.29236e+09	0.635649	1.17204	4.76494	1.17204	1.17204	7.49618	FALSE	FALSE	9.90054	9.51375	9.12605	0.774288	1.88663	4.60666	1.88663	1.88663	5.94954	FALSE	FALSE
Sludge	M8PFOA	422	1	0.00236967	2	1.44089e+07	6.08057e+09	2.04265	0.949875	0.999655	1.0519	0.999655	1.00035	1.10741	FALSE	FALSE	7.3902e+09	5.20719e+09	3.63772e+09	0.822788	1.16772	1.67154	1.16772	1.16772	2.03155	FALSE	FALSE	9.68773e+09	5.25411e+09	1.29236e+09	0.627657	1.1573	4.70503	1.1573	1.1573	7.49618	FALSE	FALSE	9.90054	9.51375	9.12605	0.764552	1.86291	4.54874	1.86291	1.86291	5.94954	FALSE	FALSE
Sludge	M8PFOA	422	1	0.00236967	3	1.38483e+07	5.84399e+09	2.04265	0.910239	0.953449	0.998598	0.953449	1.04882	1.09707	FALSE	TRUE	7.3902e+09	5.20719e+09	3.63772e+09	0.790776	1.12229	1.6065	1.12229	1.12229	2.03155	FALSE	FALSE	9.68773e+09	5.25411e+09	1.29236e+09	0.603236	1.11227	4.52197	1.11227	1.11227	7.49618	FALSE	FALSE	9.90054	9.51375	9.12605	0.734805	1.79042	4.37175	1.79042	1.79042	5.94954	FALSE	FALSE
Sludge	M8PFOA	422	5	0.0118483	1	6.35879e+07	5.36682e+09	2.04265	4.6155	4.83874	5.07255	0.967747	1.03333	1.09902	FALSE	FALSE	7.3902e+09	5.20719e+09	3.63772e+09	3.63104	5.15328	7.37664	1.03066	1.03066	2.03155	FALSE	FALSE	9.68773e+09	5.25411e+09	1.29236e+09	2.76991	5.10727	20.7637	1.02145	1.02145	7.49618	FALSE	FALSE	9.90054	9.51375	9.12605	3.37404	8.22118	20.074	1.64424	1.64424	5.94954	FALSE	FALSE
Sludge	M8PFOA	422	5	0.0118483	2	6.67305e+07	5.63206e+09	2.04265	4.86551	5.10742	5.36112	1.02148	1.02148	1.10186	FALSE	FALSE	7.3902e+09	5.20719e+09	3.63772e+09	3.81049	5.40796	7.74121	1.08159	1.08159	2.03155	FALSE	FALSE	9.68773e+09	5.25411e+09	1.29236e+09	2.9068	5.35968	21.7899	1.07194	1.07194	7.49618	FALSE	FALSE	9.90054	9.51375	9.12605	3.54079	8.62748	21.0661	1.7255	1.7255	5.94954	FALSE	FALSE
Sludge	M8PFOA	422	5	0.0118483	3	6.63711e+07	5.60173e+09	2.04265	4.8339	5.07663	5.33131	1.01533	1.01533	1.1029	FALSE	FALSE	7.3902e+09	5.20719e+09	3.63772e+09	3.78997	5.37884	7.69951	1.07577	1.07577	2.03155	FALSE	FALSE	9.68773e+09	5.25411e+09	1.29236e+09	2.89115	5.33081	21.6725	1.06616	1.06616	7.49618	FALSE	FALSE	9.90054	9.51375	9.12605	3.52172	8.58102	20.9526	1.7162	1.7162	5.94954	FALSE	FALSE
Sludge	M8PFOA	422	10	0.0236967	1	1.26066e+08	5.32001e+09	2.04265	9.55433	10.0365	10.5428	1.00365	1.00365	1.10346	FALSE	FALSE	7.3902e+09	5.20719e+09	3.63772e+09	7.19874	10.2166	14.6246	1.02166	1.02166	2.03155	FALSE	FALSE	9.68773e+09	5.25411e+09	1.29236e+09	5.49149	10.1254	41.1652	1.01254	1.01254	7.49618	FALSE	FALSE	9.90054	9.51375	9.12605	6.68922	16.2989	39.7978	1.62989	1.62989	5.94954	FALSE	FALSE
Sludge	M8PFOA	422	10	0.0236967	2	1.25653e+08	5.30258e+09	2.04265	9.51932	9.99998	10.5048	0.999998	1	1.10352	FALSE	FALSE	7.3902e+09	5.20719e+09	3.63772e+09	7.17516	10.1832	14.5767	1.01832	1.01832	2.03155	FALSE	FALSE	9.68773e+09	5.25411e+09	1.29236e+09	5.47351	10.0923	41.0304	1.00923	1.00923	7.49618	FALSE	FALSE	9.90054	9.51375	9.12605	6.66731	16.2455	39.6674	1.62455	1.62455	5.94954	FALSE	FALSE
Sludge	M8PFOA	422	10	0.0236967	3	1.23558e+08	5.21417e+09	2.04265	9.35005	9.815	10.3029	0.9815	1.01885	1.10191	FALSE	FALSE	7.3902e+09	5.20719e+09	3.63772e+09	7.05552	10.0134	14.3336	1.00134	1.00134	2.03155	FALSE	FALSE	9.68773e+09	5.25411e+09	1.29236e+09	5.38224	9.92398	40.3462	0.992398	1.00766	7.49618	FALSE	FALSE	9.90054	9.51375	9.12605	6.55614	15.9747	39.006	1.59747	1.59747	5.94954	FALSE	FALSE
Sludge	M8PFOA	422	25	0.0592416	1	3.07344e+08	5.18798e+09	2.04265	24.7515	25.9295	27.1643	1.03718	1.03718	1.09748	FALSE	FALSE	7.3902e+09	5.20719e+09	3.63772e+09	17.5502	24.9077	35.6541	0.99631	1.0037	2.03155	FALSE	FALSE	9.68773e+09	5.25411e+09	1.29236e+09	13.388	24.6853	100.359	0.987414	1.01275	7.49618	FALSE	FALSE	9.90054	9.51375	9.12605	16.308	39.7361	97.0252	1.58944	1.58944	5.94954	FALSE	FALSE
Sludge	M8PFOA	422	25	0.0592416	2	3.05857e+08	5.16287e+09	2.04265	24.5983	25.7896	27.0394	1.03158	1.03158	1.09924	FALSE	FALSE	7.3902e+09	5.20719e+09	3.63772e+09	17.4653	24.7872	35.4815	0.991488	1.00859	2.03155	FALSE	FALSE	9.68773e+09	5.25411e+09	1.29236e+09	13.3232	24.5659	99.8732	0.982635	1.01767	7.49618	FALSE	FALSE	9.90054	9.51375	9.12605	16.2291	39.5437	96.5556	1.58175	1.58175	5.94954	FALSE	FALSE
Sludge	M8PFOA	422	25	0.0592416	3	2.99701e+08	5.05895e+09	2.04265	24.0014	25.2115	26.4835	1.00846	1.00846	1.10342	FALSE	FALSE	7.3902e+09	5.20719e+09	3.63772e+09	17.1137	24.2883	34.7674	0.971532	1.0293	2.03155	FALSE	FALSE	9.68773e+09	5.25411e+09	1.29236e+09	13.0551	24.0714	97.863	0.962857	1.03858	7.49618	FALSE	FALSE	9.90054	9.51375	9.12605	15.9024	38.7478	94.6122	1.54991	1.54991	5.94954	FALSE	FALSE
Sludge	M8PFOA	422	50	0.118483	1	5.71729e+08	4.8254e+09	2.04265	47.6626	50.09	52.6447	1.0018	1.0018	1.10453	FALSE	FALSE	7.3902e+09	5.20719e+09	3.63772e+09	32.6473	46.334	66.3246	0.926679	1.07912	2.03155	FALSE	FALSE	9.68773e+09	5.25411e+09	1.29236e+09	24.9047	45.9203	186.69	0.918405	1.08884	7.49618	FALSE	FALSE	9.90054	9.51375	9.12605	30.3366	73.918	180.489	1.47836	1.47836	5.94954	FALSE	FALSE
Sludge	M8PFOA	422	50	0.118483	2	5.82854e+08	4.91929e+09	2.04265	48.7685	51.1943	53.7444	1.02389	1.02389	1.10203	FALSE	FALSE	7.3902e+09	5.20719e+09	3.63772e+09	33.2825	47.2355	67.6151	0.944711	1.05853	2.03155	FALSE	FALSE	9.68773e+09	5.25411e+09	1.29236e+09	25.3893	46.8138	190.323	0.936276	1.06806	7.49618	FALSE	FALSE	9.90054	9.51375	9.12605	30.9268	75.3562	184	1.50712	1.50712	5.94954	FALSE	FALSE
Sludge	M8PFOA	422	50	0.118483	3	5.82924e+08	4.91988e+09	2.04265	48.7758	51.2013	53.751	1.02403	1.02403	1.102	FALSE	FALSE	7.3902e+09	5.20719e+09	3.63772e+09	33.2866	47.2412	67.6233	0.944824	1.0584	2.03155	FALSE	FALSE	9.68773e+09	5.25411e+09	1.29236e+09	25.3923	46.8194	190.346	0.936388	1.06793	7.49618	FALSE	FALSE	9.90054	9.51375	9.12605	30.9306	75.3653	184.023	1.50731	1.50731	5.94954	FALSE	FALSE
Sludge	M8PFOA	422	100	0.236967	1	1.10343e+09	4.6565e+09	2.04265	95.9115	100.846	106.045	1.00846	1.00846	1.10566	FALSE	FALSE	7.3902e+09	5.20719e+09	3.63772e+09	63.0091	89.4243	128.006	0.894243	1.11826	2.03155	FALSE	FALSE	9.68773e+09	5.25411e+09	1.29236e+09	48.0659	88.6259	360.311	0.886259	1.12834	7.49618	FALSE	FALSE	9.90054	9.51375	9.12605	58.5494	142.661	348.342	1.42661	1.42661	5.94954	FALSE	FALSE
Sludge	M8PFOA	422	100	0.236967	2	1.09884e+09	4.63711e+09	2.04265	95.4379	100.359	105.545	1.00359	1.00359	1.1059	FALSE	FALSE	7.3902e+09	5.20719e+09	3.63772e+09	62.7468	89.052	127.473	0.89052	1.12294	2.03155	FALSE	FALSE	9.68773e+09	5.25411e+09	1.29236e+09	47.8658	88.2569	358.811	0.882569	1.13306	7.49618	FALSE	FALSE	9.90054	9.51375	9.12605	58.3056	142.067	346.892	1.42067	1.42067	5.94954	FALSE	FALSE
Sludge	M8PFOA	422	100	0.236967	3	1.07941e+09	4.55511e+09	2.04265	93.5408	98.3034	103.319	0.983034	1.01726	1.10453	FALSE	FALSE	7.3902e+09	5.20719e+09	3.63772e+09	61.6372	87.4773	125.219	0.874773	1.14315	2.03155	FALSE	FALSE	9.68773e+09	5.25411e+09	1.29236e+09	47.0194	86.6963	352.466	0.866963	1.15345	7.49618	FALSE	FALSE	9.90054	9.51375	9.12605	57.2746	139.555	340.758	1.39555	1.39555	5.94954	FALSE	FALSE
Sludge	M8PFOA	422	250	0.592416	1	2.54221e+09	4.29125e+09	2.04265	232.044	244.022	256.656	0.976086	1.0245	1.10606	FALSE	FALSE	7.3902e+09	5.20719e+09	3.63772e+09	145.167	206.025	294.914	0.824101	1.21344	2.03155	FALSE	FALSE	9.68773e+09	5.25411e+09	1.29236e+09	110.739	204.186	830.123	0.816743	1.22438	7.49618	FALSE	FALSE	9.90054	9.51375	9.12605	134.892	328.678	802.548	1.31471	1.31471	5.94954	FALSE	FALSE
Sludge	M8PFOA	422	250	0.592416	2	2.53644e+09	4.28152e+09	2.04265	231.472	243.347	255.869	0.973388	1.02734	1.1054	FALSE	FALSE	7.3902e+09	5.20719e+09	3.63772e+09	144.838	205.558	294.245	0.822232	1.2162	2.03155	FALSE	FALSE	9.68773e+09	5.25411e+09	1.29236e+09	110.488	203.723	828.24	0.814891	1.22716	7.49618	FALSE	FALSE	9.90054	9.51375	9.12605	134.586	327.933	800.728	1.31173	1.31173	5.94954	FALSE	FALSE
Sludge	M8PFOA	422	250	0.592416	3	2.53922e+09	4.2862e+09	2.04265	231.746	243.671	256.248	0.974685	1.02597	1.10573	FALSE	FALSE	7.3902e+09	5.20719e+09	3.63772e+09	144.996	205.783	294.567	0.823131	1.21487	2.03155	FALSE	FALSE	9.68773e+09	5.25411e+09	1.29236e+09	110.609	203.945	829.145	0.815781	1.22582	7.49618	FALSE	FALSE	9.90054	9.51375	9.12605	134.733	328.291	801.602	1.31317	1.31317	5.94954	FALSE	FALSE
Sludge	M3PFHxS	402.954	0.474	0.00117631	1	1.22235e+07	1.03914e+10	2.39536	0.439055	0.480897	0.526446	1.01455	1.01455	1.19904	FALSE	FALSE	1.13039e+10	5.40073e+09	2.26949e+09	0.435737	0.912009	2.17032	1.92407	1.92407	4.9808	FALSE	FALSE	9.43077e+09	5.12344e+09	1.27932e+09	0.522281	0.961369	3.85009	2.02821	2.02821	7.37169	TRUE	FALSE	10.0869	9.70522	9.3265	0.403204	0.971025	2.32246	2.04858	2.04858	5.76	FALSE	FALSE
Sludge	M3PFHxS	402.954	0.474	0.00117631	2	1.22498e+07	1.04137e+10	2.39536	0.440298	0.482204	0.527817	1.01731	1.01731	1.19877	FALSE	FALSE	1.13039e+10	5.40073e+09	2.26949e+09	0.436673	0.913969	2.17498	1.92821	1.92821	4.9808	FALSE	FALSE	9.43077e+09	5.12344e+09	1.27932e+09	0.523404	0.963436	3.85837	2.03257	2.03257	7.37169	TRUE	FALSE	10.0869	9.70522	9.3265	0.404071	0.973112	2.32745	2.05298	2.05298	5.76	FALSE	FALSE
Sludge	M3PFHxS	402.954	0.474	0.00117631	3	1.22183e+07	1.03869e+10	2.39536	0.438808	0.480637	0.526172	1.014	1.014	1.19909	FALSE	FALSE	1.13039e+10	5.40073e+09	2.26949e+09	0.43555	0.911618	2.16939	1.92324	1.92324	4.9808	FALSE	FALSE	9.43077e+09	5.12344e+09	1.27932e+09	0.522057	0.960958	3.84844	2.02734	2.02734	7.37169	TRUE	FALSE	10.0869	9.70522	9.3265	0.403032	0.970609	2.32146	2.0477	2.0477	5.76	FALSE	FALSE
Sludge	M3PFHxS	402.954	0.948	0.00235263	1	2.2404e+07	9.52296e+09	2.39536	0.841452	0.919065	1.00343	0.969478	1.03148	1.1925	FALSE	FALSE	1.13039e+10	5.40073e+09	2.26949e+09	0.798643	1.67158	3.97788	1.76327	1.76327	4.9808	FALSE	FALSE	9.43077e+09	5.12344e+09	1.27932e+09	0.957267	1.76205	7.05667	1.85871	1.85871	7.37169	TRUE	FALSE	10.0869	9.70522	9.3265	0.739017	1.77975	4.25674	1.87737	1.87737	5.76	FALSE	FALSE
Sludge	M3PFHxS	402.954	0.948	0.00235263	2	2.19328e+07	9.32269e+09	2.39536	0.822199	0.895725	0.975454	0.944857	1.05836	1.1864	FALSE	FALSE	1.13039e+10	5.40073e+09	2.26949e+09	0.781847	1.63643	3.89423	1.72619	1.72619	4.9808	FALSE	FALSE	9.43077e+09	5.12344e+09	1.27932e+09	0.937135	1.725	6.90826	1.81962	1.81962	7.37169	FALSE	FALSE	10.0869	9.70522	9.3265	0.723474	1.74232	4.16721	1.83789	1.83789	5.76	FALSE	FALSE
Sludge	M3PFHxS	402.954	0.948	0.00235263	3	2.19029e+07	9.30998e+09	2.39536	0.821025	0.894246	0.973628	0.943298	1.06011	1.18587	FALSE	FALSE	1.13039e+10	5.40073e+09	2.26949e+09	0.780781	1.6342	3.88892	1.72384	1.72384	4.9808	FALSE	FALSE	9.43077e+09	5.12344e+09	1.27932e+09	0.935857	1.72264	6.89885	1.81714	1.81714	7.37169	FALSE	FALSE	10.0869	9.70522	9.3265	0.722488	1.73995	4.16153	1.83539	1.83539	5.76	FALSE	FALSE
Sludge	M3PFHxS	402.954	4.74	0.0117631	1	9.69138e+07	8.23877e+09	2.39536	4.10762	4.45808	4.83779	0.940523	1.06324	1.17776	FALSE	FALSE	1.13039e+10	5.40073e+09	2.26949e+09	3.45472	7.23083	17.2073	1.52549	1.52549	4.9808	FALSE	FALSE	9.43077e+09	5.12344e+09	1.27932e+09	4.14089	7.62219	30.5253	1.60806	1.60806	7.37169	FALSE	FALSE	10.0869	9.70522	9.3265	3.19679	7.69874	18.4135	1.62421	1.62421	5.76	FALSE	FALSE
Sludge	M3PFHxS	402.954	4.74	0.0117631	2	1.03031e+08	8.75882e+09	2.39536	4.38406	4.77916	5.20914	1.00826	1.00826	1.1882	FALSE	FALSE	1.13039e+10	5.40073e+09	2.26949e+09	3.67279	7.68725	18.2934	1.62178	1.62178	4.9808	FALSE	FALSE	9.43077e+09	5.12344e+09	1.27932e+09	4.40227	8.10331	32.4521	1.70956	1.70956	7.37169	FALSE	FALSE	10.0869	9.70522	9.3265	3.39858	8.18469	19.5758	1.72673	1.72673	5.76	FALSE	FALSE
Sludge	M3PFHxS	402.954	4.74	0.0117631	3	1.04329e+08	8.86919e+09	2.39536	4.44927	4.84759	5.28086	1.0227	1.0227	1.1869	FALSE	FALSE	1.13039e+10	5.40073e+09	2.26949e+09	3.71908	7.78413	18.524	1.64222	1.64222	4.9808	FALSE	FALSE	9.43077e+09	5.12344e+09	1.27932e+09	4.45774	8.20543	32.8611	1.7311	1.7311	7.37169	FALSE	FALSE	10.0869	9.70522	9.3265	3.44141	8.28784	19.8225	1.74849	1.74849	5.76	FALSE	FALSE
Sludge	M3PFHxS	402.954	9.48	0.0235263	1	2.01588e+08	8.56862e+09	2.39536	9.07138	9.8663	10.7306	1.04075	1.04075	1.1829	FALSE	FALSE	1.13039e+10	5.40073e+09	2.26949e+09	7.18608	15.0407	35.7924	1.58657	1.58657	4.9808	FALSE	FALSE	9.43077e+09	5.12344e+09	1.27932e+09	8.61335	15.8547	63.4949	1.67244	1.67244	7.37169	FALSE	FALSE	10.0869	9.70522	9.3265	6.64957	16.0139	38.3015	1.68923	1.68923	5.76	FALSE	FALSE
Sludge	M3PFHxS	402.954	9.48	0.0235263	2	1.93929e+08	8.24308e+09	2.39536	8.66755	9.44539	10.2926	0.996349	1.00366	1.18749	FALSE	FALSE	1.13039e+10	5.40073e+09	2.26949e+09	6.91306	14.4692	34.4326	1.52629	1.52629	4.9808	FALSE	FALSE	9.43077e+09	5.12344e+09	1.27932e+09	8.28611	15.2523	61.0826	1.6089	1.6089	7.37169	FALSE	FALSE	10.0869	9.70522	9.3265	6.39693	15.4055	36.8463	1.62506	1.62506	5.76	FALSE	FALSE
Sludge	M3PFHxS	402.954	9.48	0.0235263	3	1.96218e+08	8.34039e+09	2.39536	8.7837	9.571	10.4285	1.0096	1.0096	1.18726	FALSE	FALSE	1.13039e+10	5.40073e+09	2.26949e+09	6.99467	14.64	34.8391	1.54431	1.54431	4.9808	FALSE	FALSE	9.43077e+09	5.12344e+09	1.27932e+09	8.38393	15.4324	61.8037	1.62789	1.62789	7.37169	FALSE	FALSE	10.0869	9.70522	9.3265	6.47245	15.5874	37.2813	1.64424	1.64424	5.76	FALSE	FALSE
Sludge	M3PFHxS	402.954	23.7	0.0588157	1	4.76097e+08	8.09474e+09	2.39536	22.9498	24.9351	27.0948	1.05211	1.05211	1.18061	FALSE	FALSE	1.13039e+10	5.40073e+09	2.26949e+09	16.9716	35.5221	84.5323	1.49882	1.49882	4.9808	FALSE	FALSE	9.43077e+09	5.12344e+09	1.27932e+09	20.3425	37.4446	149.958	1.57994	1.57994	7.37169	FALSE	FALSE	10.0869	9.70522	9.3265	15.7045	37.8207	90.4581	1.59581	1.59581	5.76	FALSE	FALSE
Sludge	M3PFHxS	402.954	23.7	0.0588157	2	4.64697e+08	7.90091e+09	2.39536	22.2748	24.2611	26.4273	1.02368	1.02368	1.18642	FALSE	FALSE	1.13039e+10	5.40073e+09	2.26949e+09	16.5652	34.6715	82.5082	1.46293	1.46293	4.9808	FALSE	FALSE	9.43077e+09	5.12344e+09	1.27932e+09	19.8554	36.548	146.368	1.54211	1.54211	7.37169	FALSE	FALSE	10.0869	9.70522	9.3265	15.3285	36.9151	88.2921	1.5576	1.5576	5.76	FALSE	FALSE
Sludge	M3PFHxS	402.954	23.7	0.0588157	3	4.71085e+08	8.00952e+09	2.39536	22.6472	24.6385	26.8076	1.0396	1.0396	1.1837	FALSE	FALSE	1.13039e+10	5.40073e+09	2.26949e+09	16.793	35.1481	83.6424	1.48304	1.48304	4.9808	FALSE	FALSE	9.43077e+09	5.12344e+09	1.27932e+09	20.1283	37.0505	148.38	1.56331	1.56331	7.37169	FALSE	FALSE	10.0869	9.70522	9.3265	15.5392	37.4226	89.5058	1.57901	1.57901	5.76	FALSE	FALSE
Sludge	M3PFHxS	402.954	47.4	0.117631	1	8.68749e+08	7.38535e+09	2.39536	43.6373	47.5861	51.9028	1.00393	1.00393	1.18941	FALSE	FALSE	1.13039e+10	5.40073e+09	2.26949e+09	30.9686	64.8182	154.249	1.36747	1.36747	4.9808	FALSE	FALSE	9.43077e+09	5.12344e+09	1.27932e+09	37.1195	68.3263	273.633	1.44148	1.44148	7.37169	FALSE	FALSE	10.0869	9.70522	9.3265	28.6565	69.0126	165.061	1.45596	1.45596	5.76	FALSE	FALSE
Sludge	M3PFHxS	402.954	47.4	0.117631	2	8.81868e+08	7.49688e+09	2.39536	44.4152	48.4114	52.7781	1.02134	1.02134	1.18829	FALSE	FALSE	1.13039e+10	5.40073e+09	2.26949e+09	31.4363	65.797	156.578	1.38812	1.38812	4.9808	FALSE	FALSE	9.43077e+09	5.12344e+09	1.27932e+09	37.6801	69.3582	277.766	1.46325	1.46325	7.37169	FALSE	FALSE	10.0869	9.70522	9.3265	29.0893	70.0548	167.554	1.47795	1.47795	5.76	FALSE	FALSE
Sludge	M3PFHxS	402.954	47.4	0.117631	3	9.1533e+08	7.78135e+09	2.39536	46.5575	50.5264	54.844	1.06596	1.06596	1.17799	FALSE	FALSE	1.13039e+10	5.40073e+09	2.26949e+09	32.6291	68.2937	162.519	1.44079	1.44079	4.9808	FALSE	FALSE	9.43077e+09	5.12344e+09	1.27932e+09	39.1098	71.9899	288.305	1.51877	1.51877	7.37169	FALSE	FALSE	10.0869	9.70522	9.3265	30.193	72.7129	173.912	1.53403	1.53403	5.76	FALSE	FALSE
Sludge	M3PFHxS	402.954	94.8	0.235263	1	1.7017e+09	7.23318e+09	2.39536	90.4053	98.5309	107.42	1.03936	1.03936	1.1882	FALSE	FALSE	1.13039e+10	5.40073e+09	2.26949e+09	60.6611	126.965	302.141	1.3393	1.3393	4.9808	FALSE	FALSE	9.43077e+09	5.12344e+09	1.27932e+09	72.7094	133.837	535.991	1.41178	1.41178	7.37169	FALSE	FALSE	10.0869	9.70522	9.3265	56.1321	135.181	323.321	1.42596	1.42596	5.76	FALSE	FALSE
[truncated: 287 more rows]
